# Supplementary material for: Glial insulin regulates cooperative or antagonistic Golden goal/Flamingo interactions during photoreceptor axon guidance
Source: eLife. 2021 Mar 5;10:e66718. doi: 10.7554/eLife.66718 (PMC7987344; doi:10.7554/eLife.66718)
Supplement: Figure 1—source data 1. [file elife-66718-fig1-data1.xls]

## Sheet: Fig.1C-G(GFP)
	L3	0.24	0.4	0.48	adult
1	52.964	39.712	11.222	6.419	5.31
2	48.641	36.568	10.114	5.82	4.778
3	53.086	33.192	11.058	4.797	4.423
4	51.486	34.614	14.635	5.586	4.135
5	54.483	34.574	16.25	4.902	4.337
6	52.537	30.875	17	4.91	4.512
7	58.486	32.688	16.912	4.826	4.488
8	54.436	31.471	16.417	4.767	4.605
9	49.7	30.871	10	5.244	4.465
10	46.726	29.957	9.417	8.023	4.302
11	53.301	35.302	15.098	5.151	4.372
12	53.143	39.708	14.379	4.535	4.884
13	56.512	30.025	14.13	5.255	4.849
14	57.657	32.734	12.375	4.265	4.821
15	58.989	37.278	12.304	4.402	4.819
16	44.262	28.882	16.805	6.363	4.882
17	56.341	30.116	12.906	5.275	5.062
18	57.217	32.017	11.15	4.814	5.268
19	50.157	36.183	10.678	5.897	5.946
20	53.977	38.5	10.671	10.041	6.518
21	45.189	29.969	9.775	7.546	5.929
22	47.372	27.435	14.776	6.474	6.42
23	50.931	36.33	14.826	7.041	6.071
24	57.535	31.313	16.076	5.044	6.526
	52.7137	33.3464	13.2906	5.72488	5.07175

## Sheet: Fig.1H-L(mCherry)
	L3	0.24	0.4	0.48	adult
1	65.451	42.813	19.538	21.154	7.118
2	63.667	45.486	20.092	19.569	7.728
3	70.671	41.766	19.953	22.385	7.654
4	74.493	47.533	25.531	22.915	7.331
5	73.595	53.292	20.711	22.577	7.463
6	63.582	48.804	18.633	22.636	8.706
7	59.643	51.062	19.439	20.669	9.25
8	48.526	49.723	18.824	20.522	8.713
9	51.968	52.571	21.493	19.831	7.39
10	60.674	37.932	19.534	18.397	8.889
11	60.919	39.007	23.02	18.787	7.403
12	48.176	46.953	24.014	22.71	7.823
13	62.684	41.541	22.959	26.913	9.091
14	56.666	47.203	20.959	20.306	8.419
15	58.632	53.885	26.284	19.546	8.78
16	54.19	51.797	25.061	22.213	8.07
17	56.969	51.914	23.236	21.404	8.898
18	49.687	51.508	18.811	20.384	9.984
19	44.605	51.406	25.531	23.116	9.414
20	37.931	55.508	19.789	20.07	9.398
21	52.188	49.055	19.109	22.244	10.145
22	58.021	43.695	23.633	24.257	8.452
23	52.956	39.758	22.609	19.786	7.742
24	36.03	48.32	24.836	20.076	7.177
	56.7468	47.6055	21.8166	21.3528	8.37658
