# Supplementary material for: Glial insulin regulates cooperative or antagonistic Golden goal/Flamingo interactions during photoreceptor axon guidance
Source: eLife. 2021 Mar 5;10:e66718. doi: 10.7554/eLife.66718 (PMC7987344; doi:10.7554/eLife.66718)
Supplement: Figure 1—source data 2. [file elife-66718-fig1-data2.xlsx]

## Sheet: Sheet1
	gogo 1		fmi 1		gogo 2		fmi 2		gogo 3		fmi 3		gogo 4		fmi 4		gogo 5		fmi 5		gogo 6		fmi 6		gogo 7		fmi 7		gogo 8		fmi 8		gogo	fmi	gogo-GFP	fmi-mCherry
0	0	0	0	0	0	0	0	0	0	0	12.5833	0	0	0	6.1667	0	0.9167	0	18.9167	0	0.3333	0	13.8333	0	0	0	9.25	0	0	0	10.6667		0.15625	8.92709	0.000302059	0.0147981
1	0	1	0	1	0	1	0	1	0.2631	1	14.0777	1	0	1	7.0833	1	0.5238	1	24.2398	1	1.2347	1	14.3605	1	0.0208	1	11.6652	1	1.5631	1	12.6134		0.450687	10.505	0.000871258	0.0174137
2	0.1289	2	0.0288	2	1.4785	2	1.4624	2	0	2	17.7075	2	0	2	9.3333	2	0	2	27.1531	2	3.7041	2	17.4337	2	0	2	14.1795	2	0	2	10.7666		0.663937	12.2581	0.00128351	0.0203198
3	0.0494	3	1.2593	3	5.1425	3	3.1237	3	0	3	16.8537	3	0	3	9.6667	3	1.551	3	28.2534	3	0.1531	3	21.6293	3	2.5906	3	16.6031	3	0	3	6.994		1.18583	13.0479	0.00229241	0.021629
4	0.1605	4	5.251	4	10.5968	4	4.2419	4	0	4	16.4626	4	0.3333	4	8.75	4	7.4082	4	28.7211	4	1.7143	4	24.5068	4	5.3726	4	18.1399	4	5.5867	4	8.0952		3.89655	14.2711	0.00753271	0.0236566
5	4.4012	5	11.7572	5	15.0108	5	9.0726	5	0.0332	5	15.3352	5	0.3333	5	9.0833	5	8.4371	5	25.4949	5	2.4983	5	25.2296	5	1.3287	5	18.3589	5	3.735	5	8.1107		4.4722	15.3053	0.00864554	0.025371
6	10.3148	6	18.3395	6	14.7984	6	14.4839	6	3.2432	6	17.9315	6	1.8333	6	12.0833	6	14.1429	6	21.0136	6	0	6	23.432	6	0.2146	6	19.657	6	0.0655	6	7.9745		5.57659	16.8644	0.0107805	0.0279555
7	17.0775	7	23.8038	7	15.0565	7	20.4758	7	3.9583	7	19.2292	7	1.8333	7	15.25	7	21.8333	7	21.5	7	0	7	24	7	0.701	7	22.3021	7	1.3594	7	11.6354		7.72741	19.7745	0.0149384	0.0327795
8	33.0645	8	30.2997	8	17.3145	8	28.9328	8	9.131	8	26.5357	8	0	8	15.0833	8	14.3759	8	25.5578	8	3.0068	8	23.9422	8	0.8258	8	20.3972	8	4.0612	8	13.5442		10.2225	23.0366	0.0197618	0.0381869
9	47.2778	9	41.4444	9	20.8091	9	35.3683	9	11.6675	9	26.9377	9	3.5	9	14.4167	9	21.2279	9	30.2993	9	6.4779	9	27.0306	9	8.0414	9	22.4501	9	10.8498	9	14.9596		16.2314	26.6133	0.0313782	0.0441159
10	56.9609	10	45.0857	10	15.8844	10	39.8979	10	30.932	10	27.4413	10	5.6667	10	16.3333	10	33.0714	10	35.5476	10	0.7262	10	26.7925	10	11.0963	10	22.7906	10	16.1318	10	17.4545		21.3087	28.9179	0.0411935	0.0479362
11	68.3786	11	47.3457	11	8.6478	11	42.6586	11	36.776	11	30.4837	11	4.5833	11	21.0833	11	49.6718	11	44.0323	11	2.0136	11	29.4915	11	5.9278	11	21.8555	11	21.4893	11	21.6318		24.686	32.3228	0.0477224	0.0535803
12	65.4444	12	48.9383	12	11.3925	12	40.7581	12	58.3333	12	28.966	12	8.0833	12	25.3333	12	59.0425	12	45.3401	12	7.0782	12	32.3095	12	31.1466	12	17.0173	12	15.398	12	27.0663		31.9899	33.2161	0.061842	0.0550611
13	72.7956	13	48.6536	13	9.8737	13	36.8253	13	71.3531	13	28.1341	13	20.9167	13	28.5833	13	68.3741	13	43.5187	13	16.216	13	40.2092	13	34.9078	13	17.9584	13	17.287	13	31.6243		38.9655	34.4384	0.0753271	0.0570872
14	73.5487	14	46.0796	14	8.0457	14	34.3226	14	75.1042	14	32.3542	14	45.5833	14	32.3333	14	76	14	42.3333	14	19.3333	14	42.6667	14	31.2226	14	20.3487	14	8.9167	14	31.8958		42.2193	35.2918	0.0816173	0.0585019
15	60.1543	15	38.8025	15	4.5296	15	32.0806	15	59.2472	15	34.3955	15	65.0833	15	34.8333	15	79.1888	15	38.835	15	17.5578	15	41.8299	15	40.6306	15	20.57	15	11.2188	15	37.5433		42.2013	34.8613	0.0815825	0.0577882
16	35.2709	16	34.5021	16	0.2903	16	29.0457	16	47.0408	16	34.8912	16	66.9167	16	35.8333	16	71.6514	16	33.4303	16	23.1156	16	39.7517	16	22.3736	16	22.0128	16	16	16	40.0816		35.3324	33.6936	0.0683037	0.0558526
17	21.9074	17	29.1289	17	0	17	28.6263	17	36.9923	17	33.3464	17	62.75	17	33.8333	17	59.1922	17	31.7364	17	48.6139	17	35.8078	17	30.8657	17	25.302	17	19.5699	17	41.25		34.9864	32.3789	0.0676349	0.0536733
18	26.5	18	23.7778	18	0	18	30.3871	18	30.6922	18	30.662	18	59.5833	18	30.0833	18	52.7619	18	28.5374	18	65.4405	18	31.0748	18	46.0422	18	27.333	18	26.8274	18	39.5		38.4809	30.1694	0.0743904	0.0500107
19	10.1049	19	18.6975	19	0.5699	19	31.5699	19	26.9229	19	26.5458	19	51.5833	19	24.5	19	46.301	19	22.3197	19	60.8793	19	30.3452	19	37.9586	19	32.5062	19	27.8025	19	36.9135		32.7653	27.9247	0.063341	0.0462898
20	2.1728	20	17.7551	20	3.7016	20	29.9409	20	25.4218	20	23.5306	20	38.9167	20	19.9167	20	31.1956	20	23.5255	20	54.9388	20	29.068	20	30.7461	20	32.0437	20	37.4779	20	34.3827		28.0714	26.2704	0.0542669	0.0435475
21	0	21	14.6667	21	3.5538	21	27.4301	21	19.974	21	23.3177	21	20.5833	21	15.75	21	15.1667	21	21.3333	21	70.5	21	24	21	29.5746	21	30.4815	21	49.4844	21	30.3906		26.1046	23.4212	0.0504647	0.0388245
22	0	22	12.6111	22	0.6048	22	25.0806	22	15.5187	22	22.0587	22	5.4167	22	10.5833	22	13.9286	22	14.9184	22	66.8861	22	20.8673	22	23.493	22	28.0637	22	38.381	22	25.0502		20.5286	19.9042	0.0396854	0.0329944
23	0	23	9.2764	23	0	23	22.1989	23	13.6393	23	19.3173	23	2.3333	23	7.8333	23	12.6837	23	12.5068	23	81.8418	23	15.4575	23	11.7153	23	21.7305	23	28.623	23	18.6842		18.8545	15.8756	0.0364491	0.0263164
24	0	24	7.3395	24	0	24	19.8306	24	5.1224	24	16.8282	24	3.9167	24	6	24	17.8333	24	9.6088	24	49.8197	24	9.2143	24	6.632	24	16.1786	24	17.8776	24	13.8844		12.6502	12.3605	0.0244551	0.0204896
25	0	25	4.618	25	0	25	18.5161	25	1.2234	25	14.5467	25	2.75	25	3.5	25	8.7228	25	2.4524	25	27.9881	25	4.3878	25	3.952	25	8.1364	25	17.9843	25	8.6928		7.82757	8.10628	0.0151321	0.0134375
26	0	26	3.5604	26	0	26	16.6989	26	1.2772	26	12.3542	26	0	26	1	26	1.3265	26	0.3401	26	26.3656	26	3.4847	26	4.8119	26	4.4799	26	9.4141	26	4.0208		5.39941	5.74238	0.010438	0.00951892
27	0	27	2.1667	27	0	27	14.8011	27	0.3831	27	12.8468	27	0	27	0	27	0.6531	27	0	27	20.2126	27	1.8384	27	4.5321	27	1.0911	27	2.7816	27	1.5599		3.57031	4.288	0.00690204	0.00710806
28	0	28	0	28	0.5645	28	14.6102	28	2.585e-26	28	13	28	0	28	0	28	0	28	0	28	4.5	28	2.085e-13	28	0	28	0	28	1	28	0.1667		0.758062	3.47211	0.00146547	0.00575559
																																	517.284	603.259	1	1
