# Supplementary material for: Glial insulin regulates cooperative or antagonistic Golden goal/Flamingo interactions during photoreceptor axon guidance
Source: eLife. 2021 Mar 5;10:e66718. doi: 10.7554/eLife.66718 (PMC7987344; doi:10.7554/eLife.66718)
Supplement: Figure 2—source data 1. [file elife-66718-fig2-data1.xlsx]

## Sheet: Fig.2A-C
	CON								Gogo								fmi
	Area	Mean	Angle	IntDen	RawIntDen	Length			Area	Mean	Angle	IntDen	RawIntDen	Length			Area	Mean	Angle	IntDen	RawIntDen	Length
1	69	91.582	-77.486	6319.18	6319.18	68.46		1	58	42.638	-62.987	2473.02	2473.02	57.245		1	57	81.712	-12.308	4657.57	4657.57	56.294
2	59	94.302	-90.988	5563.82	5563.82	58.009		2	58	50.723	-47.862	2941.92	2941.92	56.639		2	68	63.931	-77.005	4347.33	4347.33	66.708
3	61	59.303	-78.503	3617.46	3617.46	60.208		3	65	44.292	128.66	2878.96	2878.96	64.031		3	67	61.311	-68.839	4107.86	4107.86	66.483
4	55	111.421	-70.56	6128.16	6128.16	54.083		4	65	45.399	140.08	2950.94	2950.94	63.891		4	67	58.175	-61.876	3897.75	3897.75	65.765
5	62	54.706	-69.869	3391.76	3391.76	60.531		5	62	54.941	-61.763	3406.36	3406.36	61.294		5	63	95.262	-10.222	6001.54	6001.54	61.984
6	65	61.837	-83.758	4019.4	4019.4	64.382		6	65	58.875	-67.895	3826.87	3826.87	64.221		6	55	62.698	-68.199	3448.36	3448.36	53.852
7	62	58.971	-69.775	3656.22	3656.22	60.745		7	60	117.208	133.636	7032.48	7032.48	59.414		7	66	57.695	-72.121	3807.85	3807.85	65.146
8	59	65.115	-87.039	3841.77	3841.77	58.078		8	62	111.83	127.626	6933.44	6933.44	60.605		8	62	64.686	-73.926	4010.55	4010.55	61.4
9	61	64.027	-90	3905.67	3905.67	60		9	67	57.716	-63.825	3866.97	3866.97	65.742		9	68	59.95	-73.465	4076.57	4076.57	66.761
10	55	108.925	115.145	5990.87	5990.87	54.129		10	62	114.999	116.147	7129.92	7129.92	61.27		10	68	58.342	-95.838	3967.27	3967.27	67.182
11	64	116.106	117.378	7430.79	7430.79	63.063		11	65	65.254	-80.981	4241.5	4241.5	63.789		11	64	60.085	-40.503	3845.46	3845.46	63.127
12	70	103.024	-66.801	7211.65	7211.65	68.542		12	62	106.886	126.304	6626.94	6626.94	60.803		12	58	72.575	-76.931	4209.36	4209.36	57.489
13	52	106.152	127.093	5519.92	5519.92	51.4		13	60	63.487	-79.261	3809.24	3809.24	59.034		13	61	58.821	-100.561	3588.1	3588.1	60.017
14	69	118.421	121.109	8171.03	8171.03	67.742		14	54	56.999	-71.222	3077.92	3077.92	52.811		14	54	72.302	-158.806	3904.32	3904.32	52.555
15	71	129.458	129.806	9191.51	9191.51	70.292		15	65	61.255	-83.758	3981.58	3981.58	64.382		15	53	65.647	-135.785	3479.29	3479.29	51.624
16	65	118.099	126.69	7676.41	7676.41	63.6		16	65	66.187	82.415	4302.15	4302.15	64.397		16	61	50.142	-11.497	3058.69	3058.69	60.208
17	63	96.017	134.341	6049.09	6049.09	61.522		17	64	68.81	114.52	4403.83	4403.83	62.65		17	66	60.31	82.983	3980.43	3980.43	65.49
18	68	120.427	-49.865	8189.04	8189.04	66.708		18	61	68.755	124.756	4194.03	4194.03	59.641		18	63	57.118	-69.228	3598.43	3598.43	62.032
					0.386537	61.7497							0.383186	61.2144							0.383972	61.3398
					10um	159.751
