# Supplementary material for: Glial insulin regulates cooperative or antagonistic Golden goal/Flamingo interactions during photoreceptor axon guidance
Source: eLife. 2021 Mar 5;10:e66718. doi: 10.7554/eLife.66718 (PMC7987344; doi:10.7554/eLife.66718)
Supplement: Figure 2—source data 3. [file elife-66718-fig2-data3.xlsx]

## Sheet: Sheet1
WT	Normal	Abnormal		gogo-	Normal	Abnormal		fmi-	Normal	Abnormal
1	56	2		1	24	28		1	38	4
	40	2			30	20			42	6
2	48	0		2	16	28		2	42	2
	50	0			22	24			42	0
3	48	0		3	20	20		3	46	2
	46	0			20	26			42	4
4	42	2		4	26	24		4	46	4
	40	2			24	28			50	4
5	46	1		5	26	22		5	40	2
	40	0			20	22			44	6
計	456	9			228	242			432	34
		WT (n=5, 465 axons)				gogo LOF (n=5, 470)				fmi LOF (n=5, 466)		hts LOF (n=3, 382)
		0.0193548				0.514894				0.0729614		0.447644
