# Supplementary material for: Glial insulin regulates cooperative or antagonistic Golden goal/Flamingo interactions during photoreceptor axon guidance
Source: eLife. 2021 Mar 5;10:e66718. doi: 10.7554/eLife.66718 (PMC7987344; doi:10.7554/eLife.66718)
Supplement: Figure 2—source data 4. [file elife-66718-fig2-data4.xlsx]

## Sheet: Sheet1
WT	M3	M1		gogo-	M3	M1		fmi-	M3	M1
1	24	1		1	18	4		1	1	17
	22	2			23	1			0	24
2	22	1		2	21	3		2	0	19
	22	0			20	3			1	20
3	21	1		3	22	0		3	0	24
	20	1			21	1			0	21
4	21	3		4	15	7		4	0	20
	21	4			17	4			0	20
5	23	0		5	17	6		5	2	20
	21	2			14	7			0	22
total	217	15			188	36			4	207
		WT (n=5, 232 axons)				gogo LOF (n=5, 224)				fmi LOF (n=5, 211)
		0.0646552				0.160714				0.981043
