# Supplementary material for: Glial insulin regulates cooperative or antagonistic Golden goal/Flamingo interactions during photoreceptor axon guidance
Source: eLife. 2021 Mar 5;10:e66718. doi: 10.7554/eLife.66718 (PMC7987344; doi:10.7554/eLife.66718)
Supplement: Figure 3—figure supplement 2—source data 1. [file elife-66718-fig3-figsupp2-data1.xlsx]

## Sheet: Sheet1
	U-Fmi + GogoΔN-H (ΔCUB & GOGO1) (n=539)	U-Fmi + GogoΔN-G (ΔCUB) (n=456	U-Fmi + GogoΔN-E (ΔTSP1) (n=562)	U-Fmi + GogoΔN-D (ΔGOGO1〜4) (n=563)	U-Fmi + Gogo (n=543)	U-Fmi (n=528)		U-Fmi (n=528)	U-Fmi + Gogo (n=543)	U-Fmi + GogoΔN-D (ΔGOGO1〜4) (n=563)	U-Fmi + GogoΔN-E (ΔTSP1) (n=562)	U-Fmi + GogoΔN-G (ΔCUB) (n=456	U-Fmi + GogoΔN-H (ΔCUB & GOGO1) (n=539)
	0.730983	0.539474	0.774021	0.802842	0.480663	0.778409		0.778409	0.480663	0.802842	0.774021	0.539474	0.730983
5	145	210	127	111	282	117
15	307	202	230	256	227	239
25	73	30	153	123	26	99
25~ (μm)	14	14	52	73	8	73
	539	456	562	563	543	528
	394	246	435	452	261	411
	U-Fmi + GogoΔN-H (ΔCUB & GOGO1) (n=539)	U-Fmi + GogoΔN-G (ΔCUB) (n=456	U-Fmi + GogoΔN-E (ΔTSP1) (n=562)	U-Fmi + GogoΔN-D (ΔGOGO1〜4) (n=563)	U-Fmi + Gogo (n=543)	U-Fmi (n=528)
5	145	210	127	111	282	117
10	158	130	118	130	160	120
15	149	72	112	126	67	119
15~	87	44	205	196	34	172
	U-Fmi + GogoΔN-H (ΔCUB & GOGO1) (n=4, 539)	U-Fmi + GogoΔN-G (ΔCUB) (n=4, 456)	U-Fmi + GogoΔN-E (ΔTSP1) (n=4, 562)	U-Fmi + GogoΔN-D (ΔGOGO1〜4) (n=4, 563)	U-Fmi + Gogo (n=4, 543)	U-Fmi (n=4, 528 axons)
〜5	145	210	127	111	282	117
5〜15	307	202	230	256	227	239
15〜	87	44	205	196	34	172
	0.269017	0.460526	0.225979	0.197158	0.519337	0.221591
