# Supplementary material for: Glial insulin regulates cooperative or antagonistic Golden goal/Flamingo interactions during photoreceptor axon guidance
Source: eLife. 2021 Mar 5;10:e66718. doi: 10.7554/eLife.66718 (PMC7987344; doi:10.7554/eLife.66718)
Supplement: Figure 3—source data 1. [file elife-66718-fig3-data1.xlsx]

## Sheet: Sheet1
	NOMAL	abnormal
CON	60	3
CON	66	3
CON	67	0
CON	71	4
total	264	10	274	0.0364964
gogo	26	18					control (n=4, 274 axons)	0.0364964
gogo	32	17					gogo RNAi (n=6, 225)	0.382222
gogo	24	14					fmi RNAi (n=7, 219)	0.118721
gogo	19	18					gogo fmi RNAi (n=6, 265)	0.766038
gogo	18	16
gogo	20	3
total	139	86	225	0.382222
fmi	38	5
fmi	24	6
fmi	25	3
fmi	14	4
fmi	27	1
fmi	32	4
fmi	33	3
	193	26	219	0.118721
DRI	11	29
DRI	13	36
DRI	6	43
DRI	11	29
DRI	14	31
DRI	7	35
	62	203	265	0.766038
