# Supplementary material for: Glial insulin regulates cooperative or antagonistic Golden goal/Flamingo interactions during photoreceptor axon guidance
Source: eLife. 2021 Mar 5;10:e66718. doi: 10.7554/eLife.66718 (PMC7987344; doi:10.7554/eLife.66718)
Supplement: Figure 3—source data 2. [file elife-66718-fig3-data2.xlsx]

## Sheet: Sheet1
WT	M3	M1		gogo-	M3	M1		fmi-	M3	M1		UAS-Gogo	M3	M1
1	24	1		1	18	4		1	1	17		1	5	16
	22	2			23	1			0	24			6	19
2	22	1		2	21	3		2	0	19		2	4	20
	22	0			20	3			1	20			5	21
3	21	1		3	22	0		3	0	24		3	3	18
	20	1			21	1			0	21			0	21
4	21	3		4	15	7		4	0	20		4	0	21
	21	4			17	4			0	20			4	19
5	23	0		5	17	6		5	2	20
	21	2			14	7			0	22
計	217	15			188	36			4	207			27	155
		WT (n=5, 232 axons)				gogo LOF (n=5, 224)				fmi LOF (n=5, 211)				UAS-Gogo (n=5, 182)
		0.0646552				0.160714				0.981043				0.851648
