# Supplementary material for: Glial insulin regulates cooperative or antagonistic Golden goal/Flamingo interactions during photoreceptor axon guidance
Source: eLife. 2021 Mar 5;10:e66718. doi: 10.7554/eLife.66718 (PMC7987344; doi:10.7554/eLife.66718)
Supplement: Figure 3—source data 3. [file elife-66718-fig3-data3.xlsx]

## Sheet: Sheet1
							+Fmi +Gogo (n=5, 486)	+Fmi gogoRNAi (n=4, 548)	+Fmi (n=4, 528)	+Gogo (n=4, 480)	gogoRNAi (n=4, 479)	WT (n=4, 565 axons))
						〜5	371	6	117	475	468	562
						5〜15	97	74	239	5	11	3
						15〜	18	468	172	0	0	0
						total	486	548	528	480		565
							0.763374	0.0109489	0.221591
							0.199588	0.135036	0.452652
							0.037037	0.854015	0.325758
						x2	322.811	325.279
						p	7.99028e-71	2.32553e-71

## Sheet: gogoRNAi
Item	Source	Length xyz	Length xy	Height	ND.T	ND.Z	ND.M	Comment		Item	Source	Length xyz	Length xy	Height	ND.T	ND.Z	ND.M	Comment		Item	Source	Length xyz	Length xy	Height	ND.T	ND.Z	ND.M	Comment		Item	Source	Length xyz	Length xy	Height	ND.T	ND.Z	ND.M	Comment
1	25do p24h_1-1.nd2	0.1387	0.1387	0.0026	0	0	0			1	25do p24h_2-1.nd2	3.0433	3.0433	0.0005	0	0	0			1	25do p24h_3-1.nd2	2.5042	2.4816	0.3355	0	0	0			1	25do p24h_4-1.nd2	2.5134	2.4324	0.6328	0	0	0
2	25do p24h_1-1.nd2	0	0	0	0	0	0			2	25do p24h_2-1.nd2	2.1268	1.8845	0.9858	0	0	0			2	25do p24h_3-1.nd2	3.0539	3.0539	0.0064	0	0	0			2	25do p24h_4-1.nd2	2.9997	2.0408	2.1985	0	0	0
3	25do p24h_1-1.nd2	0	0	0	0	0	0			3	25do p24h_2-1.nd2	0	0	0	0	0	0			3	25do p24h_3-1.nd2	3.345	3.345	0.0002	0	0	0			3	25do p24h_4-1.nd2	1.2932	1.2565	0.3057	0	0	0
4	25do p24h_1-1.nd2	0.3976	0.285	0.2772	0	0	0			4	25do p24h_2-1.nd2	1.1436	1.1436	0.0004	0	0	0			4	25do p24h_3-1.nd2	1.3657	1.3657	0.0003	0	0	0			4	25do p24h_4-1.nd2	0.7423	0.4232	0.6099	0	0	0
5	25do p24h_1-1.nd2	0.5219	0.5219	0.0043	0	0	0			5	25do p24h_2-1.nd2	0.9133	0.9133	0.0002	0	0	0			5	25do p24h_3-1.nd2	0.4111	0.4111	0.0001	0	0	0			5	25do p24h_4-1.nd2	1.6998	1.6998	0.0004	0	0	0
6	25do p24h_1-1.nd2	0.7015	0.6454	0.2747	0	0	0			6	25do p24h_2-1.nd2	1.0929	1.0929	0.0003	0	0	0			6	25do p24h_3-1.nd2	0.5442	0.5442	0.0003	0	0	0			6	25do p24h_4-1.nd2	0.9101	0.9101	0.0001	0	0	0
7	25do p24h_1-1.nd2	0.499	0.4168	0.2744	0	0	0			7	25do p24h_2-1.nd2	0.3786	0.3786	0.0001	0	0	0			7	25do p24h_3-1.nd2	2.058	2.058	0.0011	0	0	0			7	25do p24h_4-1.nd2	0.8469	0.7811	0.3274	0	0	0
8	25do p24h_1-1.nd2	0.1642	0.0213	0.1628	0	0	0			8	25do p24h_2-1.nd2	3.5604	1.4032	3.2722	0	0	0			8	25do p24h_3-1.nd2	1.7606	1.7606	0.0007	0	0	0			8	25do p24h_4-1.nd2	2.2356	2.2124	0.3211	0	0	0
9	25do p24h_1-1.nd2	0.4725	0.4725	0.0022	0	0	0			9	25do p24h_2-1.nd2	4.7229	4.7229	0.0006	0	0	0			9	25do p24h_3-1.nd2	0.6132	0.5188	0.3268	0	0	0			9	25do p24h_4-1.nd2	0.7068	0.7068	0.0001	0	0	0
10	25do p24h_1-1.nd2	1.9671	1.7124	0.9681	0	0	0			10	25do p24h_2-1.nd2	1.8643	1.8643	0.0002	0	0	0			10	25do p24h_3-1.nd2	2.1114	2.1114	0.0002	0	0	0			10	25do p24h_4-1.nd2	1.1183	1.1183	0.001	0	0	0
11	25do p24h_1-1.nd2	0.7409	0.7409	0.0002	0	0	0			11	25do p24h_2-1.nd2	0.1992	0.1992	0	0	0	0			11	25do p24h_3-1.nd2	0.1631	0.1631	0.0001	0	0	0			11	25do p24h_4-1.nd2	2.099	1.414	1.5513	0	0	0
12	25do p24h_1-1.nd2	1.2885	1.1267	0.6251	0	0	0			12	25do p24h_2-1.nd2	1.4524	1.4524	0.0001	0	0	0			12	25do p24h_3-1.nd2	4.4703	4.4703	0.0007	0	0	0			12	25do p24h_4-1.nd2	2.0699	2.0463	0.3114	0	0	0
13	25do p24h_1-1.nd2	1.5298	1.5298	0.0043	0	0	0			13	25do p24h_2-1.nd2	0.8761	0.8127	0.3273	0	0	0			13	25do p24h_3-1.nd2	2.2939	1.856	1.3481	0	0	0			13	25do p24h_4-1.nd2	2.0935	2.0935	0.0017	0	0	0
14	25do p24h_1-1.nd2	2.5219	2.3353	0.9521	0	0	0			14	25do p24h_2-1.nd2	2.3486	2.1307	0.9878	0	0	0			14	25do p24h_3-1.nd2	0.5617	0.1408	0.5438	0	0	0			14	25do p24h_4-1.nd2	1.0141	0.9611	0.3236	0	0	0
15	25do p24h_1-1.nd2	1.8265	1.8265	2e-05	0	0	0			15	25do p24h_2-1.nd2	2.1519	1.9134	0.9847	0	0	0			15	25do p24h_3-1.nd2	2.936	2.5945	1.3742	0	0	0			15	25do p24h_4-1.nd2	1.0633	1.0631	0.02	0	0	0
16	25do p24h_1-1.nd2	2.3632	2.3632	0.0003	0	0	0			16	25do p24h_2-1.nd2	1.0131	1.0131	0.0047	0	0	0			16	25do p24h_3-1.nd2	0.5423	0.0582	0.5391	0	0	0			16	25do p24h_4-1.nd2	0.7504	0.6776	0.3224	0	0	0
17	25do p24h_1-1.nd2	2.0769	1.8735	0.8964	0	0	0			17	25do p24h_2-1.nd2	1.9651	1.8482	0.6677	0	0	0			17	25do p24h_3-1.nd2	0.56	0.1472	0.5403	0	0	0			17	25do p24h_4-1.nd2	1.3667	1.23	0.5959	0	0	0
18	25do p24h_1-1.nd2	1.1133	0.908	0.6441	0	0	0			18	25do p24h_2-1.nd2	5.4154	5.2682	1.2538	0	0	0			18	25do p24h_3-1.nd2	2.2364	1.2402	1.861	0	0	0			18	25do p24h_4-1.nd2	1.5437	0.8344	1.2988	0	0	0
19	25do p24h_1-1.nd2	0.5747	0.2176	0.5319	0	0	0			19	25do p24h_2-1.nd2	2.0536	0.0938	2.0515	0	0	0			19	25do p24h_3-1.nd2	0.85	0.6784	0.5121	0	0	0			19	25do p24h_4-1.nd2	2.8626	1.3347	2.5324	0	0	0
20	25do p24h_1-1.nd2	0.2781	0.089	0.2635	0	0	0			20	25do p24h_2-1.nd2	0	0	0	0	0	0			20	25do p24h_3-1.nd2	1.6916	1.2486	1.1414	0	0	0			20	25do p24h_4-1.nd2	1.3194	1.2798	0.3207	0	0	0
21	25do p24h_1-1.nd2	1.8416	1.8257	0.2415	0	0	0			21	25do p24h_2-1.nd2	0	0	0	0	0	0			21	25do p24h_3-1.nd2	0.3094	0.3094	0.0001	0	0	0			21	25do p24h_4-1.nd2	0.0474	0.0474	0.0004	0	0	0
22	25do p24h_1-1.nd2	2.2007	2.11	0.6254	0	0	0			22	25do p24h_2-1.nd2	0	0	0	0	0	0			22	25do p24h_3-1.nd2	1.248	1.248	0.0018	0	0	0			22	25do p24h_4-1.nd2	2.4934	2.4934	0.001	0	0	0
23	25do p24h_1-1.nd2	1.8759	0.3828	1.8365	0	0	0			23	25do p24h_2-1.nd2	3.4136	3.4028	0.2705	0	0	0			23	25do p24h_3-1.nd2	0	0	0	0	0	0			23	25do p24h_4-1.nd2	0	0	0	0	0	0
24	25do p24h_1-1.nd2	0.6342	0.1474	0.6169	0	0	0			24	25do p24h_2-1.nd2	0.9297	0.9297	0.001	0	0	0			24	25do p24h_3-1.nd2	0	0	0	0	0	0			24	25do p24h_4-1.nd2	1.8604	1.3943	1.2317	0	0	0
25	25do p24h_1-1.nd2	0.375	0.375	0.0025	0	0	0			25	25do p24h_2-1.nd2	0	0	0	0	0	0			25	25do p24h_3-1.nd2	0	0	0	0	0	0			25	25do p24h_4-1.nd2	1.134	1.134	0.0003	0	0	0
26	25do p24h_1-1.nd2	0.1938	0.1938	0.0019	0	0	0			26	25do p24h_2-1.nd2	0.8671	0.6843	0.5325	0	0	0			26	25do p24h_3-1.nd2	0	0	0	0	0	0			26	25do p24h_4-1.nd2	0.6477	0.2606	0.5929	0	0	0
27	25do p24h_1-1.nd2	1.0077	0.4871	0.8822	0	0	0			27	25do p24h_2-1.nd2	1.0491	0.689	0.7912	0	0	0			27	25do p24h_3-1.nd2	0.8549	0.8549	0.0017	0	0	0			27	25do p24h_4-1.nd2	1.4814	1.1735	0.9042	0	0	0
28	25do p24h_1-1.nd2	0.3285	0.1245	0.304	0	0	0			28	25do p24h_2-1.nd2	0.5744	0.5744	0.0005	0	0	0			28	25do p24h_3-1.nd2	0.5682	0.5453	0.1598	0	0	0			28	25do p24h_4-1.nd2	0.6616	0.6615	0.0118	0	0	0
29	25do p24h_1-1.nd2	1.1285	1.0167	0.4897	0	0	0			29	25do p24h_2-1.nd2	0.5854	0.2629	0.5231	0	0	0			29	25do p24h_3-1.nd2	0	0	0	0	0	0			29	25do p24h_4-1.nd2	2.3131	2.3119	0.074	0	0	0
30	25do p24h_1-1.nd2	1.1354	1.1275	0.1334	0	0	0			30	25do p24h_2-1.nd2	0	0	0	0	0	0			30	25do p24h_3-1.nd2	0	0	0	0	0	0			30	25do p24h_4-1.nd2	3.5504	3.196	1.5463	0	0	0
31	25do p24h_1-2.nd2	0	0	0	0	0	0			31	25do p24h_2-2.nd2	3.1258	3.1258	0.0009	0	0	0			31	25do p24h_3-2.nd2	1.0492	1.0491	0.0098	0	0	0			31	25do p24h_4-2.nd2	1.2265	1.2265	0.0001	0	0	0
32	25do p24h_1-2.nd2	0	0	0	0	0	0			32	25do p24h_2-2.nd2	1.3015	0.9061	0.9342	0	0	0			32	25do p24h_3-2.nd2	1.5523	1.5179	0.3248	0	0	0			32	25do p24h_4-2.nd2	3.7553	2.6775	2.6332	0	0	0
33	25do p24h_1-2.nd2	0.0423	0.0423	4e-05	0	0	0			33	25do p24h_2-2.nd2	0.3155	0.3155	0.0001	0	0	0			33	25do p24h_3-2.nd2	1.6349	1.6349	0.0007	0	0	0			33	25do p24h_4-2.nd2	0.2453	0.2453	0.0011	0	0	0
34	25do p24h_1-2.nd2	0.1699	0.1699	0.0002	0	0	0			34	25do p24h_2-2.nd2	0	0	0	0	0	0			34	25do p24h_3-2.nd2	1.8845	1.8845	0.0005	0	0	0			34	25do p24h_4-2.nd2	0.4748	0.4748	0.0001	0	0	0
35	25do p24h_1-2.nd2	0.3608	0.1625	0.3221	0	0	0			35	25do p24h_2-2.nd2	0.5681	0.5681	0.0004	0	0	0			35	25do p24h_3-2.nd2	0.9489	0.9489	0.0003	0	0	0			35	25do p24h_4-2.nd2	0.7532	0.7532	0.0002	0	0	0
36	25do p24h_1-2.nd2	0.7324	0.7324	0.0001	0	0	0			36	25do p24h_2-2.nd2	2.806	2.7885	0.3126	0	0	0			36	25do p24h_3-2.nd2	0.4477	0.3061	0.3267	0	0	0			36	25do p24h_4-2.nd2	0.9446	0.6813	0.6543	0	0	0
37	25do p24h_1-2.nd2	1.0154	1.0154	2e-05	0	0	0			37	25do p24h_2-2.nd2	2.0537	1.9605	0.6114	0	0	0			37	25do p24h_3-2.nd2	1.2926	1.1144	0.6548	0	0	0			37	25do p24h_4-2.nd2	1.406	1.406	0.0004	0	0	0
38	25do p24h_1-2.nd2	0.7244	0.7244	0.0001	0	0	0			38	25do p24h_2-2.nd2	2.1586	2.1584	0.0272	0	0	0			38	25do p24h_3-2.nd2	0	0	0	0	0	0			38	25do p24h_4-2.nd2	1.0217	0.967	0.3298	0	0	0
39	25do p24h_1-2.nd2	1.2227	1.2227	0.0007	0	0	0			39	25do p24h_2-2.nd2	3.5244	1.685	3.0955	0	0	0			39	25do p24h_3-2.nd2	2.0473	1.2669	1.6082	0	0	0			39	25do p24h_4-2.nd2	2.0219	2.0219	0.001	0	0	0
40	25do p24h_1-2.nd2	2.1414	2.1414	0.0006	0	0	0			40	25do p24h_2-2.nd2	3.0156	2.7524	1.2321	0	0	0			40	25do p24h_3-2.nd2	0.8568	0.7892	0.3337	0	0	0			40	25do p24h_4-2.nd2	1.2407	1.2406	0.0148	0	0	0
41	25do p24h_1-2.nd2	0.7699	0.6987	0.3234	0	0	0			41	25do p24h_2-2.nd2	1.9532	1.9323	0.2848	0	0	0			41	25do p24h_3-2.nd2	3.0807	3.0807	0.0036	0	0	0			41	25do p24h_4-2.nd2	0.0601	0.0601	0.0004	0	0	0
42	25do p24h_1-2.nd2	0.5081	0.3943	0.3204	0	0	0			42	25do p24h_2-2.nd2	2.5476	1.7296	1.8705	0	0	0			42	25do p24h_3-2.nd2	0.2369	0.2369	0.0002	0	0	0			42	25do p24h_4-2.nd2	2.1138	2.1138	0.0008	0	0	0
43	25do p24h_1-2.nd2	0.6646	0.5812	0.3223	0	0	0			43	25do p24h_2-2.nd2	0.074	0.074	3e-05	0	0	0			43	25do p24h_3-2.nd2	0.0592	0.0592	4e-05	0	0	0			43	25do p24h_4-2.nd2	0.8676	0.5733	0.6512	0	0	0
44	25do p24h_1-2.nd2	0.6433	0.5581	0.3199	0	0	0			44	25do p24h_2-2.nd2	0.9575	0.9574	0.0139	0	0	0			44	25do p24h_3-2.nd2	0	0	0	0	0	0			44	25do p24h_4-2.nd2	1.4233	1.3859	0.3241	0	0	0
45	25do p24h_1-2.nd2	0.5172	0.403	0.3241	0	0	0			45	25do p24h_2-2.nd2	1.7373	0.7789	1.5529	0	0	0			45	25do p24h_3-2.nd2	0.1182	0.1182	0.0001	0	0	0			45	25do p24h_4-2.nd2	3.4906	3.4906	0.0006	0	0	0
46	25do p24h_1-2.nd2	1.0253	0.7949	0.6476	0	0	0			46	25do p24h_2-2.nd2	0	0	0	0	0	0			46	25do p24h_3-2.nd2	2.1228	2.1228	0.0008	0	0	0			46	25do p24h_4-2.nd2	1.2395	1.2395	0.0002	0	0	0
47	25do p24h_1-2.nd2	3.8041	3.8036	0.0622	0	0	0			47	25do p24h_2-2.nd2	0	0	0	0	0	0			47	25do p24h_3-2.nd2	2.2292	2.0219	0.9387	0	0	0			47	25do p24h_4-2.nd2	0	0	0	0	0	0
48	25do p24h_1-2.nd2	0	0	0	0	0	0			48	25do p24h_2-2.nd2	2.4228	1.8595	1.5532	0	0	0			48	25do p24h_3-2.nd2	3.0381	2.6109	1.5535	0	0	0			48	25do p24h_4-2.nd2	0.0599	0.0599	0.0006	0	0	0
49	25do p24h_1-2.nd2	1.8215	1.738	0.545	0	0	0			49	25do p24h_2-2.nd2	0.8939	0.8939	0.0003	0	0	0			49	25do p24h_3-2.nd2	3.4064	3.4064	0.0038	0	0	0			49	25do p24h_4-2.nd2	2.1184	2.1184	0.0009	0	0	0
50	25do p24h_1-2.nd2	2.5751	2.2103	1.3212	0	0	0			50	25do p24h_2-2.nd2	1.5208	1.2024	0.9312	0	0	0			50	25do p24h_3-2.nd2	1.2874	0.887	0.933	0	0	0			50	25do p24h_4-2.nd2	2.1939	2.1939	0.0001	0	0	0
51	25do p24h_1-2.nd2	4.5188	3.8436	2.3762	0	0	0			51	25do p24h_2-2.nd2	2.1935	1.1384	1.8749	0	0	0			51	25do p24h_3-2.nd2	0.0604	0.0604	0.0001	0	0	0			51	25do p24h_4-2.nd2	1.1544	1.1107	0.3146	0	0	0
52	25do p24h_1-2.nd2	2.1271	2.1271	0.0032	0	0	0			52	25do p24h_2-2.nd2	1.648	1.6183	0.3113	0	0	0			52	25do p24h_3-2.nd2	1.1145	1.0726	0.303	0	0	0			52	25do p24h_4-2.nd2	1.2266	1.1781	0.3415	0	0	0
53	25do p24h_1-2.nd2	0.8152	0.5729	0.58	0	0	0			53	25do p24h_2-2.nd2	1.6506	1.529	0.6218	0	0	0			53	25do p24h_3-2.nd2	1.5967	1.5637	0.3229	0	0	0			53	25do p24h_4-2.nd2	1.2672	0.8068	0.9771	0	0	0
54	25do p24h_1-2.nd2	0.6677	0.2569	0.6163	0	0	0			54	25do p24h_2-2.nd2	2.2243	2.0176	0.9364	0	0	0			54	25do p24h_3-2.nd2	2.1748	2.1504	0.3244	0	0	0			54	25do p24h_4-2.nd2	5.9281	2.5885	5.3331	0	0	0
55	25do p24h_1-2.nd2	2.5549	2.0092	1.5781	0	0	0			55	25do p24h_2-2.nd2	0.782	0.718	0.3098	0	0	0			55	25do p24h_3-2.nd2	1.4991	1.4991	0.0006	0	0	0			55	25do p24h_4-2.nd2	2.808	2.808	0.0046	0	0	0
56	25do p24h_1-2.nd2	0.5574	0.2154	0.5142	0	0	0			56	25do p24h_2-2.nd2	1.6741	1.6741	0	0	0	0			56	25do p24h_3-2.nd2	2.3689	2.3689	0.0015	0	0	0			56	25do p24h_4-2.nd2	1.0869	0.6563	0.8663	0	0	0
57	25do p24h_1-2.nd2	2.0744	2.0091	0.5164	0	0	0			57	25do p24h_2-2.nd2	1.7806	1.7806	0.0001	0	0	0			57	25do p24h_3-2.nd2	0.996	0.996	0.0002	0	0	0			57	25do p24h_4-2.nd2	0.5495	0.5495	0.0032	0	0	0
58	25do p24h_1-2.nd2	1.9578	1.8777	0.5543	0	0	0			58	25do p24h_2-2.nd2	0.9535	0.9535	3e-05	0	0	0			58	25do p24h_3-2.nd2	0	0	0	0	0	0			58	25do p24h_4-2.nd2	1.0488	0.4821	0.9314	0	0	0
59	25do p24h_1-2.nd2	1.044	0.9209	0.4918	0	0	0			59	25do p24h_2-2.nd2	2.7172	1.6787	2.1367	0	0	0			59	25do p24h_3-2.nd2	3.5604	3.5604	0.0034	0	0	0			59	25do p24h_4-2.nd2	0.7507	0.7507	0.0008	0	0	0
60	25do p24h_1-2.nd2	0.8905	0.737	0.4998	0	0	0			60	25do p24h_2-2.nd2	1.6458	1.624	0.2674	0	0	0			60	25do p24h_3-2.nd2	3.9178	3.9059	0.305	0	0	0			90	25do p24h_4-2.nd2	2.0958	1.9905	0.6559	0	0	0
61	25do p24h_1-3.nd2	2.8576	2.8576	0.0011	0	0	0			61	25do p24h_2-3.nd2	1.0704	1.0704	0.0002	0	0	0			61	25do p24h_3-3.nd2	5.1901	5.1901	0.0043	0	0	0			60	25do p24h_4-3.nd2	0.2564	0.2564	0.0001	0	0	0
62	25do p24h_1-3.nd2	2.9328	2.4449	1.6198	0	0	0			62	25do p24h_2-3.nd2	3.1221	3.1048	0.3275	0	0	0			62	25do p24h_3-3.nd2	2.5252	2.3466	0.9327	0	0	0			61	25do p24h_4-3.nd2	0.2686	0.2686	0.0002	0	0	0
63	25do p24h_1-3.nd2	2.2158	2.2158	0.0007	0	0	0			63	25do p24h_2-3.nd2	4.9249	2.4922	4.2478	0	0	0			63	25do p24h_3-3.nd2	2.0028	1.9834	0.2781	0	0	0			62	25do p24h_4-3.nd2	2.8625	1.2448	2.5777	0	0	0
64	25do p24h_1-3.nd2	3.3924	3.3924	0.0015	0	0	0			64	25do p24h_2-3.nd2	0.8056	0.8056	0.0003	0	0	0			64	25do p24h_3-3.nd2	1.0782	1.0782	0.0001	0	0	0			63	25do p24h_4-3.nd2	1.0231	0.9688	0.3289	0	0	0
65	25do p24h_1-3.nd2	2.2312	2.2312	0.0016	0	0	0			65	25do p24h_2-3.nd2	1.3491	1.309	0.3262	0	0	0			65	25do p24h_3-3.nd2	1.2975	1.2973	0.0238	0	0	0			64	25do p24h_4-3.nd2	2.961	2.8051	0.9482	0	0	0
66	25do p24h_1-3.nd2	0.5359	0.5359	0.0003	0	0	0			66	25do p24h_2-3.nd2	2.5851	2.3848	0.9975	0	0	0			66	25do p24h_3-3.nd2	4.1525	3.3338	2.4758	0	0	0			65	25do p24h_4-3.nd2	0	0	0	0	0	0
67	25do p24h_1-3.nd2	1.7928	1.7928	0.0012	0	0	0			67	25do p24h_2-3.nd2	2.0254	2.0252	0.0289	0	0	0			67	25do p24h_3-3.nd2	1.9146	1.888	0.3176	0	0	0			66	25do p24h_4-3.nd2	0.6274	0.6274	0.0003	0	0	0
68	25do p24h_1-3.nd2	0.7394	0.7394	0.0004	0	0	0			68	25do p24h_2-3.nd2	1.3501	1.3499	0.022	0	0	0			68	25do p24h_3-3.nd2	0	0	0	0	0	0			67	25do p24h_4-3.nd2	2.5482	2.5482	0.0057	0	0	0
69	25do p24h_1-3.nd2	0.5335	0.5335	0.0002	0	0	0			69	25do p24h_2-3.nd2	2.0363	2.0079	0.3389	0	0	0			69	25do p24h_3-3.nd2	1.4976	1.4976	0.0007	0	0	0			68	25do p24h_4-3.nd2	3.3229	3.1786	0.9685	0	0	0
70	25do p24h_1-3.nd2	0	0	0	0	0	0			70	25do p24h_2-3.nd2	3.6836	3.6167	0.6992	0	0	0			70	25do p24h_3-3.nd2	4.2938	2.9313	3.1375	0	0	0			69	25do p24h_4-3.nd2	1.3277	0.9241	0.9534	0	0	0
71	25do p24h_1-3.nd2	0	0	0	0	0	0			71	25do p24h_2-3.nd2	1.1431	1.1429	0.0191	0	0	0			71	25do p24h_3-3.nd2	1.1022	1.1022	0.0004	0	0	0			70	25do p24h_4-3.nd2	2.9359	2.9359	0.0006	0	0	0
72	25do p24h_1-3.nd2	3.3282	2.4659	2.2351	0	0	0			72	25do p24h_2-3.nd2	1.6453	1.6451	0.0245	0	0	0			72	25do p24h_3-3.nd2	0	0	0	0	0	0			71	25do p24h_4-3.nd2	6.2676	6.2676	0.0085	0	0	0
73	25do p24h_1-3.nd2	1.9347	1.8251	0.6421	0	0	0			73	25do p24h_2-3.nd2	2.0351	2.0351	0.0131	0	0	0			73	25do p24h_3-3.nd2	1.1389	1.1389	0.0016	0	0	0			72	25do p24h_4-3.nd2	0.7986	0.7986	0.0045	0	0	0
74	25do p24h_1-3.nd2	3.0835	3.0835	0.0031	0	0	0			74	25do p24h_2-3.nd2	2.8196	2.8195	0.0093	0	0	0			74	25do p24h_3-3.nd2	0.5913	0.5913	0.0003	0	0	0			73	25do p24h_4-3.nd2	4.3454	1.1396	4.1933	0	0	0
75	25do p24h_1-3.nd2	3.8373	3.8373	0.0029	0	0	0			75	25do p24h_2-3.nd2	0.7388	0.7388	0.0117	0	0	0			75	25do p24h_3-3.nd2	0	0	0	0	0	0			74	25do p24h_4-3.nd2	0	0	0	0	0	0
76	25do p24h_1-3.nd2	3.2879	3.2738	0.3047	0	0	0			76	25do p24h_2-3.nd2	2.3758	2.1604	0.9884	0	0	0			76	25do p24h_3-3.nd2	0.4567	0.4567	0.0003	0	0	0			75	25do p24h_4-3.nd2	1.9766	1.7367	0.9439	0	0	0
77	25do p24h_1-3.nd2	3.9687	3.9687	0.0062	0	0	0			77	25do p24h_2-3.nd2	1.2019	1.1533	0.3383	0	0	0			77	25do p24h_3-3.nd2	2.6721	2.6721	0.0004	0	0	0			76	25do p24h_4-3.nd2	1.6228	1.0312	1.253	0	0	0
78	25do p24h_1-3.nd2	3.9255	3.9137	0.3044	0	0	0			78	25do p24h_2-3.nd2	3.6783	3.1064	1.9697	0	0	0			78	25do p24h_3-3.nd2	1.3305	1.3305	0.0007	0	0	0			77	25do p24h_4-3.nd2	3.6318	2.6245	2.5103	0	0	0
79	25do p24h_1-3.nd2	1.5613	1.2367	0.953	0	0	0			79	25do p24h_2-3.nd2	0	0	0	0	0	0			79	25do p24h_3-3.nd2	1.8919	1.8695	0.2905	0	0	0			78	25do p24h_4-3.nd2	2.3634	2.3634	0.0014	0	0	0
80	25do p24h_1-3.nd2	2.2352	2.2352	0.0013	0	0	0			80	25do p24h_2-3.nd2	0	0	0	0	0	0			80	25do p24h_3-3.nd2	0	0	0	0	0	0			79	25do p24h_4-3.nd2	2.5662	2.5662	0.0019	0	0	0
81	25do p24h_1-3.nd2	8.287	8.2815	0.3019	0	0	0			81	25do p24h_2-3.nd2	0.259	0.259	1e-05	0	0	0			81	25do p24h_3-3.nd2	3.5734	3.5713	0.1197	0	0	0			80	25do p24h_4-3.nd2	2.3198	2.1065	0.9717	0	0	0
82	25do p24h_1-3.nd2	4.0535	3.7571	1.5215	0	0	0			82	25do p24h_2-3.nd2	1.0815	0.9435	0.5286	0	0	0			82	25do p24h_3-3.nd2	0.7585	0.6874	0.3206	0	0	0			81	25do p24h_4-3.nd2	1.2085	1.2085	0.0013	0	0	0
83	25do p24h_1-3.nd2	1.2965	1.1418	0.6142	0	0	0			83	25do p24h_2-3.nd2	0	0	0	0	0	0			83	25do p24h_3-3.nd2	1.4057	1.4057	0.0011	0	0	0			82	25do p24h_4-3.nd2	2.6736	2.6554	0.3109	0	0	0
84	25do p24h_1-3.nd2	0	0	0	0	0	0			84	25do p24h_2-3.nd2	0	0	0	0	0	0			84	25do p24h_3-3.nd2	1.3404	1.3404	0.0001	0	0	0			83	25do p24h_4-3.nd2	1.8203	1.8203	0.0021	0	0	0
85	25do p24h_1-3.nd2	1.4573	1.1515	0.8932	0	0	0			85	25do p24h_2-3.nd2	0.5211	0.5211	0.0004	0	0	0			85	25do p24h_3-3.nd2	2.7584	2.7584	0.0018	0	0	0			84	25do p24h_4-3.nd2	7.3384	2.1011	7.0312	0	0	0
86	25do p24h_1-3.nd2	1.2548	1.103	0.5983	0	0	0			86	25do p24h_2-3.nd2	1.3625	1.3344	0.2754	0	0	0			86	25do p24h_3-3.nd2	0.7989	0.7989	0.0011	0	0	0			85	25do p24h_4-3.nd2	0	0	0	0	0	0
87	25do p24h_1-3.nd2	1.2458	1.2449	0.0473	0	0	0			87	25do p24h_2-3.nd2	0	0	0	0	0	0			87	25do p24h_3-3.nd2	0.7773	0.4752	0.615	0	0	0			86	25do p24h_4-3.nd2	1.492	1.3946	0.5302	0	0	0
88	25do p24h_1-3.nd2	0.051	0.0509	0.0038	0	0	0			88	25do p24h_2-3.nd2	0	0	0	0	0	0			88	25do p24h_3-3.nd2	0.3616	0.3616	0.0005	0	0	0			87	25do p24h_4-3.nd2	1.7587	1.7587	0.0037	0	0	0
89	25do p24h_1-3.nd2	0.0474	0.0474	0.0009	0	0	0			89	25do p24h_2-3.nd2	0.4002	0.4002	0.0002	0	0	0			89	25do p24h_3-3.nd2	2.2624	2.0565	0.9431	0	0	0			88	25do p24h_4-3.nd2	1.9611	1.9611	0.0041	0	0	0
90	25do p24h_1-3.nd2	0.2797	0.1197	0.2528	0	0	0			90	25do p24h_2-4.nd2	0.746	0.746	0.0002	0	0	0			90	25do p24h_3-3.nd2	2.8618	2.3819	1.5863	0	0	0			89	25do p24h_4-3.nd2	2.1671	1.9202	1.0046	0	0	0
91	25do p24h_1-4.nd2	2.6893	1.3229	2.3414	0	0	0			91	25do p24h_2-4.nd2	0.5279	0.5279	0.0002	0	0	0			91	25do p24h_3-4.nd2	2.152	2.0738	0.5748	0	0	0			91	25do p24h_4-4.nd2	1.3232	1.2977	0.2583	0	0	0
92	25do p24h_1-4.nd2	1.656	1.5461	0.5934	0	0	0			92	25do p24h_2-4.nd2	0.5624	0.5624	0.0002	0	0	0			92	25do p24h_3-4.nd2	2.2337	1.3963	1.7434	0	0	0			92	25do p24h_4-4.nd2	1.2431	1.2431	0.0105	0	0	0
93	25do p24h_1-4.nd2	3.9994	3.3366	2.2051	0	0	0			93	25do p24h_2-4.nd2	0.5286	0.5286	0.0002	0	0	0			93	25do p24h_3-4.nd2	1.0401	0.5827	0.8616	0	0	0			93	25do p24h_4-4.nd2	1.6498	1.1609	1.1723	0	0	0
94	25do p24h_1-4.nd2	7.6108	6.9902	3.0101	0	0	0			94	25do p24h_2-4.nd2	0	0	0	0	0	0			94	25do p24h_3-4.nd2	1.4167	1.1322	0.8516	0	0	0			94	25do p24h_4-4.nd2	1.0298	0.8396	0.5962	0	0	0
95	25do p24h_1-4.nd2	3.5628	3.5544	0.2451	0	0	0			95	25do p24h_2-4.nd2	2.2634	2.1762	0.622	0	0	0			95	25do p24h_3-4.nd2	1.9892	1.795	0.8571	0	0	0			95	25do p24h_4-4.nd2	0.2992	0.2992	0.0002	0	0	0
96	25do p24h_1-4.nd2	0.712	0.4915	0.5152	0	0	0			96	25do p24h_2-4.nd2	2.5661	2.2438	1.2451	0	0	0			96	25do p24h_3-4.nd2	2.1142	2.1142	0.0006	0	0	0			96	25do p24h_4-4.nd2	1.1543	0.7296	0.8945	0	0	0
97	25do p24h_1-4.nd2	0.1477	0.1477	0.0002	0	0	0			97	25do p24h_2-4.nd2	3.8	2.8626	2.499	0	0	0			97	25do p24h_3-4.nd2	4.0964	3.6976	1.7631	0	0	0			97	25do p24h_4-4.nd2	0	0	0	0	0	0
98	25do p24h_1-4.nd2	4.2353	1.3818	4.0035	0	0	0			98	25do p24h_2-4.nd2	1.5413	1.5413	0.0004	0	0	0			98	25do p24h_3-4.nd2	0	0	0	0	0	0			98	25do p24h_4-4.nd2	2.5739	1.0571	2.3468	0	0	0
99	25do p24h_1-4.nd2	5.6868	5.5684	1.1546	0	0	0			99	25do p24h_2-4.nd2	2.9469	2.7934	0.9388	0	0	0			99	25do p24h_3-4.nd2	1.3233	1.3233	0.0006	0	0	0			99	25do p24h_4-4.nd2	2.5697	2.5129	0.5372	0	0	0
100	25do p24h_1-4.nd2	3.3062	3.3062	0.0047	0	0	0			100	25do p24h_2-4.nd2	0.6721	0.2786	0.6116	0	0	0			100	25do p24h_3-4.nd2	0	0	0	0	0	0			100	25do p24h_4-4.nd2	0.9245	0.8816	0.2784	0	0	0
101	25do p24h_1-4.nd2	0.7882	0.5681	0.5463	0	0	0			101	25do p24h_2-4.nd2	1.3595	1.2153	0.6095	0	0	0			101	25do p24h_3-4.nd2	5.3528	1.0599	5.2468	0	0	0			101	25do p24h_4-4.nd2	0.5714	0.5713	0.0057	0	0	0
102	25do p24h_1-4.nd2	2.3785	0.8869	2.2069	0	0	0			102	25do p24h_2-4.nd2	0.475	0.475	0.0001	0	0	0			102	25do p24h_3-4.nd2	2.0554	1.6982	1.1579	0	0	0			102	25do p24h_4-4.nd2	2.094	1.1171	1.7712	0	0	0
103	25do p24h_1-4.nd2	2.2509	1.1902	1.9105	0	0	0			103	25do p24h_2-4.nd2	0.564	0.564	0.0004	0	0	0			103	25do p24h_3-4.nd2	2.7779	2.1391	1.7722	0	0	0			103	25do p24h_4-4.nd2	3.6803	3.6463	0.4997	0	0	0
104	25do p24h_1-4.nd2	1.766	1.3867	1.0936	0	0	0			104	25do p24h_2-4.nd2	2.3195	2.2395	0.6037	0	0	0			104	25do p24h_3-4.nd2	1.871	1.6549	0.8729	0	0	0			104	25do p24h_4-4.nd2	1.7465	1.5273	0.8471	0	0	0
105	25do p24h_1-4.nd2	2.0393	2.0393	0.003	0	0	0			105	25do p24h_2-4.nd2	0.7917	0.7321	0.3013	0	0	0			105	25do p24h_3-4.nd2	3.401	1.7006	2.9454	0	0	0			105	25do p24h_4-4.nd2	6.4865	6.4865	0.0028	0	0	0
106	25do p24h_1-4.nd2	0.8337	0.1933	0.811	0	0	0			106	25do p24h_2-4.nd2	1.0539	1.0536	0.0236	0	0	0			106	25do p24h_3-4.nd2	6.2734	2.8784	5.5741	0	0	0			106	25do p24h_4-4.nd2	2.9922	2.977	0.3012	0	0	0
107	25do p24h_1-4.nd2	0.0594	0.0594	0.0025	0	0	0			107	25do p24h_2-4.nd2	2.501	2.4904	0.2302	0	0	0			107	25do p24h_3-4.nd2	3.3955	3.3955	0.0014	0	0	0			107	25do p24h_4-4.nd2	1.5572	1.5283	0.2987	0	0	0
108	25do p24h_1-4.nd2	0.0569	0.0569	0.0001	0	0	0			108	25do p24h_2-4.nd2	0	0	0	0	0	0			108	25do p24h_3-4.nd2	0.9243	0.2952	0.8759	0	0	0			108	25do p24h_4-4.nd2	1.5358	1.2444	0.9001	0	0	0
109	25do p24h_1-4.nd2	0.8042	0.6158	0.5172	0	0	0			109	25do p24h_2-4.nd2	0.2539	0.2539	0.0002	0	0	0			109	25do p24h_3-4.nd2	4.0954	2.4726	3.2648	0	0	0			109	25do p24h_4-4.nd2	1.1162	1.1162	0.0018	0	0	0
110	25do p24h_1-4.nd2	1.8406	1.8406	0.0022	0	0	0			110	25do p24h_2-4.nd2	0	0	0	0	0	0			110	25do p24h_3-4.nd2	2.1055	2.0269	0.5698	0	0	0			110	25do p24h_4-4.nd2	1.9534	1.5487	1.1905	0	0	0
111	25do p24h_1-4.nd2	2.384	1.1473	2.0898	0	0	0			111	25do p24h_2-4.nd2	0	0	0	0	0	0			111	25do p24h_3-4.nd2	3.7196	2.2638	2.9514	0	0	0			111	25do p24h_4-4.nd2	1.2389	1.2025	0.298	0	0	0
112	25do p24h_1-4.nd2	1.8304	1.8304	0.0026	0	0	0			112	25do p24h_2-4.nd2	0	0	0	0	0	0			112	25do p24h_3-4.nd2	2.1957	2.0099	0.8841	0	0	0			112	25do p24h_4-4.nd2	0.7634	0.7634	0.0004	0	0	0
113	25do p24h_1-4.nd2	3.2393	3.2248	0.3055	0	0	0			113	25do p24h_2-4.nd2	1.3299	1.3299	0.0007	0	0	0			113	25do p24h_3-4.nd2	2.0352	2.0352	0.0034	0	0	0			113	25do p24h_4-4.nd2	2.7278	2.7117	0.296	0	0	0
114	25do p24h_1-4.nd2	2.2221	2.2221	0.001	0	0	0			114	25do p24h_2-4.nd2	0	0	0	0	0	0			114	25do p24h_3-4.nd2	1.7092	1.7092	0.0004	0	0	0			114	25do p24h_4-4.nd2	1.2613	1.2431	0.2133	0	0	0
115	25do p24h_1-4.nd2	4.7858	4.7858	0.003	0	0	0			115	25do p24h_2-4.nd2	2.0159	0.8712	1.818	0	0	0			115	25do p24h_3-4.nd2	1.1706	1.1706	0.0088	0	0	0			115	25do p24h_4-4.nd2	0.1649	0.1649	0.0004	0	0	0
116	25do p24h_1-4.nd2	3.4248	3.3705	0.6075	0	0	0			116	25do p24h_2-4.nd2	1.2518	1.2517	0.0071	0	0	0			116	25do p24h_3-4.nd2	2.5111	2.4937	0.2955	0	0	0			116	25do p24h_4-4.nd2	0.514	0.514	0.0005	0	0	0
117	25do p24h_1-4.nd2	2.1163	1.9167	0.8974	0	0	0			117	25do p24h_2-4.nd2	0.3177	0.088	0.3052	0	0	0			117	25do p24h_3-4.nd2	3.5795	3.2617	1.4744	0	0	0			117	25do p24h_4-4.nd2	0.6848	0.653	0.2063	0	0	0
118	25do p24h_1-4.nd2	0.5128	0.4138	0.3028	0	0	0			118	25do p24h_2-4.nd2	0.2387	0.2387	0.0017	0	0	0			118	25do p24h_3-4.nd2	1.7624	1.7624	0.0002	0	0	0			118	25do p24h_4-4.nd2	3.7844	3.7844	0.0014	0	0	0
119	25do p24h_1-4.nd2	0.8996	0.0884	0.8952	0	0	0			119	25do p24h_2-4.nd2	2.444	2.4287	0.2729	0	0	0			119	25do p24h_3-4.nd2	2.3599	2.3477	0.2391	0	0	0			119	25do p24h_4-4.nd2	0	0	0	0	0	0
120	25do p24h_1-4.nd2	1.8355	1.8046	0.3351	0	0	0			Feature	Mean	St.Dev	Minimum	Maximum						120	25do p24h_3-4.nd2	1.7915	1.7915	0.0027	0	0	0			120	25do p24h_4-4.nd2	2.9482	2.9482	0.0019	0	0	0
Feature	Mean	St.Dev	Minimum	Maximum						Length xyz	1.4057	1.1969	0	5.4154						Feature	Mean	St.Dev	Minimum	Maximum						Feature	Mean	St.Dev	Minimum	Maximum
Length xyz	1.649	1.5063	0	8.287						Length xy	1.2274	1.0644	0	5.2682						Length xyz	1.6927	1.3261	0	6.2734						Length xyz	1.7087	1.3337	0	7.3384
Length xy	1.4479	1.4612	0	8.2815						Height	0.4437	0.7564	0	4.2478						Length xy	1.4689	1.127	0	5.1901						Length xy	1.4502	1.1056	0	6.4865
Height	0.5015	0.7109	0	4.0035																Height	0.5208	0.9617	0	5.5741						Height	0.5631	1.0277	0	7.0312

## Sheet: U-Gogo
Item	Source	Length xyz	Length xy	Height	ND.T	ND.Z	ND.M	Comment		Item	Source	Length xyz	Length xy	Height	ND.T	ND.Z	ND.M	Comment		Item	Source	Length xyz	Length xy	Height	ND.T	ND.Z	ND.M	Comment		Item	Source	Length xyz	Length xy	Height	ND.T	ND.Z	ND.M	Comment
1	25do p24h001_1-1.nd2	1.7713	1.7713	0.0033	0	0	0			1	25do p24h001_2-1.nd2	0	0	0	0	0	0			1	25do p24h001_3-1.nd2	3.9972	3.9972	0.0008	0	0	0			1	25do p24h001_4-1.nd2	4.3831	4.3673	0.3715	0	0	0
2	25do p24h001_1-1.nd2	0	0	0	0	0	0			2	25do p24h001_2-1.nd2	1.127	0.3747	1.0629	0	0	0			2	25do p24h001_3-1.nd2	0.6776	0.6776	1e-05	0	0	0			2	25do p24h001_4-1.nd2	3.9766	3.9069	0.7416	0	0	0
3	25do p24h001_1-1.nd2	0.3612	0.1261	0.3385	0	0	0			3	25do p24h001_2-1.nd2	0.8758	0.8758	0.0006	0	0	0			3	25do p24h001_3-1.nd2	1.3636	1.3636	0.0001	0	0	0			3	25do p24h001_4-1.nd2	2.1077	2.1077	0.0002	0	0	0
4	25do p24h001_1-1.nd2	0.4845	0.3497	0.3354	0	0	0			4	25do p24h001_2-1.nd2	1.6973	1.6638	0.3355	0	0	0			4	25do p24h001_3-1.nd2	1.0707	1.0707	0.0006	0	0	0			4	25do p24h001_4-1.nd2	1.4925	1.0101	1.0988	0	0	0
5	25do p24h001_1-1.nd2	1.4341	0.2945	1.4035	0	0	0			5	25do p24h001_2-1.nd2	1.8287	1.7085	0.652	0	0	0			5	25do p24h001_3-1.nd2	1.8221	1.8221	0.0006	0	0	0			5	25do p24h001_4-1.nd2	1.8018	1.7623	0.375	0	0	0
6	25do p24h001_1-1.nd2	0.4566	0.2921	0.3509	0	0	0			6	25do p24h001_2-1.nd2	1.817	1.7019	0.6363	0	0	0			6	25do p24h001_3-1.nd2	0	0	0	0	0	0			6	25do p24h001_4-1.nd2	0.7409	0.6409	0.3717	0	0	0
7	25do p24h001_1-1.nd2	0.0891	0.0891	0.0007	0	0	0			7	25do p24h001_2-1.nd2	0.8129	0.7415	0.333	0	0	0			7	25do p24h001_3-1.nd2	1.5987	1.5987	0.0002	0	0	0			7	25do p24h001_4-1.nd2	2.9017	1.854	2.2322	0	0	0
8	25do p24h001_1-1.nd2	1.0528	0.9926	0.3509	0	0	0			8	25do p24h001_2-1.nd2	1.4211	1.2541	0.6684	0	0	0			8	25do p24h001_3-1.nd2	2.4561	1.9602	1.4798	0	0	0			8	25do p24h001_4-1.nd2	3.5201	3.5201	0.0002	0	0	0
9	25do p24h001_1-1.nd2	0.8613	0.4834	0.7129	0	0	0			9	25do p24h001_2-1.nd2	1.9291	1.4144	1.3117	0	0	0			9	25do p24h001_3-1.nd2	2.0577	1.7449	1.0905	0	0	0			9	25do p24h001_4-1.nd2	2.4113	1.5609	1.8379	0	0	0
10	25do p24h001_1-1.nd2	0	0	0	0	0	0			10	25do p24h001_2-1.nd2	6.1133	6.0598	0.8065	0	0	0			10	25do p24h001_3-1.nd2	0	0	0	0	0	0			10	25do p24h001_4-1.nd2	0.633	0.633	0.0002	0	0	0
11	25do p24h001_1-1.nd2	1.0864	1.0286	0.3495	0	0	0			11	25do p24h001_2-1.nd2	0	0	0	0	0	0			11	25do p24h001_3-1.nd2	2.937	2.327	1.792	0	0	0			11	25do p24h001_4-1.nd2	0.1583	0.1583	0.0007	0	0	0
12	25do p24h001_1-1.nd2	0.1621	0.1621	0.0023	0	0	0			12	25do p24h001_2-1.nd2	0.3284	0.0518	0.3242	0	0	0			12	25do p24h001_3-1.nd2	3.1082	3.1082	0.0005	0	0	0			12	25do p24h001_4-1.nd2	1.237	0.5406	1.1126	0	0	0
13	25do p24h001_1-1.nd2	1.3252	1.3252	0.0018	0	0	0			13	25do p24h001_2-1.nd2	1.4251	1.4251	0.002	0	0	0			13	25do p24h001_3-1.nd2	1.0365	1.0365	0.0002	0	0	0			13	25do p24h001_4-1.nd2	0.7787	0.6832	0.3736	0	0	0
14	25do p24h001_1-1.nd2	0	0	0	0	0	0			14	25do p24h001_2-1.nd2	0.741	0.2395	0.7012	0	0	0			14	25do p24h001_3-1.nd2	0.9287	0.6456	0.6675	0	0	0			14	25do p24h001_4-1.nd2	1.0224	1.0224	0.0001	0	0	0
15	25do p24h001_1-1.nd2	0	0	0	0	0	0			15	25do p24h001_2-1.nd2	0.4084	0.4084	0.0001	0	0	0			15	25do p24h001_3-1.nd2	1.1454	1.1454	0.0002	0	0	0			15	25do p24h001_4-1.nd2	1.3987	1.3987	0.0007	0	0	0
16	25do p24h001_1-1.nd2	0.8315	0.8313	0.0158	0	0	0			16	25do p24h001_2-1.nd2	0	0	0	0	0	0			16	25do p24h001_3-1.nd2	0	0	0	0	0	0			16	25do p24h001_4-1.nd2	0	0	0	0	0	0
17	25do p24h001_1-1.nd2	0	0	0	0	0	0			17	25do p24h001_2-1.nd2	2.893	2.893	0.0002	0	0	0			17	25do p24h001_3-1.nd2	0.5737	0.5737	0.0001	0	0	0			17	25do p24h001_4-1.nd2	1.4167	1.364	0.3829	0	0	0
18	25do p24h001_1-1.nd2	0.1018	0.1018	0.0002	0	0	0			18	25do p24h001_2-1.nd2	2.9188	2.9188	0.0005	0	0	0			18	25do p24h001_3-1.nd2	1.0326	1.0326	0.0041	0	0	0			18	25do p24h001_4-1.nd2	0	0	0	0	0	0
19	25do p24h001_1-1.nd2	0.6619	0.3275	0.5752	0	0	0			19	25do p24h001_2-1.nd2	1.0406	0.973	0.3689	0	0	0			19	25do p24h001_3-1.nd2	0.4126	0.2139	0.3528	0	0	0			19	25do p24h001_4-1.nd2	2.1335	2.1335	0.0109	0	0	0
20	25do p24h001_1-1.nd2	0.2662	0.2662	0.0001	0	0	0			20	25do p24h001_2-1.nd2	2.3053	2.1792	0.752	0	0	0			20	25do p24h001_3-1.nd2	0.8024	0.3545	0.7199	0	0	0			20	25do p24h001_4-1.nd2	1.5025	1.3185	0.7205	0	0	0
21	25do p24h001_1-1.nd2	0	0	0	0	0	0			21	25do p24h001_2-1.nd2	0.9951	0.9951	0.0006	0	0	0			21	25do p24h001_3-1.nd2	0	0	0	0	0	0			21	25do p24h001_4-1.nd2	0	0	0	0	0	0
22	25do p24h001_1-1.nd2	0.2997	0.2996	0.0061	0	0	0			22	25do p24h001_2-1.nd2	0.852	0.852	0.0016	0	0	0			22	25do p24h001_3-1.nd2	0.7937	0.1151	0.7853	0	0	0			22	25do p24h001_4-1.nd2	1.4104	1.1951	0.7489	0	0	0
23	25do p24h001_1-1.nd2	0.2081	0.2081	0.0005	0	0	0			23	25do p24h001_2-1.nd2	0.7342	0.7341	0.0102	0	0	0			23	25do p24h001_3-1.nd2	5.4412	5.4383	0.1798	0	0	0			23	25do p24h001_4-1.nd2	0.0587	0.0587	1e-05	0	0	0
24	25do p24h001_1-1.nd2	0.6848	0.6848	0.0016	0	0	0			24	25do p24h001_2-1.nd2	1.2102	1.1526	0.369	0	0	0			24	25do p24h001_3-1.nd2	0	0	0	0	0	0			24	25do p24h001_4-1.nd2	0.067	0.0669	0.0031	0	0	0
25	25do p24h001_1-1.nd2	0.3931	0.3931	0.0009	0	0	0			25	25do p24h001_2-1.nd2	2.3672	2.3671	0.0224	0	0	0			25	25do p24h001_3-1.nd2	10.0643	4.384	9.0593	0	0	0			25	25do p24h001_4-1.nd2	0	0	0	0	0	0
26	25do p24h001_1-1.nd2	0.1513	0.1513	3e-05	0	0	0			26	25do p24h001_2-1.nd2	0.6508	0.6508	0.0078	0	0	0			26	25do p24h001_3-1.nd2	1.3329	1.2947	0.317	0	0	0			26	25do p24h001_4-1.nd2	2.4653	0.9152	2.2891	0	0	0
27	25do p24h001_1-1.nd2	0.1841	0.1841	0.0001	0	0	0			27	25do p24h001_2-1.nd2	0.5159	0.4549	0.2434	0	0	0			27	25do p24h001_3-1.nd2	4.4134	0.2221	4.4078	0	0	0			27	25do p24h001_4-1.nd2	0	0	0	0	0	0
28	25do p24h001_1-1.nd2	0.2804	0.2804	0.0007	0	0	0			28	25do p24h001_2-1.nd2	0.0531	0.0531	0	0	0	0			28	25do p24h001_3-1.nd2	0	0	0	0	0	0			28	25do p24h001_4-1.nd2	0.2423	0.2423	0.0003	0	0	0
29	25do p24h001_1-1.nd2	0.3457	0.3457	0.0008	0	0	0			29	25do p24h001_2-1.nd2	2.4916	2.4916	0.0059	0	0	0			29	25do p24h001_3-1.nd2	0	0	0	0	0	0			29	25do p24h001_4-1.nd2	1.1429	1.08	0.3737	0	0	0
30	25do p24h001_1-1.nd2	0.4945	0.3576	0.3416	0	0	0			30	25do p24h001_2-1.nd2	1.6667	1.0157	1.3214	0	0	0			30	25do p24h001_3-1.nd2	0	0	0	0	0	0			30	25do p24h001_4-1.nd2	0	0	0	0	0	0
31	25do p24h001_1-2.nd2	3.0745	3.0745	0.0004	0	0	0			31	25do p24h001_2-2.nd2	1.3382	1.3382	0.0006	0	0	0			31	25do p24h001_3-2.nd2	0.4018	0.1674	0.3653	0	0	0			31	25do p24h001_4-2.nd2	0.6494	0.5313	0.3734	0	0	0
32	25do p24h001_1-2.nd2	0.9132	0.9132	0.0004	0	0	0			32	25do p24h001_2-2.nd2	0.74	0.74	0.0001	0	0	0			32	25do p24h001_3-2.nd2	1.0735	0.1675	1.0604	0	0	0			32	25do p24h001_4-2.nd2	0.9905	0.9905	0.0001	0	0	0
33	25do p24h001_1-2.nd2	1.8077	1.8077	0.0009	0	0	0			33	25do p24h001_2-2.nd2	0.0498	0.0498	0.0001	0	0	0			33	25do p24h001_3-2.nd2	0.3963	0.3963	0.0011	0	0	0			33	25do p24h001_4-2.nd2	1.9592	1.9592	0.0003	0	0	0
34	25do p24h001_1-2.nd2	3.1983	1.2283	2.9531	0	0	0			34	25do p24h001_2-2.nd2	0	0	0	0	0	0			34	25do p24h001_3-2.nd2	1.1884	0.4307	1.1076	0	0	0			34	25do p24h001_4-2.nd2	0.8447	0.8447	0.0006	0	0	0
35	25do p24h001_1-2.nd2	0.7055	0.7055	0.0002	0	0	0			35	25do p24h001_2-2.nd2	0	0	0	0	0	0			35	25do p24h001_3-2.nd2	0.9158	0.5482	0.7335	0	0	0			35	25do p24h001_4-2.nd2	1.0036	1.0036	0.0001	0	0	0
36	25do p24h001_1-2.nd2	1.048	0.739	0.7431	0	0	0			36	25do p24h001_2-2.nd2	1.9979	1.3418	1.4803	0	0	0			36	25do p24h001_3-2.nd2	2.0751	2.0751	0.0038	0	0	0			36	25do p24h001_4-2.nd2	1.7011	1.3153	1.0789	0	0	0
37	25do p24h001_1-2.nd2	1.907	1.1931	1.4876	0	0	0			37	25do p24h001_2-2.nd2	1.592	0.5929	1.4774	0	0	0			37	25do p24h001_3-2.nd2	0.4457	0.4457	0.0001	0	0	0			37	25do p24h001_4-2.nd2	0.9607	0.6424	0.7143	0	0	0
38	25do p24h001_1-2.nd2	0.7359	0.0593	0.7335	0	0	0			38	25do p24h001_2-2.nd2	1.403	1.3586	0.3502	0	0	0			38	25do p24h001_3-2.nd2	0.3328	0.3328	0.0004	0	0	0			38	25do p24h001_4-2.nd2	0.701	0.701	0.0007	0	0	0
39	25do p24h001_1-2.nd2	0.0542	0.0542	3e-05	0	0	0			39	25do p24h001_2-2.nd2	3.8868	3.4618	1.7673	0	0	0			39	25do p24h001_3-2.nd2	0	0	0	0	0	0			39	25do p24h001_4-2.nd2	0	0	0	0	0	0
40	25do p24h001_1-2.nd2	0.0544	0.0544	2e-05	0	0	0			40	25do p24h001_2-2.nd2	0.8645	0.4728	0.7237	0	0	0			40	25do p24h001_3-2.nd2	0.4475	0.4475	0.0001	0	0	0			40	25do p24h001_4-2.nd2	0	0	0	0	0	0
41	25do p24h001_1-2.nd2	0.4153	0.4153	4e-05	0	0	0			41	25do p24h001_2-2.nd2	4.7285	1.1492	4.5868	0	0	0			41	25do p24h001_3-2.nd2	0	0	0	0	0	0			41	25do p24h001_4-2.nd2	0	0	0	0	0	0
42	25do p24h001_1-2.nd2	2.672	0.6816	2.5836	0	0	0			42	25do p24h001_2-2.nd2	1.3975	0.9087	1.0616	0	0	0			42	25do p24h001_3-2.nd2	3.4044	3.384	0.3719	0	0	0			42	25do p24h001_4-2.nd2	0	0	0	0	0	0
43	25do p24h001_1-2.nd2	0.4142	0.4142	0.0004	0	0	0			43	25do p24h001_2-2.nd2	3.0162	3.0021	0.2916	0	0	0			43	25do p24h001_3-2.nd2	0	0	0	0	0	0			43	25do p24h001_4-2.nd2	0.5272	0.5272	0.0016	0	0	0
44	25do p24h001_1-2.nd2	0.9519	0.6073	0.733	0	0	0			44	25do p24h001_2-2.nd2	1.8182	1.6594	0.743	0	0	0			44	25do p24h001_3-2.nd2	1.3559	1.1353	0.7413	0	0	0			44	25do p24h001_4-2.nd2	1.3022	0.7217	1.0839	0	0	0
45	25do p24h001_1-2.nd2	0.8465	0.8465	0.0001	0	0	0			45	25do p24h001_2-2.nd2	1.0725	1.0066	0.3702	0	0	0			45	25do p24h001_3-2.nd2	0	0	0	0	0	0			45	25do p24h001_4-2.nd2	0.5037	0.5037	0.0001	0	0	0
46	25do p24h001_1-2.nd2	0.523	0.523	0.0001	0	0	0			46	25do p24h001_2-2.nd2	1.3639	1.3639	0.0077	0	0	0			46	25do p24h001_3-2.nd2	1.6018	1.6018	0.0009	0	0	0			46	25do p24h001_4-2.nd2	0.8423	0.8423	0.0002	0	0	0
47	25do p24h001_1-2.nd2	0.8473	0.8473	0.0001	0	0	0			47	25do p24h001_2-2.nd2	1.5953	1.5949	0.0358	0	0	0			47	25do p24h001_3-2.nd2	1.4761	1.4761	0.0007	0	0	0			47	25do p24h001_4-2.nd2	0.4676	0.4675	0.0087	0	0	0
48	25do p24h001_1-2.nd2	1.0498	1.0459	0.0903	0	0	0			48	25do p24h001_2-2.nd2	1.9303	0.6819	1.8059	0	0	0			48	25do p24h001_3-2.nd2	0	0	0	0	0	0			48	25do p24h001_4-2.nd2	0.9849	0.9102	0.3763	0	0	0
49	25do p24h001_1-2.nd2	0.4086	0.4086	0.0005	0	0	0			49	25do p24h001_2-2.nd2	1.3155	1.3152	0.0286	0	0	0			49	25do p24h001_3-2.nd2	1.9618	1.9618	0.0002	0	0	0			49	25do p24h001_4-2.nd2	1.4692	1.4244	0.3597	0	0	0
50	25do p24h001_1-2.nd2	4.7091	1.1138	4.5755	0	0	0			50	25do p24h001_2-2.nd2	2.4655	2.4655	0.0026	0	0	0			50	25do p24h001_3-2.nd2	2.5385	2.5385	0.0001	0	0	0			50	25do p24h001_4-2.nd2	1.7025	1.7025	0.0003	0	0	0
51	25do p24h001_1-2.nd2	0	0	0	0	0	0			51	25do p24h001_2-2.nd2	0.7694	0.7694	0.0007	0	0	0			51	25do p24h001_3-2.nd2	4.3198	4.3198	0.0006	0	0	0			51	25do p24h001_4-2.nd2	3.7012	1.8801	3.1882	0	0	0
52	25do p24h001_1-2.nd2	1.0551	0.9875	0.3718	0	0	0			52	25do p24h001_2-2.nd2	2.6718	2.1873	1.5344	0	0	0			52	25do p24h001_3-2.nd2	2.5235	2.5235	0.002	0	0	0			52	25do p24h001_4-2.nd2	1.9694	0.9701	1.7138	0	0	0
53	25do p24h001_1-2.nd2	0.8968	0.8968	0.0014	0	0	0			53	25do p24h001_2-2.nd2	1.9894	1.9894	0.0028	0	0	0			53	25do p24h001_3-2.nd2	4.5477	4.5477	0.0063	0	0	0			53	25do p24h001_4-2.nd2	2.7043	2.7043	0.0083	0	0	0
54	25do p24h001_1-2.nd2	0.8268	0.8268	0.0013	0	0	0			54	25do p24h001_2-2.nd2	1.044	1.044	0.0014	0	0	0			54	25do p24h001_3-2.nd2	1.3515	1.3515	0.0021	0	0	0			54	25do p24h001_4-2.nd2	0.3208	0.0727	0.3125	0	0	0
55	25do p24h001_1-2.nd2	0.732	0.732	0.0012	0	0	0			55	25do p24h001_2-2.nd2	2.2245	2.1366	0.6191	0	0	0			55	25do p24h001_3-2.nd2	0	0	0	0	0	0			55	25do p24h001_4-2.nd2	0	0	0	0	0	0
56	25do p24h001_1-2.nd2	2.1869	2.092	0.6372	0	0	0			56	25do p24h001_2-2.nd2	0	0	0	0	0	0			56	25do p24h001_3-2.nd2	3.3497	3.3497	0.0046	0	0	0			56	25do p24h001_4-2.nd2	0.0334	0.0334	0.0003	0	0	0
57	25do p24h001_1-2.nd2	0.7689	0.7689	0.0019	0	0	0			57	25do p24h001_2-2.nd2	0.7909	0.7909	0.001	0	0	0			57	25do p24h001_3-2.nd2	5.1384	5.0258	1.0698	0	0	0			57	25do p24h001_4-2.nd2	0.1277	0.1277	0.0004	0	0	0
58	25do p24h001_1-2.nd2	3.4115	3.4115	0.0074	0	0	0			58	25do p24h001_2-2.nd2	1.7843	1.7843	0.0023	0	0	0			58	25do p24h001_3-2.nd2	2.1272	2.0237	0.6554	0	0	0			58	25do p24h001_4-2.nd2	0	0	0	0	0	0
59	25do p24h001_1-2.nd2	0.8879	0.6874	0.562	0	0	0			59	25do p24h001_2-2.nd2	2.3091	2.3091	0.0026	0	0	0			59	25do p24h001_3-2.nd2	0	0	0	0	0	0			59	25do p24h001_4-2.nd2	0.3439	0.064	0.3379	0	0	0
60	25do p24h001_1-2.nd2	1.456	1.456	0.0027	0	0	0			60	25do p24h001_2-2.nd2	2.9227	2.8451	0.6692	0	0	0			60	25do p24h001_3-2.nd2	0.6005	0.6005	0.0008	0	0	0			60	25do p24h001_4-2.nd2	0.6399	0.1677	0.6175	0	0	0
61	25do p24h001_1-3.nd2	0.879	0.879	0.0009	0	0	0			61	25do p24h001_2-3.nd2	0.7229	0.7229	0.0008	0	0	0			61	25do p24h001_3-3.nd2	2.1293	2.0961	0.3745	0	0	0			61	25do p24h001_4-3.nd2	2.6427	2.6427	0.0024	0	0	0
62	25do p24h001_1-3.nd2	0.4766	0.3101	0.3619	0	0	0			62	25do p24h001_2-3.nd2	0.3085	0.3085	0.0004	0	0	0			62	25do p24h001_3-3.nd2	0.8971	0.8971	0.0003	0	0	0			62	25do p24h001_4-3.nd2	0	0	0	0	0	0
63	25do p24h001_1-3.nd2	0.3473	0.3473	0.0003	0	0	0			63	25do p24h001_2-3.nd2	0.4855	0.4855	0.0007	0	0	0			63	25do p24h001_3-3.nd2	1.7898	1.7898	0.0001	0	0	0			63	25do p24h001_4-3.nd2	0.1279	0.1279	0	0	0	0
64	25do p24h001_1-3.nd2	0.7856	0.7856	0.003	0	0	0			64	25do p24h001_2-3.nd2	0.8387	0.8387	0.0003	0	0	0			64	25do p24h001_3-3.nd2	1.9171	0.4872	1.8542	0	0	0			64	25do p24h001_4-3.nd2	0.3974	0.1855	0.3515	0	0	0
65	25do p24h001_1-3.nd2	1.099	1.099	0.0009	0	0	0			65	25do p24h001_2-3.nd2	0.384	0.3838	0.0108	0	0	0			65	25do p24h001_3-3.nd2	0.2361	0.2361	2e-05	0	0	0			65	25do p24h001_4-3.nd2	0.4984	0.4984	0.0006	0	0	0
66	25do p24h001_1-3.nd2	1.6024	1.425	0.7328	0	0	0			66	25do p24h001_2-3.nd2	1.357	1.357	0.002	0	0	0			66	25do p24h001_3-3.nd2	3.3615	2.5145	2.231	0	0	0			66	25do p24h001_4-3.nd2	0.6069	0.6069	0.0007	0	0	0
67	25do p24h001_1-3.nd2	3.1929	3.1929	0.002	0	0	0			67	25do p24h001_2-3.nd2	1.022	1.022	0.0014	0	0	0			67	25do p24h001_3-3.nd2	0.5559	0.5559	0.0001	0	0	0			67	25do p24h001_4-3.nd2	0.9157	0.9157	0.0005	0	0	0
68	25do p24h001_1-3.nd2	1.7751	1.7751	0.0011	0	0	0			68	25do p24h001_2-3.nd2	0.5291	0.5291	0.0007	0	0	0			68	25do p24h001_3-3.nd2	1.2512	0.5721	1.1127	0	0	0			68	25do p24h001_4-3.nd2	0.617	0.617	0.0003	0	0	0
69	25do p24h001_1-3.nd2	3.5811	2.8168	2.2112	0	0	0			69	25do p24h001_2-3.nd2	1.0549	1.0549	0.0029	0	0	0			69	25do p24h001_3-3.nd2	2.31	2.31	0.0034	0	0	0			69	25do p24h001_4-3.nd2	0.7715	0.6857	0.3535	0	0	0
70	25do p24h001_1-3.nd2	1.415	1.415	0.0009	0	0	0			70	25do p24h001_2-3.nd2	0.2481	0.2481	0.0003	0	0	0			70	25do p24h001_3-3.nd2	1.2446	0.995	0.7477	0	0	0			70	25do p24h001_4-3.nd2	0.6636	0.6636	0.0002	0	0	0
71	25do p24h001_1-3.nd2	1.9446	1.9096	0.3677	0	0	0			71	25do p24h001_2-3.nd2	0.0661	0.0661	0.0001	0	0	0			71	25do p24h001_3-3.nd2	3.6938	3.5217	1.1143	0	0	0			71	25do p24h001_4-3.nd2	1.1968	1.1968	0.0005	0	0	0
72	25do p24h001_1-3.nd2	0.6614	0.6614	0.0004	0	0	0			72	25do p24h001_2-3.nd2	0.6497	0.6497	0.0104	0	0	0			72	25do p24h001_3-3.nd2	0	0	0	0	0	0			72	25do p24h001_4-3.nd2	2.1875	2.1875	0.0023	0	0	0
73	25do p24h001_1-3.nd2	2.3379	2.3378	0.0033	0	0	0			73	25do p24h001_2-3.nd2	0.8443	0.5946	0.5995	0	0	0			73	25do p24h001_3-3.nd2	0	0	0	0	0	0			73	25do p24h001_4-3.nd2	0.7436	0.7436	0.0009	0	0	0
74	25do p24h001_1-3.nd2	2.4087	2.2897	0.7477	0	0	0			74	25do p24h001_2-3.nd2	1.8443	1.826	0.2596	0	0	0			74	25do p24h001_3-3.nd2	0	0	0	0	0	0			74	25do p24h001_4-3.nd2	3.3595	3.3595	0.0018	0	0	0
75	25do p24h001_1-3.nd2	0	0	0	0	0	0			75	25do p24h001_2-3.nd2	0.0722	0.0722	0.0001	0	0	0			75	25do p24h001_3-3.nd2	0	0	0	0	0	0			75	25do p24h001_4-3.nd2	2.4821	2.2734	0.9963	0	0	0
76	25do p24h001_1-3.nd2	0	0	0	0	0	0			76	25do p24h001_2-3.nd2	2.0466	2.0466	0.0007	0	0	0			76	25do p24h001_3-3.nd2	1.2076	1.2076	0.0003	0	0	0			76	25do p24h001_4-3.nd2	0.6778	0.5718	0.3639	0	0	0
77	25do p24h001_1-3.nd2	0.806	0.806	0	0	0	0			77	25do p24h001_2-3.nd2	2.1932	2.1932	0.0014	0	0	0			77	25do p24h001_3-3.nd2	0.2545	0.2545	0.0008	0	0	0			77	25do p24h001_4-3.nd2	1.4614	0.1832	1.4499	0	0	0
78	25do p24h001_1-3.nd2	0	0	0	0	0	0			78	25do p24h001_2-3.nd2	1.5446	1.5048	0.3483	0	0	0			78	25do p24h001_3-3.nd2	0.4951	0.4951	0.0021	0	0	0			78	25do p24h001_4-3.nd2	0.8087	0.7319	0.3439	0	0	0
79	25do p24h001_1-3.nd2	1.9047	1.8689	0.3676	0	0	0			79	25do p24h001_2-3.nd2	3.9686	3.9539	0.3416	0	0	0			79	25do p24h001_3-3.nd2	0.5699	0.5699	0.0013	0	0	0			79	25do p24h001_4-3.nd2	0.0598	0.0598	0.0001	0	0	0
80	25do p24h001_1-3.nd2	0.8642	0.8642	0.0035	0	0	0			80	25do p24h001_2-3.nd2	1.5201	0.6067	1.3938	0	0	0			80	25do p24h001_3-3.nd2	1.4877	1.4877	0.0002	0	0	0			80	25do p24h001_4-3.nd2	1.1618	0.8964	0.7392	0	0	0
81	25do p24h001_1-3.nd2	0	0	0	0	0	0			81	25do p24h001_2-3.nd2	1.8074	1.8074	0.0014	0	0	0			81	25do p24h001_3-3.nd2	2.1525	2.1203	0.3709	0	0	0			81	25do p24h001_4-3.nd2	1.2063	0.5679	1.0643	0	0	0
82	25do p24h001_1-3.nd2	1.5553	0.5473	1.4559	0	0	0			82	25do p24h001_2-3.nd2	0.8609	0.5268	0.681	0	0	0			82	25do p24h001_3-3.nd2	2.7358	2.7103	0.3726	0	0	0			82	25do p24h001_4-3.nd2	0.0631	0.063	0.0016	0	0	0
83	25do p24h001_1-3.nd2	5.7538	5.7538	0.0047	0	0	0			83	25do p24h001_2-3.nd2	1.5225	1.4827	0.3461	0	0	0			83	25do p24h001_3-3.nd2	0.1263	0.1263	2e-05	0	0	0			83	25do p24h001_4-3.nd2	0	0	0	0	0	0
84	25do p24h001_1-3.nd2	0	0	0	0	0	0			84	25do p24h001_2-3.nd2	3.2084	3.2084	0.0006	0	0	0			84	25do p24h001_3-3.nd2	0.3379	0.1038	0.3216	0	0	0			84	25do p24h001_4-3.nd2	0	0	0	0	0	0
85	25do p24h001_1-3.nd2	4.4587	4.4587	0.0076	0	0	0			85	25do p24h001_2-3.nd2	2.1765	2.1765	0.0006	0	0	0			85	25do p24h001_3-3.nd2	1.1048	1.1048	0.0002	0	0	0			85	25do p24h001_4-3.nd2	0	0	0	0	0	0
86	25do p24h001_1-3.nd2	0.1245	0.1245	4e-05	0	0	0			86	25do p24h001_2-3.nd2	4.1581	4.1429	0.3556	0	0	0			86	25do p24h001_3-3.nd2	0.4558	0.4558	0.0009	0	0	0			86	25do p24h001_4-3.nd2	0.3861	0.1287	0.3641	0	0	0
87	25do p24h001_1-3.nd2	0.0578	0.0578	0.0003	0	0	0			87	25do p24h001_2-3.nd2	0.5098	0.5096	0.015	0	0	0			87	25do p24h001_3-3.nd2	1.0263	1.0263	0.0018	0	0	0			87	25do p24h001_4-3.nd2	0.3684	0.1038	0.3534	0	0	0
88	25do p24h001_1-3.nd2	0.0584	0.0584	0.0005	0	0	0			88	25do p24h001_2-3.nd2	2.0424	1.2684	1.6008	0	0	0			88	25do p24h001_3-3.nd2	0.7487	0.2528	0.7047	0	0	0			88	25do p24h001_4-3.nd2	0	0	0	0	0	0
89	25do p24h001_1-3.nd2	1.5731	0.6944	1.4116	0	0	0			89	25do p24h001_2-3.nd2	1.7664	1.7664	0.0017	0	0	0			89	25do p24h001_3-3.nd2	1.0341	1.0341	0.0003	0	0	0			89	25do p24h001_4-3.nd2	0	0	0	0	0	0
90	25do p24h001_1-3.nd2	0.4996	0.4996	3e-05	0	0	0			90	25do p24h001_2-3.nd2	1.0481	1.0481	0.0009	0	0	0			90	25do p24h001_3-3.nd2	0	0	0	0	0	0			90	25do p24h001_4-3.nd2	0	0	0	0	0	0
91	25do p24h001_1-4.nd2	1.5902	0.7831	1.3841	0	0	0			91	25do p24h001_2-4.nd2	1.7799	1.7799	0.0005	0	0	0			91	25do p24h001_3-4.nd2	2.6701	2.5723	0.7158	0	0	0			91	25do p24h001_4-4.nd2	0.8245	0.8245	0.0005	0	0	0
92	25do p24h001_1-4.nd2	0.6962	0.6024	0.349	0	0	0			92	25do p24h001_2-4.nd2	2.0858	2.0553	0.3553	0	0	0			92	25do p24h001_3-4.nd2	1.6456	1.6124	0.3291	0	0	0			92	25do p24h001_4-4.nd2	0.6117	0.6117	0.0004	0	0	0
93	25do p24h001_1-4.nd2	0.8879	0.8163	0.3495	0	0	0			93	25do p24h001_2-4.nd2	0.2579	0.2579	0.0001	0	0	0			93	25do p24h001_3-4.nd2	0	0	0	0	0	0			93	25do p24h001_4-4.nd2	1.2697	1.2696	0.0059	0	0	0
94	25do p24h001_1-4.nd2	0.8281	0.8281	0.0017	0	0	0			94	25do p24h001_2-4.nd2	1.2018	1.2018	0.0005	0	0	0			94	25do p24h001_3-4.nd2	0	0	0	0	0	0			94	25do p24h001_4-4.nd2	2.255	2.2549	0.0239	0	0	0
95	25do p24h001_1-4.nd2	2.7473	2.7473	0.0067	0	0	0			95	25do p24h001_2-4.nd2	0.8682	0.8682	0.0001	0	0	0			95	25do p24h001_3-4.nd2	0.9653	0.9653	0.0005	0	0	0			95	25do p24h001_4-4.nd2	0.9209	0.9209	0.0001	0	0	0
96	25do p24h001_1-4.nd2	0.1549	0.1549	0.0001	0	0	0			96	25do p24h001_2-4.nd2	0.2588	0.2588	0.0001	0	0	0			96	25do p24h001_3-4.nd2	0.1587	0.1587	0.0012	0	0	0			96	25do p24h001_4-4.nd2	0	0	0	0	0	0
97	25do p24h001_1-4.nd2	0.4716	0.3077	0.3575	0	0	0			97	25do p24h001_2-4.nd2	0.6811	0.6811	0.0001	0	0	0			97	25do p24h001_3-4.nd2	0.377	0.377	0.0028	0	0	0			97	25do p24h001_4-4.nd2	1.7303	0.0963	1.7276	0	0	0
98	25do p24h001_1-4.nd2	1.1671	1.1133	0.3502	0	0	0			98	25do p24h001_2-4.nd2	0.1334	0.1334	0.0002	0	0	0			98	25do p24h001_3-4.nd2	0.5475	0.4157	0.3564	0	0	0			98	25do p24h001_4-4.nd2	0.059	0.059	4e-05	0	0	0
99	25do p24h001_1-4.nd2	0.7442	0.2448	0.7028	0	0	0			99	25do p24h001_2-4.nd2	0	0	0	0	0	0			99	25do p24h001_3-4.nd2	0.4772	0.3193	0.3547	0	0	0			99	25do p24h001_4-4.nd2	0	0	0	0	0	0
100	25do p24h001_1-4.nd2	0.2227	0.2227	0.0008	0	0	0			100	25do p24h001_2-4.nd2	0.4722	0.3254	0.3421	0	0	0			100	25do p24h001_3-4.nd2	0.3184	0.3184	0	0	0	0			100	25do p24h001_4-4.nd2	0	0	0	0	0	0
101	25do p24h001_1-4.nd2	0.7761	0.7761	0.0006	0	0	0			101	25do p24h001_2-4.nd2	0.3595	0.1322	0.3343	0	0	0			101	25do p24h001_3-4.nd2	1.6784	1.3091	1.0505	0	0	0			101	25do p24h001_4-4.nd2	3.0324	2.8458	1.0473	0	0	0
102	25do p24h001_1-4.nd2	0.4667	0.3175	0.342	0	0	0			102	25do p24h001_2-4.nd2	3.0071	3.0071	0.0041	0	0	0			102	25do p24h001_3-4.nd2	0.2047	0.2047	0.0005	0	0	0			102	25do p24h001_4-4.nd2	2.2377	2.2377	0.0011	0	0	0
103	25do p24h001_1-4.nd2	0.5802	0.5802	0.0001	0	0	0			103	25do p24h001_2-4.nd2	0.3675	0.3675	2e-05	0	0	0			103	25do p24h001_3-4.nd2	0.6477	0.6477	0.0003	0	0	0			103	25do p24h001_4-4.nd2	1.7651	1.73	0.3503	0	0	0
104	25do p24h001_1-4.nd2	1.1751	1.1751	1e-05	0	0	0			104	25do p24h001_2-4.nd2	3.3483	3.0893	1.291	0	0	0			104	25do p24h001_3-4.nd2	0.9675	0.9674	0.0104	0	0	0			104	25do p24h001_4-4.nd2	0.9494	0.9494	0.0005	0	0	0
105	25do p24h001_1-4.nd2	0.7046	0.7046	0.0002	0	0	0			105	25do p24h001_2-4.nd2	2.1726	0.7813	2.0273	0	0	0			105	25do p24h001_3-4.nd2	0.7648	0.2807	0.7114	0	0	0			105	25do p24h001_4-4.nd2	0.2888	0.2888	0.0002	0	0	0
106	25do p24h001_1-4.nd2	3.4153	3.3487	0.6713	0	0	0			106	25do p24h001_2-4.nd2	1.0279	1.0279	0.0014	0	0	0			106	25do p24h001_3-4.nd2	0.1654	0.1653	0.0028	0	0	0			106	25do p24h001_4-4.nd2	2.0083	1.974	0.3693	0	0	0
107	25do p24h001_1-4.nd2	4.3829	4.3829	0.0041	0	0	0			107	25do p24h001_2-4.nd2	2.5945	2.5863	0.207	0	0	0			107	25do p24h001_3-4.nd2	4.0825	4.0825	0.0038	0	0	0			107	25do p24h001_4-4.nd2	2.8433	2.6498	1.0308	0	0	0
108	25do p24h001_1-4.nd2	2.7157	1.7662	2.0629	0	0	0			108	25do p24h001_2-4.nd2	0.3234	0.3234	0.0005	0	0	0			108	25do p24h001_3-4.nd2	4.9841	4.9723	0.3429	0	0	0			108	25do p24h001_4-4.nd2	0	0	0	0	0	0
109	25do p24h001_1-4.nd2	0.1317	0.1317	0.0001	0	0	0			109	25do p24h001_2-4.nd2	0.9031	0.8076	0.4043	0	0	0			109	25do p24h001_3-4.nd2	0.9041	0.9041	0.0005	0	0	0			109	25do p24h001_4-4.nd2	0.1269	0.1269	4e-05	0	0	0
110	25do p24h001_1-4.nd2	0.6717	0.5718	0.3525	0	0	0			110	25do p24h001_2-4.nd2	0	0	0	0	0	0			110	25do p24h001_3-4.nd2	1.9503	1.9503	0.0037	0	0	0			110	25do p24h001_4-4.nd2	1.2705	1.0569	0.7051	0	0	0
111	25do p24h001_1-4.nd2	0	0	0	0	0	0			111	25do p24h001_2-4.nd2	0	0	0	0	0	0			111	25do p24h001_3-4.nd2	0.6904	0.6904	0.0009	0	0	0			111	25do p24h001_4-4.nd2	1.8712	1.5343	1.0711	0	0	0
112	25do p24h001_1-4.nd2	0.4061	0.3011	0.2725	0	0	0			112	25do p24h001_2-4.nd2	3.0574	2.4414	1.8404	0	0	0			112	25do p24h001_3-4.nd2	2.1837	2.1837	0.003	0	0	0			112	25do p24h001_4-4.nd2	2.8549	2.2394	1.7708	0	0	0
113	25do p24h001_1-4.nd2	0.4285	0.4285	0.0005	0	0	0			113	25do p24h001_2-4.nd2	0.2766	0.2766	0.0009	0	0	0			113	25do p24h001_3-4.nd2	1.7533	1.7533	0.003	0	0	0			113	25do p24h001_4-4.nd2	0	0	0	0	0	0
114	25do p24h001_1-4.nd2	1.0381	1.0381	0.0004	0	0	0			114	25do p24h001_2-4.nd2	0	0	0	0	0	0			114	25do p24h001_3-4.nd2	1.245	1.245	0.0017	0	0	0			114	25do p24h001_4-4.nd2	0.1723	0.1723	0.0003	0	0	0
115	25do p24h001_1-4.nd2	1.0949	0.7543	0.7935	0	0	0			115	25do p24h001_2-4.nd2	0	0	0	0	0	0			115	25do p24h001_3-4.nd2	3.2896	2.7637	1.7843	0	0	0			115	25do p24h001_4-4.nd2	3.7383	3.7383	0.0068	0	0	0
116	25do p24h001_1-4.nd2	0.1426	0.1426	0.0001	0	0	0			116	25do p24h001_2-4.nd2	3.4552	3.4546	0.059	0	0	0			116	25do p24h001_3-4.nd2	3.5303	2.7967	2.1544	0	0	0			116	25do p24h001_4-4.nd2	0.3465	0.3465	0.0007	0	0	0
117	25do p24h001_1-4.nd2	0.3923	0.3923	0.0005	0	0	0			117	25do p24h001_2-4.nd2	0	0	0	0	0	0			117	25do p24h001_3-4.nd2	4.1837	3.6725	2.0039	0	0	0			117	25do p24h001_4-4.nd2	1.8344	1.8344	0.0041	0	0	0
118	25do p24h001_1-4.nd2	0.6316	0.3542	0.5229	0	0	0			118	25do p24h001_2-4.nd2	0	0	0	0	0	0			118	25do p24h001_3-4.nd2	2.2663	2.2663	0.004	0	0	0			118	25do p24h001_4-4.nd2	0	0	0	0	0	0
119	25do p24h001_1-4.nd2	2.7532	2.6647	0.6923	0	0	0			119	25do p24h001_2-4.nd2	0	0	0	0	0	0			119	25do p24h001_3-4.nd2	0.0441	0.0441	0.0001	0	0	0			119	25do p24h001_4-4.nd2	0.4578	0.4578	0.001	0	0	0
120	25do p24h001_1-4.nd2	0.5453	0.5452	0.0062	0	0	0			120	25do p24h001_2-4.nd2	0	0	0	0	0	0			120	25do p24h001_3-4.nd2	0.7931	0.793	0.0017	0	0	0			120	25do p24h001_4-4.nd2	1.5768	1.5768	0.0027	0	0	0
Feature	Mean	St.Dev	Minimum	Maximum						Feature	Mean	St.Dev	Minimum	Maximum						Feature	Mean	St.Dev	Minimum	Maximum						Feature	Mean	St.Dev	Minimum	Maximum
Length xyz	1.0389	1.1147	0	5.7538						Length xyz	1.3311	1.1437	0	6.1133						Length xyz	1.4104	1.5439	0	10.0643						Length xyz	1.0325	1.0411	0	4.3831
Length xy	0.8759	1.0091	0	5.7538						Length xy	1.1856	1.0783	0	6.0598						Length xy	1.2195	1.3044	0	5.4383						Length xy	0.8871	0.9677	0	4.3673
Height	0.31	0.6636	0	4.5755						Height	0.3363	0.6312	0	4.5868						Height	0.3837	1.0184	0	9.0593						Height	0.3145	0.5724	0	3.1882

## Sheet: WT
Item	Source	Length xyz	Length xy	Height	ND.T	ND.Z	ND.M	Comment
1	25do p24h.nd2	0.6131	0.6122	0.0338	0	0	0
2	25do p24h.nd2	0	0	0	0	0	0
3	25do p24h.nd2	0	0	0	0	0	0
4	25do p24h.nd2	0.1617	0.1617	0	0	0	0			5	127	136	155	144	562
5	25do p24h.nd2	0	0	0	0	0	0			15	0	0	1	2	3
6	25do p24h.nd2	0.3235	0.0153	0.3232	0	0	0				0	0	0	0	0
7	25do p24h.nd2	0	0	0	0	0	0
8	25do p24h.nd2	0.7739	0.7737	0.0195	0	0	0
9	25do p24h.nd2	0.481	0.3578	0.3215	0	0	0
10	25do p24h.nd2	1.6813	1.1209	1.2531	0	0	0
11	25do p24h.nd2	0.6349	0.0789	0.63	0	0	0
12	25do p24h.nd2	0	0	0	0	0	0
13	25do p24h.nd2	0.6529	0.5727	0.3136	0	0	0
14	25do p24h.nd2	0.5104	0.407	0.308	0	0	0
15	25do p24h.nd2	0.7493	0.7493	0	0	0	0
16	25do p24h.nd2	0.3192	0.0942	0.305	0	0	0
17	25do p24h.nd2	0.3467	0.1705	0.302	0	0	0
18	25do p24h.nd2	0.2269	0.2269	0.001	0	0	0
19	25do p24h.nd2	2.565	2.5513	0.2644	0	0	0
20	25do p24h.nd2	0.0767	0.0767	0.0005	0	0	0
21	25do p24h.nd2	0	0	0	0	0	0
22	25do p24h.nd2	0.0762	0.0762	0.0003	0	0	0
23	25do p24h.nd2	0	0	0	0	0	0
24	25do p24h.nd2	0	0	0	0	0	0
25	25do p24h.nd2	0.3179	0.0699	0.3102	0	0	0
26	25do p24h.nd2	0	0	0	0	0	0
27	25do p24h.nd2	0.3201	0.0967	0.3052	0	0	0
28	25do p24h.nd2	0.4388	0.3091	0.3114	0	0	0
29	25do p24h.nd2	0.0828	0.0828	0.0001	0	0	0
30	25do p24h.nd2	0	0	0	0	0	0
31	25do p24h.nd2	3.3853	2.0594	2.6868	0	0	0
32	25do p24h.nd2	1.9321	1.9047	0.3244	0	0	0
33	25do p24h.nd2	2.1612	0.8669	1.9797	0	0	0
34	25do p24h.nd2	0.9865	0.9314	0.3253	0	0	0
35	25do p24h.nd2	0.7009	0.2319	0.6614	0	0	0
36	25do p24h.nd2	3.3532	0.4259	3.3261	0	0	0
37	25do p24h.nd2	1.7405	0.5099	1.6642	0	0	0
38	25do p24h.nd2	1.6995	0.2832	1.6758	0	0	0
39	25do p24h.nd2	1.3444	0.0845	1.3417	0	0	0
40	25do p24h.nd2	2.1256	0.6795	2.014	0	0	0
41	25do p24h.nd2	2.7976	0.7802	2.6866	0	0	0
42	25do p24h.nd2	0.6061	0.5042	0.3363	0	0	0
43	25do p24h.nd2	1.0723	0.8352	0.6725	0	0	0
44	25do p24h.nd2	0.0841	0.0841	0	0	0	0
45	25do p24h.nd2	0.0849	0.0849	0.0001	0	0	0
46	25do p24h.nd2	0	0	0	0	0	0
47	25do p24h.nd2	2.1098	0.6069	2.0206	0	0	0
48	25do p24h.nd2	0.1677	0.1677	0.0001	0	0	0
49	25do p24h.nd2	0.2626	0.2626	0	0	0	0
50	25do p24h.nd2	0.6834	0.6834	0.0007	0	0	0
51	25do p24h.nd2	0.0822	0.0822	0	0	0	0
52	25do p24h.nd2	1.068	0.3692	1.0022	0	0	0
53	25do p24h.nd2	0.665	0.5754	0.3335	0	0	0
54	25do p24h.nd2	0	0	0	0	0	0
55	25do p24h.nd2	0.162	0.162	0	0	0	0
56	25do p24h.nd2	0.3705	0.1701	0.3291	0	0	0
57	25do p24h.nd2	0	0	0	0	0	0
58	25do p24h.nd2	0.3585	0.1472	0.3269	0	0	0
59	25do p24h.nd2	0.3253	0.3253	0.0012	0	0	0
60	25do p24h.nd2	0.1894	0.1894	0.0015	0	0	0
61	25do p24h.nd2	0.0814	0.0814	0	0	0	0
62	25do p24h.nd2	0.1624	0.1624	0	0	0	0
63	25do p24h.nd2	0.4729	0.4729	0	0	0	0
64	25do p24h.nd2	0.8229	0.8229	0	0	0	0
65	25do p24h.nd2	0.5087	0.5087	0	0	0	0
66	25do p24h.nd2	1.0441	1.0441	0	0	0	0
67	25do p24h.nd2	0.3711	0.144	0.342	0	0	0
68	25do p24h.nd2	0.4743	0.341	0.3296	0	0	0
69	25do p24h.nd2	0.5414	0.5414	0	0	0	0
70	25do p24h.nd2	0.4402	0.288	0.3329	0	0	0
71	25do p24h.nd2	0.4865	0.4865	0	0	0	0
72	25do p24h.nd2	0.9637	0.9637	0	0	0	0
73	25do p24h.nd2	0.3733	0.3733	0.0022	0	0	0
74	25do p24h.nd2	0	0	0	0	0	0
75	25do p24h.nd2	0	0	0	0	0	0
76	25do p24h.nd2	0	0	0	0	0	0
77	25do p24h.nd2	1.3207	0.8355	1.0228	0	0	0
78	25do p24h.nd2	0.3801	0.1696	0.3402	0	0	0
79	25do p24h.nd2	0.0823	0.0823	0	0	0	0
80	25do p24h.nd2	0.3433	0.1321	0.3168	0	0	0
81	25do p24h.nd2	0.4917	0.1161	0.4778	0	0	0
82	25do p24h.nd2	1.1843	0.3716	1.1245	0	0	0
83	25do p24h.nd2	0.9043	0.4072	0.8075	0	0	0
84	25do p24h.nd2	0.771	0.6953	0.3332	0	0	0
85	25do p24h.nd2	2.8396	1.0142	2.6523	0	0	0
86	25do p24h.nd2	2.9849	2.6752	1.3242	0	0	0
87	25do p24h.nd2	1.2804	1.2804	0	0	0	0
88	25do p24h.nd2	3.4991	3.0983	1.6261	0	0	0
89	25do p24h.nd2	1.9387	1.6837	0.9611	0	0	0
90	25do p24h.nd2	1.7595	1.643	0.6294	0	0	0
91	25do p24h.nd2	0.444	0.444	0	0	0	0
92	25do p24h.nd2	2.4451	1.8936	1.5469	0	0	0
93	25do p24h.nd2	0.4632	0.3241	0.3309	0	0	0
94	25do p24h.nd2	0	0	0	0	0	0
95	25do p24h.nd2	0.5012	0.5012	0	0	0	0
96	25do p24h.nd2	0.7531	0.6964	0.2865	0	0	0
97	25do p24h.nd2	1.0153	1.0153	0	0	0	0
98	25do p24h.nd2	0.7973	0.7973	0	0	0	0
99	25do p24h.nd2	0.7578	0.7578	0	0	0	0
100	25do p24h.nd2	0.5395	0.5395	0	0	0	0
101	25do p24h.nd2	0.816	0.816	0.001	0	0	0
102	25do p24h.nd2	0.9233	0.9233	0	0	0	0
103	25do p24h.nd2	1.0051	0.9607	0.2954	0	0	0
104	25do p24h.nd2	0.8217	0.8217	0	0	0	0
105	25do p24h.nd2	0.2171	0.2171	0	0	0	0
106	25do p24h.nd2	0.6883	0.6257	0.2866	0	0	0
107	25do p24h.nd2	1.0161	1.0161	0	0	0	0
108	25do p24h.nd2	1.0529	1.0529	0	0	0	0
109	25do p24h.nd2	0.4947	0.4947	0	0	0	0
110	25do p24h.nd2	0.4099	0.4099	0	0	0	0
111	25do p24h.nd2	2.5181	0.3562	2.4928	0	0	0
112	25do p24h.nd2	1.7176	1.6289	0.5448	0	0	0
113	25do p24h.nd2	0.4686	0.3822	0.2711	0	0	0
114	25do p24h.nd2	0.8618	0.6639	0.5495	0	0	0
115	25do p24h.nd2	1.2664	1.2664	0	0	0	0
116	25do p24h.nd2	0.1396	0.1396	0	0	0	0
117	25do p24h.nd2	0.3479	0.3479	0	0	0	0
118	25do p24h.nd2	0.4522	0.4522	0	0	0	0
119	25do p24h.nd2	0.2154	0.2154	0	0	0	0
120	25do p24h.nd2	0.1924	0.1924	0.0001	0	0	0
121	25do p24h.nd2	1.6165	1.275	0.9936	0	0	0
122	25do p24h.nd2	0	0	0	0	0	0
123	25do p24h.nd2	0	0	0	0	0	0
124	25do p24h.nd2	0.9519	0.1836	0.934	0	0	0
125	25do p24h.nd2	0	0	0	0	0	0
126	25do p24h.nd2	0.4372	0.0605	0.433	0	0	0
127	25do p24h.nd2	0	0	0	0	0	0
Feature	Mean	St.Dev	Minimum	Maximum
Length xyz	0.8105	1.1026	0	9.2409
Length xy	0.508	0.5755	0	3.0983
Height	0.4684	1.0315	0	9.1817
Item	Source	Length xyz	Length xy	Height	ND.T	ND.Z	ND.M	Comment
1	25do p24h.nd2	0.3226	0.141	0.2901	0	0	0
2	25do p24h.nd2	0.4355	0.3171	0.2985	0	0	0
3	25do p24h.nd2	1.1514	0.9905	0.587	0	0	0
4	25do p24h.nd2	0.9968	0.4453	0.8919	0	0	0
5	25do p24h.nd2	0.5474	0.4551	0.3042	0	0	0
6	25do p24h.nd2	0.4019	0.2711	0.2967	0	0	0
7	25do p24h.nd2	0.2619	0.2619	0	0	0	0
8	25do p24h.nd2	0.1617	0.1617	0	0	0	0
9	25do p24h.nd2	0.1021	0.1021	0	0	0	0
10	25do p24h.nd2	0.4166	0.4166	0.0004	0	0	0
11	25do p24h.nd2	0.6002	0.1206	0.588	0	0	0
12	25do p24h.nd2	0.3813	0.3813	0	0	0	0
13	25do p24h.nd2	0	0	0	0	0	0
14	25do p24h.nd2	0.5674	0.5674	0.0006	0	0	0
15	25do p24h.nd2	0.4158	0.4158	0	0	0	0
16	25do p24h.nd2	0.624	0.2235	0.5825	0	0	0
17	25do p24h.nd2	0.0982	0.0982	0.0001	0	0	0
18	25do p24h.nd2	0	0	0	0	0	0
19	25do p24h.nd2	0	0	0	0	0	0
20	25do p24h.nd2	0.3982	0.2726	0.2903	0	0	0
21	25do p24h.nd2	0.9126	0.9126	0	0	0	0
22	25do p24h.nd2	0.3169	0.3169	0	0	0	0
23	25do p24h.nd2	0.2715	0.2715	0	0	0	0
24	25do p24h.nd2	0	0	0	0	0	0
25	25do p24h.nd2	0.5988	0.5988	0.0042	0	0	0
26	25do p24h.nd2	0.0766	0.0766	0.0005	0	0	0
27	25do p24h.nd2	0.3347	0.0578	0.3296	0	0	0
28	25do p24h.nd2	0.7929	0.4445	0.6565	0	0	0
29	25do p24h.nd2	0.478	0.478	0	0	0	0
30	25do p24h.nd2	1.1933	0.6789	0.9814	0	0	0
31	25do p24h.nd2	0	0	0	0	0	0
32	25do p24h.nd2	0	0	0	0	0	0
33	25do p24h.nd2	0.3265	0.0278	0.3253	0	0	0
34	25do p24h.nd2	0.0746	0.0746	0	0	0	0
35	25do p24h.nd2	0.2779	0.2779	0	0	0	0
36	25do p24h.nd2	0	0	0	0	0	0
37	25do p24h.nd2	0.3764	0.2091	0.3129	0	0	0
38	25do p24h.nd2	0	0	0	0	0	0
39	25do p24h.nd2	0.3069	0.3069	0	0	0	0
40	25do p24h.nd2	0.3088	0.3088	0.0003	0	0	0
41	25do p24h.nd2	0.8365	0.492	0.6766	0	0	0
42	25do p24h.nd2	0.616	0.5135	0.3402	0	0	0
43	25do p24h.nd2	0.68	0.68	0	0	0	0
44	25do p24h.nd2	0.6959	0.6959	0	0	0	0
45	25do p24h.nd2	0.392	0.1984	0.3381	0	0	0
46	25do p24h.nd2	0.3669	0.3669	0	0	0	0
47	25do p24h.nd2	0.4961	0.3606	0.3406	0	0	0
48	25do p24h.nd2	0.6988	0.6988	0	0	0	0
49	25do p24h.nd2	0.4935	0.4935	0	0	0	0
50	25do p24h.nd2	0	0	0	0	0	0
51	25do p24h.nd2	0.2746	0.2746	0	0	0	0
52	25do p24h.nd2	0.275	0.275	0	0	0	0
53	25do p24h.nd2	1.4377	0.4331	1.3709	0	0	0
54	25do p24h.nd2	1.7391	0.3003	1.7129	0	0	0
55	25do p24h.nd2	1.0983	0.3895	1.0269	0	0	0
56	25do p24h.nd2	0.7337	0.7337	0	0	0	0
57	25do p24h.nd2	0.5228	0.3955	0.3419	0	0	0
58	25do p24h.nd2	1.2402	0.6994	1.0243	0	0	0
59	25do p24h.nd2	1.7731	0.492	1.7035	0	0	0
60	25do p24h.nd2	1.8233	0.6576	1.7006	0	0	0
61	25do p24h.nd2	0	0	0	0	0	0
62	25do p24h.nd2	0	0	0	0	0	0
63	25do p24h.nd2	0.4661	0.3181	0.3407	0	0	0
64	25do p24h.nd2	1.1663	1.1156	0.34	0	0	0
65	25do p24h.nd2	1.472	0.5692	1.3575	0	0	0
66	25do p24h.nd2	0.4176	0.4176	0.0004	0	0	0
67	25do p24h.nd2	0	0	0	0	0	0
68	25do p24h.nd2	0.5099	0.3828	0.3369	0	0	0
69	25do p24h.nd2	0.4768	0.4768	0.0001	0	0	0
70	25do p24h.nd2	0.3646	0.1433	0.3353	0	0	0
71	25do p24h.nd2	0.6716	0.6716	0.0019	0	0	0
72	25do p24h.nd2	0.529	0.4165	0.3261	0	0	0
73	25do p24h.nd2	0.7763	0.7763	0	0	0	0
74	25do p24h.nd2	1.7905	0.7291	1.6354	0	0	0
75	25do p24h.nd2	0	0	0	0	0	0
76	25do p24h.nd2	0.6153	0.5265	0.3184	0	0	0
77	25do p24h.nd2	1.3259	1.3259	0.0018	0	0	0
78	25do p24h.nd2	0.9371	0.8812	0.3189	0	0	0
79	25do p24h.nd2	1.2546	1.2546	0	0	0	0
80	25do p24h.nd2	0.3773	0.1958	0.3226	0	0	0
81	25do p24h.nd2	2.3864	2.3864	0	0	0	0
82	25do p24h.nd2	0	0	0	0	0	0
83	25do p24h.nd2	1.6337	0.9131	1.3547	0	0	0
84	25do p24h.nd2	0.6335	0.6335	0	0	0	0
85	25do p24h.nd2	1.0517	1.0517	0	0	0	0
86	25do p24h.nd2	0.0899	0.0899	0.0001	0	0	0
87	25do p24h.nd2	0.9728	0.9728	0	0	0	0
88	25do p24h.nd2	0.7623	0.6808	0.3428	0	0	0
89	25do p24h.nd2	0.7419	0.2862	0.6844	0	0	0
90	25do p24h.nd2	0.7187	0.2255	0.6824	0	0	0
91	25do p24h.nd2	0.3786	0.1737	0.3364	0	0	0
92	25do p24h.nd2	0.2119	0.2119	0	0	0	0
93	25do p24h.nd2	0.419	0.2463	0.339	0	0	0
94	25do p24h.nd2	0.7299	0.2643	0.6804	0	0	0
95	25do p24h.nd2	0.7567	0.3267	0.6825	0	0	0
96	25do p24h.nd2	0.5566	0.4391	0.3419	0	0	0
97	25do p24h.nd2	1.7794	0.5071	1.7056	0	0	0
98	25do p24h.nd2	0.5913	0.5913	0	0	0	0
99	25do p24h.nd2	0.1485	0.1485	0.0014	0	0	0
100	25do p24h.nd2	1.407	1.407	0	0	0	0
101	25do p24h.nd2	0.0713	0.0713	0	0	0	0
102	25do p24h.nd2	0.4693	0.3505	0.3122	0	0	0
103	25do p24h.nd2	0.9486	0.1089	0.9423	0	0	0
104	25do p24h.nd2	0	0	0	0	0	0
105	25do p24h.nd2	0.4005	0.26	0.3047	0	0	0
106	25do p24h.nd2	4.1459	1.885	3.6926	0	0	0
107	25do p24h.nd2	2.1877	2.1877	0	0	0	0
108	25do p24h.nd2	0	0	0	0	0	0
109	25do p24h.nd2	0.4935	0.4935	0	0	0	0
110	25do p24h.nd2	1.2031	0.8053	0.8939	0	0	0
111	25do p24h.nd2	3.3353	3.3353	0	0	0	0
112	25do p24h.nd2	0.1683	0.1683	0.0016	0	0	0
113	25do p24h.nd2	0.6171	0.0632	0.6138	0	0	0
114	25do p24h.nd2	0	0	0	0	0	0
115	25do p24h.nd2	0.3731	0.3731	0	0	0	0
116	25do p24h.nd2	1.0109	0.8029	0.6142	0	0	0
117	25do p24h.nd2	3.3354	3.3354	0	0	0	0
118	25do p24h.nd2	3.6937	3.6937	0	0	0	0
119	25do p24h.nd2	0	0	0	0	0	0
120	25do p24h.nd2	0.2579	0.2579	0	0	0	0
121	25do p24h.nd2	0.6563	0.1837	0.63	0	0	0
122	25do p24h.nd2	0.5837	0.5837	0	0	0	0
123	25do p24h.nd2	1.0007	0.7773	0.6304	0	0	0
124	25do p24h.nd2	0.3164	0.0449	0.3131	0	0	0
125	25do p24h.nd2	0	0	0	0	0	0
126	25do p24h.nd2	0.2658	0.2658	0.0016	0	0	0
127	25do p24h.nd2	0.1176	0.1176	0.0004	0	0	0
128	25do p24h.nd2	1.0521	0.5098	0.9203	0	0	0
129	25do p24h.nd2	0.1144	0.1144	0	0	0	0
130	25do p24h.nd2	4.553	1.6111	4.2584	0	0	0
131	25do p24h.nd2	0.3078	0.0619	0.3015	0	0	0
132	25do p24h.nd2	0.5411	0.4513	0.2985	0	0	0
133	25do p24h.nd2	1.1068	0.6608	0.888	0	0	0
134	25do p24h.nd2	4.1243	1.5563	3.8193	0	0	0
135	25do p24h.nd2	0	0	0	0	0	0
136	25do p24h.nd2	0.7381	0.4709	0.5684	0	0	0
Feature	Mean	St.Dev	Minimum	Maximum
Length xyz	0.9757	1.6442	0	9.7737
Length xy	0.4941	0.6155	0	3.6937
Height	0.7233	1.5841	0	9.0489
Item	Source	Length xyz	Length xy	Height	ND.T	ND.Z	ND.M	Comment
1	25do p24h.nd2	0.8601	0.8601	0.0005	0	0	0
2	25do p24h.nd2	1.6791	1.6791	0.0009	0	0	0
3	25do p24h.nd2	8.8981	8.3001	3.2069	0	0	0
4	25do p24h.nd2	2.4241	2.4241	0.0012	0	0	0
5	25do p24h.nd2	0.4815	0.4815	0.0003	0	0	0
6	25do p24h.nd2	0.3018	0.0795	0.2912	0	0	0
7	25do p24h.nd2	0	0	0	0	0	0
8	25do p24h.nd2	0.9044	0.9044	0.0009	0	0	0
9	25do p24h.nd2	2.1795	0.3317	2.1541	0	0	0
10	25do p24h.nd2	0	0	0	0	0	0
11	25do p24h.nd2	0	0	0	0	0	0
12	25do p24h.nd2	0.8593	0.8026	0.3071	0	0	0
13	25do p24h.nd2	0.9637	0.9637	0.001	0	0	0
14	25do p24h.nd2	1.1314	1.1314	0.0012	0	0	0
15	25do p24h.nd2	2.0501	2.0501	0.0021	0	0	0
16	25do p24h.nd2	3.1309	1.5034	2.7463	0	0	0
17	25do p24h.nd2	1.2239	1.2239	0.0015	0	0	0
18	25do p24h.nd2	0.6247	0.0887	0.6184	0	0	0
19	25do p24h.nd2	0	0	0	0	0	0
20	25do p24h.nd2	0.222	0.222	0.0003	0	0	0
21	25do p24h.nd2	0	0	0	0	0	0
22	25do p24h.nd2	0.0705	0.0705	0.0005	0	0	0
23	25do p24h.nd2	0.157	0.157	0.0002	0	0	0
24	25do p24h.nd2	0.1534	0.1534	0.0001	0	0	0
25	25do p24h.nd2	0.5606	0.5606	0.0007	0	0	0
26	25do p24h.nd2	0	0	0	0	0	0
27	25do p24h.nd2	0.1339	0.1339	2e-05	0	0	0
28	25do p24h.nd2	0	0	0	0	0	0
29	25do p24h.nd2	0.2109	0.2109	0.0003	0	0	0
30	25do p24h.nd2	0.2109	0.2109	0.0003	0	0	0
31	25do p24h.nd2	0	0	0	0	0	0
32	25do p24h.nd2	4.7996	1.7443	4.4714	0	0	0
33	25do p24h.nd2	0.2216	0.2216	0.0003	0	0	0
34	25do p24h.nd2	0.2406	0.2406	0.0001	0	0	0
35	25do p24h.nd2	0.0626	0.0626	0.0001	0	0	0
36	25do p24h.nd2	0.2206	0.2206	0.0003	0	0	0
37	25do p24h.nd2	1.4841	1.4841	0.002	0	0	0
38	25do p24h.nd2	0.7404	0.7404	0.001	0	0	0
39	25do p24h.nd2	0.0856	0.0856	0.0001	0	0	0
40	25do p24h.nd2	0	0	0	0	0	0
41	25do p24h.nd2	0.2453	0.2453	0.0003	0	0	0
42	25do p24h.nd2	1.1299	1.1299	0.0014	0	0	0
43	25do p24h.nd2	0.8312	0.8312	0.0009	0	0	0
44	25do p24h.nd2	0.5442	0.5442	0.0006	0	0	0
45	25do p24h.nd2	0.3201	0.3201	0.0004	0	0	0
46	25do p24h.nd2	0.1656	0.1656	0.0002	0	0	0
47	25do p24h.nd2	0.209	0.209	0.0002	0	0	0
48	25do p24h.nd2	0.4471	0.4471	0.0005	0	0	0
49	25do p24h.nd2	2.2809	0.2675	2.2652	0	0	0
50	25do p24h.nd2	0.2387	0.2387	0.0023	0	0	0
51	25do p24h.nd2	1.6834	0.2809	1.6598	0	0	0
52	25do p24h.nd2	0.704	0.2275	0.6663	0	0	0
53	25do p24h.nd2	1.9626	1.2118	1.5438	0	0	0
54	25do p24h.nd2	0.3937	0.2424	0.3102	0	0	0
55	25do p24h.nd2	1.608	1.0361	1.2297	0	0	0
56	25do p24h.nd2	1.2255	1.0743	0.5898	0	0	0
57	25do p24h.nd2	0.7249	0.7249	0	0	0	0
58	25do p24h.nd2	0	0	0	0	0	0
59	25do p24h.nd2	0	0	0	0	0	0
60	25do p24h.nd2	1.4301	1.3951	0.3144	0	0	0
61	25do p24h.nd2	0.3781	0.3781	0	0	0	0
62	25do p24h.nd2	0	0	0	0	0	0
63	25do p24h.nd2	0	0	0	0	0	0
64	25do p24h.nd2	0	0	0	0	0	0
65	25do p24h.nd2	0	0	0	0	0	0
66	25do p24h.nd2	1.7238	0.358	1.6862	0	0	0
67	25do p24h.nd2	1.1278	0.4964	1.0127	0	0	0
68	25do p24h.nd2	1.0572	0.2994	1.0139	0	0	0
69	25do p24h.nd2	2.1241	0.6274	2.0294	0	0	0
70	25do p24h.nd2	1.8614	0.7756	1.6921	0	0	0
71	25do p24h.nd2	0	0	0	0	0	0
72	25do p24h.nd2	0.7771	0.3816	0.677	0	0	0
73	25do p24h.nd2	0.9541	0.6727	0.6765	0	0	0
74	25do p24h.nd2	1.4233	0.4495	1.3505	0	0	0
75	25do p24h.nd2	0.7011	0.1911	0.6745	0	0	0
76	25do p24h.nd2	1.5964	0.8573	1.3466	0	0	0
77	25do p24h.nd2	1.5132	0.6905	1.3464	0	0	0
78	25do p24h.nd2	0.3698	0.1566	0.335	0	0	0
79	25do p24h.nd2	1.1293	0.5158	1.0046	0	0	0
80	25do p24h.nd2	1.1027	0.4601	1.0021	0	0	0
81	25do p24h.nd2	1.4086	1.3693	0.3304	0	0	0
82	25do p24h.nd2	1.0163	0.2338	0.989	0	0	0
83	25do p24h.nd2	0.5218	0.1017	0.5118	0	0	0
84	25do p24h.nd2	1.0326	1.0326	0.0025	0	0	0
85	25do p24h.nd2	0.3457	0.2318	0.2565	0	0	0
86	25do p24h.nd2	3.6716	1.4932	3.3542	0	0	0
87	25do p24h.nd2	0.2591	0.0164	0.2586	0	0	0
88	25do p24h.nd2	0.5471	0.5471	0	0	0	0
89	25do p24h.nd2	0.7348	0.2845	0.6775	0	0	0
90	25do p24h.nd2	0.84	0.84	0	0	0	0
91	25do p24h.nd2	0	0	0	0	0	0
92	25do p24h.nd2	0.4925	0.4925	0	0	0	0
93	25do p24h.nd2	1.1643	1.1643	0	0	0	0
94	25do p24h.nd2	2.2981	1.5612	1.6864	0	0	0
95	25do p24h.nd2	2.5464	1.5497	2.0205	0	0	0
96	25do p24h.nd2	1.5999	1.5636	0.3387	0	0	0
97	25do p24h.nd2	1.4255	0.4863	1.3399	0	0	0
98	25do p24h.nd2	2.399	1.325	1.9999	0	0	0
99	25do p24h.nd2	0.5724	0.4666	0.3316	0	0	0
100	25do p24h.nd2	0.932	0.8727	0.3271	0	0	0
101	25do p24h.nd2	0.6332	0.6332	0	0	0	0
102	25do p24h.nd2	0.9621	0.9621	0	0	0	0
103	25do p24h.nd2	0.9529	0.9529	0	0	0	0
104	25do p24h.nd2	1.4248	0.6101	1.2876	0	0	0
105	25do p24h.nd2	0.5285	0.4207	0.3199	0	0	0
106	25do p24h.nd2	0.6933	0.2791	0.6347	0	0	0
107	25do p24h.nd2	0.5706	0.5706	0	0	0	0
108	25do p24h.nd2	0.4708	0.3522	0.3124	0	0	0
109	25do p24h.nd2	0.9625	0.2537	0.9285	0	0	0
110	25do p24h.nd2	2.3679	1.0039	2.1446	0	0	0
111	25do p24h.nd2	2.8733	0.9259	2.7201	0	0	0
112	25do p24h.nd2	0.4294	0.2752	0.3296	0	0	0
113	25do p24h.nd2	2.7998	0.988	2.6196	0	0	0
114	25do p24h.nd2	0.8188	0.8188	0	0	0	0
115	25do p24h.nd2	0.1162	0.1162	0	0	0	0
116	25do p24h.nd2	0	0	0	0	0	0
117	25do p24h.nd2	1.6623	0.4602	1.5973	0	0	0
118	25do p24h.nd2	0.5084	0.398	0.3163	0	0	0
119	25do p24h.nd2	0.0964	0.0964	0	0	0	0
120	25do p24h.nd2	0.2178	0.2178	0	0	0	0
121	25do p24h.nd2	0	0	0	0	0	0
122	25do p24h.nd2	0.2929	0.2929	0.0001	0	0	0
123	25do p24h.nd2	0.2945	0.2945	0.0001	0	0	0
124	25do p24h.nd2	0	0	0	0	0	0
125	25do p24h.nd2	1.7285	0.6027	1.6201	0	0	0
126	25do p24h.nd2	0.6142	0.59	0.1705	0	0	0
127	25do p24h.nd2	0.2783	0.2783	0.0012	0	0	0
128	25do p24h.nd2	0.4657	0.4361	0.1633	0	0	0
129	25do p24h.nd2	0.1977	0.1977	1e-05	0	0	0
130	25do p24h.nd2	0.2223	0.2223	0.0001	0	0	0
131	25do p24h.nd2	0	0	0	0	0	0
132	25do p24h.nd2	0	0	0	0	0	0
133	25do p24h.nd2	0.447	0.447	0.0001	0	0	0
134	25do p24h.nd2	0.5163	0.5163	0.0003	0	0	0
135	25do p24h.nd2	0.3208	0.3208	0.0002	0	0	0
136	25do p24h.nd2	0.695	0.6137	0.3261	0	0	0
137	25do p24h.nd2	0.5741	0.5741	0.0003	0	0	0
138	25do p24h.nd2	0.7422	0.3752	0.6404	0	0	0
139	25do p24h.nd2	0	0	0	0	0	0
140	25do p24h.nd2	0.2276	0.2276	0.0002	0	0	0
141	25do p24h.nd2	1.8658	1.8658	0.0005	0	0	0
142	25do p24h.nd2	2.4469	2.4469	0.0009	0	0	0
143	25do p24h.nd2	0.8358	0.8358	0.0002	0	0	0
144	25do p24h.nd2	0	0	0	0	0	0
145	25do p24h.nd2	0	0	0	0	0	0
146	25do p24h.nd2	0.0958	0.0958	0.0001	0	0	0
147	25do p24h.nd2	0.6841	0.2666	0.63	0	0	0
148	25do p24h.nd2	0.0966	0.0966	0.0001	0	0	0
149	25do p24h.nd2	0	0	0	0	0	0
150	25do p24h.nd2	1.0193	0.4341	0.9222	0	0	0
151	25do p24h.nd2	1.616	1.5865	0.3077	0	0	0
152	25do p24h.nd2	0.3006	0.3006	0.0001	0	0	0
153	25do p24h.nd2	0.932	0.932	3e-05	0	0	0
154	25do p24h.nd2	0.5098	0.5098	5e-05	0	0	0
155	25do p24h.nd2	0.687	0.687	0.0002	0	0	0
156	25do p24h.nd2	2.254	2.2312	0.3197	0	0	0
Feature	Mean	St.Dev	Minimum	Maximum
Length xyz	0.8964	1.1272	0	8.8981
Length xy	0.5865	0.8183	0	8.3001
Height	0.492	0.9047	0	5.7623
Item	Source	Length xyz	Length xy	Height	ND.T	ND.Z	ND.M	Comment
1	25do p24h.nd2	0.3238	0.3238	0	0	0	0
2	25do p24h.nd2	0.4571	0.3259	0.3204	0	0	0
3	25do p24h.nd2	1.4888	0.7404	1.2917	0	0	0
4	25do p24h.nd2	1.7784	0.7102	1.6304	0	0	0
5	25do p24h.nd2	0.8605	0.5545	0.6581	0	0	0
6	25do p24h.nd2	0.6933	0.2312	0.6536	0	0	0
7	25do p24h.nd2	1.2083	1.2083	0.0014	0	0	0
8	25do p24h.nd2	1.1313	0.5279	1.0005	0	0	0
9	25do p24h.nd2	1.7093	0.3256	1.678	0	0	0
10	25do p24h.nd2	1.2723	1.2723	0	0	0	0
11	25do p24h.nd2	3.1013	0.6289	3.0368	0	0	0
12	25do p24h.nd2	0.4072	0.4072	0	0	0	0
13	25do p24h.nd2	0.1986	0.1986	4e-05	0	0	0
14	25do p24h.nd2	0.4575	0.3062	0.3399	0	0	0
15	25do p24h.nd2	0.9064	0.8395	0.3418	0	0	0
16	25do p24h.nd2	0.282	0.282	0.0004	0	0	0
17	25do p24h.nd2	0	0	0	0	0	0
18	25do p24h.nd2	1.6479	0.9198	1.3673	0	0	0
19	25do p24h.nd2	0	0	0	0	0	0
20	25do p24h.nd2	0.4974	0.4974	0.0004	0	0	0
21	25do p24h.nd2	0.296	0.296	0	0	0	0
22	25do p24h.nd2	0.788	0.3926	0.6832	0	0	0
23	25do p24h.nd2	0.1994	0.1994	0.0003	0	0	0
24	25do p24h.nd2	0.5154	0.3866	0.3407	0	0	0
25	25do p24h.nd2	0.4942	0.4942	0	0	0	0
26	25do p24h.nd2	0	0	0	0	0	0
27	25do p24h.nd2	0.0981	0.0981	0	0	0	0
28	25do p24h.nd2	0.3446	0.0689	0.3377	0	0	0
29	25do p24h.nd2	0.693	0.693	0	0	0	0
30	25do p24h.nd2	0.0991	0.0991	0	0	0	0
31	25do p24h.nd2	0	0	0	0	0	0
32	25do p24h.nd2	0	0	0	0	0	0
33	25do p24h.nd2	0	0	0	0	0	0
34	25do p24h.nd2	0.4332	0.4332	0.0001	0	0	0
35	25do p24h.nd2	0.091	0.091	0	0	0	0
36	25do p24h.nd2	1.4939	1.4939	0	0	0	0
37	25do p24h.nd2	0.1851	0.1851	0.0004	0	0	0
38	25do p24h.nd2	3.6754	0.7686	3.5942	0	0	0
39	25do p24h.nd2	0.7073	0.2823	0.6485	0	0	0
40	25do p24h.nd2	0.432	0.2874	0.3225	0	0	0
41	25do p24h.nd2	1.0302	1.0302	0	0	0	0
42	25do p24h.nd2	1.1452	1.1452	0	0	0	0
43	25do p24h.nd2	0.4298	0.4298	0	0	0	0
44	25do p24h.nd2	2.2178	1.0318	1.9631	0	0	0
45	25do p24h.nd2	1.6117	1.6117	0	0	0	0
46	25do p24h.nd2	1.1026	1.1026	0	0	0	0
47	25do p24h.nd2	0.1181	0.1181	0	0	0	0
48	25do p24h.nd2	1.1346	0.6182	0.9514	0	0	0
49	25do p24h.nd2	2.1116	0.8932	1.9134	0	0	0
50	25do p24h.nd2	2.2121	1.1479	1.891	0	0	0
51	25do p24h.nd2	0.4096	0.2594	0.317	0	0	0
52	25do p24h.nd2	0.3411	0.3411	0	0	0	0
53	25do p24h.nd2	4.2529	3.1814	2.8223	0	0	0
54	25do p24h.nd2	0	0	0	0	0	0
55	25do p24h.nd2	0.4571	0.4571	0	0	0	0
56	25do p24h.nd2	0	0	0	0	0	0
57	25do p24h.nd2	0.1141	0.1141	0	0	0	0
58	25do p24h.nd2	0.3422	0.3422	0	0	0	0
59	25do p24h.nd2	0.2287	0.2287	0	0	0	0
60	25do p24h.nd2	0.2288	0.2288	0	0	0	0
61	25do p24h.nd2	0.3116	0.0474	0.308	0	0	0
62	25do p24h.nd2	0.7276	0.6602	0.3057	0	0	0
63	25do p24h.nd2	0.3622	0.3622	0	0	0	0
64	25do p24h.nd2	0	0	0	0	0	0
65	25do p24h.nd2	0.115	0.115	0	0	0	0
66	25do p24h.nd2	0.4623	0.3507	0.3012	0	0	0
67	25do p24h.nd2	0	0	0	0	0	0
68	25do p24h.nd2	0	0	0	0	0	0
69	25do p24h.nd2	0.6834	0.6578	0.1855	0	0	0
70	25do p24h.nd2	0	0	0	0	0	0
71	25do p24h.nd2	0	0	0	0	0	0
72	25do p24h.nd2	0.3271	0.3271	0.0016	0	0	0
73	25do p24h.nd2	0.3207	0.3207	0	0	0	0
74	25do p24h.nd2	0.7294	0.5146	0.517	0	0	0
75	25do p24h.nd2	0.4489	0.4489	0.0005	0	0	0
76	25do p24h.nd2	0.3317	0.2012	0.2637	0	0	0
77	25do p24h.nd2	0.3115	0.3115	0	0	0	0
78	25do p24h.nd2	0	0	0	0	0	0
79	25do p24h.nd2	3.0588	1.8349	2.4473	0	0	0
80	25do p24h.nd2	0.3007	0.3007	0	0	0	0
81	25do p24h.nd2	0.4517	0.4517	0.0006	0	0	0
82	25do p24h.nd2	1.8025	1.1439	1.393	0	0	0
83	25do p24h.nd2	0.6101	0.6101	0	0	0	0
84	25do p24h.nd2	0.5837	0.1769	0.5563	0	0	0
85	25do p24h.nd2	0.3339	0.1797	0.2814	0	0	0
86	25do p24h.nd2	0.0879	0.0879	0.0004	0	0	0
87	25do p24h.nd2	0.3075	0.1118	0.2864	0	0	0
88	25do p24h.nd2	1.5048	0.9665	1.1534	0	0	0
89	25do p24h.nd2	0.0841	0.0841	0.0001	0	0	0
90	25do p24h.nd2	3.7122	2.3043	2.9104	0	0	0
91	25do p24h.nd2	0.5226	0.5226	0	0	0	0
92	25do p24h.nd2	2.5303	1.1037	2.2769	0	0	0
93	25do p24h.nd2	3.0416	3.0416	0	0	0	0
94	25do p24h.nd2	0.2976	0.0684	0.2896	0	0	0
95	25do p24h.nd2	0.3051	0.0947	0.29	0	0	0
96	25do p24h.nd2	0.7982	0.5499	0.5786	0	0	0
97	25do p24h.nd2	0.728	0.4342	0.5843	0	0	0
98	25do p24h.nd2	0.4086	0.4086	0	0	0	0
99	25do p24h.nd2	1.3205	0.6065	1.173	0	0	0
100	25do p24h.nd2	0.2831	0.0025	0.2831	0	0	0
101	25do p24h.nd2	0	0	0	0	0	0
102	25do p24h.nd2	0.5655	0.4878	0.2861	0	0	0
103	25do p24h.nd2	6.7449	2.9562	6.0625	0	0	0
104	25do p24h.nd2	0	0	0	0	0	0
105	25do p24h.nd2	0.3195	0.3194	0.004	0	0	0
106	25do p24h.nd2	0	0	0	0	0	0
107	25do p24h.nd2	0.9191	0.3101	0.8652	0	0	0
108	25do p24h.nd2	0.3464	0.3464	0	0	0	0
109	25do p24h.nd2	2.4339	1.2979	2.059	0	0	0
110	25do p24h.nd2	0.8975	0.57	0.6933	0	0	0
111	25do p24h.nd2	0.6497	0.4506	0.4681	0	0	0
112	25do p24h.nd2	0.5672	0.3056	0.4778	0	0	0
113	25do p24h.nd2	0.508	0.4472	0.2411	0	0	0
114	25do p24h.nd2	0.9309	0.7949	0.4845	0	0	0
115	25do p24h.nd2	1.5046	0.8593	1.2351	0	0	0
116	25do p24h.nd2	2.5231	1.5335	2.0036	0	0	0
117	25do p24h.nd2	0.2869	0.1307	0.2555	0	0	0
118	25do p24h.nd2	3.2165	1.943	2.5633	0	0	0
119	25do p24h.nd2	1.3908	1.2958	0.5051	0	0	0
120	25do p24h.nd2	1.3971	0.5232	1.2954	0	0	0
121	25do p24h.nd2	0.4921	0.4122	0.2688	0	0	0
122	25do p24h.nd2	6.6714	3.8301	5.4624	0	0	0
123	25do p24h.nd2	0.954	0.8009	0.5184	0	0	0
124	25do p24h.nd2	1.8691	1.3377	1.3055	0	0	0
125	25do p24h.nd2	0	0	0	0	0	0
126	25do p24h.nd2	4.3784	2.3828	3.6733	0	0	0
127	25do p24h.nd2	0.5266	0.0433	0.5249	0	0	0
128	25do p24h.nd2	0.2089	0.2089	0.0001	0	0	0
129	25do p24h.nd2	0.2248	0.2248	0.002	0	0	0
130	25do p24h.nd2	4.2597	2.1935	3.6515	0	0	0
131	25do p24h.nd2	0.5215	0.0522	0.5189	0	0	0
132	25do p24h.nd2	0.4992	0.4296	0.2541	0	0	0
133	25do p24h.nd2	1.1469	0.8561	0.7631	0	0	0
134	25do p24h.nd2	0.3668	0.3668	0.0043	0	0	0
135	25do p24h.nd2	0.2774	0.2774	0.0007	0	0	0
136	25do p24h.nd2	0.4282	0.3407	0.2594	0	0	0
137	25do p24h.nd2	3.1851	1.9245	2.5379	0	0	0
138	25do p24h.nd2	3.4688	2.0693	2.7841	0	0	0
139	25do p24h.nd2	2.849	1.3441	2.512	0	0	0
140	25do p24h.nd2	1.9692	1.5258	1.2448	0	0	0
141	25do p24h.nd2	0.1861	0.1861	0	0	0	0
142	25do p24h.nd2	3.3856	2.0571	2.6889	0	0	0
143	25do p24h.nd2	3.4407	2.4608	2.4047	0	0	0
144	25do p24h.nd2	0.505	0.4447	0.2394	0	0	0
145	25do p24h.nd2	2.7299	1.7038	2.1329	0	0	0
146	25do p24h.nd2	1.5854	1.57	0.2205	0	0	0
Feature	Mean	St.Dev	Minimum	Maximum
Length xyz	1.0919	1.4723	0	8.4123
Length xy	0.6429	0.7224	0	3.8301
Height	0.775	1.3505	0	8.2786

## Sheet: U-Fmi
Item	Source	Length xyz	Length xy	Height	ND.T	ND.Z	ND.M	Comment
1	25do p24h.nd2	30.77	30.77	0	0	0	0
2	25do p24h.nd2	28.57	28.55	1.19	0	0	0
3	25do p24h.nd2	26.43	26.37	1.69	0	0	0
4	25do p24h.nd2	4.72	1.14	4.58	0	0	0
5	25do p24h.nd2	10.43	9.82	3.51	0	0	0
6	25do p24h.nd2	10.94	10.37	3.46	0	0	0
7	25do p24h.nd2	6.55	6.55	0	0	0	0
8	25do p24h.nd2	27.91	27.91	0.49	0	0	0
9	25do p24h.nd2	19.73	19.68	1.44	0	0	0
10	25do p24h.nd2	3.19	2.98	1.12	0	0	0
11	25do p24h.nd2	12.09	11.66	3.2	0	0	0				length	sample1	sample2	sample3	sample4	total
12	25do p24h.nd2	7.06	5.53	4.38	0	0	0				5	31	25	30	31	117
13	25do p24h.nd2	10.48	9.55	4.32	0	0	0				15	58	56	58	67	239
14	25do p24h.nd2	16.7	15.84	5.32	0	0	0				35	30	47	32	37	146
15	25do p24h.nd2	24.01	23.93	1.94	0	0	0				35~	2	6	11	7	26
16	25do p24h.nd2	17.43	16.93	4.14	0	0	0					#N/A	#N/A	#N/A	#N/A
17	25do p24h.nd2	1.47	1.01	1.07	0	0	0					#N/A	#N/A	#N/A	#N/A
18	25do p24h.nd2	21.09	19.81	7.24	0	0	0					#N/A	#N/A	#N/A	#N/A
19	25do p24h.nd2	20.69	20.47	3.07	0	0	0					#N/A	#N/A	#N/A	#N/A
20	25do p24h.nd2	10.75	9.95	4.09	0	0	0					#N/A	#N/A	#N/A	#N/A
21	25do p24h.nd2	2.88	2.69	1.02	0	0	0					#N/A	#N/A	#N/A	#N/A	#N/A
22	25do p24h.nd2	10.54	10.54	0.01	0	0	0					#N/A	#N/A	#N/A	#N/A
23	25do p24h.nd2	24.23	24.23	0.01	0	0	0					#N/A	#N/A	#N/A	#N/A	#N/A
24	25do p24h.nd2	9.63	9.58	1	0	0	0					#N/A	#N/A	#N/A	#N/A
25	25do p24h.nd2	11.14	11.1	0.97	0	0	0					#N/A	#N/A	#N/A	#N/A
26	25do p24h.nd2	6.87	6.8	0.98	0	0	0
27	25do p24h.nd2	23.94	22.63	7.8	0	0	0			total length	6965.3
28	25do p24h.nd2	21.96	21.8	2.64	0	0	0			total axon number	528
29	25do p24h.nd2	6.42	6.34	1.01	0	0	0			Average length	13.1918560606061
30	25do p24h.nd2	9.03	8.81	1.98	0	0	0
31	25do p24h.nd2	3.61	3.61	0.004	0	0	0
32	25do p24h.nd2	4.28	4.17	0.97	0	0	0
33	25do p24h.nd2	8.27	8.21	1.04	0	0	0
34	25do p24h.nd2	8.86	8.86	0	0	0	0
35	25do p24h.nd2	37.39	37.11	4.58	0	0	0
36	25do p24h.nd2	4.63	4	2.32	0	0	0
37	25do p24h.nd2	28.97	28.39	5.77	0	0	0
38	25do p24h.nd2	24.8	24.8	0	0	0	0
39	25do p24h.nd2	5.35	5.35	0	0	0	0
40	25do p24h.nd2	8.99	8.99	0	0	0	0
41	25do p24h.nd2	8.48	8.48	0	0	0	0
42	25do p24h.nd2	9.99	9.93	1.13	0	0	0
43	25do p24h.nd2	11.58	11.58	0	0	0	0
44	25do p24h.nd2	9.82	9.76	1.17	0	0	0
45	25do p24h.nd2	5.46	5.46	0	0	0	0
46	25do p24h.nd2	4.36	4.36	0	0	0	0
47	25do p24h.nd2	2.05	1.68	1.18	0	0	0
48	25do p24h.nd2	1.45	0.85	1.18	0	0	0
49	25do p24h.nd2	4.85	1.13	4.71	0	0	0
50	25do p24h.nd2	9.74	7.78	5.87	0	0	0
51	25do p24h.nd2	12.74	12.74	0.03	0	0	0
52	25do p24h.nd2	16.54	16.37	2.36	0	0	0
53	25do p24h.nd2	5.98	5.86	1.19	0	0	0
54	25do p24h.nd2	0.15	0.15	0.0008	0	0	0
55	25do p24h.nd2	14.74	14.55	2.39	0	0	0
56	25do p24h.nd2	1.97	1.97	0.01	0	0	0
57	25do p24h.nd2	1.03	1.03	0.003	0	0	0
58	25do p24h.nd2	7.17	6.79	2.3	0	0	0
59	25do p24h.nd2	8.74	8.03	3.44	0	0	0
60	25do p24h.nd2	16.08	15.89	2.43	0	0	0
61	25do p24h.nd2	17.93	17.89	1.19	0	0	0
62	25do p24h.nd2	7.16	7.16	0.02	0	0	0
63	25do p24h.nd2	19.78	19.75	1.15	0	0	0
64	25do p24h.nd2	13.12	12.92	2.3	0	0	0
65	25do p24h.nd2	14.53	14.48	1.13	0	0	0
66	25do p24h.nd2	1.31	0.62	1.16	0	0	0
67	25do p24h.nd2	8.36	8.27	1.22	0	0	0
68	25do p24h.nd2	6.88	6.79	1.16	0	0	0
69	25do p24h.nd2	13.94	13.9	0.97	0	0	0
70	25do p24h.nd2	0.62	0.62	0	0	0	0
71	25do p24h.nd2	3.6	2.75	2.33	0	0	0
72	25do p24h.nd2	2.66	1.25	2.35	0	0	0
73	25do p24h.nd2	2.61	1.13	2.35	0	0	0
74	25do p24h.nd2	1.24	0.37	1.18	0	0	0
75	25do p24h.nd2	0	0	0	0	0	0
76	25do p24h.nd2	4.26	4.26	0	0	0	0
77	25do p24h.nd2	0.47	0.47	0	0	0	0
78	25do p24h.nd2	29.57	29.54	1.15	0	0	0
79	25do p24h.nd2	30.79	30.71	2.29	0	0	0
80	25do p24h.nd2	10.98	10.92	1.17	0	0	0
81	25do p24h.nd2	7.59	7.5	1.18	0	0	0
82	25do p24h.nd2	35.65	35	6.75	0	0	0
83	25do p24h.nd2	9.48	8.79	3.53	0	0	0
84	25do p24h.nd2	13.49	13.49	0	0	0	0
85	25do p24h.nd2	8.67	4.91	7.14	0	0	0
86	25do p24h.nd2	6.33	5.86	2.38	0	0	0
87	25do p24h.nd2	16.1	13.06	9.4	0	0	0
88	25do p24h.nd2	6.05	5.57	2.36	0	0	0
89	25do p24h.nd2	7.92	7.08	3.55	0	0	0
90	25do p24h.nd2	1.3	1.3	0	0	0	0
91	25do p24h.nd2	10.61	10.54	1.19	0	0	0
92	25do p24h.nd2	17.26	16.59	4.74	0	0	0
93	25do p24h.nd2	12.84	10.75	7.02	0	0	0
94	25do p24h.nd2	32.38	32.37	0.99	0	0	0
95	25do p24h.nd2	7.48	7.38	1.17	0	0	0
96	25do p24h.nd2	8.95	8.87	1.17	0	0	0
97	25do p24h.nd2	7.67	6.87	3.41	0	0	0
98	25do p24h.nd2	10.99	10.43	3.46	0	0	0
99	25do p24h.nd2	2.18	2.18	0	0	0	0
100	25do p24h.nd2	6.18	6.06	1.17	0	0	0
101	25do p24h.nd2	11.09	10.83	2.39	0	0	0
102	25do p24h.nd2	41.49	40.47	9.11	0	0	0
103	25do p24h.nd2	17.41	14.62	9.45	0	0	0
104	25do p24h.nd2	12.86	12.8	1.18	0	0	0
105	25do p24h.nd2	40.42	40.19	4.28	0	0	0
106	25do p24h.nd2	13.36	11.3	7.13	0	0	0
107	25do p24h.nd2	38.65	38.65	0.58	0	0	0
108	25do p24h.nd2	14.76	14.72	1.07	0	0	0
109	25do p24h.nd2	4.75	4.15	2.31	0	0	0
110	25do p24h.nd2	24.32	24.29	1.19	0	0	0
111	25do p24h.nd2	20.88	20.88	0	0	0	0
112	25do p24h.nd2	39.32	39.3	1.22	0	0	0
113	25do p24h.nd2	34.35	34.35	0.07	0	0	0
114	25do p24h.nd2	18.16	18.01	2.32	0	0	0
115	25do p24h.nd2	0.8	0.8	0.002	0	0	0
116	25do p24h.nd2	4.13	4.13	0.01	0	0	0
117	25do p24h.nd2	1.1	1.1	0.002	0	0	0
118	25do p24h.nd2	28.47	28.09	4.63	0	0	0
119	25do p24h.nd2	12.3	11.79	3.49	0	0	0
120	25do p24h.nd2	18.76	17.83	5.84	0	0	0
121	25do p24h.nd2	10.97	10.71	2.37	0	0	0
122	25do p24h.nd2	4.54	4.54	0.004	0	0	0
123	25do p24h.nd2	7.65	6.01	4.74	0	0	0
124	25do p24h.nd2	36.05	36.05	0.03	0	0	0
125	25do p24h.nd2	8.11	8.11	0.01	0	0	0
126	25do p24h.nd2	9.97	9.9	1.21	0	0	0
127	25do p24h.nd2	3.74	3.74	0.004	0	0	0
128	25do p24h.nd2	12.67	12.62	1.2	0	0	0
129	25do p24h.nd2	21.27	21.14	2.38	0	0	0
130	25do p24h.nd2	8.86	8.53	2.4	0	0	0
131	25do p24h.nd2	9.75	9.75	0.02	0	0	0
132	25do p24h.nd2	13.01	13.01	0.02	0	0	0
133	25do p24h.nd2	8.54	8.47	1.08	0	0	0
134	25do p24h.nd2	21.19	20.53	5.23	0	0	0
135	25do p24h.nd2	18.07	17.8	3.09	0	0	0
136	25do p24h.nd2	19.69	19.69	0.06	0	0	0
137	25do p24h.nd2	12.06	12.01	1.07	0	0	0
138	25do p24h.nd2	14.53	14.53	0.02	0	0	0
139	25do p24h.nd2	12.09	9.92	6.91	0	0	0
140	25do p24h.nd2	9.82	7.5	6.34	0	0	0
141	25do p24h.nd2	22.31	22.23	1.92	0	0	0
142	25do p24h.nd2	16.75	16.75	0.09	0	0	0
Feature	Mean	St.Dev	Minimum	Maximum
Length xyz	12.98	9.73	0	41.49
Length xy	12.55	9.82	0	40.47
Height	2.1	2.24	0	9.45
Item	Source	Length xyz	Length xy	Height	ND.T	ND.Z	ND.M	Comment
1	25do p24h.nd2	38.13	37.97	3.48	0	0	0
2	25do p24h.nd2	29.44	29.1	4.41	0	0	0
3	25do p24h.nd2	26.57	25.98	5.56	0	0	0
4	25do p24h.nd2	15.27	15.27	0.02	0	0	0
5	25do p24h.nd2	20.85	20.83	1.05	0	0	0
6	25do p24h.nd2	4.67	4.67	0.002	0	0	0
7	25do p24h.nd2	7.23	7.14	1.13	0	0	0
8	25do p24h.nd2	2.5	2.5	0.003	0	0	0
9	25do p24h.nd2	34.4	34.25	3.23	0	0	0
10	25do p24h.nd2	10.29	9.73	3.36	0	0	0
11	25do p24h.nd2	17.52	17.48	1.03	0	0	0
12	25do p24h.nd2	20.41	20.29	2.16	0	0	0
13	25do p24h.nd2	9.06	9.06	0.01	0	0	0
14	25do p24h.nd2	10.33	9.82	3.2	0	0	0
15	25do p24h.nd2	11.52	11.07	3.18	0	0	0
16	25do p24h.nd2	13.34	12.99	3.05	0	0	0
17	25do p24h.nd2	8.7	8.16	3	0	0	0
18	25do p24h.nd2	10.81	10.76	1.11	0	0	0
19	25do p24h.nd2	7.1	5.67	4.27	0	0	0
20	25do p24h.nd2	1.46	1	1.06	0	0	0
21	25do p24h.nd2	10.18	9.25	4.24	0	0	0
22	25do p24h.nd2	6.36	6	2.09	0	0	0
23	25do p24h.nd2	1.46	1.46	0.01	0	0	0
24	25do p24h.nd2	10.04	9.77	2.33	0	0	0
25	25do p24h.nd2	9.14	9.07	1.13	0	0	0
26	25do p24h.nd2	14.63	14.63	0.25	0	0	0
27	25do p24h.nd2	13.78	13.39	3.27	0	0	0
28	25do p24h.nd2	41.36	41.05	5.01	0	0	0
29	25do p24h.nd2	14.17	14	2.2	0	0	0
30	25do p24h.nd2	19.05	19.01	1.16	0	0	0
31	25do p24h.nd2	33.54	33.28	4.2	0	0	0
32	25do p24h.nd2	4.94	4.94	0.01	0	0	0
33	25do p24h.nd2	10.48	9.97	3.23	0	0	0
34	25do p24h.nd2	8.61	8.54	1.1	0	0	0
35	25do p24h.nd2	40.51	40.51	0.07	0	0	0
36	25do p24h.nd2	6.61	6.61	0.03	0	0	0
37	25do p24h.nd2	21.55	21.55	0	0	0	0
38	25do p24h.nd2	13.85	13.85	0.03	0	0	0
39	25do p24h.nd2	41.21	41.21	0	0	0	0
40	25do p24h.nd2	46.02	45.87	3.64	0	0	0
41	25do p24h.nd2	11.69	10.7	4.7	0	0	0
42	25do p24h.nd2	15.62	15.58	1.18	0	0	0
43	25do p24h.nd2	19.44	19.13	3.42	0	0	0
44	25do p24h.nd2	21.48	20.7	5.74	0	0	0
45	25do p24h.nd2	11.15	11.15	0.01	0	0	0
46	25do p24h.nd2	17.37	17.37	0.01	0	0	0
47	25do p24h.nd2	0	0	0	0	0	0
48	25do p24h.nd2	13.6	13.39	2.35	0	0	0
49	25do p24h.nd2	0	0	0	0	0	0
50	25do p24h.nd2	4.4	0.67	4.35	0	0	0
51	25do p24h.nd2	0.13	0.13	0.0004	0	0	0
52	25do p24h.nd2	16.38	16.35	0.99	0	0	0
53	25do p24h.nd2	6.16	6.16	0	0	0	0
54	25do p24h.nd2	12.92	12.92	0	0	0	0
55	25do p24h.nd2	14.54	12.76	6.98	0	0	0
56	25do p24h.nd2	7.35	5.63	4.72	0	0	0
57	25do p24h.nd2	33.94	33.91	1.34	0	0	0
58	25do p24h.nd2	12.8	12.74	1.2	0	0	0
59	25do p24h.nd2	11.15	11.09	1.15	0	0	0
60	25do p24h.nd2	13.68	12.83	4.73	0	0	0
61	25do p24h.nd2	11.45	11.45	0	0	0	0
62	25do p24h.nd2	14.24	13.45	4.67	0	0	0
63	25do p24h.nd2	8.7	7.35	4.67	0	0	0
64	25do p24h.nd2	7.7	7.7	0	0	0	0
65	25do p24h.nd2	1.61	1.31	0.93	0	0	0
66	25do p24h.nd2	22.12	21.89	3.17	0	0	0
67	25do p24h.nd2	11.14	11.09	1.05	0	0	0
68	25do p24h.nd2	12.96	12.96	0.05	0	0	0
69	25do p24h.nd2	11.08	10.92	1.9	0	0	0
70	25do p24h.nd2	29.24	28.95	4.09	0	0	0
71	25do p24h.nd2	6.31	6.24	0.9	0	0	0
72	25do p24h.nd2	13.21	13.16	1.18	0	0	0
73	25do p24h.nd2	17.89	17.85	1.18	0	0	0
74	25do p24h.nd2	11.97	11.91	1.17	0	0	0
75	25do p24h.nd2	24.14	24.03	2.35	0	0	0
76	25do p24h.nd2	40.55	40.54	1.09	0	0	0
77	25do p24h.nd2	22.97	22.22	5.8	0	0	0
78	25do p24h.nd2	7.16	6.27	3.45	0	0	0
79	25do p24h.nd2	32.44	32.44	0.49	0	0	0
80	25do p24h.nd2	13.7	12.44	5.73	0	0	0
81	25do p24h.nd2	16.69	16.61	1.56	0	0	0
82	25do p24h.nd2	34.91	34.36	6.17	0	0	0
83	25do p24h.nd2	33.47	33.46	0.91	0	0	0
84	25do p24h.nd2	49.6	49.59	1.34	0	0	0
85	25do p24h.nd2	7.74	7.66	1.08	0	0	0
86	25do p24h.nd2	9.02	9.02	0.07	0	0	0
87	25do p24h.nd2	0.14	0.14	0.001	0	0	0
88	25do p24h.nd2	0	0	0	0	0	0
89	25do p24h.nd2	0	0	0	0	0	0
90	25do p24h.nd2	4.26	4.12	1.06	0	0	0
91	25do p24h.nd2	13.84	13.8	1.04	0	0	0
92	25do p24h.nd2	32.39	32.39	0.45	0	0	0
93	25do p24h.nd2	6.57	5.58	3.47	0	0	0
94	25do p24h.nd2	0	0	0	0	0	0
95	25do p24h.nd2	9.99	9.99	0	0	0	0
96	25do p24h.nd2	12.7	12.7	0.01	0	0	0
97	25do p24h.nd2	6.25	5.17	3.51	0	0	0
98	25do p24h.nd2	3.53	0.46	3.5	0	0	0
99	25do p24h.nd2	4.67	4.53	1.15	0	0	0
100	25do p24h.nd2	8.94	8.66	2.21	0	0	0
101	25do p24h.nd2	0	0	0	0	0	0
102	25do p24h.nd2	26.14	26.12	1.03	0	0	0
103	25do p24h.nd2	1.93	1.59	1.09	0	0	0
104	25do p24h.nd2	10.88	10.82	1.13	0	0	0
105	25do p24h.nd2	17.51	17.36	2.28	0	0	0
106	25do p24h.nd2	18.8	18.8	0.19	0	0	0
107	25do p24h.nd2	26.83	26.73	2.3	0	0	0
108	25do p24h.nd2	35.51	35.51	0	0	0	0
109	25do p24h.nd2	38.39	38.39	0.07	0	0	0
110	25do p24h.nd2	40.47	40.31	3.56	0	0	0
111	25do p24h.nd2	9.06	8.75	2.33	0	0	0
112	25do p24h.nd2	5.9	5.9	0.01	0	0	0
113	25do p24h.nd2	2.94	2.69	1.19	0	0	0
114	25do p24h.nd2	0	0	0	0	0	0
115	25do p24h.nd2	7.85	7.85	0.02	0	0	0
116	25do p24h.nd2	8.52	8.18	2.37	0	0	0
117	25do p24h.nd2	13.19	13.19	0.01	0	0	0
118	25do p24h.nd2	15.76	15.36	3.51	0	0	0
119	25do p24h.nd2	35.58	35.58	0.004	0	0	0
120	25do p24h.nd2	0	0	0	0	0	0
121	25do p24h.nd2	0	0	0	0	0	0
122	25do p24h.nd2	0.98	0.98	0.004	0	0	0
123	25do p24h.nd2	12.39	12.16	2.38	0	0	0
124	25do p24h.nd2	2.1	2.1	0	0	0	0
125	25do p24h.nd2	3.88	3.88	0.002	0	0	0
126	25do p24h.nd2	3.3	3.3	0.02	0	0	0
127	25do p24h.nd2	0.42	0.42	0.003	0	0	0
128	25do p24h.nd2	0	0	0	0	0	0
129	25do p24h.nd2	0	0	0	0	0	0
130	25do p24h.nd2	22.47	22.47	0.28	0	0	0
131	25do p24h.nd2	13.27	13.24	0.93	0	0	0
Feature	Mean	St.Dev	Minimum	Maximum
Length xyz	14.2	11.75	0	49.6
Length xy	13.93	11.82	0	49.59
Height	1.66	1.77	0	6.98
Item	Source	Length xyz	Length xy	Height	ND.T	ND.Z	ND.M	Comment
1	25do p24h002.nd2	33.6	33.6	0	0	0	0
2	25do p24h002.nd2	32.32	32.32	0	0	0	0
3	25do p24h002.nd2	8.38	8.38	0.06	0	0	0
4	25do p24h002.nd2	39.28	39.28	0.19	0	0	0
5	25do p24h002.nd2	26.08	26.06	1.17	0	0	0
6	25do p24h002.nd2	30.66	30.63	1.37	0	0	0
7	25do p24h002.nd2	27.84	27.81	1.31	0	0	0
8	25do p24h002.nd2	31.9	31.75	3.13	0	0	0
9	25do p24h002.nd2	2.62	2.62	0.01	0	0	0
10	25do p24h002.nd2	31.48	31.23	4.03	0	0	0
11	25do p24h002.nd2	0.58	0.58	0.002	0	0	0
12	25do p24h002.nd2	5.73	4.01	4.09	0	0	0
13	25do p24h002.nd2	8.9	3.58	8.15	0	0	0
14	25do p24h002.nd2	13.1	11.93	5.4	0	0	0
15	25do p24h002.nd2	12.5	12.42	1.4	0	0	0
16	25do p24h002.nd2	18.33	16.38	8.21	0	0	0
17	25do p24h002.nd2	14.28	14.22	1.34	0	0	0
18	25do p24h002.nd2	22.65	21.17	8.04	0	0	0
19	25do p24h002.nd2	1.53	1.53	0	0	0	0
20	25do p24h002.nd2	15.71	14.17	6.78	0	0	0
21	25do p24h002.nd2	17.88	17.82	1.46	0	0	0
22	25do p24h002.nd2	20.69	20.69	0	0	0	0
23	25do p24h002.nd2	11.46	11.46	0	0	0	0
24	25do p24h002.nd2	2.71	2.37	1.33	0	0	0
25	25do p24h002.nd2	0.08	0.08	3e-05	0	0	0
26	25do p24h002.nd2	19.1	19.06	1.26	0	0	0
27	25do p24h002.nd2	22.43	21.14	7.5	0	0	0
28	25do p24h002.nd2	9.61	9.37	2.11	0	0	0
29	25do p24h002.nd2	0	0	0	0	0	0
30	25do p24h002.nd2	23.71	23.71	2e-05	0	0	0
31	25do p24h002.nd2	6.56	5.77	3.13	0	0	0
32	25do p24h002.nd2	0	0	0	0	0	0
33	25do p24h002.nd2	10.48	9.96	3.25	0	0	0
34	25do p24h002.nd2	16.87	16.52	3.44	0	0	0
35	25do p24h002.nd2	6.55	6.55	0.02	0	0	0
36	25do p24h002.nd2	21.46	21.15	3.64	0	0	0
37	25do p24h002.nd2	39.18	38.59	6.72	0	0	0
38	25do p24h002.nd2	27.3	27.3	0	0	0	0
39	25do p24h002.nd2	19.91	19.73	2.67	0	0	0
40	25do p24h002.nd2	10.57	9.76	4.05	0	0	0
41	25do p24h002.nd2	17.15	17.15	0	0	0	0
42	25do p24h002.nd2	14.87	14.3	4.07	0	0	0
43	25do p24h002.nd2	36.22	35.49	7.22	0	0	0
44	25do p24h002.nd2	18.12	18.12	0.07	0	0	0
45	25do p24h002.nd2	15.73	15.23	3.96	0	0	0
46	25do p24h002.nd2	10.43	9.59	4.11	0	0	0
47	25do p24h002.nd2	47.32	47.15	3.96	0	0	0
48	25do p24h002.nd2	8.81	8.81	0.0004	0	0	0
49	25do p24h002.nd2	5.04	4.85	1.36	0	0	0
50	25do p24h002.nd2	11.98	10.67	5.45	0	0	0
51	25do p24h002.nd2	0	0	0	0	0	0
52	25do p24h002.nd2	9.82	8.18	5.44	0	0	0
53	25do p24h002.nd2	8.7	8.59	1.39	0	0	0
54	25do p24h002.nd2	0.27	0.27	0	0	0	0
55	25do p24h002.nd2	6.61	3.97	5.29	0	0	0
56	25do p24h002.nd2	14.1	13.09	5.25	0	0	0
57	25do p24h002.nd2	12.45	10.59	6.55	0	0	0
58	25do p24h002.nd2	25.53	25.53	0.05	0	0	0
59	25do p24h002.nd2	7.34	7.23	1.29	0	0	0
60	25do p24h002.nd2	15.45	15.45	0.02	0	0	0
61	25do p24h002.nd2	27.19	27.05	2.68	0	0	0
62	25do p24h002.nd2	32.99	32.55	5.39	0	0	0
63	25do p24h002.nd2	16.23	16.23	0.01	0	0	0
64	25do p24h002.nd2	3.98	3.98	0	0	0	0
65	25do p24h002.nd2	7.28	7.28	0	0	0	0
66	25do p24h002.nd2	18.29	17.48	5.38	0	0	0
67	25do p24h002.nd2	7.51	7.51	0	0	0	0
68	25do p24h002.nd2	20.63	20.45	2.69	0	0	0
69	25do p24h002.nd2	15.79	14.28	6.73	0	0	0
70	25do p24h002.nd2	13.35	12.21	5.39	0	0	0
71	25do p24h002.nd2	10.49	10.49	0	0	0	0
72	25do p24h002.nd2	25.12	24.24	6.57	0	0	0
73	25do p24h002.nd2	18.39	17.16	6.61	0	0	0
74	25do p24h002.nd2	12.65	12.65	0	0	0	0
75	25do p24h002.nd2	12.53	10.53	6.79	0	0	0
76	25do p24h002.nd2	0	0	0	0	0	0
77	25do p24h002.nd2	0.09	0.09	0.0002	0	0	0
78	25do p24h002.nd2	10.97	10.97	0.09	0	0	0
79	25do p24h002.nd2	3.82	0.69	3.76	0	0	0
80	25do p24h002.nd2	20.73	20.31	4.14	0	0	0
81	25do p24h002.nd2	11.67	11.37	2.61	0	0	0
82	25do p24h002.nd2	9.6	8.78	3.88	0	0	0
83	25do p24h002.nd2	28.47	28.34	2.69	0	0	0
84	25do p24h002.nd2	15.49	15.44	1.22	0	0	0
85	25do p24h002.nd2	0	0	0	0	0	0
86	25do p24h002.nd2	0	0	0	0	0	0
87	25do p24h002.nd2	20.39	20.24	2.47	0	0	0
88	25do p24h002.nd2	15.62	14.83	4.92	0	0	0
89	25do p24h002.nd2	8.32	8.23	1.24	0	0	0
90	25do p24h002.nd2	17.19	17.15	1.21	0	0	0
91	25do p24h002.nd2	0.96	0.96	0.06	0	0	0
92	25do p24h002.nd2	11.51	11.51	0	0	0	0
93	25do p24h002.nd2	13.1	13.1	0.06	0	0	0
94	25do p24h002.nd2	12.44	12.44	0.004	0	0	0
95	25do p24h002.nd2	3.28	3.28	0.01	0	0	0
96	25do p24h002.nd2	3.84	1.64	3.47	0	0	0
97	25do p24h002.nd2	13.34	12.55	4.52	0	0	0
98	25do p24h002.nd2	10.91	9.92	4.54	0	0	0
99	25do p24h002.nd2	10.67	9.88	4.04	0	0	0
100	25do p24h002.nd2	8.19	8.19	0.04	0	0	0
101	25do p24h002.nd2	20.97	20.57	4.07	0	0	0
102	25do p24h002.nd2	16.09	16.09	0.002	0	0	0
103	25do p24h002.nd2	16	15.04	5.45	0	0	0
104	25do p24h002.nd2	54.55	54.28	5.41	0	0	0
105	25do p24h002.nd2	18.48	18.09	3.76	0	0	0
106	25do p24h002.nd2	14.4	13.84	3.97	0	0	0
107	25do p24h002.nd2	8.2	7.19	3.94	0	0	0
108	25do p24h002.nd2	14.28	14.21	1.33	0	0	0
109	25do p24h002.nd2	12.47	12.4	1.37	0	0	0
110	25do p24h002.nd2	34.67	34.57	2.71	0	0	0
111	25do p24h002.nd2	37.65	37.46	3.75	0	0	0
112	25do p24h002.nd2	0.28	0.28	0.002	0	0	0
113	25do p24h002.nd2	7.67	7.58	1.2	0	0	0
114	25do p24h002.nd2	9.19	9.11	1.2	0	0	0
115	25do p24h002.nd2	8.94	8.59	2.49	0	0	0
116	25do p24h002.nd2	9.7	9.63	1.18	0	0	0
117	25do p24h002.nd2	7.81	7.71	1.21	0	0	0
118	25do p24h002.nd2	6.18	5.64	2.52	0	0	0
119	25do p24h002.nd2	21.26	21.11	2.53	0	0	0
120	25do p24h002.nd2	15.82	15.77	1.18	0	0	0
121	25do p24h002.nd2	7.51	7.08	2.49	0	0	0
122	25do p24h002.nd2	12.54	12.49	1.16	0	0	0
123	25do p24h002.nd2	20.2	19.83	3.81	0	0	0
124	25do p24h002.nd2	8.28	7.89	2.51	0	0	0
125	25do p24h002.nd2	14.25	13.74	3.79	0	0	0
126	25do p24h002.nd2	10.45	10.13	2.56	0	0	0
127	25do p24h002.nd2	10.24	9.89	2.66	0	0	0
128	25do p24h002.nd2	30	29.97	1.37	0	0	0
129	25do p24h002.nd2	0	0	0	0	0	0
130	25do p24h002.nd2	1.34	0.59	1.2	0	0	0
131	25do p24h002.nd2	0.13	0.13	0.0001	0	0	0
132	25do p24h002.nd2	3.09	3.09	0.01	0	0	0
133	25do p24h002.nd2	3.89	3.89	0	0	0	0
134	25do p24h002.nd2	2.68	2.68	0	0	0	0
Feature	Mean	St.Dev	Minimum	Maximum
Length xyz	14.2	10.55	0	54.55
Length xy	13.76	10.61	0	54.28
Height	2.35	2.32	0	8.21
Item	Source	Length xyz	Length xy	Height	ND.T	ND.Z	ND.M	Comment
1	25do p24h002.nd2	9.58	8.82	3.74	0	0	0
2	25do p24h002.nd2	6.55	6.55	0.05	0	0	0
3	25do p24h002.nd2	7.72	7.61	1.26	0	0	0
4	25do p24h002.nd2	5.6	5.6	0.09	0	0	0
5	25do p24h002.nd2	5.86	5.23	2.63	0	0	0
6	25do p24h002.nd2	3.04	2.74	1.3	0	0	0
7	25do p24h002.nd2	1.42	0.63	1.28	0	0	0
8	25do p24h002.nd2	30.57	30.57	0.14	0	0	0
9	25do p24h002.nd2	9.98	9.58	2.81	0	0	0
10	25do p24h002.nd2	20.34	20.25	1.85	0	0	0
11	25do p24h002.nd2	26.47	26.31	2.9	0	0	0
12	25do p24h002.nd2	12.04	12.04	0.06	0	0	0
13	25do p24h002.nd2	9.84	9.84	0.28	0	0	0
14	25do p24h002.nd2	17.59	17.08	4.21	0	0	0
15	25do p24h002.nd2	14.4	13.33	5.47	0	0	0
16	25do p24h002.nd2	16.54	16.54	0.27	0	0	0
17	25do p24h002.nd2	10.75	10.43	2.59	0	0	0
18	25do p24h002.nd2	13.81	13.81	0.09	0	0	0
19	25do p24h002.nd2	0	0	0	0	0	0
20	25do p24h002.nd2	6.07	6.07	0.05	0	0	0
21	25do p24h002.nd2	10.64	10.31	2.65	0	0	0
22	25do p24h002.nd2	21.16	18.88	9.56	0	0	0
23	25do p24h002.nd2	26.01	25.88	2.56	0	0	0
24	25do p24h002.nd2	19.84	19.8	1.23	0	0	0
25	25do p24h002.nd2	16.04	15.57	3.85	0	0	0
26	25do p24h002.nd2	1.37	0.23	1.36	0	0	0
27	25do p24h002.nd2	0	0	0	0	0	0
28	25do p24h002.nd2	47.34	47.32	1.38	0	0	0
29	25do p24h002.nd2	30	29.5	5.45	0	0	0
30	25do p24h002.nd2	14.21	13.64	4	0	0	0
31	25do p24h002.nd2	12.33	7.83	9.52	0	0	0
32	25do p24h002.nd2	12.59	12.51	1.38	0	0	0
33	25do p24h002.nd2	12.16	10.89	5.41	0	0	0
34	25do p24h002.nd2	11.58	11.24	2.78	0	0	0
35	25do p24h002.nd2	0	0	0	0	0	0
36	25do p24h002.nd2	8.62	8.62	0.08	0	0	0
37	25do p24h002.nd2	14.48	14.24	2.64	0	0	0
38	25do p24h002.nd2	10.61	9.14	5.39	0	0	0
39	25do p24h002.nd2	0	0	0	0	0	0
40	25do p24h002.nd2	9.01	8.59	2.73	0	0	0
41	25do p24h002.nd2	9.43	9.33	1.37	0	0	0
42	25do p24h002.nd2	18.1	18.05	1.3	0	0	0
43	25do p24h002.nd2	12.34	9.42	7.98	0	0	0
44	25do p24h002.nd2	15.25	13.01	7.95	0	0	0
45	25do p24h002.nd2	9.29	7.58	5.36	0	0	0
46	25do p24h002.nd2	1.16	0.46	1.06	0	0	0
47	25do p24h002.nd2	14.78	13.38	6.29	0	0	0
48	25do p24h002.nd2	5.3	5.3	0	0	0	0
49	25do p24h002.nd2	11.42	11.35	1.24	0	0	0
50	25do p24h002.nd2	8.07	2.92	7.53	0	0	0
51	25do p24h002.nd2	3.07	3.07	0.03	0	0	0
52	25do p24h002.nd2	3.41	3.15	1.31	0	0	0
53	25do p24h002.nd2	8.63	8.52	1.32	0	0	0
54	25do p24h002.nd2	0	0	0	0	0	0
55	25do p24h002.nd2	19.71	19.71	0.03	0	0	0
56	25do p24h002.nd2	15.95	15.95	0	0	0	0
57	25do p24h002.nd2	12.49	12.48	0.04	0	0	0
58	25do p24h002.nd2	6.36	6.36	0	0	0	0
59	25do p24h002.nd2	7.81	3.81	6.82	0	0	0
60	25do p24h002.nd2	6.07	5.43	2.71	0	0	0
61	25do p24h002.nd2	17.15	16.93	2.76	0	0	0
62	25do p24h002.nd2	7.86	7.86	0	0	0	0
63	25do p24h002.nd2	21.52	21.48	1.37	0	0	0
64	25do p24h002.nd2	4.12	4.12	0.02	0	0	0
65	25do p24h002.nd2	1.53	0.73	1.34	0	0	0
66	25do p24h002.nd2	28.47	28.34	2.7	0	0	0
67	25do p24h002.nd2	49.77	49.7	2.7	0	0	0
68	25do p24h002.nd2	19	18.56	4.06	0	0	0
69	25do p24h002.nd2	8.6	8.5	1.35	0	0	0
70	25do p24h002.nd2	4.43	4.43	0	0	0	0
71	25do p24h002.nd2	7.3	6.03	4.11	0	0	0
72	25do p24h002.nd2	13.08	12.87	2.31	0	0	0
73	25do p24h002.nd2	9.01	9.01	0	0	0	0
74	25do p24h002.nd2	1.34	0.32	1.31	0	0	0
75	25do p24h002.nd2	13.38	13.38	0.04	0	0	0
76	25do p24h002.nd2	21.91	21.88	1.24	0	0	0
77	25do p24h002.nd2	2.76	1.32	2.42	0	0	0
78	25do p24h002.nd2	8.95	2.41	8.62	0	0	0
79	25do p24h002.nd2	10.58	10.27	2.56	0	0	0
80	25do p24h002.nd2	16.25	14.84	6.61	0	0	0
81	25do p24h002.nd2	13.28	13.28	0	0	0	0
82	25do p24h002.nd2	0	0	0	0	0	0
83	25do p24h002.nd2	0.11	0.11	0	0	0	0
84	25do p24h002.nd2	10.3	9.96	2.65	0	0	0
85	25do p24h002.nd2	17.64	16.4	6.51	0	0	0
86	25do p24h002.nd2	7.47	7.06	2.45	0	0	0
87	25do p24h002.nd2	17.56	17.56	0	0	0	0
88	25do p24h002.nd2	3.26	1.91	2.64	0	0	0
89	25do p24h002.nd2	0	0	0	0	0	0
90	25do p24h002.nd2	0	0	0	0	0	0
91	25do p24h002.nd2	11.11	10.76	2.79	0	0	0
92	25do p24h002.nd2	26.88	26.36	5.25	0	0	0
93	25do p24h002.nd2	25.6	25.3	3.94	0	0	0
94	25do p24h002.nd2	26.35	26.22	2.59	0	0	0
95	25do p24h002.nd2	0	0	0	0	0	0
96	25do p24h002.nd2	23.64	23.64	0.04	0	0	0
97	25do p24h002.nd2	21.3	21.3	0.05	0	0	0
98	25do p24h002.nd2	14.86	14.83	0.97	0	0	0
99	25do p24h002.nd2	11.7	11.56	1.78	0	0	0
100	25do p24h002.nd2	12.85	12.03	4.51	0	0	0
101	25do p24h002.nd2	9.02	8.21	3.75	0	0	0
102	25do p24h002.nd2	9.99	9.99	0	0	0	0
103	25do p24h002.nd2	7.4	7.31	1.18	0	0	0
104	25do p24h002.nd2	1.45	1.45	0.01	0	0	0
105	25do p24h002.nd2	0	0	0	0	0	0
106	25do p24h002.nd2	25.4	25.15	3.54	0	0	0
107	25do p24h002.nd2	28.29	28.19	2.37	0	0	0
108	25do p24h002.nd2	0.11	0.11	0	0	0	0
109	25do p24h002.nd2	17.14	16.13	5.79	0	0	0
110	25do p24h002.nd2	14.21	14.21	0	0	0	0
111	25do p24h002.nd2	0	0	0	0	0	0
112	25do p24h002.nd2	7.36	7.36	0	0	0	0
113	25do p24h002.nd2	7.58	7.58	0	0	0	0
114	25do p24h002.nd2	0	0	0	0	0	0
115	25do p24h002.nd2	0	0	0	0	0	0
116	25do p24h002.nd2	0	0	0	0	0	0
117	25do p24h002.nd2	2.23	2.23	0.01	0	0	0
118	25do p24h002.nd2	9.31	8.95	2.58	0	0	0
119	25do p24h002.nd2	1.7	1.08	1.31	0	0	0
120	25do p24h002.nd2	5.63	5.46	1.36	0	0	0
121	25do p24h002.nd2	6.65	6.07	2.73	0	0	0
Feature	Mean	St.Dev	Minimum	Maximum
Length xyz	11.23	9.26	0	49.77
Length xy	10.72	9.33	0	49.7
Height	2.08	2.34	0	9.56

## Sheet:  gogoRNAi U-Fmi
Item	Source	Length xyz	Length xy	Height	ND.T	ND.Z	ND.M	Comment
1	p24h.nd2	12.8299	12.8083	0.7426	0	0	0
2	p24h.nd2	19.798	19.7842	0.7392	0	0	0
3	p24h.nd2	22.3538	22.3538	0.0252	0	0	0
4	p24h.nd2	19.6764	19.495	2.6656	0	0	0
5	p24h.nd2	18.8012	18.7003	1.9451	0	0	0					length	sample1	sample2	sample3	sample4	total
6	p24h.nd2	13.592	12.9747	4.0495	0	0	0					5	1	0	2	3	6
7	p24h.nd2	43.2922	43.2769	1.1488	0	0	0					15	14	13	15	32	74
8	p24h.nd2	18.5574	18.5574	0.0258	0	0	0					30	59	47	58	57	221
9	p24h.nd2	17.8153	17.815	0.0984	0	0	0					30~	67	73	77	30	247
10	p24h.nd2	16.7331	16.7144	0.7906	0	0	0
11	p24h.nd2	77.113	77.0675	2.6498	0	0	0
12	p24h.nd2	59.7436	59.7432	0.2211	0	0	0				total length	16499.4
13	p24h.nd2	14.1593	14.0218	1.9682	0	0	0				total axon number	548
14	p24h.nd2	13.0104	12.3188	4.1852	0	0	0				Average length	30.1083826642336
15	p24h.nd2	19.5244	19.5236	0.1796	0	0	0
16	p24h.nd2	23.7484	23.6975	1.5537	0	0	0
17	p24h.nd2	13.7915	13.7909	0.1325	0	0	0
18	p24h.nd2	50.5223	50.5165	0.7694	0	0	0
19	p24h.nd2	14.2802	13.8537	3.4641	0	0	0
20	p24h.nd2	27.0224	26.9491	1.9892	0	0	0
21	p24h.nd2	12.609	12.5832	0.8051	0	0	0
22	p24h.nd2	40.5341	40.467	2.3298	0	0	0
23	p24h.nd2	27.016	27.0082	0.649	0	0	0
24	p24h.nd2	22.1612	21.7812	4.0862	0	0	0
25	p24h.nd2	25.2291	24.8968	4.0812	0	0	0
26	p24h.nd2	25.0048	25.004	0.2023	0	0	0
27	p24h.nd2	27.7245	27.5963	2.6634	0	0	0
28	p24h.nd2	20.0754	19.9529	2.2146	0	0	0
29	p24h.nd2	24.9732	24.7414	3.3947	0	0	0
30	p24h.nd2	83.435	83.4341	0.3873	0	0	0
31	p24h.nd2	66.8863	66.8863	0	0	0	0
32	p24h.nd2	64.8523	64.7381	3.8478	0	0	0
33	p24h.nd2	38.8935	36.629	13.0774	0	0	0
34	p24h.nd2	25.1371	24.9104	3.368	0	0	0
35	p24h.nd2	26.1538	25.61	5.3058	0	0	0
36	p24h.nd2	24.8425	23.9903	6.4508	0	0	0
37	p24h.nd2	28.1245	26.8217	8.4608	0	0	0
38	p24h.nd2	30.3592	30.254	2.5251	0	0	0
39	p24h.nd2	23.4035	23.4034	0.0592	0	0	0
40	p24h.nd2	35.6221	35.0892	6.1386	0	0	0
41	p24h.nd2	40.8771	39.0907	11.952	0	0	0
42	p24h.nd2	25.7232	25.7131	0.7223	0	0	0
43	p24h.nd2	28.6619	28.6253	1.4492	0	0	0
44	p24h.nd2	8.7292	8.7292	0.0001	0	0	0
45	p24h.nd2	7.8587	7.7243	1.4473	0	0	0
46	p24h.nd2	14.7823	14.7101	1.4585	0	0	0
47	p24h.nd2	19.3758	19.3209	1.4572	0	0	0
48	p24h.nd2	18.5076	18.4501	1.4566	0	0	0
49	p24h.nd2	47.4092	47.3882	1.4116	0	0	0
50	p24h.nd2	44.0425	44.0369	0.7065	0	0	0
51	p24h.nd2	37.7284	37.7284	0.0096	0	0	0
52	p24h.nd2	36.0906	36.0628	1.4146	0	0	0
53	p24h.nd2	36.8786	36.8719	0.7038	0	0	0
54	p24h.nd2	38.7378	38.7378	0	0	0	0
55	p24h.nd2	35.0152	34.9885	1.3689	0	0	0
56	p24h.nd2	28.6247	28.6247	1e-05	0	0	0
57	p24h.nd2	25.492	25.4544	1.3826	0	0	0
58	p24h.nd2	82.4094	82.4011	1.169	0	0	0
59	p24h.nd2	31.3099	31.3016	0.7235	0	0	0
60	p24h.nd2	34.5072	34.5072	0	0	0	0
61	p24h.nd2	31.5432	31.5432	0.0051	0	0	0
62	p24h.nd2	33.1468	33.1148	1.4568	0	0	0
63	p24h.nd2	39.0109	39.0109	0	0	0	0
64	p24h.nd2	38.8425	38.8425	0	0	0	0
65	p24h.nd2	18.586	18.586	0	0	0	0
66	p24h.nd2	31.6669	31.4623	3.5945	0	0	0
67	p24h.nd2	32.2148	32.1826	1.4402	0	0	0
68	p24h.nd2	30.1128	29.8937	3.6259	0	0	0
69	p24h.nd2	32.2524	32.1208	2.9109	0	0	0
70	p24h.nd2	13.3118	13.3118	0	0	0	0
71	p24h.nd2	22.4125	22.3644	1.4663	0	0	0
72	p24h.nd2	23.3899	23.3899	0.0127	0	0	0
73	p24h.nd2	55.5011	55.3882	3.5371	0	0	0
74	p24h.nd2	43.758	43.6604	2.9217	0	0	0
75	p24h.nd2	25.7585	25.7477	0.7469	0	0	0
76	p24h.nd2	20.4232	20.4232	0.0138	0	0	0
77	p24h.nd2	29.1612	29.1612	0.0282	0	0	0
78	p24h.nd2	45.0421	45.0421	0.0154	0	0	0
79	p24h.nd2	40.775	40.62	3.5515	0	0	0
80	p24h.nd2	37.3161	37.3161	0.0451	0	0	0
81	p24h.nd2	29.692	29.4754	3.5804	0	0	0
82	p24h.nd2	30.0697	30.0363	1.4179	0	0	0
83	p24h.nd2	19.6786	19.6786	0.0054	0	0	0
84	p24h.nd2	28.4725	28.3916	2.1445	0	0	0
85	p24h.nd2	25.4552	25.446	0.6867	0	0	0
86	p24h.nd2	21.5123	21.5006	0.7065	0	0	0
87	p24h.nd2	28.6978	28.6165	2.1585	0	0	0
88	p24h.nd2	23.8971	23.856	1.4004	0	0	0
89	p24h.nd2	29.7329	29.7245	0.7062	0	0	0
90	p24h.nd2	27.9141	27.6923	3.5124	0	0	0
91	p24h.nd2	35.6939	35.6601	1.5539	0	0	0
92	p24h.nd2	47.4077	47.0521	5.7953	0	0	0
93	p24h.nd2	60.1592	60.1425	1.4171	0	0	0
94	p24h.nd2	45.3591	45.1505	4.3451	0	0	0
95	p24h.nd2	29.4478	29.4118	1.457	0	0	0
96	p24h.nd2	29.604	29.5706	1.4065	0	0	0
97	p24h.nd2	39.183	39.0773	2.8763	0	0	0
98	p24h.nd2	22.4029	22.4029	0.0204	0	0	0
99	p24h.nd2	23.1965	23.0947	2.1707	0	0	0
100	p24h.nd2	13.4842	13.4682	0.6565	0	0	0
101	p24h.nd2	2.0094	2.0093	0.0159	0	0	0
102	p24h.nd2	37.4627	37.4626	0.0875	0	0	0
103	p24h.nd2	45.5077	45.3644	3.6078	0	0	0
104	p24h.nd2	42.3135	42.3134	0.0718	0	0	0
105	p24h.nd2	37.5927	37.362	4.1581	0	0	0
106	p24h.nd2	36.7733	36.7733	0.0406	0	0	0
107	p24h.nd2	24.7989	24.5391	3.58	0	0	0
108	p24h.nd2	29.6481	29.5125	2.8327	0	0	0
109	p24h.nd2	29.8033	29.3892	4.951	0	0	0
110	p24h.nd2	31.2257	31.1885	1.5249	0	0	0
111	p24h.nd2	31.0465	31.0432	0.4493	0	0	0
112	p24h.nd2	30.441	30.2297	3.5806	0	0	0
113	p24h.nd2	37.8223	37.7866	1.6439	0	0	0
114	p24h.nd2	33.5629	33.5471	1.0326	0	0	0
115	p24h.nd2	24.6013	24.4289	2.907	0	0	0
116	p24h.nd2	36.5411	36.5161	1.3497	0	0	0
117	p24h.nd2	29.5036	28.9889	5.4867	0	0	0
118	p24h.nd2	32.1154	32.0432	2.1528	0	0	0
119	p24h.nd2	35.3319	35.2154	2.8673	0	0	0
120	p24h.nd2	53.1799	53.1799	0.0057	0	0	0
121	p24h.nd2	31.2948	31.0797	3.6634	0	0	0
122	p24h.nd2	25.4577	25.4148	1.4771	0	0	0
123	p24h.nd2	24.7373	24.737	0.1181	0	0	0
124	p24h.nd2	20.3039	19.9934	3.5375	0	0	0
125	p24h.nd2	34.9913	34.8015	3.64	0	0	0
126	p24h.nd2	67.8361	67.8361	0.0313	0	0	0
127	p24h.nd2	39.2658	39.24	1.4243	0	0	0
128	p24h.nd2	31.0342	31.0261	0.7109	0	0	0
129	p24h.nd2	27.2377	26.9973	3.6111	0	0	0
130	p24h.nd2	11.8224	11.7438	1.3609	0	0	0
131	p24h.nd2	23.8576	23.5854	3.5939	0	0	0
132	p24h.nd2	39.394	39.3882	0.6773	0	0	0
133	p24h.nd2	46.0798	45.9648	3.2534	0	0	0
134	p24h.nd2	44.2949	44.2348	2.3074	0	0	0
135	p24h.nd2	39.5838	39.3924	3.8883	0	0	0
136	p24h.nd2	46.0162	46.0161	0.1195	0	0	0
137	p24h.nd2	33.2623	33.2622	0.0884	0	0	0
138	p24h.nd2	19.3111	19.0144	3.3717	0	0	0
139	p24h.nd2	34.1732	34.1378	1.5549	0	0	0
140	p24h.nd2	12.2258	11.5265	4.0754	0	0	0
141	p24h.nd2	16.5415	16.4819	1.4031	0	0	0
Feature	Mean	St.Dev	Minimum	Maximum
Length xyz	31.3294	13.9384	2.0094	83.435
Length xy	31.1888	13.9583	2.0093	83.4341
Height	1.9707	2.0867	0	13.0774
Item	Source	Length xyz	Length xy	Height	ND.T	ND.Z	ND.M	Comment
1	p24h.nd2	32.8545	32.6712	3.4656	0	0	0
2	p24h.nd2	35.6208	35.5116	2.7865	0	0	0
3	p24h.nd2	39.4208	39.4143	0.7188	0	0	0
4	p24h.nd2	34.3691	34.3691	0.0151	0	0	0
5	p24h.nd2	91.2163	91.2163	0	0	0	0
6	p24h.nd2	18.9444	18.9444	0	0	0	0
7	p24h.nd2	19.7266	19.7266	0.0337	0	0	0
8	p24h.nd2	18.4944	18.4382	1.4399	0	0	0
9	p24h.nd2	18.3802	18.0276	3.5827	0	0	0
10	p24h.nd2	17.7989	17.7989	0.0065	0	0	0
11	p24h.nd2	11.3613	10.7719	3.6117	0	0	0
12	p24h.nd2	13.6597	13.6597	0	0	0	0
13	p24h.nd2	29.2241	29.2241	2e-05	0	0	0
14	p24h.nd2	15.3625	15.3624	0.015	0	0	0
15	p24h.nd2	31.3763	31.3137	1.9806	0	0	0
16	p24h.nd2	39.2363	39.2356	0.2329	0	0	0
17	p24h.nd2	15.1691	15.1525	0.7101	0	0	0
18	p24h.nd2	45.4609	45.4446	1.218	0	0	0
19	p24h.nd2	27.2502	27.0199	3.5357	0	0	0
20	p24h.nd2	24.2448	24.0899	2.7358	0	0	0
21	p24h.nd2	25.2825	25.0503	3.4186	0	0	0
22	p24h.nd2	31.1306	31.0128	2.7051	0	0	0
23	p24h.nd2	30.8623	30.8615	0.2103	0	0	0
24	p24h.nd2	22.2806	22.2806	0	0	0	0
25	p24h.nd2	33.2786	33.2786	1e-05	0	0	0
26	p24h.nd2	59.3569	59.3536	0.6184	0	0	0
27	p24h.nd2	18.1302	17.9077	2.832	0	0	0
28	p24h.nd2	12.9306	12.8511	1.4316	0	0	0
29	p24h.nd2	12.9589	12.6305	2.899	0	0	0
30	p24h.nd2	15.7711	15.6239	2.1497	0	0	0
31	p24h.nd2	12.2312	12.2312	0.0082	0	0	0
32	p24h.nd2	43.726	43.7216	0.6253	0	0	0
33	p24h.nd2	13.0827	12.7712	2.8382	0	0	0
34	p24h.nd2	15.7627	15.747	0.7027	0	0	0
35	p24h.nd2	72.6547	72.606	2.6619	0	0	0
36	p24h.nd2	14.029	14.0125	0.6805	0	0	0
37	p24h.nd2	17.3503	17.2997	1.3242	0	0	0
38	p24h.nd2	16.2369	16.2215	0.7052	0	0	0
39	p24h.nd2	23.9597	23.95	0.6848	0	0	0
40	p24h.nd2	28.3572	28.3569	0.117	0	0	0
41	p24h.nd2	26.9977	26.9263	1.9619	0	0	0
42	p24h.nd2	47.2797	47.2796	0.0707	0	0	0
43	p24h.nd2	47.5912	47.5912	0.0104	0	0	0
44	p24h.nd2	41.7575	41.7522	0.6673	0	0	0
45	p24h.nd2	38.9964	38.9962	0.1286	0	0	0
46	p24h.nd2	48.1499	48.1465	0.5701	0	0	0
47	p24h.nd2	31.0759	30.9702	2.5606	0	0	0
48	p24h.nd2	41.9796	41.9543	1.456	0	0	0
49	p24h.nd2	65.094	65.0887	0.8311	0	0	0
50	p24h.nd2	25.8439	25.8439	0	0	0	0
51	p24h.nd2	21.0048	20.9633	1.3212	0	0	0
52	p24h.nd2	22.9388	22.557	4.1681	0	0	0
53	p24h.nd2	18.3455	18.1386	2.7474	0	0	0
54	p24h.nd2	27.1501	27.1389	0.7806	0	0	0
55	p24h.nd2	29.0176	28.7469	3.9543	0	0	0
56	p24h.nd2	24.3582	22.8562	8.4212	0	0	0
57	p24h.nd2	19.9085	19.1729	5.3616	0	0	0
58	p24h.nd2	25.1454	24.6053	5.1836	0	0	0
59	p24h.nd2	25.7674	25.5953	2.9726	0	0	0
60	p24h.nd2	50.9972	50.8916	3.2806	0	0	0
61	p24h.nd2	40.7902	40.6065	3.8674	0	0	0
62	p24h.nd2	13.4191	13.4191	0	0	0	0
63	p24h.nd2	35.0558	34.8831	3.4758	0	0	0
64	p24h.nd2	52.7256	52.6217	3.3082	0	0	0
65	p24h.nd2	48.4226	47.939	6.826	0	0	0
66	p24h.nd2	34.1551	34.148	0.6942	0	0	0
67	p24h.nd2	39.7033	39.6973	0.6915	0	0	0
68	p24h.nd2	42.042	42.042	0	0	0	0
69	p24h.nd2	43.0993	42.9158	3.9724	0	0	0
70	p24h.nd2	48.4898	47.9877	6.96	0	0	0
71	p24h.nd2	44.3175	43.509	8.4266	0	0	0
72	p24h.nd2	34.4103	33.9862	5.3858	0	0	0
73	p24h.nd2	39.4584	39.3255	3.236	0	0	0
74	p24h.nd2	24.4248	24.2482	2.9322	0	0	0
75	p24h.nd2	13.7979	13.5537	2.5847	0	0	0
76	p24h.nd2	16.7498	16.2682	3.9876	0	0	0
77	p24h.nd2	44.0244	43.9371	2.7716	0	0	0
78	p24h.nd2	18.5187	18.5186	0.0536	0	0	0
79	p24h.nd2	18.9664	18.0832	5.7202	0	0	0
80	p24h.nd2	22.7603	22.7126	1.4727	0	0	0
81	p24h.nd2	42.1866	42.1647	1.359	0	0	0
82	p24h.nd2	71.9481	71.61	6.9665	0	0	0
83	p24h.nd2	19.9938	18.0931	8.5084	0	0	0
84	p24h.nd2	23.1373	22.7543	4.1925	0	0	0
85	p24h.nd2	38.6006	38.5995	0.2831	0	0	0
86	p24h.nd2	72.1599	71.8186	7.01	0	0	0
87	p24h.nd2	19.5004	19.295	2.8228	0	0	0
88	p24h.nd2	13.9057	11.8475	7.2804	0	0	0
89	p24h.nd2	34.7037	34.6851	1.1365	0	0	0
90	p24h.nd2	55.8565	55.1767	8.6876	0	0	0
91	p24h.nd2	39.8206	39.2044	6.978	0	0	0
92	p24h.nd2	32.9276	31.8271	8.4416	0	0	0
93	p24h.nd2	28.0599	28.0598	0.0787	0	0	0
94	p24h.nd2	30.3048	30.2831	1.1489	0	0	0
95	p24h.nd2	20.6468	20.6447	0.2939	0	0	0
96	p24h.nd2	47.9686	47.9562	1.0906	0	0	0
97	p24h.nd2	39.6614	38.9722	7.3616	0	0	0
98	p24h.nd2	36.0815	36.0793	0.4023	0	0	0
99	p24h.nd2	47.5403	46.5348	9.7261	0	0	0
100	p24h.nd2	51.3937	50.464	9.7314	0	0	0
101	p24h.nd2	38.0244	37.8221	3.9163	0	0	0
102	p24h.nd2	35.9785	35.9785	0	0	0	0
103	p24h.nd2	52.3627	52.1599	4.6037	0	0	0
104	p24h.nd2	41.6992	41.6594	1.8217	0	0	0
105	p24h.nd2	33.001	32.9729	1.3607	0	0	0
106	p24h.nd2	38.5123	38.4323	2.4806	0	0	0
107	p24h.nd2	42.8082	42.7886	1.2939	0	0	0
108	p24h.nd2	40.2035	40.2035	0	0	0	0
109	p24h.nd2	37.4984	37.4984	0	0	0	0
110	p24h.nd2	41.8076	41.7131	2.8105	0	0	0
111	p24h.nd2	26.4085	26.2854	2.5463	0	0	0
112	p24h.nd2	79.2719	79.2713	0.2983	0	0	0
113	p24h.nd2	14.125	13.8466	2.7903	0	0	0
114	p24h.nd2	42.5957	42.5782	1.2185	0	0	0
115	p24h.nd2	63.4973	63.4825	1.3693	0	0	0
116	p24h.nd2	17.3632	17.1724	2.567	0	0	0
117	p24h.nd2	15.1053	15.0352	1.4533	0	0	0
118	p24h.nd2	17.3091	17.1162	2.5773	0	0	0
119	p24h.nd2	20.7418	20.5844	2.5498	0	0	0
120	p24h.nd2	15.7917	15.7351	1.3367	0	0	0
121	p24h.nd2	33.7794	33.7789	0.1948	0	0	0
122	p24h.nd2	33.2349	33.2095	1.3002	0	0	0
123	p24h.nd2	49.1104	49.0364	2.6958	0	0	0
124	p24h.nd2	63.9663	63.9509	1.4049	0	0	0
125	p24h.nd2	12.9446	12.6972	2.5187	0	0	0
126	p24h.nd2	42.8198	42.8067	1.0564	0	0	0
127	p24h.nd2	41.4013	41.3381	2.2854	0	0	0
128	p24h.nd2	30.3445	30.2542	2.3385	0	0	0
129	p24h.nd2	32.5382	32.5171	1.1706	0	0	0
130	p24h.nd2	14.8278	14.8277	0.0395	0	0	0
131	p24h.nd2	27.9757	27.9415	1.3837	0	0	0
132	p24h.nd2	40.4703	40.4507	1.2605	0	0	0
133	p24h.nd2	30.6142	30.5879	1.2667	0	0	0
Feature	Mean	St.Dev	Minimum	Maximum
Length xyz	32.991	15.47	11.3613	91.2163
Length xy	32.8014	15.5085	10.7719	91.2163
Height	2.3679	2.3829	0	9.7314
Item	Source	Length xyz	Length xy	Height	ND.T	ND.Z	ND.M	Comment
1	p24h.nd2	24.8925	24.8925	0	0	0	0
2	p24h.nd2	31.6318	31.3672	4.0832	0	0	0
3	p24h.nd2	24.9462	24.9462	0	0	0	0
4	p24h.nd2	3.5634	3.5633	0.0187	0	0	0
5	p24h.nd2	78.1747	78.1744	0.2157	0	0	0
6	p24h.nd2	69.0869	69.0253	2.9179	0	0	0
7	p24h.nd2	44.3165	44.3159	0.2429	0	0	0
8	p24h.nd2	57.7152	57.5489	4.3784	0	0	0
9	p24h.nd2	49.3203	49.3176	0.5173	0	0	0
10	p24h.nd2	29.3515	29.0552	4.1603	0	0	0
11	p24h.nd2	46.912	46.7126	4.3211	0	0	0
12	p24h.nd2	27.3042	27.275	1.2623	0	0	0
13	p24h.nd2	33.674	33.5678	2.6715	0	0	0
14	p24h.nd2	16.1563	15.5929	4.2295	0	0	0
15	p24h.nd2	17.672	17.6067	1.5177	0	0	0
16	p24h.nd2	26.4341	26.1382	3.9441	0	0	0
17	p24h.nd2	14.4408	13.8257	4.1695	0	0	0
18	p24h.nd2	22.2758	22.2755	0.1168	0	0	0
19	p24h.nd2	18.3181	18.3181	0	0	0	0
20	p24h.nd2	52.9723	52.9095	2.5793	0	0	0
21	p24h.nd2	20.2442	20.0733	2.6249	0	0	0
22	p24h.nd2	15.4296	15.4296	0.0183	0	0	0
23	p24h.nd2	34.3791	34.354	1.3119	0	0	0
24	p24h.nd2	47.3846	47.2428	3.662	0	0	0
25	p24h.nd2	27.3798	27.0641	4.146	0	0	0
26	p24h.nd2	60.5111	60.4241	3.2428	0	0	0
27	p24h.nd2	60.2829	60.2829	0	0	0	0
28	p24h.nd2	60.7079	60.6115	3.4199	0	0	0
29	p24h.nd2	82.9616	82.9397	1.9086	0	0	0
30	p24h.nd2	21.827	21.0681	5.7052	0	0	0
31	p24h.nd2	8.1577	7.6174	2.9195	0	0	0
32	p24h.nd2	53.2773	53.0155	5.275	0	0	0
33	p24h.nd2	43.7984	43.7054	2.8515	0	0	0
34	p24h.nd2	56.1058	56.0951	1.0955	0	0	0
35	p24h.nd2	29.9985	29.8703	2.7701	0	0	0
36	p24h.nd2	48.104	48.104	0	0	0	0
37	p24h.nd2	49.7736	49.7376	1.8927	0	0	0
38	p24h.nd2	15.0436	15.0436	0	0	0	0
39	p24h.nd2	17.9123	17.9123	0	0	0	0
40	p24h.nd2	21.9043	21.7276	2.776	0	0	0
41	p24h.nd2	33.1114	33.1114	0	0	0	0
42	p24h.nd2	12.5624	12.2435	2.8125	0	0	0
43	p24h.nd2	44.7126	44.3989	5.2865	0	0	0
44	p24h.nd2	11.3185	11.2334	1.385	0	0	0
45	p24h.nd2	32.3454	31.6325	6.7531	0	0	0
46	p24h.nd2	25.9979	25.9979	0	0	0	0
47	p24h.nd2	28.7282	28.7282	0	0	0	0
48	p24h.nd2	24.1438	23.2043	6.6697	0	0	0
49	p24h.nd2	51.4081	51.385	1.5406	0	0	0
50	p24h.nd2	60.5987	60.5473	2.4954	0	0	0
51	p24h.nd2	27.526	26.7957	6.2986	0	0	0
52	p24h.nd2	31.8483	31.8294	1.0968	0	0	0
53	p24h.nd2	37.1324	36.742	5.3703	0	0	0
54	p24h.nd2	31.6413	31.5714	2.1009	0	0	0
55	p24h.nd2	71.103	71.0999	0.6653	0	0	0
56	p24h.nd2	62.7277	62.7272	0.2458	0	0	0
57	p24h.nd2	27.1845	26.7643	4.7615	0	0	0
58	p24h.nd2	32.1683	31.9624	3.6334	0	0	0
59	p24h.nd2	41.2538	40.7758	6.2618	0	0	0
60	p24h.nd2	19.5021	19.4605	1.2728	0	0	0
61	p24h.nd2	32.9606	32.9356	1.2832	0	0	0
62	p24h.nd2	18.296	18.2389	1.4446	0	0	0
63	p24h.nd2	17.6091	17.5615	1.2937	0	0	0
64	p24h.nd2	51.734	51.7034	1.7778	0	0	0
65	p24h.nd2	38.0215	37.9215	2.7566	0	0	0
66	p24h.nd2	36.3094	35.9725	4.9342	0	0	0
67	p24h.nd2	24.2078	23.8864	3.9319	0	0	0
68	p24h.nd2	39.1079	39.1075	0.1821	0	0	0
69	p24h.nd2	35.1864	35.114	2.256	0	0	0
70	p24h.nd2	26.1594	26.1594	0.0425	0	0	0
71	p24h.nd2	48.0137	47.5134	6.913	0	0	0
72	p24h.nd2	54.2868	54.2699	1.3546	0	0	0
73	p24h.nd2	25.1651	25.1651	0	0	0	0
74	p24h.nd2	34.544	34.544	0	0	0	0
75	p24h.nd2	34.3653	34.09	4.3412	0	0	0
76	p24h.nd2	22.4708	22.4702	0.1615	0	0	0
77	p24h.nd2	25.6497	25.6491	0.1789	0	0	0
78	p24h.nd2	44.0667	44.0334	1.714	0	0	0
79	p24h.nd2	36.6415	36.6415	0.0028	0	0	0
80	p24h.nd2	18.2712	18.0466	2.8564	0	0	0
81	p24h.nd2	43.4448	43.3376	3.0496	0	0	0
82	p24h.nd2	35.7832	35.7431	1.6928	0	0	0
83	p24h.nd2	22.1442	21.708	4.3739	0	0	0
84	p24h.nd2	19.1394	19.1394	0	0	0	0
85	p24h.nd2	25.4664	25.4662	0.1163	0	0	0
86	p24h.nd2	10.8153	10.4343	2.8454	0	0	0
87	p24h.nd2	39.3859	39.3497	1.6877	0	0	0
88	p24h.nd2	39.9018	39.8267	2.4463	0	0	0
89	p24h.nd2	24.6592	24.3222	4.0631	0	0	0
90	p24h.nd2	41.1769	41.1442	1.6403	0	0	0
91	p24h.nd2	47.6992	47.6348	2.4778	0	0	0
92	p24h.nd2	10.4944	10.4944	0	0	0	0
93	p24h.nd2	15.9192	15.3781	4.1149	0	0	0
94	p24h.nd2	15.656	15.1291	4.0274	0	0	0
95	p24h.nd2	40.4514	40.377	2.4521	0	0	0
96	p24h.nd2	50.7647	50.6324	3.6622	0	0	0
97	p24h.nd2	15.0339	14.8051	2.6131	0	0	0
98	p24h.nd2	24.1509	24.1168	1.2829	0	0	0
99	p24h.nd2	38.9437	38.9187	1.3945	0	0	0
100	p24h.nd2	10.762	10.0535	3.8403	0	0	0
101	p24h.nd2	35.5038	35.5038	0	0	0	0
102	p24h.nd2	23.6922	23.6922	0.0187	0	0	0
103	p24h.nd2	14.09	14.09	0	0	0	0
104	p24h.nd2	16.4775	16.4766	0.1745	0	0	0
105	p24h.nd2	33.6249	33.5864	1.6096	0	0	0
106	p24h.nd2	21.3785	21.2014	2.7465	0	0	0
107	p24h.nd2	12.9656	12.9648	0.1429	0	0	0
108	p24h.nd2	22.7163	22.6663	1.5054	0	0	0
109	p24h.nd2	24.4822	24.1217	4.1862	0	0	0
110	p24h.nd2	28.1688	28.1575	0.7976	0	0	0
111	p24h.nd2	15.3158	14.8154	3.883	0	0	0
112	p24h.nd2	5.4073	5.4073	0	0	0	0
113	p24h.nd2	0.9985	0.9985	0	0	0	0
114	p24h.nd2	30.7376	30.7064	1.3848	0	0	0
115	p24h.nd2	53.228	53.1753	2.3665	0	0	0
116	p24h.nd2	40.0621	40.0363	1.4385	0	0	0
117	p24h.nd2	56.1451	56.0198	3.7488	0	0	0
118	p24h.nd2	33.4782	33.4579	1.1678	0	0	0
119	p24h.nd2	46.8792	46.8535	1.5504	0	0	0
120	p24h.nd2	39.247	39.247	0.0212	0	0	0
121	p24h.nd2	37.6615	37.5679	2.6539	0	0	0
122	p24h.nd2	39.0788	39.0527	1.4257	0	0	0
123	p24h.nd2	37.9843	37.8786	2.8321	0	0	0
124	p24h.nd2	19.4992	19.0065	4.3556	0	0	0
125	p24h.nd2	19.5175	19.0227	4.3671	0	0	0
126	p24h.nd2	20.9704	20.7693	2.8977	0	0	0
127	p24h.nd2	44.1127	43.8909	4.4181	0	0	0
128	p24h.nd2	19.7787	19.7246	1.4623	0	0	0
129	p24h.nd2	29.473	29.4372	1.4521	0	0	0
130	p24h.nd2	21.6672	21.4707	2.911	0	0	0
131	p24h.nd2	29.9328	29.9328	0	0	0	0
132	p24h.nd2	35.9915	35.9723	1.1771	0	0	0
133	p24h.nd2	21.0491	20.3065	5.5416	0	0	0
134	p24h.nd2	20.9447	20.8999	1.3682	0	0	0
135	p24h.nd2	41.4145	41.3984	1.155	0	0	0
136	p24h.nd2	9.5312	9.5312	0	0	0	0
137	p24h.nd2	22.6607	21.8995	5.824	0	0	0
138	p24h.nd2	19.1466	19.1466	0.0161	0	0	0
139	p24h.nd2	11.2924	10.9091	2.9169	0	0	0
140	p24h.nd2	14.7282	13.5282	5.823	0	0	0
141	p24h.nd2	30.9097	30.8792	1.3727	0	0	0
142	p24h.nd2	49.161	48.8221	5.7627	0	0	0
143	p24h.nd2	39.1231	38.7009	5.7322	0	0	0
144	p24h.nd2	40.364	39.9558	5.7262	0	0	0
145	p24h.nd2	58.2259	58.2254	0.2449	0	0	0
146	p24h.nd2	33.9817	33.7373	4.0683	0	0	0
147	p24h.nd2	36.0212	35.9947	1.3818	0	0	0
148	p24h.nd2	49.8416	49.8416	0.0383	0	0	0
149	p24h.nd2	14.9639	14.9022	1.3579	0	0	0
150	p24h.nd2	44.1039	44.0828	1.3656	0	0	0
151	p24h.nd2	28.8678	28.8672	0.1755	0	0	0
152	p24h.nd2	14.625	14.353	2.8073	0	0	0
Feature	Mean	St.Dev	Minimum	Maximum
Length xyz	32.3516	15.5185	0.9985	82.9616
Length xy	32.19	15.5782	0.9985	82.9397
Height	2.2381	1.8872	0	6.913
Item	Source	Length xyz	Length xy	Height	ND.T	ND.Z	ND.M	Comment
1	p24h.nd2	21.1438	21.1029	1.3144	0	0	0
2	p24h.nd2	27.1265	26.8138	4.1069	0	0	0
3	p24h.nd2	13.3415	12.6759	4.1615	0	0	0
4	p24h.nd2	33.1115	33.0736	1.5839	0	0	0
5	p24h.nd2	37.3224	37.2341	2.5664	0	0	0
6	p24h.nd2	37.1095	37.0727	1.6517	0	0	0
7	p24h.nd2	29.9007	29.8997	0.2449	0	0	0
8	p24h.nd2	5.6037	5.6037	0	0	0	0
9	p24h.nd2	19.4424	19.2274	2.883	0	0	0
10	p24h.nd2	38.0826	37.8426	4.2688	0	0	0
11	p24h.nd2	48.1388	47.9771	3.9421	0	0	0
12	p24h.nd2	17.1706	16.2458	5.5591	0	0	0
13	p24h.nd2	13.333	13.2526	1.4622	0	0	0
14	p24h.nd2	34.4363	33.9744	5.6212	0	0	0
15	p24h.nd2	41.938	41.7501	3.9656	0	0	0
16	p24h.nd2	15.1314	15.0616	1.4516	0	0	0
17	p24h.nd2	24.5654	24.5255	1.3996	0	0	0
18	p24h.nd2	20.8946	20.71	2.7715	0	0	0
19	p24h.nd2	12.3648	11.0816	5.4851	0	0	0
20	p24h.nd2	22.5303	22.1549	4.0959	0	0	0
21	p24h.nd2	0	0	0	0	0	0
22	p24h.nd2	29.8277	29.5577	4.0045	0	0	0
23	p24h.nd2	38.9013	38.8866	1.068	0	0	0
24	p24h.nd2	27.6171	27.0731	5.4544	0	0	0
25	p24h.nd2	44.1816	43.8146	5.6831	0	0	0
26	p24h.nd2	58.7275	58.7149	1.2185	0	0	0
27	p24h.nd2	18.3403	18.291	1.3434	0	0	0
28	p24h.nd2	14.2624	14.2045	1.2832	0	0	0
29	p24h.nd2	19.6357	18.8141	5.6204	0	0	0
30	p24h.nd2	18.9609	18.9607	0.0916	0	0	0
31	p24h.nd2	20.5735	20.5735	0	0	0	0
32	p24h.nd2	9.2627	9.1556	1.405	0	0	0
33	p24h.nd2	29.1307	28.9724	3.0328	0	0	0
34	p24h.nd2	25.0148	24.8485	2.8801	0	0	0
35	p24h.nd2	38.1964	38.1555	1.7681	0	0	0
36	p24h.nd2	24.4428	23.9615	4.8266	0	0	0
37	p24h.nd2	30.9709	30.8494	2.7408	0	0	0
38	p24h.nd2	24.8284	24.3085	5.0539	0	0	0
39	p24h.nd2	30.4968	29.7441	6.7338	0	0	0
40	p24h.nd2	38.0571	37.8517	3.948	0	0	0
41	p24h.nd2	35.2246	34.569	6.7644	0	0	0
42	p24h.nd2	30.46	30.0113	5.209	0	0	0
43	p24h.nd2	33.187	32.7367	5.4485	0	0	0
44	p24h.nd2	9.8538	9.769	1.2897	0	0	0
45	p24h.nd2	19.9294	19.8816	1.3792	0	0	0
46	p24h.nd2	20.1373	19.6996	4.1755	0	0	0
47	p24h.nd2	16.6993	16.6372	1.4389	0	0	0
48	p24h.nd2	22.7999	22.7551	1.4286	0	0	0
49	p24h.nd2	35.8589	35.8587	0.1308	0	0	0
50	p24h.nd2	15.125	14.1007	5.4716	0	0	0
51	p24h.nd2	13.7661	12.0933	6.5771	0	0	0
52	p24h.nd2	16.0527	15.0537	5.5745	0	0	0
53	p24h.nd2	14.9066	14.8225	1.5812	0	0	0
54	p24h.nd2	6.9673	6.8822	1.0855	0	0	0
55	p24h.nd2	0.7928	0.4299	0.6662	0	0	0
56	p24h.nd2	48.6297	48.3955	4.7671	0	0	0
57	p24h.nd2	21.386	21.1962	2.8428	0	0	0
58	p24h.nd2	17.6084	16.1522	7.0117	0	0	0
59	p24h.nd2	11.9995	11.9115	1.4501	0	0	0
60	p24h.nd2	17.7571	17.5214	2.8833	0	0	0
61	p24h.nd2	13.8481	13.8481	0.0035	0	0	0
62	p24h.nd2	29.9756	29.9736	0.3464	0	0	0
63	p24h.nd2	23.3123	23.1916	2.3685	0	0	0
64	p24h.nd2	27.7435	26.3328	8.7342	0	0	0
65	p24h.nd2	15.6675	15.6675	0	0	0	0
66	p24h.nd2	18.3484	18.3484	0	0	0	0
67	p24h.nd2	18.8846	18.3851	4.3144	0	0	0
68	p24h.nd2	22.1999	22.1408	1.6191	0	0	0
69	p24h.nd2	17.0327	17.0326	0.0674	0	0	0
70	p24h.nd2	41.6744	41.0419	7.2331	0	0	0
71	p24h.nd2	48.8111	48.5538	5.0052	0	0	0
72	p24h.nd2	44.8499	44.842	0.8371	0	0	0
73	p24h.nd2	33.0295	32.5942	5.3442	0	0	0
74	p24h.nd2	28.5261	28.5259	0.1034	0	0	0
75	p24h.nd2	28.2037	28.0685	2.7582	0	0	0
76	p24h.nd2	26.2367	25.6867	5.3442	0	0	0
77	p24h.nd2	48.1095	48.0102	3.0895	0	0	0
78	p24h.nd2	31.5208	31.4959	1.2527	0	0	0
79	p24h.nd2	24.6778	24.1159	5.2362	0	0	0
80	p24h.nd2	25.9622	25.6909	3.7434	0	0	0
81	p24h.nd2	9.5882	9.5035	1.2718	0	0	0
82	p24h.nd2	9.8678	9.8643	0.2643	0	0	0
83	p24h.nd2	13.7531	13.7126	1.0548	0	0	0
84	p24h.nd2	13.629	12.4233	5.6045	0	0	0
85	p24h.nd2	13.0118	13.0117	0.057	0	0	0
86	p24h.nd2	14.4732	12.9906	6.3809	0	0	0
87	p24h.nd2	11.1297	11.1274	0.2298	0	0	0
88	p24h.nd2	29.1414	29.0684	2.0612	0	0	0
89	p24h.nd2	8.9597	8.9586	0.1444	0	0	0
90	p24h.nd2	19.9854	19.7803	2.8557	0	0	0
91	p24h.nd2	25.8912	25.8812	0.718	0	0	0
92	p24h.nd2	7.8668	7.5519	2.2036	0	0	0
93	p24h.nd2	24.0344	24.024	0.7055	0	0	0
94	p24h.nd2	9.7256	9.7227	0.2388	0	0	0
95	p24h.nd2	21.5005	21.4223	1.8324	0	0	0
96	p24h.nd2	13.7256	13.4087	2.9327	0	0	0
97	p24h.nd2	16.6523	16.3911	2.9382	0	0	0
98	p24h.nd2	15.5753	15.2964	2.934	0	0	0
99	p24h.nd2	22.4937	22.4457	1.4691	0	0	0
100	p24h.nd2	21.6211	21.4215	2.9311	0	0	0
101	p24h.nd2	20.8294	20.8293	0.0138	0	0	0
102	p24h.nd2	12.6168	12.6168	0.0165	0	0	0
103	p24h.nd2	18.1276	18.0679	1.4704	0	0	0
104	p24h.nd2	20.8309	20.8308	0.0169	0	0	0
105	p24h.nd2	15.774	15.7053	1.4706	0	0	0
106	p24h.nd2	10.2208	10.2208	0.0171	0	0	0
107	p24h.nd2	27.0788	27.0788	0.032	0	0	0
108	p24h.nd2	27.6602	27.6237	1.4193	0	0	0
109	p24h.nd2	11.1601	11.16	0.0519	0	0	0
110	p24h.nd2	30.5941	30.561	1.4211	0	0	0
111	p24h.nd2	32.5241	32.4021	2.8144	0	0	0
112	p24h.nd2	14.7916	14.7221	1.4317	0	0	0
113	p24h.nd2	27.6373	27.4889	2.8602	0	0	0
114	p24h.nd2	30.63	30.63	0.0133	0	0	0
115	p24h.nd2	6.2397	4.5089	4.3132	0	0	0
116	p24h.nd2	5.346	4.5081	2.8734	0	0	0
117	p24h.nd2	0	0	0	0	0	0
118	p24h.nd2	8.3856	8.3854	0.0437	0	0	0
119	p24h.nd2	13.0449	12.7137	2.9208	0	0	0
120	p24h.nd2	10.1916	10.1915	0.0589	0	0	0
121	p24h.nd2	34.6748	34.5581	2.8428	0	0	0
122	p24h.nd2	43.8424	43.8424	0.0036	0	0	0
Feature	Mean	St.Dev	Minimum	Maximum
Length xyz	22.7598	11.4696	0	58.7275
Length xy	22.4975	11.5179	0	58.7149
Height	2.5098	2.1123	0	8.7342

## Sheet: U-gogo U-Fmi
Item	Source	Length xyz	Length xy	Height	ND.T	ND.Z	ND.M	Comment
1	p24h.nd2	18.71	18.0718	4.8451	0	0	0	1
2	p24h.nd2	1.8563	1.1797	1.4332	0	0	0	1			length	sample1	sample2	sample3	sample4	sample5	total
3	p24h.nd2	0	0	0	0	0	0	1			5	69	80	66	89	67	371
4	p24h.nd2	0.7111	0.288	0.6502	0	0	0	1			15	15	32	21	19	10	97
5	p24h.nd2	0.7399	0.3528	0.6503	0	0	0	1			35	5	5	6	1	1	18
6	p24h.nd2	0.9144	0.9144	0.0006	0	0	0	1			35~	0	0	0	0	0	0
7	p24h.nd2	1.7104	1.5086	0.8061	0	0	0	1				#N/A
8	p24h.nd2	1.7487	1.5876	0.7331	0	0	0	3
9	p24h.nd2	1.0605	0.7493	0.7505	0	0	0	3
10	p24h.nd2	2.9033	2.7948	0.7864	0	0	0	3
11	p24h.nd2	2.7262	2.726	0.0284	0	0	0	3			total length	1664.1
12	p24h.nd2	2.3624	2.3622	0.027	0	0	0	3			total axon number	486
13	p24h.nd2	1.5536	1.5536	0	0	0	0	3			Average length	3.42407736625514
14	p24h.nd2	10.7862	7.1869	8.043	0	0	0	3
15	p24h.nd2	7.0513	4.3035	5.5857	0	0	0	3
16	p24h.nd2	2.1567	1.066	1.8749	0	0	0	3
17	p24h.nd2	0.5006	0.2509	0.4333	0	0	0	3
18	p24h.nd2	2.1343	1.7371	1.24	0	0	0	3
19	p24h.nd2	1.9024	1.9024	0.0018	0	0	0	3
20	p24h.nd2	2.7697	1.9297	1.9869	0	0	0	3
21	p24h.nd2	1.0648	1.0648	0.0059	0	0	0	3
22	p24h.nd2	1.77	1.7699	0.0178	0	0	0	3
23	p24h.nd2	0.4969	0.4969	0.0067	0	0	0	3
24	p24h.nd2	28.5883	28.4105	3.1835	0	0	0	3
25	p24h.nd2	24.9763	24.7686	3.2142	0	0	0	3
26	p24h.nd2	6.7244	6.68	0.7715	0	0	0	3
27	p24h.nd2	6.7232	6.3069	2.329	0	0	0	3
28	p24h.nd2	12.311	12.3042	0.4092	0	0	0	3
29	p24h.nd2	11.0793	10.9433	1.7308	0	0	0	3
30	p24h.nd2	10.408	10.4021	0.35	0	0	0	3
31	p24h.nd2	0.7594	0.3605	0.6684	0	0	0	3
32	p24h.nd2	0.8823	0.4124	0.78	0	0	0	3
33	p24h.nd2	0.2539	0.2539	0.0015	0	0	0	3
34	p24h.nd2	0	0	0	0	0	0	3
35	p24h.nd2	0.5506	0.5506	0	0	0	0	3
36	p24h.nd2	0.8608	0.8608	0	0	0	0	3
37	p24h.nd2	0.8256	0.4354	0.7015	0	0	0	3
38	p24h.nd2	1.1241	0.823	0.7657	0	0	0	3
39	p24h.nd2	1.6896	1.6896	0	0	0	0	3
40	p24h.nd2	1.5137	1.5137	0	0	0	0	3
41	p24h.nd2	1.1396	1.1396	0	0	0	0	3
42	p24h.nd2	0.8946	0.8946	0	0	0	0	3
43	p24h.nd2	0.9857	0.9857	0	0	0	0
44	p24h.nd2	1.7828	1.6178	0.749	0	0	0
45	p24h.nd2	7.6874	7.6806	0.3235	0	0	0
46	p24h.nd2	9.816	9.6086	2.0069	0	0	0
47	p24h.nd2	2.2383	2.2383	0.0015	0	0	0
48	p24h.nd2	0.5163	0.5163	0.0016	0	0	0
49	p24h.nd2	0.9595	0.5216	0.8053	0	0	0
50	p24h.nd2	1.7263	0.8484	1.5034	0	0	0
51	p24h.nd2	0	0	0	0	0	0
52	p24h.nd2	0	0	0	0	0	0
53	p24h.nd2	0	0	0	0	0	0
54	p24h.nd2	0	0	0	0	0	0
55	p24h.nd2	1.1755	0.343	1.1244	0	0	0
56	p24h.nd2	0.8277	0.3256	0.761	0	0	0
57	p24h.nd2	1.1626	0.2206	1.1415	0	0	0
58	p24h.nd2	1.7675	0.8817	1.5319	0	0	0
59	p24h.nd2	0.9937	0.093	0.9894	0	0	0
60	p24h.nd2	5.8029	4.9674	2.9997	0	0	0
61	p24h.nd2	3.1277	0.6782	3.0533	0	0	0
62	p24h.nd2	2.7954	1.5854	2.3023	0	0	0
63	p24h.nd2	0.8562	0.8562	0	0	0	0
64	p24h.nd2	9.0413	8.4521	3.2104	0	0	0
65	p24h.nd2	3.8642	3.782	0.7928	0	0	0
66	p24h.nd2	13.99	13.782	2.4037	0	0	0
67	p24h.nd2	10.2357	10.1243	1.5061	0	0	0
68	p24h.nd2	15.1604	13.1249	7.5879	0	0	0
69	p24h.nd2	12.9373	12.8934	1.0647	0	0	0
70	p24h.nd2	24.7947	22.569	10.2672	0	0	0
71	p24h.nd2	0.1333	0.1333	0.0007	0	0	0
72	p24h.nd2	0	0	0	0	0	0
73	p24h.nd2	0.5649	0.5649	0.0013	0	0	0
74	p24h.nd2	2.4292	1.2545	2.0802	0	0	0
75	p24h.nd2	0.5136	0.5136	0.0014	0	0	0
76	p24h.nd2	0.4025	0.4025	0.0028	0	0	0
77	p24h.nd2	0.4116	0.4114	0.0127	0	0	0
78	p24h.nd2	4.3074	4.0779	1.3871	0	0	0
79	p24h.nd2	1.32	1.1226	0.6943	0	0	0
80	p24h.nd2	8.8056	5.9726	6.4705	0	0	0
81	p24h.nd2	1.41	1.2694	0.6138	0	0	0
82	p24h.nd2	0.1199	0.1199	0.0013	0	0	0
83	p24h.nd2	0.0633	0.0633	0.0001	0	0	0
84	p24h.nd2	0	0	0	0	0	0
85	p24h.nd2	0	0	0	0	0	0
86	p24h.nd2	0	0	0	0	0	0
87	p24h.nd2	0.6694	0.1351	0.6556	0	0	0
88	p24h.nd2	0.1297	0.1296	0.0036	0	0	0
89	p24h.nd2	4.6122	4.3153	1.6282	0	0	0
Feature	Mean	St.Dev	Minimum	Maximum
Length xyz	3.8098	5.7841	0	28.5883
Length xy	3.4127	5.6032	0	28.4105
Height	1.1741	1.884	0	10.2672
Item	Source	Length xyz	Length xy	Height	ND.T	ND.Z	ND.M	Comment
1	p24h.nd2	14.5101	14.3063	2.4238	0	0	0
2	p24h.nd2	0	0	0	0	0	0
3	p24h.nd2	0	0	0	0	0	0
4	p24h.nd2	0	0	0	0	0	0
5	p24h.nd2	1.0387	1.0387	0.0011	0	0	0
6	p24h.nd2	0.7559	0.7559	0.0005	0	0	0
7	p24h.nd2	4.6177	4.5527	0.7718	0	0	0
8	p24h.nd2	0.7761	0.2363	0.7393	0	0	0
9	p24h.nd2	0	0	0	0	0	0
10	p24h.nd2	11.007	10.9847	0.7009	0	0	0
11	p24h.nd2	0.3543	0.3543	0.0017	0	0	0
12	p24h.nd2	0.0679	0.0679	0.0005	0	0	0
13	p24h.nd2	0	0	0	0	0	0
14	p24h.nd2	0	0	0	0	0	0
15	p24h.nd2	0	0	0	0	0	0
16	p24h.nd2	0.0667	0.0667	0.0001	0	0	0
17	p24h.nd2	0.3427	0.3427	0.0006	0	0	0
18	p24h.nd2	10.0299	9.894	1.6455	0	0	0
19	p24h.nd2	11.7928	11.3687	3.1342	0	0	0
20	p24h.nd2	11.3859	10.9519	3.1135	0	0	0
21	p24h.nd2	0	0	0	0	0	0
22	p24h.nd2	0.1542	0.1542	0.0003	0	0	0
23	p24h.nd2	0	0	0	0	0	0
24	p24h.nd2	0.7541	0.7535	0.0317	0	0	0
25	p24h.nd2	1.0136	0.7074	0.7259	0	0	0
26	p24h.nd2	1.065	1.065	0.0031	0	0	0
27	p24h.nd2	1.2899	1.0932	0.6847	0	0	0
28	p24h.nd2	1.5502	1.502	0.3836	0	0	0
29	p24h.nd2	6.1275	6.1256	0.1525	0	0	0
30	p24h.nd2	10.3321	9.4322	4.2174	0	0	0
31	p24h.nd2	8.1819	7.6705	2.8472	0	0	0
32	p24h.nd2	14.0261	14.0075	0.7233	0	0	0
33	p24h.nd2	2.0803	2.0803	0	0	0	0
34	p24h.nd2	0.5538	0.5538	0	0	0	0
35	p24h.nd2	3.3918	1.3008	3.1324	0	0	0
36	p24h.nd2	5.7955	5.7713	0.5284	0	0	0
37	p24h.nd2	1.4557	1.4557	0.011	0	0	0
38	p24h.nd2	0.5096	0.5094	0.0123	0	0	0
39	p24h.nd2	0.3814	0.3812	0.0128	0	0	0
40	p24h.nd2	0.75	0.221	0.7167	0	0	0
41	p24h.nd2	1.5032	0.2101	1.4884	0	0	0
42	p24h.nd2	17.2407	17.1715	1.5435	0	0	0
43	p24h.nd2	16.3713	15.7178	4.5793	0	0	0
44	p24h.nd2	10.8253	10.8253	0	0	0	0
45	p24h.nd2	7.7595	7.7595	0	0	0	0
46	p24h.nd2	8.3467	8.3467	0	0	0	0
47	p24h.nd2	0	0	0	0	0	0
48	p24h.nd2	0	0	0	0	0	0
49	p24h.nd2	0	0	0	0	0	0
50	p24h.nd2	0.6351	0.2582	0.5802	0	0	0
51	p24h.nd2	0.1216	0.1216	0	0	0	0
52	p24h.nd2	0	0	0	0	0	0
53	p24h.nd2	0	0	0	0	0	0
54	p24h.nd2	0	0	0	0	0	0
55	p24h.nd2	0	0	0	0	0	0
56	p24h.nd2	0	0	0	0	0	0
57	p24h.nd2	1.9111	1.9111	0	0	0	0
58	p24h.nd2	1.9404	1.9404	0	0	0	0
59	p24h.nd2	0.5206	0.5206	0	0	0	0
60	p24h.nd2	1.0633	1.0633	0	0	0	0
61	p24h.nd2	0.8644	0.8644	0	0	0	0
62	p24h.nd2	0	0	0	0	0	0
63	p24h.nd2	0	0	0	0	0	0
64	p24h.nd2	1.0778	1.0778	0	0	0	0
65	p24h.nd2	0.132	0.132	0	0	0	0
66	p24h.nd2	0	0	0	0	0	0
67	p24h.nd2	0.5186	0.5186	0.0002	0	0	0
68	p24h.nd2	3.5114	1.344	3.244	0	0	0
69	p24h.nd2	0	0	0	0	0	0
70	p24h.nd2	0.4925	0.4925	0	0	0	0
71	p24h.nd2	2.1206	0.7375	1.9882	0	0	0
72	p24h.nd2	1.0095	0.7406	0.6861	0	0	0
73	p24h.nd2	0.2481	0.2481	0.0004	0	0	0
74	p24h.nd2	0.7931	0.3987	0.6856	0	0	0
75	p24h.nd2	2.0966	1.5748	1.3842	0	0	0
76	p24h.nd2	0.2801	0.2801	0.0038	0	0	0
77	p24h.nd2	0	0	0	0	0	0
78	p24h.nd2	2.5985	1.4621	2.1481	0	0	0
79	p24h.nd2	4.3011	2.3456	3.6052	0	0	0
80	p24h.nd2	1.0781	1.0781	0	0	0	0
81	p24h.nd2	5.0697	5.0697	0	0	0	0
82	p24h.nd2	6.9807	6.9523	0.6291	0	0	0
83	p24h.nd2	7.3058	6.9402	2.2822	0	0	0
84	p24h.nd2	5.3313	2.7679	4.5565	0	0	0
85	p24h.nd2	13.8799	13.8709	0.5008	0	0	0
86	p24h.nd2	5.2253	5.2253	0	0	0	0
87	p24h.nd2	6.1112	5.7038	2.1941	0	0	0
88	p24h.nd2	22.3165	22.0546	3.409	0	0	0
89	p24h.nd2	9.6865	8.9311	3.7502	0	0	0
90	p24h.nd2	8.983	8.6578	2.3954	0	0	0
91	p24h.nd2	16.0513	15.9548	1.7567	0	0	0
92	p24h.nd2	14.1061	12.955	5.5812	0	0	0
93	p24h.nd2	6.1593	6.1591	0.0494	0	0	0
94	p24h.nd2	0.0977	0.0977	5e-05	0	0	0
95	p24h.nd2	0	0	0	0	0	0
96	p24h.nd2	0	0	0	0	0	0
97	p24h.nd2	0	0	0	0	0	0
98	p24h.nd2	4.7357	4.7357	0	0	0	0
99	p24h.nd2	3.6258	3.3175	1.4631	0	0	0
100	p24h.nd2	0.5838	0.5838	0.001	0	0	0
101	p24h.nd2	0.9579	0.9579	0	0	0	0
102	p24h.nd2	12.4348	12.3514	1.4376	0	0	0
103	p24h.nd2	1.7829	1.1596	1.3543	0	0	0
104	p24h.nd2	1.0365	0.7884	0.6728	0	0	0
105	p24h.nd2	0.2445	0.2445	0	0	0	0
106	p24h.nd2	4.3534	4.3035	0.6574	0	0	0
107	p24h.nd2	1.3262	1.3262	0.0053	0	0	0
108	p24h.nd2	9.1259	9.1259	0	0	0	0
109	p24h.nd2	12.5668	12.425	1.8825	0	0	0
110	p24h.nd2	2.6821	1.0458	2.4698	0	0	0
111	p24h.nd2	10.9186	10.7504	1.9094	0	0	0
112	p24h.nd2	12.4887	12.4887	0	0	0	0
113	p24h.nd2	11.889	11.889	0	0	0	0
114	p24h.nd2	29.9024	29.8234	2.1724	0	0	0
115	p24h.nd2	7.3562	7.1907	1.5512	0	0	0
116	p24h.nd2	9.454	9.3223	1.5728	0	0	0
117	p24h.nd2	3.8549	3.7736	0.7879	0	0	0
Feature	Mean	St.Dev	Minimum	Maximum
Length xyz	4.138	5.531	0	29.9024
Length xy	3.9127	5.4968	0	29.8234
Height	0.8008	1.2447	0	5.5812
Item	Source	Length xyz	Length xy	Height	ND.T	ND.Z	ND.M	Comment
1	p24h.nd2	3.8637	3.8637	0.0022	0	0	0
2	p24h.nd2	0.2876	0.2876	0.0001	0	0	0
3	p24h.nd2	0.2071	0.2071	0	0	0	0
4	p24h.nd2	0	0	0	0	0	0
5	p24h.nd2	2.6302	1.182	2.3496	0	0	0
6	p24h.nd2	0.2107	0.2107	2e-05	0	0	0
7	p24h.nd2	0	0	0	0	0	0
8	p24h.nd2	0.6408	0.6408	0.0001	0	0	0
9	p24h.nd2	4.1758	1.7242	3.8032	0	0	0
10	p24h.nd2	0	0	0	0	0	0
11	p24h.nd2	3.256	0.5546	3.2084	0	0	0
12	p24h.nd2	2.0789	2.0789	0.0021	0	0	0
13	p24h.nd2	0	0	0	0	0	0
14	p24h.nd2	0.0869	0.0869	0	0	0	0
15	p24h.nd2	0	0	0	0	0	0
16	p24h.nd2	27.4528	26.9054	5.4553	0	0	0
17	p24h.nd2	11.5828	11.1436	3.159	0	0	0
18	p24h.nd2	5.0195	4.7613	1.589	0	0	0
19	p24h.nd2	0.4116	0.4116	0	0	0	0
20	p24h.nd2	1.7179	1.7179	0	0	0	0
21	p24h.nd2	0	0	0	0	0	0
22	p24h.nd2	1.4023	1.4023	0	0	0	0
23	p24h.nd2	3.3072	3.3072	0	0	0	0
24	p24h.nd2	0	0	0	0	0	0
25	p24h.nd2	0	0	0	0	0	0
26	p24h.nd2	0	0	0	0	0	0
27	p24h.nd2	0	0	0	0	0	0
28	p24h.nd2	0.0923	0.0923	0	0	0	0
29	p24h.nd2	0.5381	0.5381	0	0	0	0
30	p24h.nd2	1.3888	1.1562	0.7694	0	0	0
31	p24h.nd2	0.7437	0.7437	0	0	0	0
32	p24h.nd2	1.3933	1.242	0.6313	0	0	0
33	p24h.nd2	0	0	0	0	0	0
34	p24h.nd2	0.8364	0.4835	0.6824	0	0	0
35	p24h.nd2	2.1635	0.833	1.9967	0	0	0
36	p24h.nd2	0.3235	0.3235	0	0	0	0
37	p24h.nd2	0.517	0.517	0.0005	0	0	0
38	p24h.nd2	0.7389	0.7389	0	0	0	0
39	p24h.nd2	0.491	0.491	0	0	0	0
40	p24h.nd2	0	0	0	0	0	0
41	p24h.nd2	0	0	0	0	0	0
42	p24h.nd2	0	0	0	0	0	0
43	p24h.nd2	0	0	0	0	0	0
44	p24h.nd2	0.1195	0.1195	0	0	0	0
45	p24h.nd2	0	0	0	0	0	0
46	p24h.nd2	0	0	0	0	0	0
47	p24h.nd2	11.1072	10.3443	4.0456	0	0	0
48	p24h.nd2	8.7329	8.4049	2.371	0	0	0
49	p24h.nd2	12.9933	12.993	0.0883	0	0	0
50	p24h.nd2	9.4896	8.3529	4.5036	0	0	0
51	p24h.nd2	12.9335	10.6643	7.3177	0	0	0
52	p24h.nd2	10.1584	9.9081	2.2411	0	0	0
53	p24h.nd2	10.9653	10.3301	3.6778	0	0	0
54	p24h.nd2	11.69	11.343	2.8271	0	0	0
55	p24h.nd2	8.771	8.5039	2.148	0	0	0
56	p24h.nd2	5.6403	5.6403	0	0	0	0
57	p24h.nd2	0.4639	0.4639	0	0	0	0
58	p24h.nd2	0	0	0	0	0	0
59	p24h.nd2	0	0	0	0	0	0
60	p24h.nd2	0	0	0	0	0	0
61	p24h.nd2	1.5693	0.248	1.5495	0	0	0
62	p24h.nd2	0	0	0	0	0	0
63	p24h.nd2	0.6909	0.6909	0.0046	0	0	0
64	p24h.nd2	0	0	0	0	0	0
65	p24h.nd2	0	0	0	0	0	0
66	p24h.nd2	7.3772	6.6393	3.2159	0	0	0
67	p24h.nd2	0	0	0	0	0	0
68	p24h.nd2	0	0	0	0	0	0
69	p24h.nd2	17.825	17.825	0	0	0	0
70	p24h.nd2	0	0	0	0	0	0
71	p24h.nd2	0	0	0	0	0	0
72	p24h.nd2	0	0	0	0	0	0
73	p24h.nd2	15.9917	15.8137	2.3797	0	0	0
74	p24h.nd2	18.178	17.5675	4.6716	0	0	0
75	p24h.nd2	13.3675	13.1497	2.4035	0	0	0
76	p24h.nd2	0	0	0	0	0	0
77	p24h.nd2	0	0	0	0	0	0
78	p24h.nd2	5.4191	5.4191	0.0003	0	0	0
79	p24h.nd2	0	0	0	0	0	0
80	p24h.nd2	0	0	0	0	0	0
81	p24h.nd2	8.7047	8.6673	0.8063	0	0	0
82	p24h.nd2	9.6097	9.4736	1.6114	0	0	0
83	p24h.nd2	5.6116	5.0639	2.418	0	0	0
84	p24h.nd2	9.4226	7.5677	5.6138	0	0	0
85	p24h.nd2	0.807	0.0641	0.8044	0	0	0
86	p24h.nd2	1.2655	0.9731	0.809	0	0	0
87	p24h.nd2	1.7155	0.5963	1.6085	0	0	0
88	p24h.nd2	0.7478	0.7478	0.0006	0	0	0
89	p24h.nd2	27.298	26.8654	4.8406	0	0	0
90	p24h.nd2	26.0485	25.6056	4.783	0	0	0
91	p24h.nd2	0.2593	0.2593	0.0004	0	0	0
92	p24h.nd2	9.9051	9.0476	4.0314	0	0	0
93	p24h.nd2	6.3677	6.3675	0.0521	0	0	0
Feature	Mean	St.Dev	Minimum	Maximum
Length xyz	3.9656	6.2676	0	27.4528
Length xy	3.6921	6.126	0	26.9054
Height	1.0159	1.6787	0	7.3177
Item	Source	Length xyz	Length xy	Height	ND.T	ND.Z	ND.M	Comment
1	p24h001.nd2	6.2768	5.8005	2.3984	0	0	0
2	p24h001.nd2	0	0	0	0	0	0
3	p24h001.nd2	0.5257	0.5186	0.0861	0	0	0
4	p24h001.nd2	0.2559	0.2559	0.0006	0	0	0
5	p24h001.nd2	0	0	0	0	0	0
6	p24h001.nd2	0	0	0	0	0	0
7	p24h001.nd2	0.7476	0.7083	0.2391	0	0	0
8	p24h001.nd2	1.0676	0.7425	0.7671	0	0	0
9	p24h001.nd2	0.4928	0.4928	0.0012	0	0	0
10	p24h001.nd2	10.7489	10.4858	2.3637	0	0	0
11	p24h001.nd2	2.5663	0.9093	2.3999	0	0	0
12	p24h001.nd2	0.5471	0.5471	0.0004	0	0	0
13	p24h001.nd2	0	0	0	0	0	0
14	p24h001.nd2	1.363	1.363	0.0012	0	0	0
15	p24h001.nd2	3.1796	3.1796	0.0028	0	0	0
16	p24h001.nd2	0.8429	0.8429	0.0003	0	0	0
17	p24h001.nd2	2.2997	1.6195	1.6327	0	0	0
18	p24h001.nd2	0	0	0	0	0	0
19	p24h001.nd2	0	0	0	0	0	0
20	p24h001.nd2	0	0	0	0	0	0
21	p24h001.nd2	0	0	0	0	0	0
22	p24h001.nd2	0	0	0	0	0	0
23	p24h001.nd2	0.819	0.6459	0.5036	0	0	0
24	p24h001.nd2	0.9904	0.9904	0	0	0	0
25	p24h001.nd2	1.7947	1.609	0.7951	0	0	0
26	p24h001.nd2	1.2174	0.9243	0.7923	0	0	0
27	p24h001.nd2	1.2219	1.2218	0.0124	0	0	0
28	p24h001.nd2	0.6626	0.6626	0.0078	0	0	0
29	p24h001.nd2	1.3153	1.3153	0.0017	0	0	0
30	p24h001.nd2	1.9486	1.7928	0.7637	0	0	0
31	p24h001.nd2	0.4415	0.4414	0.0036	0	0	0
32	p24h001.nd2	0.6507	0.6507	0.0003	0	0	0
33	p24h001.nd2	0.9252	0.9252	0.0075	0	0	0
34	p24h001.nd2	0	0	0	0	0	0
35	p24h001.nd2	0.825	0.3255	0.7581	0	0	0
36	p24h001.nd2	9.8406	9.5713	2.2865	0	0	0
37	p24h001.nd2	0	0	0	0	0	0
38	p24h001.nd2	0.6546	0.6546	0	0	0	0
39	p24h001.nd2	4.2637	4.2637	0.009	0	0	0
40	p24h001.nd2	10.6989	9.9364	3.9665	0	0	0
41	p24h001.nd2	0.6283	0.6283	0.0012	0	0	0
42	p24h001.nd2	5.9132	3.4278	4.8183	0	0	0
43	p24h001.nd2	0.724	0.724	0.0004	0	0	0
44	p24h001.nd2	6.4371	4.2154	4.8649	0	0	0
45	p24h001.nd2	2.5266	0.6489	2.4419	0	0	0
46	p24h001.nd2	5.297	2.0437	4.8869	0	0	0
47	p24h001.nd2	2.704	2.5876	0.7849	0	0	0
48	p24h001.nd2	2.474	0.6936	2.3748	0	0	0
49	p24h001.nd2	2.2838	2.2838	0.0022	0	0	0
50	p24h001.nd2	4.8384	4.1951	2.4108	0	0	0
51	p24h001.nd2	5.0767	4.4599	2.4254	0	0	0
52	p24h001.nd2	0	0	0	0	0	0
53	p24h001.nd2	0.5384	0.5384	0	0	0	0
54	p24h001.nd2	0.797	0.797	0.0052	0	0	0
55	p24h001.nd2	2.1344	2.1344	0.0093	0	0	0
56	p24h001.nd2	0.2999	0.0525	0.2952	0	0	0
57	p24h001.nd2	0.9346	0.5232	0.7744	0	0	0
58	p24h001.nd2	0.6405	0.6405	0	0	0	0
59	p24h001.nd2	1.5362	1.339	0.753	0	0	0
60	p24h001.nd2	4.594	2.6788	3.7321	0	0	0
61	p24h001.nd2	1.9462	1.2849	1.4618	0	0	0
62	p24h001.nd2	5.4659	2.0246	5.0771	0	0	0
63	p24h001.nd2	3.1723	3.0689	0.803	0	0	0
64	p24h001.nd2	9.944	9.8106	1.6232	0	0	0
65	p24h001.nd2	0.2429	0.2429	0.0009	0	0	0
66	p24h001.nd2	0.7298	0.7298	0.0031	0	0	0
67	p24h001.nd2	10.2298	7.3536	7.1114	0	0	0
68	p24h001.nd2	4.049	2.5432	3.1507	0	0	0
69	p24h001.nd2	1.1261	0.7785	0.8136	0	0	0
70	p24h001.nd2	12.368	12.3459	0.7377	0	0	0
71	p24h001.nd2	5.3931	5.3931	0.0104	0	0	0
72	p24h001.nd2	5.752	5.2106	2.4363	0	0	0
73	p24h001.nd2	5.0923	5.0327	0.7772	0	0	0
74	p24h001.nd2	10.3729	9.6044	3.9183	0	0	0
75	p24h001.nd2	3.488	3.4879	0.0266	0	0	0
76	p24h001.nd2	9.4414	9.441	0.0854	0	0	0
77	p24h001.nd2	2.9123	2.9123	0	0	0	0
78	p24h001.nd2	0.0775	0.0775	0.001	0	0	0
79	p24h001.nd2	0	0	0	0	0	0
80	p24h001.nd2	0	0	0	0	0	0
81	p24h001.nd2	0	0	0	0	0	0
82	p24h001.nd2	0	0	0	0	0	0
83	p24h001.nd2	2.3592	2.3592	0	0	0	0
84	p24h001.nd2	2.8641	2.7655	0.7453	0	0	0
85	p24h001.nd2	2.9956	2.9956	0	0	0	0
86	p24h001.nd2	3.8919	3.8918	0.0191	0	0	0
87	p24h001.nd2	0.3588	0.3588	0.0007	0	0	0
88	p24h001.nd2	0.583	0.583	0	0	0	0
89	p24h001.nd2	1.0344	1.0344	0	0	0	0
90	p24h001.nd2	1.6595	0.9874	1.3337	0	0	0
91	p24h001.nd2	2.0876	1.9754	0.675	0	0	0
92	p24h001.nd2	2.2753	2.1688	0.6879	0	0	0
93	p24h001.nd2	0.1979	0.1979	0	0	0	0
94	p24h001.nd2	1.4218	0.128	1.416	0	0	0
95	p24h001.nd2	14.2704	14.2473	0.8121	0	0	0
96	p24h001.nd2	18.0488	18.0488	0.0395	0	0	0
97	p24h001.nd2	0.4633	0.4633	0	0	0	0
98	p24h001.nd2	3.5441	3.4447	0.8337	0	0	0
99	p24h001.nd2	0.4629	0.4628	0.0034	0	0	0
100	p24h001.nd2	0.3588	0.3588	0	0	0	0
101	p24h001.nd2	0.34	0.34	0	0	0	0
102	p24h001.nd2	3.7809	3.7748	0.2144	0	0	0
103	p24h001.nd2	0	0	0	0	0	0
104	p24h001.nd2	8.0239	8.007	0.5209	0	0	0
105	p24h001.nd2	0	0	0	0	0	0
106	p24h001.nd2	0.2229	0.1575	0.1577	0	0	0
107	p24h001.nd2	0	0	0	0	0	0
108	p24h001.nd2	0	0	0	0	0	0
109	p24h001.nd2	3.6322	3.6162	0.3397	0	0	0
Feature	Mean	St.Dev	Minimum	Maximum
Length xyz	2.6261	3.4515	0	18.0488
Length xy	2.3093	3.3084	0	18.0488
Height	0.791	1.38	0	7.1114
Item	Source	Length xyz	Length xy	Height	ND.T	ND.Z	ND.M	Comment
1	p24h001.nd2	0.7429	0.7429	0.0023	0	0	0
2	p24h001.nd2	1.2395	0.9465	0.8003	0	0	0
3	p24h001.nd2	0.8521	0.3127	0.7927	0	0	0
4	p24h001.nd2	0.9049	0.4265	0.7981	0	0	0
5	p24h001.nd2	0.8277	0.2182	0.7984	0	0	0
6	p24h001.nd2	0.5828	0.5828	0.0034	0	0	0
7	p24h001.nd2	1.1317	0.7994	0.801	0	0	0
8	p24h001.nd2	0.9066	0.4188	0.804	0	0	0
9	p24h001.nd2	1.3255	1.0558	0.8014	0	0	0
10	p24h001.nd2	0.7243	0.7243	0	0	0	0
11	p24h001.nd2	9.4671	8.9652	3.0414	0	0	0
12	p24h001.nd2	0.3846	0.3845	0.0053	0	0	0
13	p24h001.nd2	0.0669	0.0669	0	0	0	0
14	p24h001.nd2	0	0	0	0	0	0
15	p24h001.nd2	0.3278	0.3278	0.0014	0	0	0
16	p24h001.nd2	0.1999	0.1999	0.0003	0	0	0
17	p24h001.nd2	2.5953	1.632	2.0179	0	0	0
18	p24h001.nd2	0.6975	0.1564	0.6798	0	0	0
19	p24h001.nd2	0.1284	0.1284	0	0	0	0
20	p24h001.nd2	0.375	0.3746	0.0159	0	0	0
21	p24h001.nd2	0.322	0.322	0.0011	0	0	0
22	p24h001.nd2	2.2252	0.5842	2.1472	0	0	0
23	p24h001.nd2	0.7084	0.0452	0.7069	0	0	0
24	p24h001.nd2	1.6858	0.8773	1.4396	0	0	0
25	p24h001.nd2	0.7655	0.2263	0.7313	0	0	0
26	p24h001.nd2	0.8544	0.472	0.7122	0	0	0
27	p24h001.nd2	0.4272	0.4272	0.003	0	0	0
28	p24h001.nd2	10.6345	7.9858	7.0228	0	0	0
29	p24h001.nd2	0	0	0	0	0	0
30	p24h001.nd2	4.9736	2.6049	4.2369	0	0	0
31	p24h001.nd2	11.0598	10.6223	3.08	0	0	0
32	p24h001.nd2	3.8907	2.0221	3.324	0	0	0
33	p24h001.nd2	0.8118	0.4658	0.6649	0	0	0
34	p24h001.nd2	3.2628	2.0746	2.5183	0	0	0
35	p24h001.nd2	7.695	7.6171	1.0922	0	0	0
36	p24h001.nd2	9.6939	9.6939	0	0	0	0
37	p24h001.nd2	3.4172	3.4172	0.0137	0	0	0
38	p24h001.nd2	0	0	0	0	0	0
39	p24h001.nd2	0.3125	0.3125	0.0012	0	0	0
40	p24h001.nd2	1.8947	1.8947	0	0	0	0
41	p24h001.nd2	0.197	0.197	0.0017	0	0	0
42	p24h001.nd2	0	0	0	0	0	0
43	p24h001.nd2	0	0	0	0	0	0
44	p24h001.nd2	0	0	0	0	0	0
45	p24h001.nd2	0	0	0	0	0	0
46	p24h001.nd2	0	0	0	0	0	0
47	p24h001.nd2	0	0	0	0	0	0
48	p24h001.nd2	10.3636	10.3385	0.7214	0	0	0
49	p24h001.nd2	11.6653	10.6471	4.7664	0	0	0
50	p24h001.nd2	8.6115	8.6115	0	0	0	0
51	p24h001.nd2	13.2307	12.8996	2.9414	0	0	0
52	p24h001.nd2	1.5554	0.2654	1.5326	0	0	0
53	p24h001.nd2	1.6505	0.6855	1.5014	0	0	0
54	p24h001.nd2	0.9216	0.5561	0.7349	0	0	0
55	p24h001.nd2	2.2672	0.6452	2.1735	0	0	0
56	p24h001.nd2	0.6964	0.6964	0	0	0	0
57	p24h001.nd2	0.2141	0.2141	0.0033	0	0	0
58	p24h001.nd2	0.6271	0.6271	0.0088	0	0	0
59	p24h001.nd2	1.0254	0.6584	0.7861	0	0	0
60	p24h001.nd2	17.5128	17.1154	3.7094	0	0	0
61	p24h001.nd2	2.9779	0.8766	2.846	0	0	0
62	p24h001.nd2	0.7688	0.2727	0.7188	0	0	0
63	p24h001.nd2	1.6228	0.6728	1.4767	0	0	0
64	p24h001.nd2	0.8783	0.4468	0.7562	0	0	0
65	p24h001.nd2	1.613	0.4898	1.5369	0	0	0
66	p24h001.nd2	0.7587	0.7587	0.0069	0	0	0
67	p24h001.nd2	10.0109	9.2011	3.9445	0	0	0
68	p24h001.nd2	0.8542	0.3304	0.7878	0	0	0
69	p24h001.nd2	0.4438	0.2761	0.3475	0	0	0
70	p24h001.nd2	0.137	0.137	0.0001	0	0	0
71	p24h001.nd2	0	0	0	0	0	0
72	p24h001.nd2	0.3827	0.1188	0.3638	0	0	0
73	p24h001.nd2	0.1538	0.1538	0.0012	0	0	0
74	p24h001.nd2	0.46	0.4599	0.0074	0	0	0
75	p24h001.nd2	1.9585	1.7954	0.7825	0	0	0
76	p24h001.nd2	0.8611	0.327	0.7966	0	0	0
77	p24h001.nd2	1.6653	0.4254	1.6101	0	0	0
78	p24h001.nd2	1.6368	0.2525	1.6172	0	0	0
Feature	Mean	St.Dev	Minimum	Maximum
Length xyz	2.3825	3.7017	0	17.5128
Length xy	1.9395	3.5861	0	17.1154
Height	0.9685	1.3486	0	7.0228
