# Supplementary material for: Glial insulin regulates cooperative or antagonistic Golden goal/Flamingo interactions during photoreceptor axon guidance
Source: eLife. 2021 Mar 5;10:e66718. doi: 10.7554/eLife.66718 (PMC7987344; doi:10.7554/eLife.66718)
Supplement: Figure 4—source data 1. [file elife-66718-fig4-data1.xlsx]

## Sheet: 4D
R8									gogo
0	92	0	99	0	72	0	32		0	17	0	0	0	4	0	29		0.00521536	0.00534653	0.00461941	0.00218849	0.00434245		0.00132809	0	0.000346158	0.00222174	0.000973997
1	98.791	1	106.276	1	72.956	1	32.264		1	22.3	1	0	1	2.751	1	24.804		0.00560034	0.00573947	0.00468075	0.00220655	0.00455678		0.00174214	0	0.00023807	0.00190028	0.000970122
2	105.61	2	104.149	2	75.793	2	29.72		2	38.555	2	0	2	7.188	2	22.15		0.0059869	0.0056246	0.00486276	0.00203256	0.00462671		0.00301202	0	0.000622047	0.00169695	0.00133276
3	116.137	3	114.222	3	84.649	3	36.019		3	52.144	3	2.565	3	22.784	3	11.816		0.00658366	0.0061686	0.00543095	0.00246336	0.00516164		0.00407363	0.000242462	0.00197172	0.000905246	0.00179826
4	123.322	4	132.589	4	89.541	4	44.816		4	68.726	4	6.571	4	32.237	4	7.497		0.00699097	0.00716051	0.00574481	0.00306499	0.00574032		0.00536906	0.000621137	0.00278978	0.000574359	0.00233858
5	126.254	5	146.516	5	86.054	5	50.977		5	68.035	5	13.253	5	48.037	5	15.739		0.00715718	0.00791264	0.00552109	0.00348634	0.00601931		0.00531508	0.00125277	0.0041571	0.00120579	0.00298269
6	131.162	6	158.761	6	83.44	6	63.866		6	73.452	6	20.209	6	57.338	6	20.196		0.00743541	0.00857394	0.00535338	0.00436782	0.00643264		0.00573827	0.0019103	0.00496201	0.00154725	0.00353946
7	141.887	7	162.83	7	85.134	7	83.474		7	91.942	7	22.92	7	59.46	7	20.237		0.00804339	0.00879369	0.00546207	0.00570883	0.00700199		0.00718276	0.00216656	0.00514565	0.00155039	0.00401134
8	151.685	8	163.182	8	86.031	8	94.881		8	99.272	8	17.504	8	63.885	8	21.951		0.00859883	0.0088127	0.00551962	0.00648895	0.00735502		0.0077554	0.0016546	0.00552858	0.00168171	0.00415507
9	159.386	9	164.659	9	85.697	9	98.097		9	85.931	9	30.695	9	68.461	9	30.482		0.00903539	0.00889246	0.00549819	0.0067089	0.00753374		0.00671316	0.00290151	0.00592459	0.00233528	0.00446864
10	163.657	10	165.613	10	88.425	10	106.566		10	74.836	10	56.43	10	64.925	10	32.045		0.00927751	0.00894398	0.00567321	0.0072881	0.0077957		0.00584639	0.00533416	0.00561858	0.00245503	0.00481354
11	163.994	11	165.55	11	95.601	11	119.738		11	66.282	11	87.831	11	60.54	11	34.69		0.00929661	0.00894058	0.00613361	0.00818894	0.00813994		0.00517813	0.00830241	0.00523911	0.00265767	0.00534433
12	163.945	12	164.004	12	99.198	12	130.711		12	64.037	12	106.553	12	69.957	12	52.832		0.00929383	0.00885709	0.00636439	0.00893939	0.00836368		0.00500274	0.0100721	0.00605405	0.00404756	0.00629412
13	168.059	13	163.518	13	99.119	13	140.212		13	69.794	13	104.306	13	85.575	13	82.785		0.00952705	0.00883084	0.00635932	0.00958916	0.0085766		0.0054525	0.00985974	0.00740563	0.00634231	0.00726505
14	171.637	14	161.737	14	103.886	14	154.316		14	72.843	14	99.09	14	82.275	14	118.063		0.00972988	0.00873466	0.00666517	0.0105537	0.00892086		0.00569069	0.00936669	0.00712005	0.00904503	0.00780561
15	172.838	15	159.286	15	109.494	15	165.026		15	66.087	15	91.116	15	65.822	15	146.071		0.00979797	0.00860229	0.00702497	0.0112862	0.00917786		0.0051629	0.00861293	0.00569621	0.0111908	0.0076657
16	172.08	16	159.005	16	108.053	16	167.285		16	60.808	16	77.602	16	53.299	16	161.563		0.009755	0.00858712	0.00693251	0.0114407	0.00917883		0.00475049	0.00733549	0.00461248	0.0123776	0.00726902
17	175.506	17	172.74	17	108.467	17	167.495		17	75.838	17	60.824	17	47.201	17	172.944		0.00994921	0.00932888	0.00695908	0.0114551	0.00942306		0.00592467	0.00574952	0.00408476	0.0132496	0.00725213
18	181.306	18	194.328	18	112.423	18	165.669		18	80.089	18	53.817	18	39.958	18	183.753		0.010278	0.0104947	0.00721289	0.0113302	0.00982896		0.00625677	0.00508716	0.00345795	0.0140777	0.00721989
19	184.019	19	209.073	19	110.522	19	162.176		19	85.863	19	47.555	19	23.685	19	196.334		0.0104318	0.0112911	0.00709092	0.0110913	0.00997627		0.00670785	0.00449524	0.00204969	0.0150415	0.00707357
20	188.563	20	211.669	20	116.537	20	154.351		20	91.169	20	47.086	20	46.853	20	200.529		0.0106894	0.0114313	0.00747684	0.0105561	0.0100384		0.00712237	0.0044509	0.00405464	0.0153629	0.0077477
21	192.041	21	213	21	126.843	21	148.67		21	99.372	21	38.841	21	86.643	21	201.137		0.0108866	0.0115031	0.00813805	0.0101676	0.0101738		0.00776321	0.00367153	0.00749805	0.0154095	0.00858557
22	191.593	22	214.241	22	135.601	22	143.755		22	109.059	22	45.216	22	102.077	22	203.932		0.0108612	0.0115702	0.00869995	0.00983147	0.0102407		0.00851998	0.00427414	0.0088337	0.0156236	0.00931286
23	194.057	23	213.053	23	142.562	23	138.004		23	120.803	23	69.174	23	106.457	23	210.91		0.0110008	0.011506	0.00914656	0.00943816	0.0102729		0.00943746	0.00653882	0.00921275	0.0161582	0.0103368
24	200.809	24	205.524	24	150.977	24	134.172		24	144.927	24	67.862	24	113.651	24	221.81		0.0113836	0.0110994	0.00968645	0.00917608	0.0103364		0.0113221	0.0064148	0.00983531	0.0169933	0.0111414
25	208.255	25	187.949	25	164.041	25	133.41		25	159.062	25	52.575	25	140.502	25	220.436		0.0118057	0.0101502	0.0105246	0.00912397	0.0104011		0.0124264	0.00496976	0.012159	0.016888	0.0116108
26	212.377	26	181.76	26	175.609	26	141.377		26	153.718	26	55.26	26	169.783	26	222.415		0.0120394	0.00981601	0.0112668	0.00966884	0.0106978		0.0120089	0.00522357	0.014693	0.0170396	0.0122413
27	214.098	27	185.47	27	180.398	27	152.767		27	155.591	27	74.889	27	176.607	27	231.95		0.0121369	0.0100164	0.0115741	0.0104478	0.0110438		0.0121552	0.00707904	0.0152835	0.0177701	0.013072
28	215.395	28	189.697	28	181.804	28	160.381		28	170.926	28	85.729	28	179.913	28	243.576		0.0122105	0.0102446	0.0116643	0.0109685	0.011272		0.0133532	0.00810371	0.0155696	0.0186608	0.0139218
29	215.662	29	192.77	29	183.434	29	166.795		29	179.384	29	94.708	29	190.318	29	252.085		0.0122256	0.0104106	0.0117688	0.0114072	0.0114531		0.014014	0.00895247	0.01647	0.0193127	0.0146873
30	216.481	30	192.998	30	185.423	30	172.869		30	180.926	30	115.575	30	203.619	30	254.974		0.012272	0.0104229	0.0118965	0.0118226	0.0116035		0.0141344	0.010925	0.0176211	0.019534	0.0155536
31	215.144	31	192.695	31	188.928	31	176.435		31	190.71	31	132.668	31	215.993	31	255		0.0121962	0.0104066	0.0121213	0.0120665	0.0116976		0.0148988	0.0125407	0.018692	0.019536	0.0164169
32	212.294	32	193.896	32	191.171	32	179.817		32	203.994	32	127.05	32	223.01	32	255		0.0120347	0.0104714	0.0122652	0.0122978	0.0117673		0.0159366	0.0120097	0.0192992	0.019536	0.0166954
33	212.239	33	199.046	33	188.061	33	184.974		33	198.362	33	118.74	33	224.586	33	255		0.0120316	0.0107495	0.0120657	0.0126505	0.0118743		0.0154966	0.0112241	0.0194356	0.019536	0.0164231
34	212.769	34	205.988	34	184.925	34	191.376		34	174.487	34	125.376	34	231.825	34	255		0.0120616	0.0111244	0.0118645	0.0130883	0.0120347		0.0136314	0.0118514	0.020062	0.019536	0.0162702
35	207.163	35	211.549	35	187.847	35	196.167		35	141.781	35	128.941	35	246.883	35	255		0.0117438	0.0114248	0.012052	0.013416	0.0121591		0.0110763	0.0121884	0.0213652	0.019536	0.0160415
36	199.685	36	211.108	36	194.188	36	199.888		36	112.159	36	121.267	36	242.395	36	255		0.0113199	0.011401	0.0124588	0.0136704	0.0122125		0.00876217	0.011463	0.0209768	0.019536	0.0151845
37	198.364	37	208.678	37	200.631	37	201.692		37	106.238	37	118.675	37	218.595	37	255		0.011245	0.0112697	0.0128722	0.0137938	0.0122952		0.0082996	0.011218	0.0189171	0.019536	0.0144927
38	195.661	38	208.612	38	202.638	38	201.252		38	101.903	38	124.893	38	210.535	38	255		0.0110918	0.0112662	0.0130009	0.0137637	0.0122806		0.00796094	0.0118058	0.0182196	0.019536	0.0143806
39	186.723	39	207.139	39	200.615	39	206.789		39	82.563	39	129.641	39	216.722	39	255		0.0105851	0.0111866	0.0128712	0.0141424	0.0121963		0.00645005	0.0122546	0.018755	0.019536	0.0142489
40	178.079	40	199.812	40	197.938	40	211.344		40	70.376	40	131.401	40	211.744	40	255		0.0100951	0.0107909	0.0126994	0.0144539	0.0120098		0.00549796	0.012421	0.0183242	0.019536	0.0139448
41	174.281	41	192.257	41	196.277	41	200.145		41	75.423	41	134.016	41	202.453	41	254.755		0.00987977	0.0103829	0.0125928	0.013688	0.0116359		0.00589225	0.0126681	0.0175202	0.0195173	0.0138995
42	174.97	42	190.845	42	195.753	42	184.309		42	78.589	42	134.086	42	196.084	42	250.964		0.00991883	0.0103066	0.0125592	0.012605	0.0113474		0.00613959	0.0126748	0.016969	0.0192268	0.0137526
43	178.139	43	194.483	43	191.82	43	175.021		43	78.864	43	126.133	43	184.324	43	236.87		0.0100985	0.0105031	0.0123069	0.0119698	0.0112196		0.00616107	0.011923	0.0159513	0.0181471	0.0130456
44	178.686	44	204.657	44	185.472	44	168.485		44	84.984	44	118.113	44	162.133	44	212.842		0.0101295	0.0110526	0.0118996	0.0115228	0.0111511		0.00663918	0.0111649	0.0140309	0.0163062	0.0120353
45	179.901	45	206.453	45	183.743	45	163.866		45	90.547	45	119.179	45	137.377	45	192.985		0.0101984	0.0111496	0.0117887	0.0112069	0.0110859		0.00707378	0.0112656	0.0118886	0.0147849	0.0112532
46	178.559	46	202.065	46	190.356	46	161.618		46	94.935	46	117.73	46	138.611	46	166.164		0.0101223	0.0109126	0.0122129	0.0110531	0.0110752		0.00741658	0.0111287	0.0119953	0.0127301	0.0108177
47	181.244	47	203.524	47	188.004	47	158.446		47	98.42	47	116.081	47	132.46	47	124.989		0.0102745	0.0109914	0.012062	0.0108362	0.011041		0.00768884	0.0109728	0.011463	0.00957564	0.00992508
48	178.722	48	198.943	48	177.164	48	154.44		48	109.867	48	118.777	48	126.316	48	99.42		0.0101315	0.010744	0.0113666	0.0105622	0.0107011		0.00858311	0.0112276	0.0109313	0.00761675	0.00958971
49	171.384	49	190.454	49	169.378	49	148.786		49	118.953	49	119.139	49	121.208	49	92.554		0.00971554	0.0102855	0.010867	0.0101755	0.0102609		0.00929293	0.0112619	0.0104893	0.00709074	0.00953371
50	164.34	50	188.209	50	168.05	50	144.17		50	124.73	50	123.684	50	112.514	50	92.081		0.00931623	0.0101643	0.0107818	0.00985985	0.0100305		0.00974425	0.0116915	0.00973692	0.0070545	0.00955679
51	158.906	51	189.638	51	168.586	51	141.487		51	118.759	51	137.186	51	109.737	51	92.21		0.00900818	0.0102415	0.0108162	0.00967636	0.00993556		0.00927778	0.0129678	0.0094966	0.00706438	0.00970164
52	158.042	52	181.166	52	167.411	52	143.067		52	121.522	52	163.544	52	123.813	52	103.502		0.0089592	0.00978393	0.0107408	0.00978442	0.0098171		0.00949363	0.0154593	0.0107147	0.00792948	0.0108993
53	154.194	53	176.838	53	163.547	53	150.322		53	129.788	53	176.512	53	137.653	53	127.507		0.00874106	0.00955019	0.0104929	0.0102806	0.00976619		0.0101394	0.0166852	0.0119124	0.00976855	0.0121264
54	143.646	54	171.262	54	153.705	54	160.178		54	134.845	54	163.391	54	137.409	54	154.382		0.00814311	0.00924906	0.00986148	0.0109546	0.00955207		0.0105345	0.0154449	0.0118913	0.0118275	0.0124245
55	143.856	55	164.224	55	149.967	55	163.072		55	134.131	55	153.274	55	128.623	55	165.244		0.00815501	0.00886897	0.00962165	0.0111526	0.00944955		0.0104787	0.0144885	0.011131	0.0126597	0.0121895
56	152.88	56	154.689	56	146.33	56	163.59		56	130.342	56	155.592	56	128.296	56	170.943		0.00866657	0.00835403	0.00938831	0.011188	0.00939923		0.0101827	0.0147077	0.0111027	0.0130963	0.0122723
57	158.792	57	138.724	57	140.478	57	165.73		57	133.303	57	161.676	57	140.913	57	175.56		0.00900172	0.00749183	0.00901285	0.0113344	0.00921019		0.010414	0.0152828	0.0121946	0.01345	0.0128353
58	159.967	58	128.784	58	136.743	58	165.301		58	145.519	58	173.808	58	156.249	58	169.771		0.00906833	0.00695502	0.00877322	0.011305	0.0090254		0.0113683	0.0164296	0.0135217	0.0130065	0.0135815
59	161.586	59	129.171	59	132.716	59	162.902		59	157.027	59	209.356	59	181.123	59	156.016		0.00916011	0.00697592	0.00851486	0.0111409	0.00894796		0.0122674	0.0197898	0.0156743	0.0119527	0.014921
60	161.15	60	128.335	60	129.071	60	165.926		60	169.712	60	237.825	60	209.243	60	135.533		0.00913539	0.00693077	0.008281	0.0113478	0.00892373		0.0132584	0.0224809	0.0181078	0.0103834	0.0160576
61	165.899	61	125.807	61	126.599	61	169.229		61	191.075	61	239.118	61	229.952	61	128.321		0.0094046	0.00679425	0.0081224	0.0115736	0.00897372		0.0149273	0.0226031	0.0199	0.00983091	0.0168153
62	174.195	62	129.298	62	125.671	62	170.995		62	214.294	62	217.955	62	235.653	62	125.93		0.00987489	0.00698278	0.00806286	0.0116944	0.00915374		0.0167412	0.0206026	0.0203933	0.00964773	0.0168462
63	182.556	63	139.469	63	127.126	63	165.068		63	230.963	63	189.596	63	218.274	63	119.881		0.0103489	0.00753207	0.00815621	0.0112891	0.00933156		0.0180435	0.017922	0.0188893	0.00918431	0.0160098
64	189.586	64	146.992	64	125.935	64	154.298		64	241.326	64	164.941	64	195.748	64	115.123		0.0107474	0.00793835	0.0080798	0.0105525	0.00932951		0.018853	0.0155914	0.01694	0.00881979	0.015051
65	193.37	65	150.57	65	125.672	65	146.633		65	249.01	65	142.452	65	191.623	65	111.005		0.0109619	0.00813158	0.00806292	0.0100283	0.00929618		0.0194533	0.0134656	0.016583	0.0085043	0.0145015
66	191.441	66	154.883	66	131.593	66	141.117		66	255	66	142.741	66	191.553	66	111.022		0.0108525	0.00836451	0.00844281	0.00965106	0.00932773		0.0199213	0.0134929	0.0165769	0.0085056	0.0146242
67	181.04	67	158.448	67	138.594	67	137.584		67	254.755	67	168.061	67	176.972	67	121.18		0.0102629	0.00855704	0.00889198	0.00940943	0.00928034		0.0199022	0.0158863	0.0153151	0.00928383	0.0150968
68	172.141	68	162.214	68	143.924	68	132.364		68	253.637	68	184.485	68	160.316	68	130.537		0.00975846	0.00876042	0.00923394	0.00905243	0.00920131		0.0198148	0.0174388	0.0138737	0.0100007	0.015282
69	169.744	69	164.267	69	151.672	69	127.691		69	247.576	69	201.596	69	151.352	69	127.798		0.00962257	0.00887129	0.00973104	0.00873285	0.00923944		0.0193413	0.0190563	0.0130979	0.00979084	0.0153216
70	161.703	70	164.974	70	159.461	70	124.654		70	228.199	70	216.811	70	146.902	70	116.892		0.00916674	0.00890947	0.0102308	0.00852514	0.00920803		0.0178275	0.0204945	0.0127128	0.00895532	0.0149975
71	151.444	71	164.873	71	157.041	71	126.612		71	198.533	71	229.755	71	125.814	71	120.862		0.00858517	0.00890402	0.0100755	0.00865905	0.00905594		0.0155099	0.0217181	0.0108879	0.00925946	0.0143438
72	147.417	72	164.963	72	153.07	72	127.7		72	172.736	72	240.711	72	102.227	72	125.268		0.00835688	0.00890888	0.00982074	0.00873346	0.00895499		0.0134946	0.0227537	0.00884669	0.00959702	0.013673
73	146.71	73	164.809	73	150.586	73	127.617		73	156.111	73	250.221	73	97.617	73	128.496		0.0083168	0.00890056	0.00966137	0.00872778	0.00890163		0.0121958	0.0236527	0.00844774	0.00984432	0.0135351
74	146.925	74	169.482	74	151.579	74	129.549		74	147.608	74	252.88	74	97.81	74	137.44		0.00832899	0.00915293	0.00972508	0.00885992	0.00901673		0.0115315	0.023904	0.00846444	0.0105295	0.0136074
75	147.146	75	177.859	75	154.431	75	129.501		75	137.874	75	251.337	75	110.365	75	136.655		0.00834152	0.00960533	0.00990806	0.00885663	0.00917789		0.0107711	0.0237582	0.00955095	0.0104694	0.0136374
76	149.364	76	183.764	76	157.044	76	127.678		76	127.478	76	233.246	76	115.801	76	136.121		0.00846726	0.00992423	0.0100757	0.00873196	0.00929979		0.00995893	0.0220481	0.0100214	0.0104285	0.0131142
77	152.611	77	186.484	77	161.968	77	125.882		77	136.777	77	198.448	77	114.268	77	139.111		0.00865132	0.0100711	0.0103916	0.00860913	0.0094308		0.0106854	0.0187587	0.00988871	0.0106576	0.0124976
78	154.271	78	193.103	78	164.797	78	125.847		78	166.614	78	161.369	78	106.152	78	135.797		0.00874543	0.0104286	0.0105731	0.00860673	0.00958847		0.0130163	0.0152537	0.00918635	0.0104037	0.011965
79	156.318	79	202.417	79	158.671	79	128.422		79	194.793	79	132.435	79	91.842	79	121.907		0.00886147	0.0109316	0.0101801	0.00878284	0.009689		0.0152178	0.0125187	0.00794797	0.00933952	0.011256
80	166.183	80	208.841	80	146.486	80	133.366		80	205.319	80	103.388	80	78.723	80	102.734		0.0094207	0.0112785	0.00939832	0.00912096	0.00980463		0.0160401	0.00977297	0.00681266	0.00787064	0.0101241
81	179.432	81	209.83	81	135.18	81	138.425		81	201.109	81	87.415	81	73.637	81	76.731		0.0101718	0.0113319	0.00867294	0.00946695	0.0099109		0.0157112	0.00826308	0.00637252	0.00587851	0.00905632
82	183.937	82	208.405	82	128.961	82	142.281		82	174.786	82	62.447	82	74.989	82	38.345		0.0104272	0.011255	0.00827394	0.00973066	0.00992168		0.0136548	0.00590293	0.00648952	0.00293768	0.00724622
83	174.314	83	205.005	83	121.994	83	136.328		83	154.927	83	30.649	83	70.985	83	47.699		0.00988164	0.0110714	0.00782695	0.00932353	0.00952587		0.0121033	0.00289716	0.00614301	0.00365431	0.00619945
84	162.659	84	206.932	84	118.214	84	133.181		84	118.665	84	20.56	84	60.656	84	68.735		0.00922093	0.0111754	0.00758443	0.00910831	0.00927228		0.00927043	0.00194348	0.00524915	0.00526592	0.00543224
85	156.935	85	205.774	85	119.859	85	130.902		85	78.455	85	19.849	85	56.371	85	71.949		0.00889645	0.0111129	0.00768997	0.00895245	0.00916294		0.00612912	0.00187627	0.00487832	0.00551215	0.00459896
86	147.684	86	188.138	86	117.457	86	127.841		86	74.058	86	24.823	86	54.466	86	69.26		0.00837202	0.0101605	0.00753586	0.0087431	0.00870286		0.00578561	0.00234645	0.00471347	0.00530614	0.00453792
87	136.24	87	169.813	87	111.371	87	123.194		87	81.384	87	30.171	87	48.02	87	62.236		0.00772327	0.00917081	0.00714539	0.00842529	0.00811619		0.00635794	0.00285198	0.00415563	0.00476802	0.00453339
88	137.199	88	177.024	88	109.908	88	118.153		88	81.997	88	39.248	88	63.654	88	56.215		0.00777764	0.00956024	0.00705153	0.00808054	0.00811749		0.00640583	0.00371	0.00550859	0.00430674	0.00498279
89	131.371	89	186.776	89	111.874	89	120.073		89	75.527	89	31.526	89	67.02	89	56.786		0.00744726	0.0100869	0.00717766	0.00821185	0.00823092		0.00590037	0.00298006	0.00579989	0.00435048	0.0047577
90	123.171	90	186.242	90	115.353	90	120.822		90	63.278	90	26.956	90	45.625	90	53.768		0.00698241	0.0100581	0.00740087	0.00826307	0.0081761		0.00494345	0.00254807	0.00394837	0.00411927	0.00388979
91	114.607	91	181.916	91	123.389	91	117.952		91	68.665	91	30.368	91	34.897	91	47.545		0.00649693	0.00982443	0.00791645	0.00806679	0.00807615		0.0053643	0.0028706	0.00301997	0.00364251	0.00372434
92	108.226	92	177.275	92	136.915	92	111.927		92	76.61	92	22.585	92	31.847	92	45.438		0.0061352	0.00957379	0.00878426	0.00765474	0.008037		0.00598498	0.00213489	0.00275603	0.00348109	0.00358925
93	103.077	93	172.659	93	144.11	93	104.533		93	56.536	93	11.036	93	27.598	93	47.838		0.0058433	0.00932451	0.00924588	0.00714906	0.00789069		0.00441675	0.0010432	0.00238832	0.00366496	0.00287831
94	99.477	94	166.988	94	146.441	94	98.134		94	32.263	94	20.925	94	31.783	94	46.435		0.00563923	0.00901824	0.00939543	0.00671143	0.00769108		0.00252047	0.00197798	0.00275049	0.00355747	0.0027016
95	98.573	95	155.773	95	144.372	95	90.982		95	30.378	95	35.408	95	36.071	95	31.826		0.00558798	0.00841257	0.00926269	0.0062223	0.00737138		0.00237321	0.00334701	0.00312157	0.00243825	0.00282001
96	98.247	96	140.842	96	139.444	96	84.889		96	28.289	96	34.28	96	32.5	96	16.991		0.0055695	0.00760622	0.00894651	0.0058056	0.00698196		0.00221001	0.00324039	0.00281254	0.00130171	0.00239116
97	95.454	97	129.473	97	140.903	97	81.51		97	11.521	97	27.233	97	26.166	97	14.32		0.00541117	0.00699223	0.00904012	0.00557451	0.00675451		0.000900052	0.00257426	0.0022644	0.00109708	0.00170895
98	93.591	98	120.71	98	145.914	98	78.374		98	13.633	98	20.769	98	20.493	98	10.285		0.00530556	0.00651898	0.00936162	0.00536003	0.00663655		0.00106505	0.00196323	0.00177346	0.000787953	0.00139742
99	94.117	99	110.892	99	147.827	99	72.868		99	39.886	99	22.046	99	16.306	99	7.54		0.00533537	0.00598876	0.00948435	0.00498348	0.00644799		0.003116	0.00208394	0.00141112	0.000577654	0.00179718
100	96.187	100	99.354	100	145.313	100	66.459		100	53.004	100	39.059	100	16.405	100	8.53		0.00545272	0.00536564	0.00932306	0.00454516	0.00617165		0.00414082	0.00369213	0.00141968	0.000653499	0.00247653
101	98.386	101	91.553	101	140.08	101	63.174		101	44.958	101	43.452	101	19.207	101	12.123		0.00557738	0.00494435	0.00898732	0.0043205	0.00595739		0.00351224	0.00410739	0.00166217	0.000928766	0.00255264
102	100.82	102	87.097	102	132.767	102	62.199		102	43.905	102	21.611	102	13.659	102	13.187		0.00571536	0.0047037	0.00851813	0.00425382	0.00579775		0.00342998	0.00204282	0.00118204	0.00101028	0.00191628
103	103.769	103	80.838	103	122.71	103	60.826		103	55.877	103	4.182	103	4.431	103	9.259		0.00588253	0.00436568	0.00787289	0.00415992	0.00557025		0.00436526	0.000395312	0.000383457	0.000709349	0.00146335
104	109.36	104	73.994	104	114.916	104	60.045		104	76.542	104	6.505	104	1.023	104	5.327		0.00619948	0.00399607	0.00737283	0.00410651	0.00541872		0.00597967	0.000614899	8.853e-05	0.000408111	0.0017728
105	115.23	105	71	105	110.95	105	59.59		105	94.23	105	8.54	105	1	105	3.18		0.00653224	0.00383438	0.00711838	0.00407539	0.0053901		0.0073615	0.000807261	8.65396e-05	0.000243626	0.00212473
106	115.36	106	70.18	106	102.26	106	59		106	85.75	106	3.36	106	1	106	1.18		0.00653961	0.00379009	0.00656084	0.00403504	0.0052314		0.00669902	0.000317611	8.65396e-05	9.0402e-05	0.00179839
107	110.95	107	67.77	107	88.67	107	57.36		107	63.21	107	2.64	107	0.59	107	6.97		0.00628962	0.00365994	0.00568893	0.00392288	0.00489034		0.00493814	0.000249551	5.10584e-05	0.000533985	0.00144318
108	105.95	108	67.23	108	78.95	108	53.77		108	45.85	108	7.46	108	0	108	22.33		0.00600617	0.00363078	0.00506531	0.00367735	0.0045949		0.00358193	0.000705172	0	0.00171074	0.00149946
109	99.72	109	71.05	109	73.13	109	54.87		109	33.31	109	14.69	109	0	109	23.44		0.005653	0.00383708	0.00469191	0.00375258	0.00448364		0.00260227	0.0013886	0	0.00179578	0.00144666
110	91.72	110	73.18	110	64.9	110	61.46		110	25.13	110	18.77	110	0	110	9.49		0.00519949	0.00395211	0.00416388	0.00420328	0.00437969		0.00196322	0.00177427	0	0.000727047	0.00111614
111	80.85	111	72	111	57.36	111	66.23		111	26.33	111	11.67	111	0	111	2.18		0.00458328	0.00388838	0.00368013	0.0045295	0.00417032		0.00205697	0.00110313	0	0.000167014	0.000831779
112	67.08	112	73.23	112	56.23	112	67.18		112	37.28	112	4.82	112	0.41	112	0.59		0.00380268	0.00395481	0.00360763	0.00459447	0.0039899		0.00291241	0.000455621	3.54812e-05	4.5201e-05	0.000862179
113	62.46	113	75.82	113	55.54	113	63.13		113	31.75	113	8.87	113	1	113	0		0.00354078	0.00409468	0.00356336	0.00431749	0.00387908		0.0024804	0.000838455	8.65396e-05	0	0.000851348
	17640.2		18516.7		15586.4		14621.9			12800.4		10579		11555.4		13052.8		1	1	1	1	1		1	1	1	1	1

## Sheet: 4E
0	117	0	39	0	88	0	46		0	15	0	3	0	16	0	27		0.00459539	0.00211903	0.00416056	0.00309063	0.0034914		0.000748098	0.000347181	0.000956829	0.00192984	0.000995487
1	114	1	49	1	87	1	43		1	15	1	8	1	29	1	33		0.00447756	0.00266237	0.00411328	0.00288907	0.00353557		0.000748098	0.000925817	0.00173425	0.00235869	0.00144171
2	111	2	62	2	86	2	43		2	19	2	17	2	48	2	36		0.00435973	0.00336871	0.004066	0.00288907	0.00367088		0.000947591	0.00196736	0.00287049	0.00257312	0.00208964
3	125	3	56	3	99	3	46		3	21	3	25	3	48	3	40		0.0049096	0.00304271	0.00468063	0.00309063	0.00393089		0.00104734	0.00289318	0.00287049	0.00285902	0.00241751
4	136	4	52	4	108	4	50		4	16	4	21	4	48	4	52		0.00534165	0.00282537	0.00510614	0.00335938	0.00415813		0.000797972	0.00243027	0.00287049	0.00371672	0.00245386
5	133	5	58	5	105	5	45		5	19	5	14	5	39	5	51		0.00522382	0.00315137	0.0049643	0.00302344	0.00409073		0.000947591	0.00162018	0.00233227	0.00364525	0.00213632
6	131	6	63	6	96	6	47		6	28	6	7	6	29	6	42		0.00514526	0.00342304	0.00453879	0.00315782	0.00406623		0.00139645	0.00081009	0.00173425	0.00300197	0.00173569
7	131	7	69	7	103	7	50		7	8	7	5	7	33	7	32		0.00514526	0.00374905	0.00486974	0.00335938	0.00428086		0.000398986	0.000578636	0.00197346	0.00228721	0.00130957
8	135	8	71	8	107	8	52		8	2	8	15	8	17	8	22		0.00530237	0.00385772	0.00505886	0.00349376	0.00442818		9.97465e-05	0.00173591	0.00101663	0.00157246	0.00110619
9	138	9	71	9	110	9	48		9	2	9	6	9	34	9	19		0.0054202	0.00385772	0.0052007	0.00322501	0.0044259		9.97465e-05	0.000694363	0.00203326	0.00135803	0.00104635
10	139	10	70	10	115	10	53		10	1	10	0	10	48	10	14		0.00545948	0.00380338	0.00543709	0.00356094	0.00456522		4.98732e-05	0	0.00287049	0.00100066	0.000980254
11	148	11	69	11	115	11	53		11	1	11	2	11	46	11	13		0.00581297	0.00374905	0.00543709	0.00356094	0.00464001		4.98732e-05	0.000231454	0.00275088	0.000929181	0.000990348
12	152	12	68	12	114	12	58		12	1	12	5	12	59	12	33		0.00597008	0.00369471	0.00538981	0.00389688	0.00473787		4.98732e-05	0.000578636	0.00352831	0.00235869	0.00162888
13	139.479	13	64.172	13	114.621	13	65.6924		13	0.793	13	7.571	13	65.536	13	29.343		0.0054783	0.00348672	0.00541919	0.00441372	0.00469948		3.95495e-05	0.00087617	0.00391917	0.0020973	0.00173305
14	133.515	14	64.657	14	117.142	14	67.5147		14	1.586	14	4.728	14	67.485	14	34.757		0.00524403	0.00351307	0.00553837	0.00453615	0.00470791		7.90989e-05	0.000547158	0.00403573	0.00248427	0.00178656
15	135.846	15	70.76	15	121.457	15	68.6299		15	4.264	15	0.212	15	60.639	15	46.312		0.00533562	0.00384468	0.00574235	0.00461108	0.00488343		0.000212659	2.45341e-05	0.00362632	0.00331017	0.00179342
16	148.463	16	79.356	16	118.292	16	73.5055		16	9.363	16	0.286	16	58.518	16	38.757		0.00583116	0.00431173	0.00559274	0.00493866	0.00516857		0.000466963	3.3098e-05	0.00349948	0.00277017	0.00169243
17	152.286	17	87.45	17	119.778	17	73.4703		17	11.493	17	1.069	17	63.805	17	31.476		0.00598129	0.00475151	0.00566298	0.0049363	0.00533302		0.000573193	0.000123712	0.00381566	0.00224976	0.00169058
18	154.68	18	96.94	18	127.78	18	73.58		18	13.36	18	4.94	18	71.62	18	37.66		0.00607534	0.00526714	0.00604132	0.00494367	0.00558187		0.000666306	0.000571692	0.00428301	0.00269177	0.00205319
19	158.26	19	103.1	19	133.42	19	73.84		19	23.46	19	10.26	19	85.14	19	59.82		0.00621595	0.00560184	0.00630797	0.00496113	0.00577172		0.00117003	0.00118736	0.00509153	0.00427566	0.00293114
20	161.62	20	107.62	20	135.62	20	77.43		20	48.82	20	12	20	92.57	20	49.32		0.00634792	0.00584743	0.00641199	0.00520234	0.00595242		0.00243481	0.00138873	0.00553586	0.00352517	0.00322114
21	164.43	21	108.81	21	136.81	21	80.43		21	59.48	21	12	21	87.14	21	36.71		0.00645829	0.00591208	0.00646825	0.0054039	0.00606063		0.00296646	0.00138873	0.00521113	0.00262386	0.00304755
22	169.9	22	109	22	136.02	22	82.96		22	52.18	22	17.88	22	72.28	22	49.7		0.00667313	0.00592241	0.0064309	0.00557389	0.00615008		0.00260239	0.0020692	0.00432248	0.00355233	0.0031366
23	178.82	23	111.94	23	139.92	23	88.88		23	29.46	23	14.08	23	50.44	23	57.84		0.00702348	0.00608215	0.00661529	0.00597164	0.00642314		0.00146927	0.00162944	0.0030164	0.00413414	0.00256231
24	178	24	121	24	145	24	88		24	60	24	14	24	49	24	43		0.00699127	0.00657442	0.00685547	0.00591251	0.00658342		0.00299239	0.00162018	0.00293029	0.00307344	0.00265408
25	185	25	117	25	145	25	87		25	57	25	6	25	63	25	48		0.00726621	0.00635708	0.00685547	0.00584532	0.00658102		0.00284277	0.000694363	0.00376752	0.00343082	0.00268387
26	194	26	117	26	146	26	91		26	59	26	1	26	67	26	49		0.0076197	0.00635708	0.00690274	0.00611407	0.0067484		0.00294252	0.000115727	0.00400672	0.0035023	0.00264182
27	194	27	118	27	137	27	97		27	62	27	2	27	73	27	54		0.0076197	0.00641141	0.00647723	0.0065172	0.00675639		0.00309214	0.000231454	0.00436553	0.00385967	0.0028872
28	184	28	118	28	138	28	93		28	52	28	4	28	87	28	35		0.00722693	0.00641141	0.00652451	0.00624845	0.00660283		0.00259341	0.000462908	0.00520276	0.00250164	0.00269018
29	180	29	121	29	137	29	90		29	44	29	7	29	67	29	33		0.00706983	0.00657442	0.00647723	0.00604689	0.00654209		0.00219442	0.00081009	0.00400672	0.00235869	0.00234248
30	187	30	123	30	139	30	92		30	65	30	10	30	95	30	59		0.00734476	0.00668308	0.00657179	0.00618126	0.00669523		0.00324176	0.00115727	0.00568117	0.00421705	0.00357431
31	204	31	125	31	146	31	94		31	84	31	5	31	113	31	55		0.00801247	0.00679175	0.00690274	0.00631564	0.00700565		0.00418935	0.000578636	0.00675761	0.00393115	0.00386419
32	215	32	119	32	148	32	101		32	97	32	1	32	99	32	42		0.00844451	0.00646575	0.0069973	0.00678595	0.00717338		0.0048377	0.000115727	0.00592038	0.00300197	0.00346895
33	223	33	112	33	148	33	110		33	102	33	13	33	83	33	51		0.00875873	0.00608541	0.0069973	0.00739064	0.00730802		0.00508707	0.00150445	0.00496355	0.00364525	0.00380008
34	221.672	34	117.157	34	146.293	34	108.136		34	99.036	34	5.55	34	67.065	34	52		0.00870655	0.00636561	0.00691659	0.0072654	0.00731354		0.00493925	0.000642286	0.00401061	0.00371672	0.00332722
35	221.071	35	120.142	35	144.444	35	114.172		35	82.532	35	1.899	35	66.581	35	63.225		0.00868297	0.0065278	0.00682916	0.00767092	0.00742771		0.00411614	0.000219766	0.00398167	0.00451904	0.00320915
36	216.9	36	119.78	36	146.22	36	123		36	70.78	36	3.1	36	67.64	36	74.32		0.00851914	0.00650813	0.00691315	0.00826408	0.00755112		0.00353003	0.000358754	0.004045	0.00531206	0.00331146
37	211.9	37	119.44	37	147.22	37	123.22		37	72.2	37	9.64	37	77.88	37	77.24		0.00832276	0.00648966	0.00696043	0.00827886	0.00751292		0.00360085	0.00111561	0.00465737	0.00552076	0.00372365
38	206.14	38	120.38	38	149.86	38	122.76		38	86.82	38	19	38	76.66	38	66.66		0.00809652	0.00654073	0.00708524	0.00824795	0.00749261		0.00432999	0.00219882	0.00458441	0.00476455	0.00396944
39	206.24	39	123.1	39	149.14	39	120.76		39	92.24	39	14.04	39	83.3	39	57.8		0.00810045	0.00668852	0.0070512	0.00811358	0.00748844		0.00460031	0.00162481	0.00498149	0.00413128	0.00383447
40	205.16	40	123.16	40	148.92	40	128.28		40	100.36	40	9.16	40	91.76	40	57.68		0.00805803	0.00669178	0.0070408	0.00861883	0.00760236		0.00500528	0.00106006	0.00548742	0.0041227	0.00391886
41	200.4	41	128.52	41	149.92	41	132.68		41	92.72	41	9	41	89.24	41	58.92		0.00787107	0.00698301	0.00708808	0.00891445	0.00771415		0.00462425	0.00104154	0.00533672	0.00421133	0.00380346
42	192	42	136	42	150	42	131		42	79	42	8	42	83	42	72		0.00754115	0.00738943	0.00709186	0.00880158	0.007706		0.00393999	0.000925817	0.00496355	0.00514623	0.0037439
43	182	43	149	43	148	43	133		43	63	43	6	43	59	43	78		0.00714838	0.00809577	0.0069973	0.00893595	0.00779435		0.00314201	0.000694363	0.00352831	0.00557509	0.00323494
44	176	44	149	44	151	44	137		44	60	44	23	44	66	44	84		0.00691272	0.00809577	0.00713914	0.00920471	0.00783808		0.00299239	0.00266172	0.00394692	0.00600394	0.00390124
45	180	45	151	45	153	45	137		45	74	45	43	45	80	45	85		0.00706983	0.00820444	0.0072337	0.00920471	0.00792817		0.00369062	0.00497627	0.00478415	0.00607541	0.00488161
46	193	46	152	46	154	46	136		46	85	46	48	46	92	46	74		0.00758042	0.00825877	0.00728098	0.00913752	0.00806442		0.00423922	0.0055549	0.00550177	0.00528918	0.00514627
47	192	47	161	47	151	47	132		47	91	47	50	47	98	47	59		0.00754115	0.00874778	0.00713914	0.00886877	0.00807421		0.00453846	0.00578636	0.00586058	0.00421705	0.00510061
48	187	48	163	48	152	48	142		48	83	48	40	48	93	48	72		0.00734476	0.00885645	0.00718642	0.00954064	0.00823207		0.00413948	0.00462908	0.00556157	0.00514623	0.00486909
49	182	49	165	49	149	49	141		49	77	49	31	49	84	49	97		0.00714838	0.00896511	0.00704458	0.00947346	0.00815788		0.00384024	0.00358754	0.00502335	0.00693312	0.00484606
50	175	50	172	50	149	50	134		50	74	50	60	50	94	50	82		0.00687344	0.00934545	0.00704458	0.00900314	0.00806665		0.00369062	0.00694363	0.00562137	0.00586099	0.00552915
51	182	51	173	51	151	51	126		51	77	51	72	51	115	51	70		0.00714838	0.00939979	0.00713914	0.00846564	0.00803824		0.00384024	0.00833235	0.00687721	0.00500328	0.00601327
52	189	52	173	52	154	52	119		52	80	52	48	52	109	52	81		0.00742332	0.00939979	0.00728098	0.00799533	0.00802485		0.00398986	0.0055549	0.0065184	0.00578951	0.00546317
53	188	53	172	53	155	53	123		53	84	53	50	53	89	53	91		0.00738404	0.00934545	0.00732826	0.00826408	0.00808046		0.00418935	0.00578636	0.00532236	0.00650427	0.00545058
54	186	54	170	54	155	54	122		54	106	54	79	54	87	54	99		0.00730549	0.00923678	0.00732826	0.00819689	0.00801685		0.00528656	0.00914244	0.00520276	0.00707607	0.00667696
55	189	55	166	55	153	55	112		55	132	55	66	55	90	55	105		0.00742332	0.00901945	0.0072337	0.00752501	0.00780037		0.00658327	0.00763799	0.00538217	0.00750492	0.00677709
56	191	56	164	56	154	56	105		56	128	56	31	56	90	56	109		0.00750187	0.00891078	0.00728098	0.0070547	0.00768708		0.00638377	0.00358754	0.00538217	0.00779082	0.00578608
57	193	57	163	57	158	57	103		57	122	57	50	57	95	57	109		0.00758042	0.00885645	0.00747009	0.00692033	0.00770682		0.00608453	0.00578636	0.00568117	0.00779082	0.00633572
58	199	58	163	58	156	58	105		58	132	58	81	58	127	58	108		0.00781609	0.00885645	0.00737554	0.0070547	0.00777569		0.00658327	0.0093739	0.00759483	0.00771935	0.00781784
59	209	59	163	59	152	59	110		59	138	59	81	59	139	59	99		0.00820885	0.00885645	0.00718642	0.00739064	0.00791059		0.00688251	0.0093739	0.00831246	0.00707607	0.00791123
60	208	60	168	60	158	60	108		60	131	60	85	60	115	60	89		0.00816958	0.00912812	0.00747009	0.00725626	0.00800601		0.00653339	0.00983681	0.00687721	0.00636131	0.00740218
61	206	61	173	61	167	61	104		61	128	61	109	61	109	61	116		0.00809102	0.00939979	0.00789561	0.00698751	0.00809348		0.00638377	0.0126143	0.0065184	0.00829115	0.0084519
62	206	62	172	62	156	62	106		62	128	62	126	62	123	62	137		0.00809102	0.00934545	0.00737554	0.00712189	0.00798347		0.00638377	0.0145816	0.00735563	0.00979214	0.00952829
63	205	63	169	63	146	63	111		63	130	63	133	63	107	63	121		0.00805175	0.00918245	0.00690274	0.00745783	0.00789869		0.00648352	0.0153917	0.0063988	0.00864853	0.00923064
64	192.615	64	161.722	64	159.092	64	112.914		64	127.414	64	133.207	64	93.665	64	120.136		0.00756531	0.00878701	0.00752172	0.00758644	0.00786512		0.00635455	0.0154157	0.00560134	0.00858677	0.00898958
65	191.787	65	156.787	65	160.071	65	115.799		65	115.988	65	132.799	65	93.787	65	128.385		0.00753277	0.00851887	0.00756801	0.00778026	0.00784998		0.0057847	0.0153684	0.00560864	0.00917638	0.00898454
66	196.12	66	156.22	66	157	66	115.34		66	105.24	66	129.88	66	96.34	66	135.78		0.00770297	0.00848806	0.00742281	0.00774942	0.00784082		0.00524866	0.0150306	0.00576131	0.00970494	0.00893639
67	191.68	67	157.22	67	157.44	67	113		67	102.08	67	133.66	67	88.94	67	134.34		0.00752858	0.00854239	0.00744362	0.0075922	0.0077767		0.00509106	0.0154681	0.00531878	0.00960201	0.00886998
68	185.24	68	159.1	68	159.88	68	114.1		68	114.76	68	132.48	68	67.92	68	132.88		0.00727564	0.00864454	0.00755898	0.00766611	0.00778632		0.00572345	0.0153315	0.00406174	0.00949766	0.00865359
69	178.56	69	162.56	69	162.78	69	117.78		69	114.84	69	116.26	69	60.52	69	137.76		0.00701327	0.00883254	0.00769609	0.00791336	0.00786381		0.00572744	0.0134544	0.00361921	0.00984646	0.00816189
70	177.88	70	160.12	70	161.56	70	115.9		70	92.78	70	106.74	70	74.76	70	149.94		0.00698656	0.00869996	0.00763841	0.00778705	0.00777799		0.00462724	0.0123527	0.00447079	0.010717	0.00804194
71	181.44	71	158.32	71	158.9	71	111.56		71	103.66	71	123.74	71	79.68	71	177.82		0.00712638	0.00860216	0.00751264	0.00749545	0.00768416		0.00516986	0.0143201	0.00476501	0.0127098	0.00924118
72	184.86	72	166.1	72	160.58	72	109.38		72	147.48	72	154.36	72	66.32	72	197.04		0.00726071	0.00902488	0.00759207	0.00734898	0.00780666		0.0073553	0.0178636	0.00396606	0.0140835	0.0108171
73	187.86	73	168.62	73	169.58	73	112.72		73	151.48	73	173.68	73	64.72	73	189.66		0.00737854	0.0091618	0.00801759	0.00757339	0.00803283		0.0075548	0.0200995	0.00387038	0.013556	0.0112702
74	189.92	74	173.6	74	173.92	74	108.56		74	177.84	74	179	74	78.96	74	214.6		0.00745945	0.00943239	0.00822278	0.00729389	0.00810213		0.00886946	0.0207152	0.00472195	0.0153386	0.0124113
75	184.48	75	171.24	75	164.8	75	107.08		75	197.48	75	175.32	75	103	75	240.92		0.00724579	0.00930416	0.00779159	0.00719445	0.007884		0.00984897	0.0202893	0.00615959	0.0172199	0.0133794
76	185.986	76	167.008	76	162.898	76	107.219		76	216.731	76	155.955	76	119.842	76	251.207		0.00730494	0.00907422	0.00770164	0.00720378	0.00782115		0.0108091	0.0180482	0.00716677	0.0179551	0.0134948
77	189.095	77	166.329	77	161.51	77	109.115		77	225.349	77	140.23	77	130.274	77	250.865		0.00742706	0.00903732	0.00763604	0.0073312	0.00785791		0.0112389	0.0162284	0.00779063	0.0179307	0.0132972
78	187.55	78	164.7	78	162.1	78	111.15		78	227	78	137.3	78	135.85	78	246.9		0.00736637	0.00894881	0.00766394	0.0074679	0.00786176		0.0113212	0.0158893	0.00812408	0.0176473	0.0132455
79	185	79	162.4	79	157.45	79	112.75		79	227	79	140.65	79	135	79	252.45		0.00726621	0.00882385	0.00744409	0.00757541	0.00777739		0.0113212	0.016277	0.00807325	0.018044	0.0134289
80	186.56	80	156.92	80	161.56	80	115.44		80	232.2	80	162.48	80	139.68	80	255		0.00732748	0.00852609	0.00763841	0.00775614	0.00781203		0.0115806	0.0188033	0.00835312	0.0182262	0.0142408
81	185.4	81	155	81	167.68	81	110.36		81	226.6	81	178.68	81	159.6	81	251.88		0.00728192	0.00842177	0.00792776	0.00741483	0.00776157		0.0113013	0.0206781	0.00954437	0.0180032	0.0148818
82	184.76	82	152.36	82	168.48	82	106.12		82	234.6	82	191.8	82	188.96	82	253.4		0.00725678	0.00827833	0.00796558	0.00712995	0.00765766		0.0117003	0.0221965	0.0113002	0.0181119	0.0158272
83	186.76	83	148.48	83	167.12	83	103.36		83	251.08	83	171	83	206.84	83	254.88		0.00733534	0.00806752	0.00790128	0.00694451	0.00756216		0.0125222	0.0197893	0.0123694	0.0182177	0.0157246
84	180.705	84	140.553	84	170.631	84	100.656		84	254.287	84	160.144	84	223.201	84	254.541		0.00709752	0.00763681	0.00806729	0.0067628	0.00739111		0.0126821	0.018533	0.0133478	0.0181934	0.0156891
85	180.316	85	131.212	85	175.768	85	97.229		85	255	85	160.717	85	236.415	85	253.124		0.00708223	0.00712928	0.00831016	0.00653259	0.00726356		0.0127177	0.0185993	0.0141381	0.0180922	0.0158868
86	185.56	86	118.45	86	176.78	86	92.11		86	255	86	158.13	86	246.67	86	248.45		0.0072882	0.00643586	0.00835799	0.00618865	0.00706768		0.0127177	0.0182999	0.0147513	0.0177581	0.0158817
87	181.12	87	113.56	87	174.67	87	93.11		87	255	87	140.25	87	243.34	87	244.66		0.00711382	0.00617017	0.00825824	0.00625584	0.00694952		0.0127177	0.0162307	0.0145522	0.0174872	0.0152469
88	177.15	88	110	88	175.15	88	98.5		88	255	88	117.55	88	243.85	88	248.65		0.00695789	0.00597674	0.00828093	0.00661798	0.00695839		0.0127177	0.0136037	0.0145827	0.0177724	0.0146691
89	185.5	89	109.55	89	171.8	89	107.15		89	255	89	117	89	246.5	89	248.35		0.00728585	0.00595229	0.00812254	0.00719915	0.00713996		0.0127177	0.0135401	0.0147412	0.0177509	0.0146875
90	191	90	107.34	90	166.32	90	98.55		90	255	90	94.59	90	244.32	90	254.15		0.00750187	0.00583221	0.00786346	0.00662134	0.00695472		0.0127177	0.0109466	0.0146108	0.0181655	0.0141101
91	191.83	91	105.34	91	170.32	91	86.87		91	255	91	65.1	91	241.68	91	253.34		0.00753447	0.00572355	0.00805257	0.00583659	0.00678679		0.0127177	0.00753384	0.0144529	0.0181076	0.013203
92	185.36	92	102.51	92	177.64	92	89.15		92	255	92	44.23	92	235.19	92	251.34		0.00728035	0.00556978	0.00839865	0.00598978	0.00680964		0.0127177	0.00511861	0.0140648	0.0179646	0.0124664
93	180.68	93	97.85	93	180.66	93	90.83		93	255	93	31.87	93	234.83	93	245.19		0.00709653	0.00531658	0.00854144	0.00610265	0.0067643		0.0127177	0.00368822	0.0140433	0.0175251	0.0119936
94	192.87	94	96.01	94	182.98	94	92.98		94	255	94	32.97	94	242.92	94	221.23		0.00757532	0.00521661	0.00865112	0.00624711	0.00692254		0.0127177	0.00381552	0.0145271	0.0158125	0.0117182
95	203.89	95	95.01	95	182.01	95	95.97		95	255	95	49.83	95	241.02	95	180.41		0.00800815	0.00516228	0.00860526	0.006448	0.00705592		0.0127177	0.00576668	0.0144134	0.0128949	0.0114482
96	198	96	86	96	170	96	79		96	255	96	49	96	255	96	183		0.00777681	0.00467273	0.00803744	0.00530782	0.0064487		0.0127177	0.00567063	0.0152495	0.01308	0.0116794
97	189	97	80	97	167	97	73		97	255	97	52	97	255	97	189		0.00742332	0.00434672	0.00789561	0.0049047	0.00614259		0.0127177	0.00601781	0.0152495	0.0135089	0.0118735
98	196	98	82	98	171	98	86		98	255	98	68	98	254	98	154		0.00769825	0.00445539	0.00808472	0.00577814	0.00650413		0.0127177	0.00786944	0.0151897	0.0110072	0.011696
99	200	99	83	99	173	99	95		99	255	99	68	99	254	99	113		0.00785536	0.00450972	0.00817928	0.00638282	0.0067318		0.0127177	0.00786944	0.0151897	0.00807673	0.0109634
100	187	100	83	100	175	100	90		100	255	100	53	100	254	100	105		0.00734476	0.00450972	0.00827384	0.00604689	0.0065438		0.0127177	0.00613354	0.0151897	0.00750492	0.0103865
101	177	101	88	101	176	101	88		101	255	101	39	101	255	101	92		0.006952	0.00478139	0.00832112	0.00591251	0.00649175		0.0127177	0.00451336	0.0152495	0.00657574	0.00976406
102	181	102	96	102	175	102	93		102	255	102	42	102	255	102	78		0.0071091	0.00521607	0.00827384	0.00624845	0.00671186		0.0127177	0.00486054	0.0152495	0.00557509	0.00960069
103	191	103	107	103	176	103	88		103	255	103	53	103	255	103	69		0.00750187	0.00581374	0.00832112	0.00591251	0.00688731		0.0127177	0.00613354	0.0152495	0.00493181	0.00975812
104	176	104	102	104	176	104	85		104	255	104	65	104	255	104	45		0.00691272	0.00554207	0.00832112	0.00571095	0.00662171		0.0127177	0.00752226	0.0152495	0.0032164	0.00967645
105	170	105	105	105	170	105	91		105	255	105	77	105	255	105	23		0.00667706	0.00570507	0.00803744	0.00611407	0.00663341		0.0127177	0.00891099	0.0152495	0.00164394	0.00963052
106	173	106	104	106	164	106	98		106	255	106	79	106	255	106	47		0.00679489	0.00565074	0.00775377	0.00658439	0.00669595		0.0127177	0.00914244	0.0152495	0.00335935	0.0101172
107	174	107	103	107	159	107	106		107	255	107	77	107	255	107	68		0.00683416	0.0055964	0.00751737	0.00712189	0.00676746		0.0127177	0.00891099	0.0152495	0.00486033	0.0104346
108	169	108	105	108	159	108	119		108	255	108	69	108	255	108	53		0.00663778	0.00570507	0.00751737	0.00799533	0.00696389		0.0127177	0.00798517	0.0152495	0.0037882	0.00993513
109	168	109	104	109	152	109	109		109	255	109	65	109	255	109	42		0.0065985	0.00565074	0.00718642	0.00732345	0.00668978		0.0127177	0.00752226	0.0152495	0.00300197	0.00962284
110	162	110	120	110	152	110	119		110	255	110	80	110	255	110	39		0.00636284	0.00652008	0.00718642	0.00799533	0.00701617		0.0127177	0.00925817	0.0152495	0.00278754	0.0100032
111	154	111	136	111	150	111	117		111	255	111	100	111	249	111	35		0.00604863	0.00738943	0.00709186	0.00786095	0.00709772		0.0127177	0.0115727	0.0148907	0.00250164	0.0104207
112	148	112	131	112	145	112	111		112	255	112	85	112	227	112	55		0.00581297	0.00711776	0.00685547	0.00745783	0.006811		0.0127177	0.00983681	0.013575	0.00393115	0.0100152
113	152	113	123	113	148	113	110		113	255	113	89	113	200	113	62		0.00597008	0.00668308	0.0069973	0.00739064	0.00676028		0.0127177	0.0102997	0.0119604	0.00443148	0.00985231
114	147	114	136	114	148	114	110		114	255	114	81	114	194	114	61		0.00577369	0.00738943	0.0069973	0.00739064	0.00688777		0.0127177	0.0093739	0.0116016	0.00436	0.00951328
115	142	115	148	115	149	115	119		115	255	115	77	115	181	115	52		0.00557731	0.00804144	0.00704458	0.00799533	0.00716466		0.0127177	0.00891099	0.0108241	0.00371672	0.00904238
116	142	116	147	116	150	116	122		116	248	116	70	116	162	116	61		0.00557731	0.0079871	0.00709186	0.00819689	0.00721329		0.0123686	0.0081009	0.0096879	0.00436	0.00862934
117	146	117	143	117	141	117	123		117	241	117	62	117	145	117	69		0.00573441	0.00776977	0.00666635	0.00826408	0.00710865		0.0120194	0.00717508	0.00867127	0.00493181	0.0081994
118	146	118	144	118	141	118	122		118	223	118	60	118	126	118	75		0.00573441	0.0078241	0.00666635	0.00819689	0.00710544		0.0111217	0.00694363	0.00753503	0.00536066	0.00774026
119	145	119	148	119	137	119	123		119	218	119	59	119	111	119	66		0.00569514	0.00804144	0.00647723	0.00826408	0.00711947		0.0108724	0.0068279	0.006638	0.00471738	0.00726391
120	150	120	138	120	131	120	123		120	213	120	26	120	111	120	87		0.00589152	0.00749809	0.00619356	0.00826408	0.00696181		0.010623	0.00300891	0.006638	0.00621836	0.00662207
121	157	121	127	121	126	121	124		121	201	121	28	121	112	121	77		0.00616646	0.00690042	0.00595716	0.00833127	0.00683883		0.0100245	0.00324036	0.00669781	0.00550361	0.00636657
122	152	122	137	122	125	122	126		122	187	122	25	122	95	122	79		0.00597008	0.00744376	0.00590988	0.00846564	0.00694734		0.00932629	0.00289318	0.00568117	0.00564656	0.0058868
123	149	123	138	123	127	123	126		123	172	123	31	123	79	123	73		0.00585224	0.00749809	0.00600444	0.00846564	0.00695511		0.0085782	0.00358754	0.00472435	0.00521771	0.00552695
124	154	124	135	124	126	124	121		124	153	124	23	124	61	124	83		0.00604863	0.00733509	0.00595716	0.0081297	0.00686765		0.0076306	0.00266172	0.00364791	0.00593246	0.00496818
125	162	125	132	125	127	125	114		125	148	125	27	125	53	125	72		0.00636284	0.00717209	0.00600444	0.00765939	0.00679969		0.00738124	0.00312463	0.0031695	0.00514623	0.0047054
126	163	126	129	126	121	126	116		126	141	126	22	126	21	126	65		0.00640212	0.00700909	0.00572077	0.00779376	0.00673144		0.00703213	0.002546	0.00125584	0.0046459	0.00386997
127	158	127	122	127	126	127	119		127	145	127	35	127	35	127	65		0.00620574	0.00662875	0.00595716	0.00799533	0.00669674		0.00723162	0.00405045	0.00209306	0.0046459	0.00450526
128	151	128	114	128	130	128	118		128	145	128	56	128	53	128	66		0.0059308	0.00619408	0.00614628	0.00792814	0.00654982		0.00723162	0.00648072	0.0031695	0.00471738	0.0053998
129	148	129	107	129	125	129	118		129	112	129	53	129	33	129	67		0.00581297	0.00581374	0.00590988	0.00792814	0.00636618		0.0055858	0.00613354	0.00197346	0.00478886	0.00462041
130	149	130	107	130	125	130	109		130	132	130	49	130	44	130	67		0.00585224	0.00581374	0.00590988	0.00732345	0.00622483		0.00658327	0.00567063	0.00263128	0.00478886	0.00491851
131	150	131	108	131	125	131	100		131	149	131	35	131	38	131	65		0.00589152	0.00586807	0.00590988	0.00671876	0.00609706		0.00743111	0.00405045	0.00227247	0.0046459	0.00459998
132	146	132	100	132	117	132	94		132	135	132	27	132	38	132	73		0.00573441	0.0054334	0.00553165	0.00631564	0.00575378		0.00673289	0.00312463	0.00227247	0.00521771	0.00433692
133	140	133	98	133	114	133	91		133	130	133	43	133	50	133	60		0.00549875	0.00532473	0.00538981	0.00611407	0.00558184		0.00648352	0.00497627	0.00299009	0.00428853	0.0046846
134	142	134	95	134	108	134	87		134	135	134	39	134	44	134	62		0.00557731	0.00516173	0.00510614	0.00584532	0.00542263		0.00673289	0.00451336	0.00263128	0.00443148	0.00457725
135	143	135	94	135	103	135	84		135	147	135	29	135	52	135	48		0.00561658	0.0051074	0.00486974	0.00564376	0.00530937		0.00733137	0.00335609	0.0031097	0.00343082	0.00430699
136	140	136	86	136	100	136	89		136	136	136	35	136	63	136	45		0.00549875	0.00467273	0.00472791	0.0059797	0.00521977		0.00678276	0.00405045	0.00376752	0.0032164	0.00445428
137	132	137	85	137	93	137	92		137	125	137	23	137	69	137	27		0.00518454	0.00461839	0.00439695	0.00618126	0.00509529		0.00623415	0.00266172	0.00412633	0.00192984	0.00373801
138	125	138	86	138	90	138	93		138	118	138	19	138	61	138	13		0.0049096	0.00467273	0.00425512	0.00624845	0.00502147		0.00588504	0.00219882	0.00364791	0.000929181	0.00316524
139	122	139	89	139	90	139	91		139	114	139	28	139	38	139	2		0.00479177	0.00483573	0.00425512	0.00611407	0.00499917		0.00568555	0.00324036	0.00227247	0.000142951	0.00283533
140	121	140	92	140	90	140	86		140	92	140	34	140	27	140	5		0.00475249	0.00499873	0.00425512	0.00577814	0.00494612		0.00458834	0.00393472	0.00161465	0.000357377	0.00262377
141	123	141	96	141	92	141	85		141	66	141	36	141	20	141	10		0.00483105	0.00521607	0.00434967	0.00571095	0.00502693		0.00329163	0.00416618	0.00119604	0.000714754	0.00234215
142	122	142	107	142	95	142	87		142	72	142	45	142	32	142	29		0.00479177	0.00581374	0.00449151	0.00584532	0.00523559		0.00359087	0.00520772	0.00191366	0.00207279	0.00319626
143	122	143	126	143	98	143	88		143	78	143	55	143	21	143	24		0.00479177	0.00684609	0.00463335	0.00591251	0.00554593		0.00389011	0.00636499	0.00125584	0.00171541	0.00330659
144	120	144	120	144	86	144	86		144	78	144	59	144	33	144	17		0.00471322	0.00652008	0.004066	0.00577814	0.00526936		0.00389011	0.0068279	0.00197346	0.00121508	0.00347664
145	120	145	110	145	76	145	78		145	74	145	64	145	46	145	15		0.00471322	0.00597674	0.00359321	0.00524064	0.00488095		0.00369062	0.00740654	0.00275088	0.00107213	0.00373004
146	110	146	130	146	78	146	70		146	49	146	58	146	36	146	31		0.00432045	0.00706342	0.00368777	0.00470313	0.00494369		0.00244379	0.00671217	0.00215287	0.00221574	0.00338114
147	99	147	149	147	78	147	71		147	36	147	51	147	26	147	33		0.0038884	0.00809577	0.00368777	0.00477032	0.00511057		0.00179544	0.00590208	0.00155485	0.00235869	0.00290276
148	111	148	145	148	78	148	71		148	46	148	47	148	13	148	12		0.00435973	0.00787843	0.00368777	0.00477032	0.00517406		0.00229417	0.00543917	0.000777424	0.000857705	0.00234212
149	119	149	144	149	76	149	66		149	40	149	48	149	5	149	2		0.00467394	0.0078241	0.00359321	0.00443438	0.00513141		0.00199493	0.0055549	0.000299009	0.000142951	0.00199795
150	107	150	152	150	75	150	59		150	18	150	63	150	2	150	2		0.00420262	0.00825877	0.00354593	0.00396407	0.00499285		0.000897718	0.00729081	0.000119604	0.000142951	0.00211277
	25460.3		18404.7		21151		14883.7			20050.8		8641.02		16721.9		13990.8		1	1	1	1	1		1	1	1	1	1
