# Supplementary material for: Glial insulin regulates cooperative or antagonistic Golden goal/Flamingo interactions during photoreceptor axon guidance
Source: eLife. 2021 Mar 5;10:e66718. doi: 10.7554/eLife.66718 (PMC7987344; doi:10.7554/eLife.66718)
Supplement: Figure 5—figure supplement 1—source data 1. [file elife-66718-fig5-figsupp1-data1.xlsx]

## Sheet: Sheet1
WT	Normal	Abnormal		gogo-	Normal	Abnormal		hts-	Normal	Abnormal
1	56	2		1	24	28		1	29	39
	40	2			30	20			32	28
2	48	0		2	16	28		2	30	39
	50	0			22	24			45	19
3	48	0		3	20	20		3	32	29
	46	0			20	26			43	17
4	42	2		4	26	24
	40	2			24	28
5	46	1		5	26	22
	40	0			20	22
計	456	9			228	242			211	171
		WT (n=5, 465 axons)				gogo LOF (n=5, 470)						hts LOF (n=3, 382)
		0.0193548				0.514894						0.447644
