# Supplementary material for: Glial insulin regulates cooperative or antagonistic Golden goal/Flamingo interactions during photoreceptor axon guidance
Source: eLife. 2021 Mar 5;10:e66718. doi: 10.7554/eLife.66718 (PMC7987344; doi:10.7554/eLife.66718)
Supplement: Figure 5—figure supplement 1—source data 2. [file elife-66718-fig5-figsupp1-data2.xlsx]

## Sheet: Counts
Item	Source	Numbers	ND.T	ND.Z	ND.M	Comment
1	25do adult002.nd2	32	0	0	0	M3
2	25do adult002.nd2	32	0	0	0	M3
3	25do adult002.nd2	30	0	0	0	M3
4	25do adult002.nd2	28	0	0	0	M3
5	25do adult002.nd2	1	0	0	0	M3
Feature	Mean	St.Dev	Minimum	Maximum
Numbers	24.6	11.89	1	32
Item	Source	Numbers	ND.T	ND.Z	ND.M	Comment
1	25do adult002.nd2	18	0	0	0	M3
2	25do adult002.nd2	21	0	0	0	M3
3	25do adult002.nd2	23	0	0	0	M3
4	25do adult002.nd2	24	0	0	0	M3
5	25do adult002.nd2	21	0	0	0	M3
Feature	Mean	St.Dev	Minimum	Maximum
Numbers	21.4	2.06	18	24
Item	Source	Numbers	ND.T	ND.Z	ND.M	Comment		M1	0
1	25do adult.nd2	23	0	0	0	M3		M3	288
2	25do adult.nd2	20	0	0	0	M3		M1/R8	0/288
3	25do adult.nd2	24	0	0	0	M3
4	25do adult.nd2	23	0	0	0	M3
Feature	Mean	St.Dev	Minimum	Maximum					WT (n=3, 301 axons)	0	0	0
Numbers	22.5	1.5	20	24					U-Hts (n=3, 288)	0	0	0
									U-Gogo(WT) (n=3, 302)	0.3	0.003311	0.003311
									U-GogoFFD (n=3, 317)	0	0	0
									U-GogoDDD (n=3, 314)	13.4	0.133758	0.133758
									U-Gogo(WT) U-Hts (n=3, 342)	18.1	0.181287	0.181287
									U-GogoFFD U-Hts (n=3, 349)	1.7	0.017192	0.017192
									U-GogoDDD U-Hts (n=3, 310)	42.3	0.422581	0.422581
									U-GogoΔYYD (n=3, 346)	17.3	0.1734	0.17341
									U-GogoΔC (n=3, 256)	0	0
									WT (n=301)	0	0	0
									U-Gogo(WT) (n=302)	0.3	0.003311	0.003311
									U-GogoFFD (n=317)	0	0	0
									U-GogoDDD (n=314)	13.4	0.133758	0.133758
									U-GogoΔYYD (n=346)	17.3	0.1734	0.17341
									U-GogoΔC (n=256)	0	0
