# Supplementary material for: Glial insulin regulates cooperative or antagonistic Golden goal/Flamingo interactions during photoreceptor axon guidance
Source: eLife. 2021 Mar 5;10:e66718. doi: 10.7554/eLife.66718 (PMC7987344; doi:10.7554/eLife.66718)
Supplement: Figure 5—figure supplement 1—source data 3. [file elife-66718-fig5-figsupp1-data3.xlsx]

## Sheet: Abnormal rate
fmi-	Normal	Abnormal		fmi- rescue	Normal	Abnormal		fmiΔC rescue	Normal	Abnormal
1	0	26		1	22	6		1	3	31
	1	30			13	10			6	36
2	0	39		2	20	11		2	1	36
	1	27			28	7			0	26
3	0	46		3	34	2		3	3	35
								4
								5
計	2	168			117	36			13	164
		fmi- (n=3, 170 axons)				fmi- +Fmi (n=3, 153)				fmi- +FmiΔC (n=3, 177)
		0.988235				0.235294				0.926554

## Sheet: Sheet1
WT	1	75	34.517	13.392	68.333	-93.865	74.169	gogo-	1	77	35.774	16.084	63.559	105.167	75.807	fmi-	1	56	46.024	24.121	67.121	84.806	68.227
	2	62	40.509	23.333	59.082	-100.389	61		2	69	28.163	6.667	57.367	55.146	68.242		2	49	49.073	25.319	87.51	165.379	61.539
	3	77	44.9	20.417	116.314	-88.12	76.208		3	80	32.943	14.593	60.08	68.6	79.48		3	54	83.903	30.333	140.821	-168.056	65.151
	4	69	28.314	4	54	90	68		4	90	52.489	37.734	74.079	89.356	79.006		4	61	63.29	20.333	128.28	-11.497	64.208
	5	60	28.221	6.063	60.528	-109.983	58.523		5	72	23.404	8.667	64.1	122.347	71.021		5	55	23.031	6	55.947	-53.973	68.406
	6	64	33.37	9	64.667	90	73		6	72	33.605	4	74.871	107.928	71.47		6	53	25.788	7.375	71.907	130.365	66.498
	7	72	19.973	1.742	40.089	85.17	71.253		7	75	23.995	5.196	67.495	100.098	74.148		7	58	59.553	22.245	116.742	111.615	61.009
	8	69	36.96	9.667	64.449	66.468	67.624		8	70	14.525	1.889	41.107	114.765	68.83		8	51	67.29	31.173	98.12	88.854	64.01
	9	70	34.336	23.92	52.344	81.634	59.731		9	73	48.112	18	67.015	132.166	71.505		9	59	85.611	36.471	148.137	105.945	62.241
	10	69	42.56	9.275	72.647	83.29	68.469		10	81	57.609	18.903	103.516	123.294	70.156		10	54	77.071	31.033	146.078	117.051	66.773
	11	68	29.421	8.772	67.966	81.384	69.753		11	71	55.302	20.752	105.451	137.891	70.093		11	63	15.932	5.333	39.51	146.821	66.129
	12	72	58.933	22.955	91.467	75.475	71.106		12	80	40.044	12.333	73.592	136.548	78.518		12	42	91.315	24.667	147.862	171.674	65.437
	13	63	26.203	5.929	48.3	131.1	62.37		13	90	61.539	11	114.246	128.157	79.022		13	69	60.009	28.263	99.062	163.706	71.72
	14	69	21.149	4.667	39.336	132.614	67.941		14	69	47.876	14.461	84.602	116.94	67.425		14	48	65.721	4.667	121.821	135	60.669
	15	67	27.133	8.376	48.424	136.848	65.795		15	79	64.711	23.667	95.581	120.203	77.524		15	52	37.102	19.067	73.821	141.34	65.225
	16	69	24.002	11.259	36.062	136.193	67.897		16	69	48.585	18.6	77.255	145.84	67.676		16	54	65.706	26.096	136.653	-54.211	57.009
	17	62	13.942	3.365	25.199	117.408	70.828		17	65	29.153	15.667	71.924	153.034	63.953		17	43	72.64	28	148.333	109.29	56.379
	18	65	37.027	17.092	76.86	101.659	64.327		18	72	30.941	7.727	78.829	149.452	70.831		18	50	56.926	28.667	104.216	-55.008	62.826
	19	60	29.189	13.068	57.533	100.739	59.034		19	73	51.709	22.333	143.964	135	72.125		19	49	39.831	21	63.914	170.34	65.676
	20	70	47.726	9.667	88.169	103.264	69.008		20	77	36.325	14.767	102.833	146.206	76.41		20	54	45.944	18.252	81.623	176.548	66.595
Average							67.3018								72.6621								64.2863
							m2
