# Supplementary material for: Glial insulin regulates cooperative or antagonistic Golden goal/Flamingo interactions during photoreceptor axon guidance
Source: eLife. 2021 Mar 5;10:e66718. doi: 10.7554/eLife.66718 (PMC7987344; doi:10.7554/eLife.66718)
Supplement: Figure 5—source data 1. [file elife-66718-fig5-data1.xlsx]

## Sheet: Counts
Item	Source	Numbers	ND.T	ND.Z	ND.M	Comment
1	22do L3.nd2	6	0	0	0	1
2	22do L3.nd2	89	0	0	0	1
3	22do L3.nd2	2	0	0	0	1
4	22do L3.nd2	94	0	0	0	1
5	22do L3.nd2	1	0	0	0	1
6	22do L3.nd2	86	0	0	0	1
7	22do L3001.nd2	0	0	0	0	1
8	22do L3001.nd2	79	N/A	28	1	1
9	22do L3001.nd2	2	0	0	0	1
10	22do L3001.nd2	71	0	0	0	1
Feature	Mean	St.Dev	Minimum	Maximum
Numbers	43	41.2189	0	94

## Sheet: Taxonomy
gogo-
Class	Taxonomy
F1	103
F2	3
F1	55
F2	0
F1	70
F2	2
F1	55
F2	1
F1	62		345					WT (n=5, 407 axons)	0.02457	0.97543
F2	3		9	354	0.0254237288135593			gogo- (n=5, 354)	0.9746	0.0254
U-gogoDDD								gogo- +Gogo (n=5, 490)	0.043	0.957
F1	80							gogo- +GogoΔC (n=5, 430)	0.97442	0.02558
F2	6							gogo- +GogoFFD (n=5, 391)	0.2021	0.7979
F1	107							gogo- +GogoDDD (n=5, 449)	0.96882	0.03118
F2	5
F1	96
F2	1
F1	83
F2	2
F1	69		435
F2	0		14	449	0.0311804008908686
U-gogoFL
F1	78
F2	10
F1	79
F2	9
F1	82
F2	0
F1	112
F2	2
F1	118		21
F2	0		469	490	0.957142857142857
U-gogoFFD
F1	91
F2	10
F1	81
F2	13
F1	20
F2	19
F1	72
F2	15
F1	48		79
F2	22		312	391	0.797953964194373
U-gogoΔC
F1	6
F2	89
F1	2
F2	94
F1	1
F2	86
F1	0
F2	79
F1	2		419
F2	71		11	430	0.0255813953488372
Control
	22	24	25	71
	0	0	3	3
	30	23	31	84
	0	1	0	1
	28	28	29	85
	0	2	1	3
	24	27	21	72
	1	0	1	2
	30	27	28	85		10
	0	0	1	1		397	407	0.975429975429975
