# Supplementary material for: Glial insulin regulates cooperative or antagonistic Golden goal/Flamingo interactions during photoreceptor axon guidance
Source: eLife. 2021 Mar 5;10:e66718. doi: 10.7554/eLife.66718 (PMC7987344; doi:10.7554/eLife.66718)
Supplement: Figure 5—source data 2. [file elife-66718-fig5-data2.xlsx]

## Sheet: Sheet1
		+Fmi +GogoDDD (n=4, 580)	+Fmi +GogoFFD (n=4, 572)	+Fmi +GogoΔC (n=4, 572)	+Fmi +Gogo (n=4, 513)	+Fmi (n=4, 570)	WT (n=4, 360 axons)
	~5	346	181	153	265	139	360
	5~15	191	246	311	182	248	0
	15~	43	145	108	66	183	0
		580	572	572	513	570	360
		0.596552	0.316434	0.267483	0.516569	0.24386
	χ2	182.75	9.93357	27.1119	113.718
	p	2.07206e-40	0.00696549	1.29636e-06	2.02494e-25

## Sheet: WT
Item	Source	Length xyz	Length xy	Height	ND.T	ND.Z	ND.M	Comment
1	29do p24h.nd2	0	0	0	0	0	0
2	29do p24h.nd2	0	0	0	0	0	0
3	29do p24h.nd2	0.4377	0.214	0.3818	0	0	0
4	29do p24h.nd2	0.1326	0.1326	0	0	0	0
5	29do p24h.nd2	0.0956	0.0956	0.0005	0	0	0
6	29do p24h.nd2	0	0	0	0	0	0
7	29do p24h.nd2	0	0	0	0	0	0
8	29do p24h.nd2	0	0	0	0	0	0
9	29do p24h.nd2	0.4164	0.1543	0.3867	0	0	0
10	29do p24h.nd2	0	0	0	0	0	0
11	29do p24h.nd2	0	0	0	0	0	0
12	29do p24h.nd2	0.1304	0.1304	0	0	0	0
13	29do p24h.nd2	0	0	0	0	0	0
14	29do p24h.nd2	0	0	0	0	0	0
15	29do p24h.nd2	0.2438	0.2437	0.0049	0	0	0
16	29do p24h.nd2	0	0	0	0	0	0
17	29do p24h.nd2	0	0	0	0	0	0
18	29do p24h.nd2	0	0	0	0	0	0
19	29do p24h.nd2	0	0	0	0	0	0
20	29do p24h.nd2	0.056	0.056	0.0004	0	0	0
21	29do p24h.nd2	0.1167	0.1167	0.0005	0	0	0
22	29do p24h.nd2	0.7691	0.0224	0.7688	0	0	0
23	29do p24h.nd2	0	0	0	0	0	0
24	29do p24h.nd2	0	0	0	0	0	0
25	29do p24h.nd2	0.4831	0.3033	0.376	0	0	0
26	29do p24h.nd2	0	0	0	0	0	0
27	29do p24h.nd2	0	0	0	0	0	0
28	29do p24h.nd2	0	0	0	0	0	0
29	29do p24h.nd2	0	0	0	0	0	0
30	29do p24h.nd2	0	0	0	0	0	0
31	29do p24h.nd2	0	0	0	0	0	0
32	29do p24h.nd2	0	0	0	0	0	0
33	29do p24h.nd2	0	0	0	0	0	0
34	29do p24h.nd2	0.102	0.102	0.0003	0	0	0
35	29do p24h.nd2	0	0	0	0	0	0
36	29do p24h.nd2	0	0	0	0	0	0
37	29do p24h.nd2	0	0	0	0	0	0
38	29do p24h.nd2	0	0	0	0	0	0
39	29do p24h.nd2	0	0	0	0	0	0
40	29do p24h.nd2	0	0	0	0	0	0
41	29do p24h.nd2	0	0	0	0	0	0
42	29do p24h.nd2	0	0	0	0	0	0
43	29do p24h.nd2	0	0	0	0	0	0
44	29do p24h.nd2	0	0	0	0	0	0
45	29do p24h.nd2	0	0	0	0	0	0
46	29do p24h.nd2	0	0	0	0	0	0
47	29do p24h.nd2	0	0	0	0	0	0
48	29do p24h.nd2	0	0	0	0	0	0
49	29do p24h.nd2	0	0	0	0	0	0
50	29do p24h.nd2	0	0	0	0	0	0
51	29do p24h.nd2	0	0	0	0	0	0
52	29do p24h.nd2	0	0	0	0	0	0
53	29do p24h.nd2	0	0	0	0	0	0
54	29do p24h.nd2	0	0	0	0	0	0
55	29do p24h.nd2	0	0	0	0	0	0
56	29do p24h.nd2	0	0	0	0	0	0
57	29do p24h.nd2	0.4656	0.4656	0.0013	0	0	0
58	29do p24h.nd2	0	0	0	0	0	0
59	29do p24h.nd2	0	0	0	0	0	0
60	29do p24h.nd2	0	0	0	0	0	0
61	29do p24h.nd2	0	0	0	0	0	0
62	29do p24h.nd2	4.275	0.2824	4.2657	0	0	0
63	29do p24h.nd2	0	0	0	0	0	0
64	29do p24h.nd2	0	0	0	0	0	0
65	29do p24h.nd2	0.082	0.082	0	0	0	0
66	29do p24h.nd2	0.082	0.082	0	0	0	0
67	29do p24h.nd2	0	0	0	0	0	0
68	29do p24h.nd2	0	0	0	0	0	0
69	29do p24h.nd2	0	0	0	0	0	0
70	29do p24h.nd2	0.1144	0.1144	0	0	0	0
71	29do p24h.nd2	0.081	0.081	0	0	0	0
72	29do p24h.nd2	0	0	0	0	0	0
73	29do p24h.nd2	0.392	0.1093	0.3765	0	0	0
74	29do p24h.nd2	1.7652	1.7652	0	0	0	0
75	29do p24h.nd2	0	0	0	0	0	0
76	29do p24h.nd2	0	0	0	0	0	0
77	29do p24h.nd2	0.0767	0.0767	0	0	0	0
78	29do p24h.nd2	0	0	0	0	0	0
79	29do p24h.nd2	0.0868	0.0868	0.0003	0	0	0
80	29do p24h.nd2	0	0	0	0	0	0
81	29do p24h.nd2	0	0	0	0	0	0
82	29do p24h.nd2	0	0	0	0	0	0
83	29do p24h.nd2	0.3801	0.0413	0.3779	0	0	0
84	29do p24h.nd2	0	0	0	0	0	0
85	29do p24h.nd2	0	0	0	0	0	0
86	29do p24h.nd2	0	0	0	0	0	0
87	29do p24h.nd2	0	0	0	0	0	0
88	29do p24h.nd2	0	0	0	0	0	0
89	29do p24h.nd2	0	0	0	0	0	0
90	29do p24h.nd2	0	0	0	0	0	0
91	29do p24h.nd2	0	0	0	0	0	0
92	29do p24h.nd2	0	0	0	0	0	0
93	29do p24h.nd2	0	0	0	0	0	0
94	29do p24h.nd2	0.0696	0.0696	4e-05	0	0	0
95	29do p24h.nd2	0	0	0	0	0	0
96	29do p24h.nd2	0	0	0	0	0	0
97	29do p24h.nd2	0	0	0	0	0	0
98	29do p24h.nd2	0	0	0	0	0	0
99	29do p24h.nd2	2.4383	2.4383	0.0017	0	0	0
100	29do p24h.nd2	0	0	0	0	0	0
101	29do p24h.nd2	0	0	0	0	0	0
102	29do p24h.nd2	0	0	0	0	0	0
103	29do p24h.nd2	0	0	0	0	0	0
104	29do p24h.nd2	0.0668	0.0636	0.0205	0	0	0
105	29do p24h.nd2	0	0	0	0	0	0
106	29do p24h.nd2	0	0	0	0	0	0
107	29do p24h.nd2	0	0	0	0	0	0
108	29do p24h.nd2	0	0	0	0	0	0
109	29do p24h.nd2	0	0	0	0	0	0
110	29do p24h.nd2	0	0	0	0	0	0
111	29do p24h.nd2	0	0	0	0	0	0
112	29do p24h.nd2	0	0	0	0	0	0
113	29do p24h.nd2	0	0	0	0	0	0
114	29do p24h.nd2	0	0	0	0	0	0
115	29do p24h.nd2	0	0	0	0	0	0
116	29do p24h.nd2	0	0	0	0	0	0
117	29do p24h.nd2	0	0	0	0	0	0
118	29do p24h.nd2	0	0	0	0	0	0
119	29do p24h.nd2	0	0	0	0	0	0
120	29do p24h.nd2	0	0	0	0	0	0
121	29do p24h.nd2	0	0	0	0	0	0
122	29do p24h.nd2	0	0	0	0	0	0
123	29do p24h.nd2	0.064	0.064	0	0	0	0
124	29do p24h.nd2	0	0	0	0	0	0
125	29do p24h.nd2	0	0	0	0	0	0
126	29do p24h.nd2	0	0	0	0	0	0
127	29do p24h.nd2	0	0	0	0	0	0
128	29do p24h.nd2	0	0	0	0	0	0
129	29do p24h.nd2	0	0	0	0	0	0
130	29do p24h.nd2	0.0709	0.0709	4e-05	0	0	0
131	29do p24h.nd2	0	0	0	0	0	0
132	29do p24h.nd2	0	0	0	0	0	0
133	29do p24h.nd2	0	0	0	0	0	0
134	29do p24h.nd2	0	0	0	0	0	0
135	29do p24h.nd2	0.0715	0.0715	2e-05	0	0	0
136	29do p24h.nd2	0	0	0	0	0	0
137	29do p24h.nd2	0	0	0	0	0	0
138	29do p24h.nd2	0	0	0	0	0	0
139	29do p24h.nd2	0	0	0	0	0	0
140	29do p24h.nd2	0.0749	0.0749	4e-05	0	0	0
141	29do p24h.nd2	0	0	0	0	0	0
142	29do p24h.nd2	0	0	0	0	0	0
143	29do p24h.nd2	0	0	0	0	0	0
144	29do p24h.nd2	0	0	0	0	0	0
145	29do p24h.nd2	0	0	0	0	0	0
146	29do p24h.nd2	0	0	0	0	0	0
147	29do p24h.nd2	0.0642	0.0642	3e-05	0	0	0
148	29do p24h.nd2	0	0	0	0	0	0
149	29do p24h.nd2	0	0	0	0	0	0
150	29do p24h.nd2	0	0	0	0	0	0
151	29do p24h.nd2	0	0	0	0	0	0
152	29do p24h.nd2	0	0	0	0	0	0
153	29do p24h.nd2	0	0	0	0	0	0
154	29do p24h.nd2	0	0	0	0	0	0
155	29do p24h.nd2	0	0	0	0	0	0
156	29do p24h.nd2	0	0	0	0	0	0
157	29do p24h.nd2	0	0	0	0	0	0
158	29do p24h.nd2	0	0	0	0	0	0
159	29do p24h.nd2	0	0	0	0	0	0
160	29do p24h.nd2	0	0	0	0	0	0
161	29do p24h.nd2	0	0	0	0	0	0
162	29do p24h.nd2	0	0	0	0	0	0
163	29do p24h.nd2	0.0972	0.0972	0.0003	0	0	0
164	29do p24h.nd2	0	0	0	0	0	0
165	29do p24h.nd2	0	0	0	0	0	0
166	29do p24h.nd2	0	0	0	0	0	0
167	29do p24h.nd2	0	0	0	0	0	0
168	29do p24h.nd2	0	0	0	0	0	0
169	29do p24h.nd2	0	0	0	0	0	0
170	29do p24h.nd2	0	0	0	0	0	0
171	29do p24h.nd2	0	0	0	0	0	0
172	29do p24h.nd2	0	0	0	0	0	0
173	29do p24h.nd2	0	0	0	0	0	0
174	29do p24h.nd2	0	0	0	0	0	0
175	29do p24h.nd2	0	0	0	0	0	0
176	29do p24h.nd2	0	0	0	0	0	0
177	29do p24h.nd2	0	0	0	0	0	0
178	29do p24h.nd2	0	0	0	0	0	0
179	29do p24h.nd2	0	0	0	0	0	0
180	29do p24h.nd2	0	0	0	0	0	0
181	29do p24h.nd2	0	0	0	0	0	0
182	29do p24h.nd2	0	0	0	0	0	0
183	29do p24h.nd2	0	0	0	0	0	0
184	29do p24h.nd2	0	0	0	0	0	0
185	29do p24h.nd2	0.1535	0.1535	0	0	0	0
186	29do p24h.nd2	0	0	0	0	0	0
187	29do p24h.nd2	0	0	0	0	0	0
188	29do p24h.nd2	0	0	0	0	0	0
189	29do p24h.nd2	0	0	0	0	0	0
190	29do p24h.nd2	0	0	0	0	0	0
191	29do p24h.nd2	0.0748	0.0748	0.0001	0	0	0
192	29do p24h.nd2	0	0	0	0	0	0
193	29do p24h.nd2	0.1627	0.1627	0	0	0	0
194	29do p24h.nd2	0	0	0	0	0	0
195	29do p24h.nd2	0	0	0	0	0	0
196	29do p24h.nd2	0.1058	0.1058	0	0	0	0
197	29do p24h.nd2	0.0754	0.0754	1e-05	0	0	0
198	29do p24h.nd2	0	0	0	0	0	0
199	29do p24h.nd2	0	0	0	0	0	0
200	29do p24h.nd2	0	0	0	0	0	0
201	29do p24h.nd2	1.1226	1.1226	0	0	0	0
202	29do p24h.nd2	0	0	0	0	0	0
203	29do p24h.nd2	0	0	0	0	0	0
204	29do p24h.nd2	0	0	0	0	0	0
205	29do p24h.nd2	0	0	0	0	0	0
206	29do p24h.nd2	0	0	0	0	0	0
207	29do p24h.nd2	0	0	0	0	0	0
208	29do p24h.nd2	0	0	0	0	0	0
209	29do p24h.nd2	0	0	0	0	0	0
210	29do p24h.nd2	0	0	0	0	0	0
211	29do p24h.nd2	1.2467	1.2467	0.0007	0	0	0
212	29do p24h.nd2	0.5599	0.5599	0.0002	0	0	0
213	29do p24h.nd2	0.3968	0.3968	0.0001	0	0	0
214	29do p24h.nd2	0	0	0	0	0	0
215	29do p24h.nd2	0	0	0	0	0	0
216	29do p24h.nd2	0	0	0	0	0	0
217	29do p24h.nd2	0.0658	0.0658	4e-05	0	0	0
218	29do p24h.nd2	0	0	0	0	0	0
219	29do p24h.nd2	0.0689	0.0689	4e-05	0	0	0
220	29do p24h.nd2	0	0	0	0	0	0
221	29do p24h.nd2	0	0	0	0	0	0
222	29do p24h.nd2	0	0	0	0	0	0
223	29do p24h.nd2	0	0	0	0	0	0
224	29do p24h.nd2	0	0	0	0	0	0
225	29do p24h.nd2	0.3737	0.0048	0.3736	0	0	0
226	29do p24h.nd2	0	0	0	0	0	0
227	29do p24h.nd2	0	0	0	0	0	0
228	29do p24h.nd2	0	0	0	0	0	0
229	29do p24h.nd2	0	0	0	0	0	0
230	29do p24h.nd2	0	0	0	0	0	0
231	29do p24h.nd2	0	0	0	0	0	0
232	29do p24h.nd2	0	0	0	0	0	0
233	29do p24h.nd2	0.4425	0.2172	0.3855	0	0	0
234	29do p24h.nd2	0	0	0	0	0	0
235	29do p24h.nd2	0	0	0	0	0	0
236	29do p24h.nd2	0	0	0	0	0	0
237	29do p24h.nd2	0	0	0	0	0	0
238	29do p24h.nd2	0	0	0	0	0	0
239	29do p24h.nd2	0	0	0	0	0	0
240	29do p24h.nd2	0	0	0	0	0	0
241	29do p24h001.nd2	0	0	0	0	0	0
242	29do p24h001.nd2	0	0	0	0	0	0
243	29do p24h001.nd2	0	0	0	0	0	0
244	29do p24h001.nd2	2.5658	1.9468	1.6713	0	0	0
245	29do p24h001.nd2	0	0	0	0	0	0
246	29do p24h001.nd2	0	0	0	0	0	0
247	29do p24h001.nd2	0	0	0	0	0	0
248	29do p24h001.nd2	0	0	0	0	0	0
249	29do p24h001.nd2	0.0954	0.0954	0	0	0	0
250	29do p24h001.nd2	0	0	0	0	0	0
251	29do p24h001.nd2	0	0	0	0	0	0
252	29do p24h001.nd2	0	0	0	0	0	0
253	29do p24h001.nd2	0.0535	0.0535	0	0	0	0
254	29do p24h001.nd2	0	0	0	0	0	0
255	29do p24h001.nd2	0	0	0	0	0	0
256	29do p24h001.nd2	0.0537	0.0537	0	0	0	0
257	29do p24h001.nd2	0	0	0	0	0	0
258	29do p24h001.nd2	0	0	0	0	0	0
259	29do p24h001.nd2	0	0	0	0	0	0
260	29do p24h001.nd2	0	0	0	0	0	0
261	29do p24h001.nd2	0	0	0	0	0	0
262	29do p24h001.nd2	0	0	0	0	0	0
263	29do p24h001.nd2	0	0	0	0	0	0
264	29do p24h001.nd2	0.1	0.1	0.0003	0	0	0
265	29do p24h001.nd2	0	0	0	0	0	0
266	29do p24h001.nd2	0	0	0	0	0	0
267	29do p24h001.nd2	0	0	0	0	0	0
268	29do p24h001.nd2	0	0	0	0	0	0
269	29do p24h001.nd2	0	0	0	0	0	0
270	29do p24h001.nd2	0	0	0	0	0	0
271	29do p24h001.nd2	2.9867	2.6828	1.3126	0	0	0
272	29do p24h001.nd2	0	0	0	0	0	0
273	29do p24h001.nd2	0	0	0	0	0	0
274	29do p24h001.nd2	0	0	0	0	0	0
275	29do p24h001.nd2	0	0	0	0	0	0
276	29do p24h001.nd2	0	0	0	0	0	0
277	29do p24h001.nd2	0	0	0	0	0	0
278	29do p24h001.nd2	0	0	0	0	0	0
279	29do p24h001.nd2	0	0	0	0	0	0
280	29do p24h001.nd2	0.0686	0.0686	0	0	0	0
281	29do p24h001.nd2	0	0	0	0	0	0
282	29do p24h001.nd2	0	0	0	0	0	0
283	29do p24h001.nd2	0.0674	0.0674	2e-05	0	0	0
284	29do p24h001.nd2	0	0	0	0	0	0
285	29do p24h001.nd2	1.1273	1.1273	0	0	0	0
286	29do p24h001.nd2	0	0	0	0	0	0
287	29do p24h001.nd2	0	0	0	0	0	0
288	29do p24h001.nd2	0.9635	0.1343	0.9541	0	0	0
289	29do p24h001.nd2	0	0	0	0	0	0
290	29do p24h001.nd2	0.1338	0.1338	0.0012	0	0	0
291	29do p24h001.nd2	0	0	0	0	0	0
292	29do p24h001.nd2	0	0	0	0	0	0
293	29do p24h001.nd2	0	0	0	0	0	0
294	29do p24h001.nd2	0	0	0	0	0	0
295	29do p24h001.nd2	0	0	0	0	0	0
296	29do p24h001.nd2	0	0	0	0	0	0
297	29do p24h001.nd2	0	0	0	0	0	0
298	29do p24h001.nd2	0	0	0	0	0	0
299	29do p24h001.nd2	0	0	0	0	0	0
300	29do p24h001.nd2	0	0	0	0	0	0
301	29do p24h001.nd2	0	0	0	0	0	0
302	29do p24h001.nd2	4.3196	4.2715	0.6428	0	0	0
303	29do p24h001.nd2	0	0	0	0	0	0
304	29do p24h001.nd2	0	0	0	0	0	0
305	29do p24h001.nd2	0.494	0.494	0	0	0	0
306	29do p24h001.nd2	0.0842	0.0842	0	0	0	0
307	29do p24h001.nd2	0	0	0	0	0	0
308	29do p24h001.nd2	0	0	0	0	0	0
309	29do p24h001.nd2	0.6817	0.6817	0	0	0	0
310	29do p24h001.nd2	0	0	0	0	0	0
311	29do p24h001.nd2	1.6565	1.6565	0	0	0	0
312	29do p24h001.nd2	0	0	0	0	0	0
313	29do p24h001.nd2	0	0	0	0	0	0
314	29do p24h001.nd2	0	0	0	0	0	0
315	29do p24h001.nd2	0	0	0	0	0	0
316	29do p24h001.nd2	0	0	0	0	0	0
317	29do p24h001.nd2	0	0	0	0	0	0
318	29do p24h001.nd2	0	0	0	0	0	0
319	29do p24h001.nd2	1.8663	0.9744	1.5917	0	0	0
320	29do p24h001.nd2	0	0	0	0	0	0
321	29do p24h001.nd2	0	0	0	0	0	0
322	29do p24h001.nd2	0	0	0	0	0	0
323	29do p24h001.nd2	0	0	0	0	0	0
324	29do p24h001.nd2	0	0	0	0	0	0
325	29do p24h001.nd2	0	0	0	0	0	0
326	29do p24h001.nd2	0	0	0	0	0	0
327	29do p24h001.nd2	0	0	0	0	0	0
328	29do p24h001.nd2	0	0	0	0	0	0
329	29do p24h001.nd2	0	0	0	0	0	0
330	29do p24h001.nd2	0.0619	0.0619	0.0001	0	0	0
331	29do p24h001.nd2	1.8799	1.8799	0.0009	0	0	0
332	29do p24h001.nd2	0	0	0	0	0	0
333	29do p24h001.nd2	0.7362	0.6574	0.3314	0	0	0
334	29do p24h001.nd2	0	0	0	0	0	0
335	29do p24h001.nd2	0	0	0	0	0	0
336	29do p24h001.nd2	0	0	0	0	0	0
337	29do p24h001.nd2	0	0	0	0	0	0
338	29do p24h001.nd2	0	0	0	0	0	0
339	29do p24h001.nd2	2.3238	2.3238	0.0006	0	0	0
340	29do p24h001.nd2	0	0	0	0	0	0
341	29do p24h001.nd2	0	0	0	0	0	0
342	29do p24h001.nd2	0	0	0	0	0	0
343	29do p24h001.nd2	0	0	0	0	0	0
344	29do p24h001.nd2	1.5323	1.5323	0.0018	0	0	0
345	29do p24h001.nd2	0	0	0	0	0	0
346	29do p24h001.nd2	0	0	0	0	0	0
347	29do p24h001.nd2	3.755	2.7783	2.526	0	0	0
348	29do p24h001.nd2	2.6527	2.6527	0.0026	0	0	0
349	29do p24h001.nd2	0	0	0	0	0	0
350	29do p24h001.nd2	0	0	0	0	0	0
351	29do p24h001.nd2	0	0	0	0	0	0
352	29do p24h001.nd2	0	0	0	0	0	0
353	29do p24h001.nd2	0	0	0	0	0	0
354	29do p24h001.nd2	0	0	0	0	0	0
355	29do p24h001.nd2	0	0	0	0	0	0
356	29do p24h001.nd2	0.0549	0.0549	0.0006	0	0	0
357	29do p24h001.nd2	0	0	0	0	0	0
358	29do p24h001.nd2	0	0	0	0	0	0
359	29do p24h001.nd2	1.7908	1.4859	0.9995	0	0	0
360	29do p24h001.nd2	0	0	0	0	0	0
Feature	Mean	St.Dev	Minimum	Maximum
Length xyz	0.141	0.5409	0	4.3196
Length xy	0.1113	0.4484	0	4.2715
Height	0.0493	0.3108	0	4.2657

## Sheet: Fmi
Item	Source	Length xyz	Length xy	Height	ND.T	ND.Z	ND.M	Comment
1	25do p24h.nd2	35.44	35.26	3.61	0	0	0
2	25do p24h.nd2	2.82	1.76	2.21	0	0	0
3	25do p24h.nd2	10.63	8.76	6.01	0	0	0
4	25do p24h.nd2	18.81	17.21	7.6	0	0	0
5	25do p24h.nd2	8.04	8.01	0.76	0	0	0				length	sample1	sample2	sample3	sample4	total
6	25do p24h.nd2	1.61	0.48	1.54	0	0	0				5	45	31	32	31	139
7	25do p24h.nd2	1.62	0.47	1.55	0	0	0				15	74	45	73	56	248
8	25do p24h.nd2	40.84	40.83	0.82	0	0	0				25	13	32	23	30	98
9	25do p24h.nd2	4.02	3.94	0.79	0	0	0				25~	20	22	18	25	85
10	25do p24h.nd2	9.85	8.63	4.75	0	0	0
11	25do p24h.nd2	19.99	19.42	4.75	0	0	0
12	25do p24h.nd2	9.21	9.21	0	0	0	0
13	25do p24h.nd2	0	0	0	0	0	0
14	25do p24h.nd2	8.92	8.92	0	0	0	0
15	25do p24h.nd2	7.16	6.43	3.15	0	0	0
16	25do p24h.nd2	1e-05	1e-05	0	0	0	0
17	25do p24h.nd2	0.83	0.26	0.79	0	0	0
18	25do p24h.nd2	3.8	2.13	3.15	0	0	0
19	25do p24h.nd2	9.92	9.41	3.15	0	0	0
20	25do p24h.nd2	32.55	32.33	3.76	0	0	0
21	25do p24h.nd2	31.12	31.04	2.24	0	0	0
22	25do p24h.nd2	8.44	8.34	1.31	0	0	0
23	25do p24h.nd2	18.92	18.8	2.12	0	0	0
24	25do p24h.nd2	12.78	12.7	1.41	0	0	0
25	25do p24h.nd2	32.88	32.58	4.4	0	0	0
26	25do p24h.nd2	11.52	11.51	0.64	0	0	0
27	25do p24h.nd2	13.64	13.47	2.16	0	0	0
28	25do p24h.nd2	17.31	16.31	5.78	0	0	0
29	25do p24h.nd2	10.85	10.46	2.88	0	0	0
30	25do p24h.nd2	0	0	0	0	0	0
31	25do p24h.nd2	5.48	5.29	1.42	0	0	0
32	25do p24h.nd2	15.59	15.51	1.52	0	0	0
33	25do p24h.nd2	11.66	11.26	3.04	0	0	0
34	25do p24h.nd2	0	0	0	0	0	0
35	25do p24h.nd2	10.61	10.36	2.29	0	0	0
36	25do p24h.nd2	0	0	0	0	0	0
37	25do p24h.nd2	1.44	1.44	0.003	0	0	0
38	25do p24h.nd2	8.16	8	1.57	0	0	0
39	25do p24h.nd2	6.36	5.93	2.32	0	0	0
40	25do p24h.nd2	0.33	0.33	0.0005	0	0	0
41	25do p24h.nd2	1.91	1.91	0.02	0	0	0
42	25do p24h.nd2	12.97	9.63	8.69	0	0	0
43	25do p24h.nd2	12.64	12.62	0.75	0	0	0
44	25do p24h.nd2	11.28	11.28	0	0	0	0
45	25do p24h.nd2	2.9	2.9	0	0	0	0
46	25do p24h.nd2	0	0	0	0	0	0
47	25do p24h.nd2	0.37	0.37	0	0	0	0
48	25do p24h.nd2	7.87	7.36	2.79	0	0	0
49	25do p24h.nd2	9.41	9.41	0.04	0	0	0
50	25do p24h.nd2	0	0	0	0	0	0
51	25do p24h.nd2	6.45	6.42	0.68	0	0	0
52	25do p24h.nd2	6.58	6.58	0	0	0	0
53	25do p24h.nd2	9.68	8.98	3.64	0	0	0
54	25do p24h.nd2	20.11	20.1	0.68	0	0	0
55	25do p24h.nd2	1.89	1.89	0.02	0	0	0
56	25do p24h.nd2	0	0	0	0	0	0
57	25do p24h.nd2	5.38	5.33	0.71	0	0	0
58	25do p24h.nd2	0	0	0	0	0	0
59	25do p24h.nd2	1.06	0.8	0.69	0	0	0
60	25do p24h.nd2	10.87	10.34	3.35	0	0	0
61	25do p24h.nd2	44.41	44.09	5.32	0	0	0
62	25do p24h.nd2	5.76	5.76	0	0	0	0
63	25do p24h.nd2	12.49	11.36	5.19	0	0	0
64	25do p24h.nd2	37.66	37.27	5.46	0	0	0
65	25do p24h.nd2	34.3	34.28	1.21	0	0	0
66	25do p24h.nd2	4.37	4.32	0.64	0	0	0
67	25do p24h.nd2	4	2.46	3.16	0	0	0
68	25do p24h.nd2	17.21	17.14	1.59	0	0	0
69	25do p24h.nd2	13.99	13.99	0.01	0	0	0
70	25do p24h.nd2	12.07	11.42	3.91	0	0	0
71	25do p24h.nd2	2.37	1.78	1.56	0	0	0
72	25do p24h.nd2	19.88	19.75	2.3	0	0	0
73	25do p24h.nd2	14.4	13.88	3.85	0	0	0
74	25do p24h.nd2	9.44	9.44	0.002	0	0	0
75	25do p24h.nd2	6.73	6.73	0	0	0	0
76	25do p24h.nd2	15.63	15.62	0.72	0	0	0
77	25do p24h.nd2	0	0	0	0	0	0
78	25do p24h.nd2	8.06	4.89	6.41	0	0	0
79	25do p24h.nd2	9.62	9.62	0	0	0	0
80	25do p24h.nd2	8.73	8.42	2.29	0	0	0
81	25do p24h.nd2	0.1	0.1	0	0	0	0
82	25do p24h.nd2	5.06	5.01	0.72	0	0	0
83	25do p24h.nd2	5.42	4.62	2.83	0	0	0
84	25do p24h.nd2	3	0.93	2.86	0	0	0
85	25do p24h.nd2	18.79	18.75	1.36	0	0	0
86	25do p24h.nd2	6.92	5.94	3.55	0	0	0
87	25do p24h.nd2	6.29	6.29	1e-05	0	0	0
88	25do p24h.nd2	33.86	33.84	1.22	0	0	0
89	25do p24h.nd2	28.89	28.89	0.52	0	0	0
90	25do p24h.nd2	12.98	12.07	4.76	0	0	0
91	25do p24h.nd2	6.22	6.22	0.003	0	0	0
92	25do p24h.nd2	0	0	0	0	0	0
93	25do p24h.nd2	20.62	20.48	2.37	0	0	0
94	25do p24h.nd2	14.26	13.7	3.96	0	0	0
95	25do p24h.nd2	25.06	23.79	7.86	0	0	0
96	25do p24h.nd2	38.85	38.78	2.35	0	0	0
97	25do p24h.nd2	10.19	10.16	0.75	0	0	0
98	25do p24h.nd2	11.87	11.85	0.76	0	0	0
99	25do p24h.nd2	8.11	5.29	6.15	0	0	0
100	25do p24h.nd2	26.25	25.98	3.76	0	0	0
101	25do p24h.nd2	11.1	11.07	0.78	0	0	0
102	25do p24h.nd2	14.85	14.77	1.55	0	0	0
103	25do p24h.nd2	6.69	6.69	0	0	0	0
104	25do p24h.nd2	7.55	7.55	0.004	0	0	0
105	25do p24h.nd2	1.27	1	0.78	0	0	0
106	25do p24h.nd2	0	0	0	0	0	0
107	25do p24h.nd2	1.16	1.16	0.0006	0	0	0
108	25do p24h.nd2	5.45	5.39	0.77	0	0	0
109	25do p24h.nd2	7.25	7.25	0	0	0	0
110	25do p24h.nd2	32.53	32.53	0	0	0	0
111	25do p24h.nd2	5.23	5.23	0.01	0	0	0
112	25do p24h.nd2	0	0	0	0	0	0
113	25do p24h.nd2	10.69	10.2	3.17	0	0	0
114	25do p24h.nd2	27.45	27.44	0.79	0	0	0
115	25do p24h.nd2	11.93	11.91	0.79	0	0	0
116	25do p24h.nd2	5.82	5.32	2.38	0	0	0
117	25do p24h.nd2	0	0	0	0	0	0
118	25do p24h.nd2	6.79	2.44	6.33	0	0	0
119	25do p24h.nd2	1.85	0.97	1.58	0	0	0
120	25do p24h.nd2	10.74	9.66	4.69	0	0	0
121	25do p24h.nd2	0	0	0	0	0	0
122	25do p24h.nd2	11.76	11.73	0.77	0	0	0
123	25do p24h.nd2	6.54	6.35	1.56	0	0	0
124	25do p24h.nd2	32.2	32.12	2.31	0	0	0
125	25do p24h.nd2	39.74	39.58	3.55	0	0	0
126	25do p24h.nd2	13.5	11.94	6.3	0	0	0
127	25do p24h.nd2	10.73	6.38	8.63	0	0	0
128	25do p24h.nd2	0	0	0	0	0	0
129	25do p24h.nd2	7.11	6.94	1.56	0	0	0
130	25do p24h.nd2	0	0	0	0	0	0
131	25do p24h.nd2	0.76	0.76	0	0	0	0
132	25do p24h.nd2	5.29	2.5	4.66	0	0	0
133	25do p24h.nd2	12.09	12.09	1e-05	0	0	0
134	25do p24h.nd2	0	0	0	0	0	0
135	25do p24h.nd2	3.08	2.75	1.37	0	0	0
136	25do p24h.nd2	18.18	18.17	0.7	0	0	0
137	25do p24h.nd2	9.75	9.73	0.68	0	0	0
138	25do p24h.nd2	2.98	2.64	1.38	0	0	0
139	25do p24h.nd2	0	0	0	0	0	0
140	25do p24h.nd2	7.98	6.93	3.97	0	0	0
141	25do p24h.nd2	33.79	33.79	0.01	0	0	0
142	25do p24h.nd2	41.45	41.44	0.74	0	0	0
143	25do p24h.nd2	7.68	7.31	2.37	0	0	0
144	25do p24h.nd2	8.13	7.49	3.16	0	0	0
145	25do p24h.nd2	6.52	6.52	0.0004	0	0	0
146	25do p24h.nd2	6.15	6.1	0.79	0	0	0
147	25do p24h.nd2	34.5	34.5	0.41	0	0	0
148	25do p24h.nd2	8.46	8.46	0.001	0	0	0
149	25do p24h.nd2	0	0	0	0	0	0
150	25do p24h.nd2	2.98	2.87	0.77	0	0	0
151	25do p24h.nd2	7.97	7.93	0.77	0	0	0
152	25do p24h.nd2	19.88	19.88	0.01	0	0	0
Feature	Mean	St.Dev	Minimum	Maximum
Length xyz	10.89	10.65	0	44.41
Length xy	10.49	10.72	0	44.09
Height	1.74	2.03	0	8.69
Item	Source	Length xyz	Length xy	Height	ND.T	ND.Z	ND.M
1	25do p24h002.nd2	37.73	37.73	0.05	0	0	0
2	25do p24h002.nd2	20.36	20.36	0.03	0	0	0
3	25do p24h002.nd2	32.79	32.78	0.94	0	0	0
4	25do p24h002.nd2	12.57	12.27	2.74	0	0	0
5	25do p24h002.nd2	13.41	12.61	4.56	0	0	0
6	25do p24h002.nd2	27.19	27.14	1.75	0	0	0
7	25do p24h002.nd2	16.77	16.67	1.86	0	0	0
8	25do p24h002.nd2	15.19	15.17	0.86	0	0	0
9	25do p24h002.nd2	23.54	23.47	1.84	0	0	0
10	25do p24h002.nd2	12.65	12.61	0.92	0	0	0
11	25do p24h002.nd2	17.22	17.2	0.82	0	0	0
12	25do p24h002.nd2	16.59	16.2	3.59	0	0	0
13	25do p24h002.nd2	8.98	8.58	2.67	0	0	0
14	25do p24h002.nd2	7.75	7.7	0.9	0	0	0
15	25do p24h002.nd2	34.63	34.63	0.1	0	0	0
16	25do p24h002.nd2	11.96	11.82	1.79	0	0	0
17	25do p24h002.nd2	0	0	0	0	0	0
18	25do p24h002.nd2	2.12	1.93	0.88	0	0	0
19	25do p24h002.nd2	4.75	4.01	2.55	0	0	0
20	25do p24h002.nd2	60.71	60.61	3.4	0	0	0
21	25do p24h002.nd2	9.1	5.91	6.92	0	0	0
22	25do p24h002.nd2	13.76	10.53	8.85	0	0	0
23	25do p24h002.nd2	30.32	30.1	3.64	0	0	0
24	25do p24h002.nd2	7.26	4.92	5.34	0	0	0
25	25do p24h002.nd2	11.8	11.66	1.8	0	0	0
26	25do p24h002.nd2	20.11	20.1	0.64	0	0	0
27	25do p24h002.nd2	18.69	18.59	1.97	0	0	0
28	25do p24h002.nd2	19.72	19.7	0.79	0	0	0
29	25do p24h002.nd2	3.96	2.69	2.91	0	0	0
30	25do p24h002.nd2	3.59	3.53	0.61	0	0	0
31	25do p24h002.nd2	6.59	5.16	4.1	0	0	0
32	25do p24h002.nd2	1.78	1.11	1.39	0	0	0
33	25do p24h002.nd2	28.23	28.1	2.71	0	0	0
34	25do p24h002.nd2	32.2	32	3.63	0	0	0
35	25do p24h002.nd2	17.08	16.2	5.4	0	0	0
36	25do p24h002.nd2	7.29	7.29	0	0	0	0
37	25do p24h002.nd2	10.59	9.61	4.45	0	0	0
38	25do p24h002.nd2	10.04	9.66	2.73	0	0	0
39	25do p24h002.nd2	20.42	20.1	3.6	0	0	0
40	25do p24h002.nd2	11.17	10.57	3.59	0	0	0
41	25do p24h002.nd2	16.98	16.88	1.81	0	0	0
42	25do p24h002.nd2	20.5	20.42	1.82	0	0	0
43	25do p24h002.nd2	14.96	14.51	3.65	0	0	0
44	25do p24h002.nd2	19.29	18.21	6.36	0	0	0
45	25do p24h002.nd2	12.05	10.76	5.42	0	0	0
46	25do p24h002.nd2	9.27	9.22	0.95	0	0	0
47	25do p24h002.nd2	25.09	25.08	0.78	0	0	0
48	25do p24h002.nd2	10.37	10.21	1.81	0	0	0
49	25do p24h002.nd2	0	0	0	0	0	0
50	25do p24h002.nd2	13.07	11.44	6.33	0	0	0
51	25do p24h002.nd2	9.44	8.28	4.53	0	0	0
52	25do p24h002.nd2	1.36	0.1	1.35	0	0	0
53	25do p24h002.nd2	14.02	14.02	0.02	0	0	0
54	25do p24h002.nd2	24.78	23.94	6.39	0	0	0
55	25do p24h002.nd2	13.95	12.86	5.4	0	0	0
56	25do p24h002.nd2	13.83	13.71	1.81	0	0	0
57	25do p24h002.nd2	8.86	8.67	1.83	0	0	0
58	25do p24h002.nd2	10.28	6.61	7.88	0	0	0
59	25do p24h002.nd2	16.96	16.96	0.03	0	0	0
60	25do p24h002.nd2	11.45	11.45	0	0	0	0
61	25do p24h002.nd2	3.15	3.02	0.89	0	0	0
62	25do p24h002.nd2	0	0	0	0	0	0
63	25do p24h002.nd2	4.55	4.22	1.7	0	0	0
64	25do p24h002.nd2	15.75	15.73	0.84	0	0	0
65	25do p24h002.nd2	40.11	39.96	3.57	0	0	0
66	25do p24h002.nd2	36.51	36.34	3.54	0	0	0
67	25do p24h002.nd2	5.76	5.69	0.89	0	0	0
68	25do p24h002.nd2	46.19	46.06	3.52	0	0	0
69	25do p24h002.nd2	20.42	20.12	3.51	0	0	0
70	25do p24h002.nd2	12.38	12.26	1.72	0	0	0
71	25do p24h002.nd2	15.68	15.44	2.7	0	0	0
72	25do p24h002.nd2	18.29	18.27	0.86	0	0	0
73	25do p24h002.nd2	17.35	17.33	0.87	0	0	0
74	25do p24h002.nd2	16.13	15.9	2.72	0	0	0
75	25do p24h002.nd2	0	0	0	0	0	0
76	25do p24h002.nd2	0	0	0	0	0	0
77	25do p24h002.nd2	14.63	13.91	4.51	0	0	0
78	25do p24h002.nd2	2.88	1.71	2.32	0	0	0
79	25do p24h002.nd2	2.82	1.55	2.36	0	0	0
80	25do p24h002.nd2	13.45	13.42	0.88	0	0	0
81	25do p24h002.nd2	26.17	25.65	5.19	0	0	0
82	25do p24h002.nd2	35.08	34.91	3.45	0	0	0
83	25do p24h002.nd2	37.34	37.25	2.61	0	0	0
84	25do p24h002.nd2	35.87	35.87	0.07	0	0	0
85	25do p24h002.nd2	0	0	0	0	0	0
86	25do p24h002.nd2	2.68	0.58	2.61	0	0	0
87	25do p24h002.nd2	1.65	1.65	0	0	0	0
88	25do p24h002.nd2	37.86	37.86	0	0	0	0
89	25do p24h002.nd2	16.16	15.78	3.49	0	0	0
90	25do p24h002.nd2	16.69	16.69	0.05	0	0	0
91	25do p24h002.nd2	14.61	14.59	0.85	0	0	0
92	25do p24h002.nd2	3.44	0.71	3.37	0	0	0
93	25do p24h002.nd2	21	20.7	3.54	0	0	0
94	25do p24h002.nd2	9.4	9.04	2.59	0	0	0
95	25do p24h002.nd2	0.11	0.11	0	0	0	0
96	25do p24h002.nd2	12.03	12	0.85	0	0	0
97	25do p24h002.nd2	20.4	20.38	0.87	0	0	0
98	25do p24h002.nd2	31.31	30.85	5.31	0	0	0
99	25do p24h002.nd2	38.88	38.87	0.78	0	0	0
100	25do p24h002.nd2	3.84	3.84	0.02	0	0	0
101	25do p24h002.nd2	12.52	11.8	4.18	0	0	0
102	25do p24h002.nd2	18.19	18.17	0.86	0	0	0
103	25do p24h002.nd2	8.01	7.59	2.55	0	0	0
104	25do p24h002.nd2	1.22	0.88	0.85	0	0	0
105	25do p24h002.nd2	0.31	0.31	0.001	0	0	0
106	25do p24h002.nd2	21.13	21.06	1.69	0	0	0
107	25do p24h002.nd2	2.19	1.35	1.72	0	0	0
108	25do p24h002.nd2	11.98	11.69	2.61	0	0	0
109	25do p24h002.nd2	9.62	9.58	0.9	0	0	0
110	25do p24h002.nd2	7.19	7.19	0.04	0	0	0
111	25do p24h002.nd2	20.47	20.32	2.43	0	0	0
112	25do p24h002.nd2	15.98	15.98	0	0	0	0
113	25do p24h002.nd2	0	0	0	0	0	0
114	25do p24h002.nd2	0	0	0	0	0	0
115	25do p24h002.nd2	18.37	18.3	1.58	0	0	0
116	25do p24h002.nd2	9.1	9.09	0.39	0	0	0
117	25do p24h002.nd2	10.47	10.47	0	0	0	0
118	25do p24h002.nd2	5.92	5.92	0	0	0	0
119	25do p24h002.nd2	26.15	26.12	1.42	0	0	0
120	25do p24h002.nd2	10.26	10.26	0	0	0	0
121	25do p24h002.nd2	11.5	11.47	0.76	0	0	0
122	25do p24h002.nd2	15.26	14.97	2.97	0	0	0
123	25do p24h002.nd2	9.93	9.93	0.03	0	0	0
124	25do p24h002.nd2	0	0	0	0	0	0
125	25do p24h002.nd2	1.74	1.05	1.39	0	0	0
126	25do p24h002.nd2	3.34	3.34	0	0	0	0
127	25do p24h002.nd2	33.93	33.93	1e-05	0	0	0
128	25do p24h002.nd2	1.93	1.93	0	0	0	0
129	25do p24h002.nd2	28.19	28.08	2.48	0	0	0
130	25do p24h002.nd2	0.09	0.09	0.0002	0	0	0
Feature	Mean	St.Dev	Minimum	Maximum
Length xyz	14.56	11.42	0	60.71
Length xy	14.18	11.56	0	60.61
Height	1.98	1.91	0	8.85
Item	Source	Length xyz	Length xy	Height	ND.T	ND.Z	ND.M	Comment
1	25do p24h.nd2	21.19	21.08	2.2	0	0	0
2	25do p24h.nd2	14.03	13.27	4.53	0	0	0
3	25do p24h.nd2	5.9	5.9	0.001	0	0	0
4	25do p24h.nd2	20.19	19.66	4.59	0	0	0
5	25do p24h.nd2	17.18	17.18	0.002	0	0	0
6	25do p24h.nd2	5.62	5.41	1.54	0	0	0
7	25do p24h.nd2	11.34	11.34	0.004	0	0	0
8	25do p24h.nd2	40.86	40.85	0.86	0	0	0
9	25do p24h.nd2	39.65	39.61	1.74	0	0	0
10	25do p24h.nd2	23.73	23.73	0.04	0	0	0
11	25do p24h.nd2	25.4	25.4	0.02	0	0	0
12	25do p24h.nd2	21.59	21.46	2.4	0	0	0
13	25do p24h.nd2	9.84	9.71	1.57	0	0	0
14	25do p24h.nd2	8.4	8.4	0	0	0	0
15	25do p24h.nd2	16.06	16.04	0.81	0	0	0
16	25do p24h.nd2	15.86	15.84	0.79	0	0	0
17	25do p24h.nd2	17.89	17.88	0.78	0	0	0
18	25do p24h.nd2	11.33	11.09	2.35	0	0	0
19	25do p24h.nd2	2.06	1.35	1.56	0	0	0
20	25do p24h.nd2	2.86	2.4	1.54	0	0	0
21	25do p24h.nd2	0	0	0	0	0	0
22	25do p24h.nd2	40.68	40.6	2.56	0	0	0
23	25do p24h.nd2	9.2	8.91	2.29	0	0	0
24	25do p24h.nd2	8.97	8.93	0.91	0	0	0
25	25do p24h.nd2	5	4.63	1.89	0	0	0
26	25do p24h.nd2	5.69	0.75	5.64	0	0	0
27	25do p24h.nd2	6.26	3.85	4.94	0	0	0
28	25do p24h.nd2	9.07	7.46	5.16	0	0	0
29	25do p24h.nd2	8.93	8.82	1.41	0	0	0
30	25do p24h.nd2	6.65	6.65	0	0	0	0
31	25do p24h.nd2	13.6	13.6	6e-05	0	0	0
32	25do p24h.nd2	9.93	9.89	0.78	0	0	0
33	25do p24h.nd2	5.86	5.8	0.79	0	0	0
34	25do p24h.nd2	33	32.76	3.92	0	0	0
35	25do p24h.nd2	18.06	18.05	0.79	0	0	0
36	25do p24h.nd2	7.46	7.08	2.37	0	0	0
37	25do p24h.nd2	8.23	7.89	2.36	0	0	0
38	25do p24h.nd2	45.49	44.65	8.72	0	0	0
39	25do p24h.nd2	13.38	13.38	0	0	0	0
40	25do p24h.nd2	14.11	14.09	0.65	0	0	0
41	25do p24h.nd2	0	0	0	0	0	0
42	25do p24h.nd2	12.06	12.06	0.28	0	0	0
43	25do p24h.nd2	6.44	6.44	0	0	0	0
44	25do p24h.nd2	16.55	16.01	4.18	0	0	0
45	25do p24h.nd2	9.83	0.63	9.81	0	0	0
46	25do p24h.nd2	6.32	6.18	1.31	0	0	0
47	25do p24h.nd2	9.74	9.71	0.74	0	0	0
48	25do p24h.nd2	34.19	34.19	0.73	0	0	0
49	25do p24h.nd2	34.73	34.71	1.29	0	0	0
50	25do p24h.nd2	8.59	8.24	2.43	0	0	0
51	25do p24h.nd2	6.41	3.5	5.37	0	0	0
52	25do p24h.nd2	17.12	16.99	2.1	0	0	0
53	25do p24h.nd2	0	0	0	0	0	0
54	25do p24h.nd2	0	0	0	0	0	0
55	25do p24h.nd2	13.37	13.36	0.6	0	0	0
56	25do p24h.nd2	1.07	1.07	0	0	0	0
57	25do p24h.nd2	10.65	10.63	0.73	0	0	0
58	25do p24h.nd2	10.18	9.21	4.35	0	0	0
59	25do p24h.nd2	36.4	36.39	0.77	0	0	0
60	25do p24h.nd2	39.76	39.43	5.16	0	0	0
61	25do p24h.nd2	13.3	12.8	3.62	0	0	0
62	25do p24h.nd2	10.01	9.55	3.02	0	0	0
63	25do p24h.nd2	13.21	12.42	4.5	0	0	0
64	25do p24h.nd2	0.79	0.79	0	0	0	0
65	25do p24h.nd2	7	6.83	1.54	0	0	0
66	25do p24h.nd2	7.64	6.07	4.64	0	0	0
67	25do p24h.nd2	6.56	6.51	0.78	0	0	0
68	25do p24h.nd2	16.35	15.89	3.88	0	0	0
69	25do p24h.nd2	5.34	5.34	0.03	0	0	0
70	25do p24h.nd2	3.82	3.74	0.78	0	0	0
71	25do p24h.nd2	11.31	11.31	0	0	0	0
72	25do p24h.nd2	3.69	3.6	0.8	0	0	0
73	25do p24h.nd2	5.87	5.81	0.78	0	0	0
74	25do p24h.nd2	23.37	23.37	0	0	0	0
75	25do p24h.nd2	0	0	0	0	0	0
76	25do p24h.nd2	7.74	6.73	3.83	0	0	0
77	25do p24h.nd2	25.35	25.35	2e-05	0	0	0
78	25do p24h.nd2	29.06	29.06	0.65	0	0	0
79	25do p24h.nd2	9.33	9.22	1.4	0	0	0
80	25do p24h.nd2	4.43	4.43	0	0	0	0
81	25do p24h.nd2	7.41	7.41	0.03	0	0	0
82	25do p24h.nd2	33.06	32.91	3.17	0	0	0
83	25do p24h.nd2	0	0	0	0	0	0
84	25do p24h.nd2	3.45	2.73	2.11	0	0	0
85	25do p24h.nd2	5.17	5.17	0	0	0	0
86	25do p24h.nd2	8.45	8.45	0	0	0	0
87	25do p24h.nd2	25.04	24.99	1.64	0	0	0
88	25do p24h.nd2	6.66	6.31	2.14	0	0	0
89	25do p24h.nd2	6.52	6.52	0	0	0	0
90	25do p24h.nd2	7.23	7.2	0.69	0	0	0
91	25do p24h.nd2	2.65	2.57	0.68	0	0	0
92	25do p24h.nd2	9	8.9	1.35	0	0	0
93	25do p24h.nd2	0	0	0	0	0	0
94	25do p24h.nd2	18.35	18.3	1.35	0	0	0
95	25do p24h.nd2	0	0	0	0	0	0
96	25do p24h.nd2	12.51	12.5	0.61	0	0	0
97	25do p24h.nd2	32.14	32.14	0.66	0	0	0
98	25do p24h.nd2	3.3	3.24	0.66	0	0	0
99	25do p24h.nd2	0	0	0	0	0	0
100	25do p24h.nd2	0	0	0	0	0	0
101	25do p24h.nd2	3.84	3.8	0.61	0	0	0
102	25do p24h.nd2	6.58	4.93	4.37	0	0	0
103	25do p24h.nd2	12.51	12.45	1.25	0	0	0
104	25do p24h.nd2	6.62	6.59	0.57	0	0	0
105	25do p24h.nd2	20.04	20.03	0.26	0	0	0
106	25do p24h.nd2	4.15	3.97	1.21	0	0	0
107	25do p24h.nd2	1.31	1.05	0.78	0	0	0
108	25do p24h.nd2	2.29	2.29	0	0	0	0
109	25do p24h.nd2	5.57	4.79	2.84	0	0	0
110	25do p24h.nd2	6.39	6.35	0.73	0	0	0
111	25do p24h.nd2	16.79	16.53	2.92	0	0	0
112	25do p24h.nd2	7.28	7.24	0.73	0	0	0
113	25do p24h.nd2	7.92	7.92	1e-05	0	0	0
114	25do p24h.nd2	9.2	9.08	1.47	0	0	0
115	25do p24h.nd2	10.51	10.28	2.19	0	0	0
116	25do p24h.nd2	8.67	8.39	2.17	0	0	0
117	25do p24h.nd2	8.58	8.58	1e-05	0	0	0
118	25do p24h.nd2	4.2	4.14	0.73	0	0	0
119	25do p24h.nd2	7.99	6.9	4.03	0	0	0
120	25do p24h.nd2	3.76	3.53	1.29	0	0	0
121	25do p24h.nd2	17.58	17.56	0.74	0	0	0
122	25do p24h.nd2	11.93	11.77	1.95	0	0	0
123	25do p24h.nd2	8.9	8.06	3.77	0	0	0
124	25do p24h.nd2	29.32	29.32	5e-05	0	0	0
125	25do p24h.nd2	1.88	1.75	0.7	0	0	0
126	25do p24h.nd2	24.8	24.73	1.93	0	0	0
127	25do p24h.nd2	21.5	21.49	0.79	0	0	0
128	25do p24h.nd2	19.55	19.42	2.24	0	0	0
129	25do p24h.nd2	3.35	3.35	0.004	0	0	0
130	25do p24h.nd2	6.59	6.59	0.01	0	0	0
131	25do p24h.nd2	10.77	10.05	3.87	0	0	0
132	25do p24h.nd2	17.95	17.95	0.01	0	0	0
133	25do p24h.nd2	15.42	15.24	2.38	0	0	0
134	25do p24h.nd2	5.92	5.71	1.57	0	0	0
135	25do p24h.nd2	8.14	8.1	0.8	0	0	0
136	25do p24h.nd2	8.22	8.06	1.58	0	0	0
137	25do p24h.nd2	6.23	6.23	0.001	0	0	0
138	25do p24h.nd2	0	0	0	0	0	0
139	25do p24h.nd2	18.06	17.64	3.89	0	0	0
140	25do p24h.nd2	4.8	4.8	0.003	0	0	0
141	25do p24h.nd2	4.72	4.72	0.001	0	0	0
142	25do p24h.nd2	13.48	13.48	0.005	0	0	0
143	25do p24h.nd2	9.37	9.34	0.79	0	0	0
144	25do p24h.nd2	26.39	26.34	1.64	0	0	0
145	25do p24h.nd2	32.57	32.55	0.89	0	0	0
146	25do p24h.nd2	12.42	12.21	2.28	0	0	0
Feature	Mean	St.Dev	Minimum	Maximum
Length xyz	12.01	10.01	0	45.49
Length xy	11.7	10.12	0	44.65
Height	1.49	1.73	0	9.81
Item	Source	Length xyz	Length xy	Height	ND.T	ND.Z	ND.M	Comment
1	25do p24h002.nd2	36.49	36.49	0.04	0	0	0
2	25do p24h002.nd2	1.65	1.65	0.002	0	0	0
3	25do p24h002.nd2	10.83	10.79	0.92	0	0	0
4	25do p24h002.nd2	31.83	31.62	3.65	0	0	0
5	25do p24h002.nd2	32.93	32.61	4.59	0	0	0
6	25do p24h002.nd2	9.02	9.02	0.02	0	0	0
7	25do p24h002.nd2	26.79	26.55	3.63	0	0	0
8	25do p24h002.nd2	10.79	10.63	1.8	0	0	0
9	25do p24h002.nd2	13.56	13.53	0.91	0	0	0
10	25do p24h002.nd2	7.15	6.94	1.74	0	0	0
11	25do p24h002.nd2	31.66	31.66	0.1	0	0	0
12	25do p24h002.nd2	16.84	16.82	0.88	0	0	0
13	25do p24h002.nd2	34.74	34.73	0.81	0	0	0
14	25do p24h002.nd2	13.71	12.94	4.54	0	0	0
15	25do p24h002.nd2	10.16	9.79	2.7	0	0	0
16	25do p24h002.nd2	22.38	22.22	2.69	0	0	0
17	25do p24h002.nd2	30.87	30.84	1.55	0	0	0
18	25do p24h002.nd2	41.52	41.39	3.3	0	0	0
19	25do p24h002.nd2	39.28	38.72	6.61	0	0	0
20	25do p24h002.nd2	22.11	21.71	4.2	0	0	0
21	25do p24h002.nd2	18.12	18.03	1.79	0	0	0
22	25do p24h002.nd2	10.65	10.65	0.01	0	0	0
23	25do p24h002.nd2	8.17	7.97	1.8	0	0	0
24	25do p24h002.nd2	11.06	11.02	0.92	0	0	0
25	25do p24h002.nd2	12.5	12.19	2.74	0	0	0
26	25do p24h002.nd2	17.63	17.55	1.7	0	0	0
27	25do p24h002.nd2	14.42	14.39	0.88	0	0	0
28	25do p24h002.nd2	0.49	0.49	0.0001	0	0	0
29	25do p24h002.nd2	0	0	0	0	0	0
30	25do p24h002.nd2	0	0	0	0	0	0
31	25do p24h002.nd2	36.86	36.86	0	0	0	0
32	25do p24h002.nd2	30.93	30.71	3.64	0	0	0
33	25do p24h002.nd2	24.52	24.4	2.51	0	0	0
34	25do p24h002.nd2	52.19	52.18	0.91	0	0	0
35	25do p24h002.nd2	17.83	17.46	3.58	0	0	0
36	25do p24h002.nd2	6.63	6.12	2.55	0	0	0
37	25do p24h002.nd2	4.35	4.35	0	0	0	0
38	25do p24h002.nd2	7.67	7.62	0.87	0	0	0
39	25do p24h002.nd2	8.4	8.36	0.86	0	0	0
40	25do p24h002.nd2	25.97	25.97	0.14	0	0	0
41	25do p24h002.nd2	14.88	14.52	3.28	0	0	0
42	25do p24h002.nd2	4.9	4.82	0.85	0	0	0
43	25do p24h002.nd2	0	0	0	0	0	0
44	25do p24h002.nd2	1	1	0	0	0	0
45	25do p24h002.nd2	0.24	0.24	0	0	0	0
46	25do p24h002.nd2	17.2	17	2.61	0	0	0
47	25do p24h002.nd2	6.19	6.19	0	0	0	0
48	25do p24h002.nd2	3.12	3	0.86	0	0	0
49	25do p24h002.nd2	11.23	11.23	0	0	0	0
50	25do p24h002.nd2	6.53	6.53	0	0	0	0
51	25do p24h002.nd2	9.14	8.99	1.65	0	0	0
52	25do p24h002.nd2	8.99	7.2	5.38	0	0	0
53	25do p24h002.nd2	20.14	20.06	1.86	0	0	0
54	25do p24h002.nd2	1.03	0.49	0.91	0	0	0
55	25do p24h002.nd2	8.64	8.64	0	0	0	0
56	25do p24h002.nd2	13.5	13.5	0.04	0	0	0
57	25do p24h002.nd2	21.81	21.73	1.85	0	0	0
58	25do p24h002.nd2	2.25	2.07	0.9	0	0	0
59	25do p24h002.nd2	15.03	14.04	5.36	0	0	0
60	25do p24h002.nd2	10.71	8.74	6.2	0	0	0
61	25do p24h002.nd2	15.58	14.95	4.39	0	0	0
62	25do p24h002.nd2	24.72	24.58	2.64	0	0	0
63	25do p24h002.nd2	7.66	7.46	1.72	0	0	0
64	25do p24h002.nd2	7.89	7.47	2.56	0	0	0
65	25do p24h002.nd2	0	0	0	0	0	0
66	25do p24h002.nd2	11.26	11.23	0.83	0	0	0
67	25do p24h002.nd2	2.76	2.21	1.64	0	0	0
68	25do p24h002.nd2	23.63	23.5	2.43	0	0	0
69	25do p24h002.nd2	9.97	9.48	3.1	0	0	0
70	25do p24h002.nd2	3.81	3.39	1.73	0	0	0
71	25do p24h002.nd2	3.04	2.47	1.77	0	0	0
72	25do p24h002.nd2	17.01	16.99	0.93	0	0	0
73	25do p24h002.nd2	8.85	7.85	4.1	0	0	0
74	25do p24h002.nd2	3.46	3.11	1.52	0	0	0
75	25do p24h002.nd2	40.38	40.02	5.34	0	0	0
76	25do p24h002.nd2	28.76	28.63	2.75	0	0	0
77	25do p24h002.nd2	14.52	12.62	7.18	0	0	0
78	25do p24h002.nd2	6.54	6.54	0.06	0	0	0
79	25do p24h002.nd2	3.68	2.21	2.95	0	0	0
80	25do p24h002.nd2	11.21	10.98	2.25	0	0	0
81	25do p24h002.nd2	0.75	0.25	0.71	0	0	0
82	25do p24h002.nd2	7.65	6.66	3.76	0	0	0
83	25do p24h002.nd2	10.55	10.26	2.47	0	0	0
84	25do p24h002.nd2	6.33	6.27	0.85	0	0	0
85	25do p24h002.nd2	46.71	46.69	1.51	0	0	0
86	25do p24h002.nd2	10.59	10.47	1.6	0	0	0
87	25do p24h002.nd2	16.74	16.43	3.25	0	0	0
88	25do p24h002.nd2	35.32	34.64	6.93	0	0	0
89	25do p24h002.nd2	13.35	12.5	4.68	0	0	0
90	25do p24h002.nd2	13.96	13.73	2.48	0	0	0
91	25do p24h002.nd2	5.83	5.76	0.85	0	0	0
92	25do p24h002.nd2	34	33.57	5.37	0	0	0
93	25do p24h002.nd2	11.58	10.65	4.55	0	0	0
94	25do p24h002.nd2	3.94	1.48	3.65	0	0	0
95	25do p24h002.nd2	1.2	0.78	0.91	0	0	0
96	25do p24h002.nd2	25.64	25.64	0	0	0	0
97	25do p24h002.nd2	19.03	19.03	0	0	0	0
98	25do p24h002.nd2	17.59	17.51	1.75	0	0	0
99	25do p24h002.nd2	18.87	18.68	2.67	0	0	0
100	25do p24h002.nd2	20.15	20.07	1.75	0	0	0
101	25do p24h002.nd2	12.65	12.62	0.84	0	0	0
102	25do p24h002.nd2	8.8	6.38	6.06	0	0	0
103	25do p24h002.nd2	8.65	8.61	0.88	0	0	0
104	25do p24h002.nd2	10.63	10.63	0.03	0	0	0
105	25do p24h002.nd2	12.59	12.34	2.49	0	0	0
106	25do p24h002.nd2	14.91	14.91	0.02	0	0	0
107	25do p24h002.nd2	0.23	0.23	0.0009	0	0	0
108	25do p24h002.nd2	3.28	3.17	0.81	0	0	0
109	25do p24h002.nd2	10.39	10.27	1.54	0	0	0
110	25do p24h002.nd2	29.14	29.05	2.3	0	0	0
111	25do p24h002.nd2	27.44	27.43	0.71	0	0	0
112	25do p24h002.nd2	20.93	20.58	3.84	0	0	0
113	25do p24h002.nd2	17.83	17.44	3.7	0	0	0
114	25do p24h002.nd2	4.48	4.48	0	0	0	0
115	25do p24h002.nd2	8.14	7.86	2.1	0	0	0
116	25do p24h002.nd2	10.48	10.45	0.69	0	0	0
117	25do p24h002.nd2	14.71	14.55	2.13	0	0	0
118	25do p24h002.nd2	4.65	4.65	0.02	0	0	0
119	25do p24h002.nd2	22.4	22.39	0.7	0	0	0
120	25do p24h002.nd2	15.25	15.2	1.28	0	0	0
121	25do p24h002.nd2	10.44	5.58	8.83	0	0	0
122	25do p24h002.nd2	15.03	14.97	1.36	0	0	0
123	25do p24h002.nd2	32.25	32.14	2.67	0	0	0
124	25do p24h002.nd2	18.3	17.75	4.42	0	0	0
125	25do p24h002.nd2	24.34	23.99	4.07	0	0	0
126	25do p24h002.nd2	12.3	7.33	9.87	0	0	0
127	25do p24h002.nd2	2.45	2.35	0.67	0	0	0
128	25do p24h002.nd2	28.69	28.69	0.73	0	0	0
129	25do p24h002.nd2	30.71	30.71	2e-05	0	0	0
130	25do p24h002.nd2	14.52	14.28	2.64	0	0	0
131	25do p24h002.nd2	3.31	3.31	0.005	0	0	0
132	25do p24h002.nd2	1.66	1.42	0.85	0	0	0
133	25do p24h002.nd2	17.89	17.89	0.03	0	0	0
134	25do p24h002.nd2	16.84	16.76	1.66	0	0	0
135	25do p24h002.nd2	7.01	4.07	5.71	0	0	0
136	25do p24h002.nd2	3.73	3.65	0.79	0	0	0
137	25do p24h002.nd2	12.9	12.9	0.01	0	0	0
138	25do p24h002.nd2	26.53	26.42	2.48	0	0	0
139	25do p24h002.nd2	5.09	4.79	1.73	0	0	0
140	25do p24h002.nd2	2.43	1.84	1.6	0	0	0
141	25do p24h002.nd2	19.64	19.62	0.83	0	0	0
142	25do p24h002.nd2	1.34	1.34	0.01	0	0	0
Feature	Mean	St.Dev	Minimum	Maximum
Length xyz	14.5	10.97	0	52.19
Length xy	14.15	11.08	0	52.18
Height	1.99	1.94	0	9.87

## Sheet: Fmi gogoWT
Item	Source	Length xyz	Length xy	Height	ND.T	ND.Z	ND.M	Comment
1	25do p24h002.nd2	20.54	20.54	0.03	0	0	0
2	25do p24h002.nd2	18.78	18.78	0.004	0	0	0				length	sample1	sample2	sample3	sample4	total
3	25do p24h002.nd2	10.63	10.59	0.89	0	0	0				5	64	65	60	76	265
4	25do p24h002.nd2	0	0	0	0	0	0				15	56	58	28	40	182
5	25do p24h002.nd2	0	0	0	0	0	0				25	8	10	15	3	36
6	25do p24h002.nd2	0	0	0	0	0	0				25~	9	8	9	4	30
7	25do p24h002.nd2	2.07	1.05	1.79	0	0	0					#N/A	#N/A	#N/A	#N/A
8	25do p24h002.nd2	2.44	1.65	1.79	0	0	0					#N/A	#N/A	#N/A	#N/A
9	25do p24h002.nd2	0	0	0	0	0	0					#N/A	#N/A	#N/A	#N/A
10	25do p24h002.nd2	0	0	0	0	0	0					#N/A	#N/A	#N/A	#N/A
11	25do p24h002.nd2	0	0	0	0	0	0					#N/A	#N/A	#N/A	#N/A
12	25do p24h002.nd2	0.64	0.64	0	0	0	0					#N/A	#N/A	#N/A	#N/A	#N/A
13	25do p24h002.nd2	0	0	0	0	0	0					#N/A	#N/A	#N/A	#N/A
14	25do p24h002.nd2	4.76	4.67	0.91	0	0	0					#N/A	#N/A	#N/A	#N/A
15	25do p24h002.nd2	3.48	3.48	0.01	0	0	0					#N/A	#N/A	#N/A	#N/A
16	25do p24h002.nd2	11.19	11.16	0.91	0	0	0					#N/A	#N/A	#N/A	#N/A
17	25do p24h002.nd2	0	0	0	0	0	0					#N/A	#N/A	#N/A	#N/A
18	25do p24h002.nd2	4.42	4.03	1.82	0	0	0
19	25do p24h002.nd2	13.51	13.48	0.86	0	0	0
20	25do p24h002.nd2	10.6	10.44	1.84	0	0	0
21	25do p24h002.nd2	4.77	4.69	0.9	0	0	0
22	25do p24h002.nd2	3.06	1.39	2.73	0	0	0
23	25do p24h002.nd2	2.35	2.17	0.9	0	0	0
24	25do p24h002.nd2	10.78	10.74	0.88	0	0	0
25	25do p24h002.nd2	11.39	11.24	1.82	0	0	0
26	25do p24h002.nd2	0	0	0	0	0	0
27	25do p24h002.nd2	4.28	3.38	2.63	0	0	0
28	25do p24h002.nd2	4.13	3.2	2.62	0	0	0
29	25do p24h002.nd2	7.81	7.76	0.88	0	0	0
30	25do p24h002.nd2	7.23	5.69	4.46	0	0	0
31	25do p24h002.nd2	8.32	5.65	6.1	0	0	0
32	25do p24h002.nd2	6.84	4.38	5.25	0	0	0
33	25do p24h002.nd2	0	0	0	0	0	0
34	25do p24h002.nd2	3.3	1.84	2.74	0	0	0
35	25do p24h002.nd2	0	0	0	0	0	0
36	25do p24h002.nd2	2.18	1.21	1.82	0	0	0
37	25do p24h002.nd2	2.48	1.69	1.81	0	0	0
38	25do p24h002.nd2	0	0	0	0	0	0
39	25do p24h002.nd2	3.27	2.76	1.76	0	0	0
40	25do p24h002.nd2	0	0	0	0	0	0
41	25do p24h002.nd2	0	0	0	0	0	0
42	25do p24h002.nd2	4.21	3.84	1.74	0	0	0
43	25do p24h002.nd2	0	0	0	0	0	0
44	25do p24h002.nd2	3.46	3.36	0.84	0	0	0
45	25do p24h002.nd2	13.16	12.92	2.46	0	0	0
46	25do p24h002.nd2	0	0	0	0	0	0
47	25do p24h002.nd2	27.35	26.38	7.21	0	0	0
48	25do p24h002.nd2	14.59	14.32	2.77	0	0	0
49	25do p24h002.nd2	7.32	7.1	1.78	0	0	0
50	25do p24h002.nd2	5.11	5.11	0.02	0	0	0
51	25do p24h002.nd2	6.24	5.66	2.62	0	0	0
52	25do p24h002.nd2	1.29	0.93	0.89	0	0	0
53	25do p24h002.nd2	8.05	7.85	1.76	0	0	0
54	25do p24h002.nd2	7.77	7.56	1.78	0	0	0
55	25do p24h002.nd2	3.13	3.13	0	0	0	0
56	25do p24h002.nd2	8.49	2.24	8.19	0	0	0
57	25do p24h002.nd2	8.28	8.13	1.57	0	0	0
58	25do p24h002.nd2	0.87	0.87	0	0	0	0
59	25do p24h002.nd2	2.14	1.47	1.56	0	0	0
60	25do p24h002.nd2	2.29	0.41	2.25	0	0	0
61	25do p24h002.nd2	3.06	0.74	2.97	0	0	0
62	25do p24h002.nd2	1.07	1.07	0	0	0	0
63	25do p24h002.nd2	1.3	1.3	0	0	0	0
64	25do p24h002.nd2	4.8	4.6	1.36	0	0	0
65	25do p24h002.nd2	1.58	0.64	1.44	0	0	0
66	25do p24h002.nd2	13.13	13.03	1.55	0	0	0
67	25do p24h002.nd2	3.68	3.61	0.71	0	0	0
68	25do p24h002.nd2	6.35	6.07	1.89	0	0	0
69	25do p24h002.nd2	31.51	31.17	4.58	0	0	0
70	25do p24h002.nd2	25.69	25.69	0.39	0	0	0
71	25do p24h002.nd2	1.32	1.14	0.67	0	0	0
72	25do p24h002.nd2	1.74	1.1	1.35	0	0	0
73	25do p24h002.nd2	1.35	1.35	0.03	0	0	0
74	25do p24h002.nd2	0.15	0.15	0.0008	0	0	0
75	25do p24h002.nd2	0	0	0	0	0	0
76	25do p24h002.nd2	0	0	0	0	0	0
77	25do p24h002.nd2	4.81	1.78	4.47	0	0	0
78	25do p24h002.nd2	2.59	2.43	0.9	0	0	0
79	25do p24h002.nd2	8.75	8.04	3.46	0	0	0
80	25do p24h002.nd2	5.88	3.74	4.54	0	0	0
81	25do p24h002.nd2	0	0	0	0	0	0
82	25do p24h002.nd2	0.63	0.63	0	0	0	0
83	25do p24h002.nd2	1.1	1.1	0	0	0	0
84	25do p24h002.nd2	5.38	5.07	1.81	0	0	0
85	25do p24h002.nd2	3.19	2.63	1.81	0	0	0
86	25do p24h002.nd2	7.88	7.83	0.93	0	0	0
87	25do p24h002.nd2	6.86	5.16	4.51	0	0	0
88	25do p24h002.nd2	3.58	3.58	0.04	0	0	0
89	25do p24h002.nd2	2.03	2.03	0	0	0	0
90	25do p24h002.nd2	9.82	3.64	9.12	0	0	0
91	25do p24h002.nd2	9.07	8.88	1.82	0	0	0
92	25do p24h002.nd2	3.19	2.62	1.83	0	0	0
93	25do p24h002.nd2	10.67	10.63	0.9	0	0	0
94	25do p24h002.nd2	3.56	3.56	0	0	0	0
95	25do p24h002.nd2	3.2	3.08	0.88	0	0	0
96	25do p24h002.nd2	4.17	4.08	0.9	0	0	0
97	25do p24h002.nd2	5.28	5.25	0.53	0	0	0
98	25do p24h002.nd2	4.76	4.73	0.54	0	0	0
99	25do p24h002.nd2	2.28	1.99	1.1	0	0	0
100	25do p24h002.nd2	0.32	0.32	0.0005	0	0	0
101	25do p24h002.nd2	4.01	2.41	3.2	0	0	0
102	25do p24h002.nd2	1.15	1.15	0.002	0	0	0
103	25do p24h002.nd2	6.37	6.37	0.002	0	0	0
104	25do p24h002.nd2	8.31	7.77	2.93	0	0	0
105	25do p24h002.nd2	4.48	4.48	0.005	0	0	0
106	25do p24h002.nd2	6.74	5.58	3.79	0	0	0
107	25do p24h002.nd2	2.13	2.13	0.02	0	0	0
108	25do p24h002.nd2	0	0	0	0	0	0
109	25do p24h002.nd2	5.2	4.43	2.72	0	0	0
110	25do p24h002.nd2	9.67	7.64	5.92	0	0	0
111	25do p24h002.nd2	2.67	2.67	0.02	0	0	0
112	25do p24h002.nd2	6.79	6.79	0.03	0	0	0
113	25do p24h002.nd2	6.65	3.05	5.91	0	0	0
114	25do p24h002.nd2	42.25	42.06	3.98	0	0	0
115	25do p24h002.nd2	6.43	4.78	4.29	0	0	0
116	25do p24h002.nd2	4.55	3.61	2.76	0	0	0
117	25do p24h002.nd2	0	0	0	0	0	0
118	25do p24h002.nd2	9.73	9.39	2.55	0	0	0
119	25do p24h002.nd2	9.55	9.13	2.78	0	0	0
120	25do p24h002.nd2	16.65	15.39	6.34	0	0	0
121	25do p24h002.nd2	3.34	3	1.47	0	0	0
122	25do p24h002.nd2	0	0	0	0	0	0
123	25do p24h002.nd2	4.99	4.99	0	0	0	0
Feature	Mean	St.Dev	Minimum	Maximum
Length xyz	5.5	6.5	0	42.25
Length xy	4.97	6.47	0	42.06
Height	1.56	1.89	0	9.12
Item	Source	Length xyz	Length xy	Height	ND.T	ND.Z	ND.M	Comment
1	25do p24h002.nd2	14.81	14.72	1.66	0	0	0
2	25do p24h002.nd2	14.71	13.78	5.14	0	0	0
3	25do p24h002.nd2	17.88	17.35	4.35	0	0	0
4	25do p24h002.nd2	21.32	21.16	2.64	0	0	0
5	25do p24h002.nd2	13.77	13.77	0.004	0	0	0
6	25do p24h002.nd2	23.33	22.72	5.3	0	0	0
7	25do p24h002.nd2	15.94	15.84	1.77	0	0	0
8	25do p24h002.nd2	9	8.57	2.74	0	0	0
9	25do p24h002.nd2	0	0	0	0	0	0
10	25do p24h002.nd2	2.8	0.71	2.7	0	0	0
11	25do p24h002.nd2	15.95	15.95	0	0	0	0
12	25do p24h002.nd2	13.16	13.13	0.92	0	0	0
13	25do p24h002.nd2	16.72	16.72	0	0	0	0
14	25do p24h002.nd2	13.03	12.52	3.6	0	0	0
15	25do p24h002.nd2	0	0	0	0	0	0
16	25do p24h002.nd2	0	0	0	0	0	0
17	25do p24h002.nd2	10.37	9.71	3.62	0	0	0
18	25do p24h002.nd2	16.51	16.46	1.31	0	0	0
19	25do p24h002.nd2	4.99	4.99	0.04	0	0	0
20	25do p24h002.nd2	8.06	7.85	1.84	0	0	0
21	25do p24h002.nd2	0	0	0	0	0	0
22	25do p24h002.nd2	3.4	1.7	2.95	0	0	0
23	25do p24h002.nd2	2.38	0.8	2.24	0	0	0
24	25do p24h002.nd2	1.65	1.65	0	0	0	0
25	25do p24h002.nd2	2.57	2.57	0.003	0	0	0
26	25do p24h002.nd2	3.4	3.02	1.55	0	0	0
27	25do p24h002.nd2	1.56	1.56	0	0	0	0
28	25do p24h002.nd2	7.97	7.97	0.02	0	0	0
29	25do p24h002.nd2	2	2	0.003	0	0	0
30	25do p24h002.nd2	2.91	2.09	2.02	0	0	0
31	25do p24h002.nd2	1.28	0.71	1.06	0	0	0
32	25do p24h002.nd2	0.72	0.72	3e-05	0	0	0
33	25do p24h002.nd2	0	0	0	0	0	0
34	25do p24h002.nd2	4.08	4.08	0	0	0	0
35	25do p24h002.nd2	3.16	3.09	0.63	0	0	0
36	25do p24h002.nd2	17.24	17.13	1.93	0	0	0
37	25do p24h002.nd2	1.92	1.71	0.89	0	0	0
38	25do p24h002.nd2	3.95	1.84	3.49	0	0	0
39	25do p24h002.nd2	2.45	1.55	1.9	0	0	0
40	25do p24h002.nd2	1.91	0.59	1.81	0	0	0
41	25do p24h002.nd2	0	0	0	0	0	0
42	25do p24h002.nd2	12.67	12.37	2.73	0	0	0
43	25do p24h002.nd2	3.38	2.06	2.68	0	0	0
44	25do p24h002.nd2	15.92	14.98	5.39	0	0	0
45	25do p24h002.nd2	0.92	0.16	0.9	0	0	0
46	25do p24h002.nd2	7.31	4.91	5.41	0	0	0
47	25do p24h002.nd2	11.67	11.54	1.77	0	0	0
48	25do p24h002.nd2	0	0	0	0	0	0
49	25do p24h002.nd2	9.47	7.9	5.23	0	0	0
50	25do p24h002.nd2	11.71	11.42	2.6	0	0	0
51	25do p24h002.nd2	13.43	13.43	0	0	0	0
52	25do p24h002.nd2	6.01	6.01	0	0	0	0
53	25do p24h002.nd2	18.25	17.2	6.1	0	0	0
54	25do p24h002.nd2	25.56	25.55	0.92	0	0	0
55	25do p24h002.nd2	21.55	20.98	4.95	0	0	0
56	25do p24h002.nd2	22.99	22.97	0.85	0	0	0
57	25do p24h002.nd2	0	0	0	0	0	0
58	25do p24h002.nd2	0	0	0	0	0	0
59	25do p24h002.nd2	0	0	0	0	0	0
60	25do p24h002.nd2	1.4	1.4	0.002	0	0	0
61	25do p24h002.nd2	14.72	14.16	4.04	0	0	0
62	25do p24h002.nd2	6.98	6.62	2.2	0	0	0
63	25do p24h002.nd2	1.45	1.26	0.72	0	0	0
64	25do p24h002.nd2	1.54	1.54	0	0	0	0
65	25do p24h002.nd2	1.02	0.71	0.73	0	0	0
66	25do p24h002.nd2	21.78	19.78	9.11	0	0	0
67	25do p24h002.nd2	0	0	0	0	0	0
68	25do p24h002.nd2	3.77	1.16	3.59	0	0	0
69	25do p24h002.nd2	49.9	49.82	2.69	0	0	0
70	25do p24h002.nd2	3.8	1.05	3.65	0	0	0
71	25do p24h002.nd2	0.44	0.44	0	0	0	0
72	25do p24h002.nd2	24.31	24.3	0.73	0	0	0
73	25do p24h002.nd2	10.36	10.21	1.78	0	0	0
74	25do p24h002.nd2	9.05	8.87	1.79	0	0	0
75	25do p24h002.nd2	2.8	2.65	0.9	0	0	0
76	25do p24h002.nd2	5.15	2.64	4.43	0	0	0
77	25do p24h002.nd2	2.18	2.18	0.02	0	0	0
78	25do p24h002.nd2	2.99	2.38	1.81	0	0	0
79	25do p24h002.nd2	0	0	0	0	0	0
80	25do p24h002.nd2	13.54	10.91	8.03	0	0	0
81	25do p24h002.nd2	29.07	27.91	8.13	0	0	0
82	25do p24h002.nd2	39.14	39.14	0	0	0	0
83	25do p24h002.nd2	5.87	2.91	5.1	0	0	0
84	25do p24h002.nd2	4.9	4.9	0	0	0	0
85	25do p24h002.nd2	4.84	4.84	0	0	0	0
86	25do p24h002.nd2	51.78	51.78	0.74	0	0	0
87	25do p24h002.nd2	12.68	12.68	0.05	0	0	0
88	25do p24h002.nd2	12.76	12.27	3.51	0	0	0
89	25do p24h002.nd2	41.33	41.31	1.13	0	0	0
90	25do p24h002.nd2	51.05	51	2.11	0	0	0
91	25do p24h002.nd2	40.5	40.48	1.3	0	0	0
92	25do p24h002.nd2	17.28	17.1	2.49	0	0	0
93	25do p24h002.nd2	9.69	9.69	0.09	0	0	0
94	25do p24h002.nd2	44.73	44.41	5.33	0	0	0
95	25do p24h002.nd2	1.96	1	1.68	0	0	0
96	25do p24h002.nd2	1.45	1.3	0.65	0	0	0
97	25do p24h002.nd2	1.55	1.55	0.003	0	0	0
98	25do p24h002.nd2	0.21	0.21	0.0002	0	0	0
99	25do p24h002.nd2	0.89	0.65	0.61	0	0	0
100	25do p24h002.nd2	1.4	0.74	1.19	0	0	0
101	25do p24h002.nd2	5.07	2.66	4.32	0	0	0
102	25do p24h002.nd2	3.37	2.22	2.53	0	0	0
103	25do p24h002.nd2	3.8	3.69	0.9	0	0	0
104	25do p24h002.nd2	5.55	5.48	0.88	0	0	0
105	25do p24h002.nd2	3.18	3.18	0	0	0	0
106	25do p24h002.nd2	1.87	1.64	0.9	0	0	0
107	25do p24h002.nd2	2.77	0.67	2.69	0	0	0
108	25do p24h002.nd2	0.56	0.56	0.0002	0	0	0
109	25do p24h002.nd2	0.9	0.9	0.001	0	0	0
110	25do p24h002.nd2	0.71	0.71	0.001	0	0	0
111	25do p24h002.nd2	2.85	2.72	0.83	0	0	0
112	25do p24h002.nd2	3.61	3.61	0.004	0	0	0
Feature	Mean	St.Dev	Minimum	Maximum
Length xyz	9.48	11.69	0	51.78
Length xy	9	11.77	0	51.78
Height	1.71	2	0	9.11
Item	Source	Length xyz	Length xy	Height	ND.T	ND.Z	ND.M	Comment
1	25do p24h002.nd2	8.73	8.68	0.89	0	0	0
2	25do p24h002.nd2	28.43	27.9	5.46	0	0	0
3	25do p24h002.nd2	0.97	0.35	0.91	0	0	0
4	25do p24h002.nd2	6.97	5.27	4.55	0	0	0
5	25do p24h002.nd2	3.41	3.41	0.0008	0	0	0
6	25do p24h002.nd2	5.05	5.05	0.002	0	0	0
7	25do p24h002.nd2	9.97	9.97	0.0001	0	0	0
8	25do p24h002.nd2	5.48	5.48	0.0008	0	0	0
9	25do p24h002.nd2	2.3	2.3	0.0001	0	0	0
10	25do p24h002.nd2	3.78	3.67	0.91	0	0	0
11	25do p24h002.nd2	10.22	9.86	2.69	0	0	0
12	25do p24h002.nd2	6.42	6.35	0.89	0	0	0
13	25do p24h002.nd2	0.84	0.84	0.0009	0	0	0
14	25do p24h002.nd2	4.1	4.01	0.86	0	0	0
15	25do p24h002.nd2	10.4	10.37	0.88	0	0	0
16	25do p24h002.nd2	1.93	1.93	0.01	0	0	0
17	25do p24h002.nd2	0	0	0	0	0	0
18	25do p24h002.nd2	0	0	0	0	0	0
19	25do p24h002.nd2	0.15	0.15	0.0002	0	0	0
20	25do p24h002.nd2	19.1	19.09	0.64	0	0	0
21	25do p24h002.nd2	2.9	2.45	1.55	0	0	0
22	25do p24h002.nd2	0	0	0	0	0	0
23	25do p24h002.nd2	3.53	3.53	0.06	0	0	0
24	25do p24h002.nd2	4.42	4.08	1.71	0	0	0
25	25do p24h002.nd2	7.04	7	0.74	0	0	0
26	25do p24h002.nd2	13.5	13.34	2.1	0	0	0
27	25do p24h002.nd2	4.47	4.24	1.42	0	0	0
28	25do p24h002.nd2	3.72	3.07	2.11	0	0	0
29	25do p24h002.nd2	6.32	6.18	1.36	0	0	0
30	25do p24h002.nd2	11.06	11.06	0	0	0	0
31	25do p24h002.nd2	4.59	4.59	0	0	0	0
32	25do p24h002.nd2	2.77	1.85	2.06	0	0	0
33	25do p24h002.nd2	6.37	6.32	0.74	0	0	0
34	25do p24h002.nd2	10.74	10.65	1.36	0	0	0
35	25do p24h002.nd2	5.3	5.27	0.62	0	0	0
36	25do p24h002.nd2	8	8	0.08	0	0	0
37	25do p24h002.nd2	0	0	0	0	0	0
38	25do p24h002.nd2	0	0	0	0	0	0
39	25do p24h002.nd2	1.41	1.41	0	0	0	0
40	25do p24h002.nd2	3.92	3.92	0	0	0	0
41	25do p24h002.nd2	3.68	3.27	1.69	0	0	0
42	25do p24h002.nd2	3.73	3.63	0.86	0	0	0
43	25do p24h002.nd2	7.89	7.69	1.77	0	0	0
44	25do p24h002.nd2	8.36	8.36	0.03	0	0	0
45	25do p24h002.nd2	6.96	6.73	1.77	0	0	0
46	25do p24h002.nd2	37.92	37.9	0.9	0	0	0
47	25do p24h002.nd2	9.97	9.81	1.83	0	0	0
48	25do p24h002.nd2	16.43	16.4	0.94	0	0	0
49	25do p24h002.nd2	15.3	15.28	0.9	0	0	0
50	25do p24h002.nd2	29.3	29.3	0.01	0	0	0
51	25do p24h002.nd2	10.23	10.2	0.76	0	0	0
52	25do p24h002.nd2	4.89	4.82	0.81	0	0	0
53	25do p24h002.nd2	2	1.15	1.64	0	0	0
54	25do p24h002.nd2	21.48	21	4.51	0	0	0
55	25do p24h002.nd2	15.74	15.71	0.89	0	0	0
56	25do p24h002.nd2	3.88	1.59	3.54	0	0	0
57	25do p24h002.nd2	3.14	3.14	0.01	0	0	0
58	25do p24h002.nd2	10.79	10.64	1.82	0	0	0
59	25do p24h002.nd2	8.12	6.74	4.52	0	0	0
60	25do p24h002.nd2	10.57	9.04	5.47	0	0	0
61	25do p24h002.nd2	12.05	11.73	2.72	0	0	0
62	25do p24h002.nd2	25.64	25.62	0.98	0	0	0
63	25do p24h002.nd2	9.99	9.61	2.73	0	0	0
64	25do p24h002.nd2	10.84	10.69	1.82	0	0	0
65	25do p24h002.nd2	18.26	17.69	4.52	0	0	0
66	25do p24h002.nd2	0	0	0	0	0	0
67	25do p24h002.nd2	4.49	1.75	4.13	0	0	0
68	25do p24h002.nd2	0.8	0.8	0	0	0	0
69	25do p24h002.nd2	1.01	1.01	0	0	0	0
70	25do p24h002.nd2	11.07	11.07	0	0	0	0
71	25do p24h002.nd2	6.88	6.64	1.81	0	0	0
72	25do p24h002.nd2	3.93	3.82	0.9	0	0	0
73	25do p24h002.nd2	6.62	6.36	1.81	0	0	0
74	25do p24h002.nd2	9.39	9.39	0.02	0	0	0
75	25do p24h002.nd2	5.34	5.26	0.91	0	0	0
76	25do p24h002.nd2	39.58	39.5	2.64	0	0	0
77	25do p24h002.nd2	14.85	13.82	5.43	0	0	0
78	25do p24h002.nd2	26.81	26.58	3.53	0	0	0
79	25do p24h002.nd2	9.5	9.32	1.8	0	0	0
80	25do p24h002.nd2	2.26	2.26	0	0	0	0
81	25do p24h002.nd2	9.38	9.38	0.1	0	0	0
82	25do p24h002.nd2	9.03	8.85	1.78	0	0	0
83	25do p24h002.nd2	6.18	6.11	0.93	0	0	0
84	25do p24h002.nd2	8.02	7.17	3.59	0	0	0
85	25do p24h002.nd2	0.61	0.61	0	0	0	0
86	25do p24h002.nd2	7.01	7.01	0	0	0	0
87	25do p24h002.nd2	1.03	0.49	0.9	0	0	0
88	25do p24h002.nd2	3.21	3.21	0.004	0	0	0
89	25do p24h002.nd2	3.18	1.63	2.73	0	0	0
90	25do p24h002.nd2	5.26	5.18	0.92	0	0	0
91	25do p24h002.nd2	3.99	1.65	3.63	0	0	0
92	25do p24h002.nd2	14.49	14.46	0.88	0	0	0
93	25do p24h002.nd2	3.39	3.39	0	0	0	0
94	25do p24h002.nd2	0.79	0.79	0	0	0	0
95	25do p24h002.nd2	2.01	2.01	0	0	0	0
96	25do p24h002.nd2	0	0	0	0	0	0
97	25do p24h002.nd2	16.98	16.96	0.71	0	0	0
98	25do p24h002.nd2	33.29	32.75	5.96	0	0	0
99	25do p24h002.nd2	1.49	1.49	0	0	0	0
100	25do p24h002.nd2	1.98	1.78	0.86	0	0	0
101	25do p24h002.nd2	5.52	5.23	1.76	0	0	0
102	25do p24h002.nd2	0.98	0.98	0.0009	0	0	0
103	25do p24h002.nd2	3	3	0.03	0	0	0
104	25do p24h002.nd2	6.66	6.66	0.03	0	0	0
105	25do p24h002.nd2	6.28	5.67	2.69	0	0	0
106	25do p24h002.nd2	6.74	5.76	3.48	0	0	0
107	25do p24h002.nd2	14.4	14.29	1.79	0	0	0
108	25do p24h002.nd2	9.14	8.96	1.79	0	0	0
109	25do p24h002.nd2	4.93	4.85	0.91	0	0	0
110	25do p24h002.nd2	4.27	4.27	0.03	0	0	0
111	25do p24h002.nd2	4.87	4.87	0.04	0	0	0
112	25do p24h002.nd2	6.26	5.14	3.57	0	0	0
113	25do p24h002.nd2	0	0	0	0	0	0
114	25do p24h002.nd2	18.75	18.73	0.87	0	0	0
115	25do p24h002.nd2	32.66	32.56	2.66	0	0	0
116	25do p24h002.nd2	13.32	12.52	4.55	0	0	0
117	25do p24h002.nd2	13.39	13.35	0.93	0	0	0
118	25do p24h002.nd2	14.89	14.63	2.74	0	0	0
119	25do p24h002.nd2	14.66	14.54	1.85	0	0	0
120	25do p24h002.nd2	5.3	5.23	0.88	0	0	0
121	25do p24h002.nd2	1.15	1.15	0	0	0	0
122	25do p24h002.nd2	5.02	4.68	1.82	0	0	0
123	25do p24h002.nd2	4.35	4.25	0.91	0	0	0
124	25do p24h002.nd2	3.14	3	0.91	0	0	0
125	25do p24h002.nd2	0	0	0	0	0	0
126	25do p24h002.nd2	1.47	1.16	0.91	0	0	0
127	25do p24h002.nd2	3.68	0.48	3.65	0	0	0
128	25do p24h002.nd2	3.34	3.34	0.002	0	0	0
129	25do p24h002.nd2	2.2	2.2	0.0007	0	0	0
130	25do p24h002.nd2	0.41	0.41	0.001	0	0	0
131	25do p24h002.nd2	1.24	0.92	0.84	0	0	0
132	25do p24h002.nd2	1.69	1.48	0.82	0	0	0
133	25do p24h002.nd2	15.52	15.5	0.87	0	0	0
134	25do p24h002.nd2	20.73	20.72	0.67	0	0	0
135	25do p24h002.nd2	10.6	10.57	0.73	0	0	0
136	25do p24h002.nd2	5.13	5.08	0.74	0	0	0
137	25do p24h002.nd2	8.76	8.73	0.72	0	0	0
138	25do p24h002.nd2	1.5	1.5	0.002	0	0	0
139	25do p24h002.nd2	8.67	8.67	0.01	0	0	0
140	25do p24h002.nd2	4.1	4.03	0.76	0	0	0
141	25do p24h002.nd2	1.12	0.86	0.71	0	0	0
Feature	Mean	St.Dev	Minimum	Maximum
Length xyz	7.8	7.74	0	39.58
Length xy	7.53	7.77	0	39.5
Height	1.23	1.42	0	5.96
Item	Source	Length xyz	Length xy	Height	ND.T	ND.Z	ND.M	Comment
1	25do p24h002.nd2	3.44	3.41	0.4	0	0	0
2	25do p24h002.nd2	0.4	0.4	0.0005	0	0	0
3	25do p24h002.nd2	12.81	12.81	0.003	0	0	0
4	25do p24h002.nd2	13.46	13.44	0.79	0	0	0
5	25do p24h002.nd2	1.84	1.67	0.78	0	0	0
6	25do p24h002.nd2	2.64	2.53	0.76	0	0	0
7	25do p24h002.nd2	5.1	5.05	0.74	0	0	0
8	25do p24h002.nd2	3.17	2.81	1.48	0	0	0
9	25do p24h002.nd2	4.67	4.61	0.74	0	0	0
10	25do p24h002.nd2	10.54	10.44	1.47	0	0	0
11	25do p24h002.nd2	5.02	5.02	0.02	0	0	0
12	25do p24h002.nd2	10.49	10.46	0.78	0	0	0
13	25do p24h002.nd2	4.75	4.24	2.13	0	0	0
14	25do p24h002.nd2	7.76	7.44	2.18	0	0	0
15	25do p24h002.nd2	11.79	11.7	1.46	0	0	0
16	25do p24h002.nd2	13	12.98	0.72	0	0	0
17	25do p24h002.nd2	24.07	24.07	0.59	0	0	0
18	25do p24h002.nd2	11	11	0.02	0	0	0
19	25do p24h002.nd2	6.59	6.56	0.56	0	0	0
20	25do p24h002.nd2	22.07	22.04	1.11	0	0	0
21	25do p24h002.nd2	14.37	14.32	1.13	0	0	0
22	25do p24h002.nd2	2.48	2.48	0.02	0	0	0
23	25do p24h002.nd2	2.62	2.48	0.86	0	0	0
24	25do p24h002.nd2	2.89	2.89	0.03	0	0	0
25	25do p24h002.nd2	0.49	0.49	0.002	0	0	0
26	25do p24h002.nd2	3.33	3.2	0.9	0	0	0
27	25do p24h002.nd2	0	0	0	0	0	0
28	25do p24h002.nd2	15.4	15.37	0.82	0	0	0
29	25do p24h002.nd2	0	0	0	0	0	0
30	25do p24h002.nd2	2.04	2.04	0	0	0	0
31	25do p24h002.nd2	6.35	6.09	1.81	0	0	0
32	25do p24h002.nd2	2.84	2.84	0	0	0	0
33	25do p24h002.nd2	2.29	2.29	0	0	0	0
34	25do p24h002.nd2	5.27	5.27	0	0	0	0
35	25do p24h002.nd2	0	0	0	0	0	0
36	25do p24h002.nd2	9.25	9.21	0.88	0	0	0
37	25do p24h002.nd2	11.34	11.3	0.89	0	0	0
38	25do p24h002.nd2	1.2	0.81	0.87	0	0	0
39	25do p24h002.nd2	8	7.22	3.45	0	0	0
40	25do p24h002.nd2	36.07	36.07	0.15	0	0	0
41	25do p24h002.nd2	8.63	8.63	0.04	0	0	0
42	25do p24h002.nd2	0	0	0	0	0	0
43	25do p24h002.nd2	26.37	26.16	3.3	0	0	0
44	25do p24h002.nd2	4.66	3.3	3.3	0	0	0
45	25do p24h002.nd2	13.22	12.56	4.1	0	0	0
46	25do p24h002.nd2	33.92	33.68	4.02	0	0	0
47	25do p24h002.nd2	1.15	0.86	0.77	0	0	0
48	25do p24h002.nd2	0.25	0.25	0.0004	0	0	0
49	25do p24h002.nd2	27.69	27.63	1.76	0	0	0
50	25do p24h002.nd2	26.22	26.22	0.02	0	0	0
51	25do p24h002.nd2	1.86	1.86	0	0	0	0
52	25do p24h002.nd2	1.31	1.31	0.01	0	0	0
53	25do p24h002.nd2	3.36	2.86	1.77	0	0	0
54	25do p24h002.nd2	3.87	3.43	1.78	0	0	0
55	25do p24h002.nd2	1.83	1.83	0.004	0	0	0
56	25do p24h002.nd2	13.3	13.27	0.88	0	0	0
57	25do p24h002.nd2	6.76	5.07	4.46	0	0	0
58	25do p24h002.nd2	10.44	10.44	0	0	0	0
59	25do p24h002.nd2	4.47	4.47	0	0	0	0
60	25do p24h002.nd2	8.36	8.31	0.84	0	0	0
61	25do p24h002.nd2	9.9	9.29	3.44	0	0	0
62	25do p24h002.nd2	6.71	6.49	1.71	0	0	0
63	25do p24h002.nd2	2.36	1.65	1.69	0	0	0
64	25do p24h002.nd2	13.98	13.98	0.06	0	0	0
65	25do p24h002.nd2	1.8	1.58	0.85	0	0	0
66	25do p24h002.nd2	19.83	19.67	2.55	0	0	0
67	25do p24h002.nd2	8.27	7.86	2.58	0	0	0
68	25do p24h002.nd2	0	0	0	0	0	0
69	25do p24h002.nd2	4.31	3.98	1.67	0	0	0
70	25do p24h002.nd2	8.36	7.94	2.63	0	0	0
71	25do p24h002.nd2	9.6	9.6	0	0	0	0
72	25do p24h002.nd2	1.18	1.18	0	0	0	0
73	25do p24h002.nd2	3.86	2.86	2.59	0	0	0
74	25do p24h002.nd2	1.37	1.37	0	0	0	0
75	25do p24h002.nd2	8.41	8.41	0	0	0	0
76	25do p24h002.nd2	4.94	4.94	0	0	0	0
77	25do p24h002.nd2	6.84	6.84	0	0	0	0
78	25do p24h002.nd2	1.57	1.57	0	0	0	0
79	25do p24h002.nd2	2.91	2.91	0	0	0	0
80	25do p24h002.nd2	6.48	6.41	0.9	0	0	0
81	25do p24h002.nd2	10.35	10.35	0	0	0	0
82	25do p24h002.nd2	8.35	8.35	0	0	0	0
83	25do p24h002.nd2	5.06	4.97	0.91	0	0	0
84	25do p24h002.nd2	5.12	5.12	0	0	0	0
85	25do p24h002.nd2	11.79	11.76	0.91	0	0	0
86	25do p24h002.nd2	1.15	1.15	0	0	0	0
87	25do p24h002.nd2	2.34	2.34	0	0	0	0
88	25do p24h002.nd2	1.33	1.33	0	0	0	0
89	25do p24h002.nd2	2.08	2.08	0	0	0	0
90	25do p24h002.nd2	1.44	1.44	0	0	0	0
91	25do p24h002.nd2	1.44	1.44	0	0	0	0
92	25do p24h002.nd2	2.16	2.16	0	0	0	0
93	25do p24h002.nd2	16.43	16.4	0.93	0	0	0
94	25do p24h002.nd2	17.08	17.08	0.002	0	0	0
95	25do p24h002.nd2	13.49	13.49	0.01	0	0	0
96	25do p24h002.nd2	4.47	4.38	0.91	0	0	0
97	25do p24h002.nd2	0.95	0.95	0.002	0	0	0
98	25do p24h002.nd2	0	0	0	0	0	0
99	25do p24h002.nd2	2.55	1.82	1.79	0	0	0
100	25do p24h002.nd2	16.96	16.96	0	0	0	0
101	25do p24h002.nd2	0	0	0	0	0	0
102	25do p24h002.nd2	14.24	14.22	0.87	0	0	0
103	25do p24h002.nd2	10.9	10.87	0.85	0	0	0
104	25do p24h002.nd2	1.13	0.73	0.87	0	0	0
105	25do p24h002.nd2	9.46	9.42	0.88	0	0	0
106	25do p24h002.nd2	4.77	4.69	0.88	0	0	0
107	25do p24h002.nd2	13.61	13.61	0	0	0	0
108	25do p24h002.nd2	9.2	8.8	2.67	0	0	0
109	25do p24h002.nd2	3.62	2.44	2.67	0	0	0
110	25do p24h002.nd2	2.23	1.34	1.78	0	0	0
111	25do p24h002.nd2	2.43	1.64	1.79	0	0	0
112	25do p24h002.nd2	5.2	5.2	0	0	0	0
113	25do p24h002.nd2	3.77	2.38	2.92	0	0	0
114	25do p24h002.nd2	25.76	25.75	0.8	0	0	0
115	25do p24h002.nd2	28.14	27.12	7.49	0	0	0
116	25do p24h002.nd2	10.01	9.35	3.57	0	0	0
117	25do p24h002.nd2	7.53	7.49	0.82	0	0	0
118	25do p24h002.nd2	30.9	30.31	6.01	0	0	0
119	25do p24h002.nd2	14.35	14.32	0.87	0	0	0
120	25do p24h002.nd2	15.41	15.22	2.38	0	0	0
121	25do p24h002.nd2	7.67	7.51	1.56	0	0	0
122	25do p24h002.nd2	8.88	8.76	1.41	0	0	0
123	25do p24h002.nd2	28.81	28.74	1.92	0	0	0
124	25do p24h002.nd2	5.93	5.93	0.06	0	0	0
125	25do p24h002.nd2	7.65	7.65	0.02	0	0	0
126	25do p24h002.nd2	4.28	4.19	0.9	0	0	0
127	25do p24h002.nd2	4.41	4.32	0.9	0	0	0
128	25do p24h002.nd2	2.96	1.33	2.65	0	0	0
129	25do p24h002.nd2	5.9	5.62	1.79	0	0	0
130	25do p24h002.nd2	5.3	5.3	0.03	0	0	0
131	25do p24h002.nd2	6.22	6.15	0.91	0	0	0
132	25do p24h002.nd2	0	0	0	0	0	0
133	25do p24h002.nd2	2.82	2.68	0.88	0	0	0
134	25do p24h002.nd2	8.31	8.11	1.79	0	0	0
135	25do p24h002.nd2	3.47	2.24	2.65	0	0	0
136	25do p24h002.nd2	1.85	1.63	0.89	0	0	0
137	25do p24h002.nd2	12.92	12.83	1.53	0	0	0
Feature	Mean	St.Dev	Minimum	Maximum
Length xyz	7.85	7.6	0	36.07
Length xy	7.66	7.62	0	36.07
Height	1.02	1.27	0	7.49

## Sheet: Fmi gogoΔC
Item	Source	Length xyz	Length xy	Height	ND.T	ND.Z	ND.M	Comment
1	25do p24h.nd2	17.91	17.77	2.2	0	0	0
2	25do p24h.nd2	17.71	17.57	2.28	0	0	0					length	sample1	sample2	sample3	sample4	total
3	25do p24h.nd2	15.88	15.38	3.94	0	0	0					5	42	36	33	42	153
4	25do p24h.nd2	15.31	15.29	0.76	0	0	0					15	83	78	75	75	311
5	25do p24h.nd2	7.99	7.39	3.03	0	0	0					25	16	28	23	26	93
6	25do p24h.nd2	17.17	17.17	0.02	0	0	0					25~	0	5	6	4	15
7	25do p24h.nd2	11.95	11.51	3.21	0	0	0						#N/A	#N/A	#N/A	#N/A
8	25do p24h.nd2	18.59	18.45	2.3	0	0	0						#N/A	#N/A	#N/A	#N/A
9	25do p24h.nd2	13.9	13.9	0.02	0	0	0						#N/A	#N/A	#N/A	#N/A
10	25do p24h.nd2	7.9	7.23	3.17	0	0	0						#N/A	#N/A	#N/A	#N/A
11	25do p24h.nd2	16.02	15.54	3.87	0	0	0						#N/A	#N/A	#N/A	#N/A
12	25do p24h.nd2	4.22	4.14	0.8	0	0	0						#N/A	#N/A	#N/A	#N/A	#N/A
13	25do p24h.nd2	12.09	11.66	3.18	0	0	0						#N/A	#N/A	#N/A	#N/A
14	25do p24h.nd2	11.94	11.91	0.8	0	0	0						#N/A	#N/A	#N/A	#N/A
15	25do p24h.nd2	11.07	11.04	0.8	0	0	0						#N/A	#N/A	#N/A	#N/A
16	25do p24h.nd2	3.19	2.84	1.46	0	0	0						#N/A	#N/A	#N/A	#N/A
17	25do p24h.nd2	7.79	6.95	3.5	0	0	0						#N/A	#N/A	#N/A	#N/A
18	25do p24h.nd2	15.81	15.62	2.48	0	0	0
19	25do p24h.nd2	16.71	16.7	0.48	0	0	0
20	25do p24h.nd2	0	0	0	0	0	0
21	25do p24h.nd2	4.23	4.23	0.05	0	0	0
22	25do p24h.nd2	5.2	4.85	1.89	0	0	0
23	25do p24h.nd2	1.35	1.16	0.69	0	0	0
24	25do p24h.nd2	16.04	16.03	0.71	0	0	0
25	25do p24h.nd2	8.12	8	1.37	0	0	0
26	25do p24h.nd2	18.55	18.55	0.02	0	0	0
27	25do p24h.nd2	4.66	4.66	0	0	0	0
28	25do p24h.nd2	5.26	5.15	1.06	0	0	0
29	25do p24h.nd2	12.29	12.29	0.15	0	0	0
30	25do p24h.nd2	12.85	12.45	3.19	0	0	0
31	25do p24h.nd2	11.9	11.9	0.02	0	0	0
32	25do p24h.nd2	17.1	17.02	1.6	0	0	0
33	25do p24h.nd2	8.41	8.06	2.41	0	0	0
34	25do p24h.nd2	5.4	3.59	4.03	0	0	0
35	25do p24h.nd2	14.11	14.11	0	0	0	0
36	25do p24h.nd2	10.72	10.72	0.02	0	0	0
37	25do p24h.nd2	14.2	14.11	1.56	0	0	0
38	25do p24h.nd2	1.73	1.53	0.8	0	0	0
39	25do p24h.nd2	11.01	11.01	0.01	0	0	0
40	25do p24h.nd2	1.35	1.08	0.8	0	0	0
41	25do p24h.nd2	5.99	5.99	0	0	0	0
42	25do p24h.nd2	7.29	6.55	3.2	0	0	0
43	25do p24h.nd2	1.43	1.43	0	0	0	0
44	25do p24h.nd2	9.4	8.85	3.19	0	0	0
45	25do p24h.nd2	1.66	1.66	0.005	0	0	0
46	25do p24h.nd2	8.07	7.41	3.21	0	0	0
47	25do p24h.nd2	6.65	6.21	2.38	0	0	0
48	25do p24h.nd2	1.61	0.5	1.53	0	0	0
49	25do p24h.nd2	14.86	14.33	3.92	0	0	0
50	25do p24h.nd2	21.14	21.13	0.82	0	0	0
51	25do p24h.nd2	10.92	10.89	0.77	0	0	0
52	25do p24h.nd2	1.84	1.66	0.78	0	0	0
53	25do p24h.nd2	7.4	7	2.39	0	0	0
54	25do p24h.nd2	18.42	18.36	1.58	0	0	0
55	25do p24h.nd2	0	0	0	0	0	0
56	25do p24h.nd2	12.52	12.52	0	0	0	0
57	25do p24h.nd2	16.89	16.87	0.81	0	0	0
58	25do p24h.nd2	3.28	3.28	0	0	0	0
59	25do p24h.nd2	1.02	0.63	0.8	0	0	0
60	25do p24h.nd2	0	0	0	0	0	0
61	25do p24h.nd2	11.08	10.97	1.54	0	0	0
62	25do p24h.nd2	5.7	4.1	3.96	0	0	0
63	25do p24h.nd2	29.76	29.58	3.24	0	0	0
64	25do p24h.nd2	6.02	5.97	0.77	0	0	0
65	25do p24h.nd2	3.22	3.22	0	0	0	0
66	25do p24h.nd2	0.11	0.11	0.0001	0	0	0
67	25do p24h.nd2	0.82	0.16	0.81	0	0	0
68	25do p24h.nd2	0	0	0	0	0	0
69	25do p24h.nd2	0	0	0	0	0	0
70	25do p24h.nd2	11.32	11.2	1.66	0	0	0
71	25do p24h.nd2	10.61	7.58	7.43	0	0	0
72	25do p24h.nd2	2.09	2.09	0	0	0	0
73	25do p24h.nd2	7.21	7.17	0.71	0	0	0
74	25do p24h.nd2	10.44	10.44	0	0	0	0
75	25do p24h.nd2	14.06	14.04	0.72	0	0	0
76	25do p24h.nd2	11.3	11.3	0	0	0	0
77	25do p24h.nd2	7.14	6.82	2.13	0	0	0
78	25do p24h.nd2	4.04	3.97	0.74	0	0	0
79	25do p24h.nd2	0	0	0	0	0	0
80	25do p24h.nd2	12.57	12.24	2.86	0	0	0
81	25do p24h.nd2	7.74	7.74	0	0	0	0
82	25do p24h.nd2	21.06	21	1.53	0	0	0
83	25do p24h.nd2	18.86	18.85	0.78	0	0	0
84	25do p24h.nd2	4.21	4.13	0.81	0	0	0
85	25do p24h.nd2	7.5	6.3	4.07	0	0	0
86	25do p24h.nd2	0	0	0	0	0	0
87	25do p24h.nd2	17.36	15.77	7.27	0	0	0
88	25do p24h.nd2	8.97	8.93	0.81	0	0	0
89	25do p24h.nd2	23.21	22.99	3.24	0	0	0
90	25do p24h.nd2	10.15	8.95	4.8	0	0	0
91	25do p24h.nd2	4.04	0.82	3.96	0	0	0
92	25do p24h.nd2	5.64	5.64	0.002	0	0	0
93	25do p24h.nd2	3.52	2.11	2.81	0	0	0
94	25do p24h.nd2	14.57	14.01	4	0	0	0
95	25do p24h.nd2	7.4	7.01	2.37	0	0	0
96	25do p24h.nd2	4.08	2.95	2.82	0	0	0
97	25do p24h.nd2	31.2	30.69	5.61	0	0	0
98	25do p24h.nd2	1.22	0.93	0.79	0	0	0
99	25do p24h.nd2	1.98	1.58	1.2	0	0	0
100	25do p24h.nd2	6.43	4.26	4.81	0	0	0
101	25do p24h.nd2	23.49	23.28	3.14	0	0	0
102	25do p24h.nd2	10.26	10.23	0.76	0	0	0
103	25do p24h.nd2	5.21	5.21	0	0	0	0
104	25do p24h.nd2	5.95	5.5	2.26	0	0	0
105	25do p24h.nd2	3.64	3.32	1.5	0	0	0
106	25do p24h.nd2	5.29	4.77	2.28	0	0	0
107	25do p24h.nd2	7.69	7.65	0.77	0	0	0
108	25do p24h.nd2	11.03	9.6	5.44	0	0	0
109	25do p24h.nd2	11.28	11.28	0.02	0	0	0
110	25do p24h.nd2	9.31	9.04	2.23	0	0	0
111	25do p24h.nd2	6.46	6.27	1.54	0	0	0
112	25do p24h.nd2	2.72	2.62	0.75	0	0	0
113	25do p24h.nd2	9.99	9.31	3.62	0	0	0
114	25do p24h.nd2	2.97	2	2.2	0	0	0
115	25do p24h.nd2	13.62	13.6	0.77	0	0	0
116	25do p24h.nd2	14.07	12.14	7.11	0	0	0
117	25do p24h.nd2	0	0	0	0	0	0
118	25do p24h.nd2	6.79	4.58	5.01	0	0	0
119	25do p24h.nd2	13.82	13.34	3.61	0	0	0
120	25do p24h.nd2	9.8	9.57	2.11	0	0	0
121	25do p24h.nd2	1.1	1.1	0	0	0	0
122	25do p24h.nd2	4.03	2.7	2.99	0	0	0
123	25do p24h.nd2	0	0	0	0	0	0
124	25do p24h.nd2	7.49	7.34	1.45	0	0	0
125	25do p24h.nd2	7.2	7.16	0.77	0	0	0
126	25do p24h.nd2	0	0	0	0	0	0
127	25do p24h.nd2	20.12	19.91	2.87	0	0	0
128	25do p24h.nd2	1.98	1.85	0.72	0	0	0
129	25do p24h.nd2	37.33	37.32	0.7	0	0	0
130	25do p24h.nd2	6.2	6.15	0.79	0	0	0
131	25do p24h.nd2	11.48	10.45	4.77	0	0	0
132	25do p24h.nd2	26.1	26.05	1.64	0	0	0
133	25do p24h.nd2	7.94	6.88	3.98	0	0	0
134	25do p24h.nd2	12.33	12.1	2.37	0	0	0
135	25do p24h.nd2	1.02	0.63	0.8	0	0	0
136	25do p24h.nd2	14.79	14.77	0.83	0	0	0
137	25do p24h.nd2	0	0	0	0	0	0
138	25do p24h.nd2	8.72	8.44	2.2	0	0	0
139	25do p24h.nd2	14.03	14.01	0.71	0	0	0
140	25do p24h.nd2	10.29	9.84	3.03	0	0	0
141	25do p24h.nd2	6.52	6.13	2.22	0	0	0
142	25do p24h.nd2	7.21	7.06	1.45	0	0	0
143	25do p24h.nd2	23.17	23.13	1.43	0	0	0
144	25do p24h.nd2	18.14	18.08	1.42	0	0	0
145	25do p24h.nd2	15.84	15.77	1.48	0	0	0
146	25do p24h.nd2	20.49	20.48	0.71	0	0	0
147	25do p24h.nd2	20.97	20.93	1.39	0	0	0
Feature	Mean	St.Dev	Minimum	Maximum
Length xyz	9.54	7.08	0	37.33
Length xy	9.19	7.16	0	37.32
Height	1.69	1.64	0	7.43
Item	Source	Length xyz	Length xy	Height	ND.T	ND.Z	ND.M	Comment
1	25do p24h.nd2	20.21	19.86	3.76	0	0	0
2	25do p24h.nd2	8.78	6.89	5.43	0	0	0
3	25do p24h.nd2	9.83	9.8	0.75	0	0	0
4	25do p24h.nd2	3.03	3.03	0.003	0	0	0
5	25do p24h.nd2	2.9	2.49	1.5	0	0	0
6	25do p24h.nd2	14.17	13.86	2.96	0	0	0
7	25do p24h.nd2	20.24	19.91	3.6	0	0	0
8	25do p24h.nd2	5.57	4.74	2.93	0	0	0
9	25do p24h.nd2	1.87	1.87	0.003	0	0	0
10	25do p24h.nd2	0	0	0	0	0	0
11	25do p24h.nd2	2.58	2.58	0.004	0	0	0
12	25do p24h.nd2	8	7.9	1.28	0	0	0
13	25do p24h.nd2	6.09	5.97	1.17	0	0	0
14	25do p24h.nd2	0	0	0	0	0	0
15	25do p24h.nd2	1.37	1.25	0.56	0	0	0
16	25do p24h.nd2	8.04	7.96	1.1	0	0	0
17	25do p24h.nd2	8.01	7.93	1.14	0	0	0
18	25do p24h.nd2	11.44	11.19	2.37	0	0	0
19	25do p24h.nd2	7.93	7.93	0.11	0	0	0
20	25do p24h.nd2	14.2	13.9	2.91	0	0	0
21	25do p24h.nd2	15.51	14.99	4.01	0	0	0
22	25do p24h.nd2	23.91	23.91	0.22	0	0	0
23	25do p24h.nd2	6.23	5.89	2.03	0	0	0
24	25do p24h.nd2	9.04	9.04	0	0	0	0
25	25do p24h.nd2	12.24	11.91	2.84	0	0	0
26	25do p24h.nd2	7.57	6.65	3.61	0	0	0
27	25do p24h.nd2	11.97	11.6	2.97	0	0	0
28	25do p24h.nd2	3.33	3.33	0.003	0	0	0
29	25do p24h.nd2	6.25	5.44	3.07	0	0	0
30	25do p24h.nd2	0.15	0.15	0.001	0	0	0
31	25do p24h.nd2	0	0	0	0	0	0
32	25do p24h.nd2	4.85	4.85	0	0	0	0
33	25do p24h.nd2	16.33	16.33	0	0	0	0
34	25do p24h.nd2	6.33	6.28	0.76	0	0	0
35	25do p24h.nd2	8.76	8.73	0.75	0	0	0
36	25do p24h.nd2	1.63	1.45	0.75	0	0	0
37	25do p24h.nd2	10.61	10.58	0.72	0	0	0
38	25do p24h.nd2	13.71	13.54	2.15	0	0	0
39	25do p24h.nd2	1.43	1.43	0	0	0	0
40	25do p24h.nd2	13.98	13.98	0	0	0	0
41	25do p24h.nd2	5.85	5.67	1.41	0	0	0
42	25do p24h.nd2	1.43	1.43	0	0	0	0
43	25do p24h.nd2	11.42	11.42	0	0	0	0
44	25do p24h.nd2	6.09	6.05	0.7	0	0	0
45	25do p24h.nd2	3.25	1.82	2.7	0	0	0
46	25do p24h.nd2	10.52	10.43	1.41	0	0	0
47	25do p24h.nd2	4.36	4.31	0.67	0	0	0
48	25do p24h.nd2	8.17	7.89	2.14	0	0	0
49	25do p24h.nd2	7.27	7.23	0.7	0	0	0
50	25do p24h.nd2	1.82	1.2	1.37	0	0	0
51	25do p24h.nd2	6.27	5.93	2.03	0	0	0
52	25do p24h.nd2	10.08	9.99	1.34	0	0	0
53	25do p24h.nd2	0	0	0	0	0	0
54	25do p24h.nd2	8.86	8.41	2.78	0	0	0
55	25do p24h.nd2	22.12	21.79	3.77	0	0	0
56	25do p24h.nd2	7.45	6.25	4.05	0	0	0
57	25do p24h.nd2	5.2	4.75	2.1	0	0	0
58	25do p24h.nd2	8.6	8.32	2.19	0	0	0
59	25do p24h.nd2	6.79	6.79	0	0	0	0
60	25do p24h.nd2	20.26	19.69	4.79	0	0	0
61	25do p24h.nd2	6.71	6.67	0.72	0	0	0
62	25do p24h.nd2	7.32	7.04	2	0	0	0
63	25do p24h.nd2	13.54	13.54	1e-05	0	0	0
64	25do p24h.nd2	16.21	15.99	2.67	0	0	0
65	25do p24h.nd2	3.85	3.85	0	0	0	0
66	25do p24h.nd2	2.09	1.98	0.69	0	0	0
67	25do p24h.nd2	10.02	9.92	1.39	0	0	0
68	25do p24h.nd2	6.74	6.7	0.71	0	0	0
69	25do p24h.nd2	3.53	3.53	0	0	0	0
70	25do p24h.nd2	20.37	20.32	1.4	0	0	0
71	25do p24h.nd2	12.22	12.22	0.08	0	0	0
72	25do p24h.nd2	19.52	19.52	0	0	0	0
73	25do p24h.nd2	0	0	0	0	0	0
74	25do p24h.nd2	5.16	5.1	0.8	0	0	0
75	25do p24h.nd2	4.81	4.75	0.79	0	0	0
76	25do p24h.nd2	6.26	6.21	0.77	0	0	0
77	25do p24h.nd2	6.21	6.21	0.02	0	0	0
78	25do p24h.nd2	9.22	9.22	0.01	0	0	0
79	25do p24h.nd2	1.84	1.66	0.78	0	0	0
80	25do p24h.nd2	10.27	10.24	0.79	0	0	0
81	25do p24h.nd2	7.66	7.66	0	0	0	0
82	25do p24h.nd2	2.83	2.83	0	0	0	0
83	25do p24h.nd2	12.93	12.93	0	0	0	0
84	25do p24h.nd2	7.76	7.61	1.49	0	0	0
85	25do p24h.nd2	7.79	7.64	1.49	0	0	0
86	25do p24h.nd2	7.46	7.42	0.74	0	0	0
87	25do p24h.nd2	32.03	31.89	2.92	0	0	0
88	25do p24h.nd2	14.81	14.13	4.41	0	0	0
89	25do p24h.nd2	24.6	24.5	2.11	0	0	0
90	25do p24h.nd2	16.22	16.16	1.35	0	0	0
91	25do p24h.nd2	9.15	7.95	4.53	0	0	0
92	25do p24h.nd2	5.68	5.68	0.01	0	0	0
93	25do p24h.nd2	8.74	8.72	0.65	0	0	0
94	25do p24h.nd2	14.97	14.49	3.75	0	0	0
95	25do p24h.nd2	27.78	27.76	0.97	0	0	0
96	25do p24h.nd2	12.88	12.86	0.77	0	0	0
97	25do p24h.nd2	13.14	11.81	5.75	0	0	0
98	25do p24h.nd2	17.8	17.74	1.48	0	0	0
99	25do p24h.nd2	18.58	18.57	0.84	0	0	0
100	25do p24h.nd2	14.22	14.1	1.87	0	0	0
101	25do p24h.nd2	16.95	16.95	1e-05	0	0	0
102	25do p24h.nd2	4.83	4.78	0.68	0	0	0
103	25do p24h.nd2	1.03	0.75	0.7	0	0	0
104	25do p24h.nd2	28.25	27.82	4.87	0	0	0
105	25do p24h.nd2	31.98	31.95	1.15	0	0	0
106	25do p24h.nd2	21.43	21.34	1.97	0	0	0
107	25do p24h.nd2	17.51	17.44	1.64	0	0	0
108	25do p24h.nd2	17.28	17.13	2.26	0	0	0
109	25do p24h.nd2	3.1	0.82	2.99	0	0	0
110	25do p24h.nd2	6.21	2.54	5.67	0	0	0
111	25do p24h.nd2	10.89	10.87	0.57	0	0	0
112	25do p24h.nd2	9.33	6.8	6.38	0	0	0
113	25do p24h.nd2	9.43	9.43	0	0	0	0
114	25do p24h.nd2	13.68	13.39	2.76	0	0	0
115	25do p24h.nd2	0.14	0.14	0	0	0	0
116	25do p24h.nd2	5.87	4.7	3.5	0	0	0
117	25do p24h.nd2	29.81	29.51	4.21	0	0	0
118	25do p24h.nd2	11.91	11.36	3.58	0	0	0
119	25do p24h.nd2	24.64	24.44	3.13	0	0	0
120	25do p24h.nd2	4.37	4.06	1.61	0	0	0
121	25do p24h.nd2	11.96	11.85	1.6	0	0	0
122	25do p24h.nd2	14.81	14.72	1.59	0	0	0
123	25do p24h.nd2	0	0	0	0	0	0
124	25do p24h.nd2	6.63	6.63	0.003	0	0	0
125	25do p24h.nd2	16.19	16.19	0.01	0	0	0
126	25do p24h.nd2	7.24	7.24	0.002	0	0	0
127	25do p24h.nd2	15.64	15.13	3.97	0	0	0
128	25do p24h.nd2	5.01	4.44	2.33	0	0	0
129	25do p24h.nd2	22.44	22.32	2.26	0	0	0
130	25do p24h.nd2	8.95	8.95	0.01	0	0	0
131	25do p24h.nd2	0.41	0.41	0.0008	0	0	0
132	25do p24h.nd2	3.02	3.02	0.005	0	0	0
133	25do p24h.nd2	29.32	28.85	5.24	0	0	0
134	25do p24h.nd2	13.6	12.93	4.24	0	0	0
135	25do p24h.nd2	16.44	16.26	2.38	0	0	0
136	25do p24h.nd2	13.43	13.42	0.52	0	0	0
137	25do p24h.nd2	9.7	9.7	0.02	0	0	0
Feature	Mean	St.Dev	Minimum	Maximum
Length xyz	10.15	7.3	0	32.03
Length xy	9.88	7.33	0	31.95
Height	1.53	1.57	0	6.38
Item	Source	Length xyz	Length xy	Height	ND.T	ND.Z	ND.M	Comment
1	25do p24h.nd2	6.24	6.24	0	0	0	0
2	25do p24h.nd2	6.11	5.28	3.07	0	0	0
3	25do p24h.nd2	7.32	7.16	1.55	0	0	0
4	25do p24h.nd2	3.2	2.19	2.34	0	0	0
5	25do p24h.nd2	6.68	6.25	2.36	0	0	0
6	25do p24h.nd2	7.85	6.25	4.74	0	0	0
7	25do p24h.nd2	17.25	16.96	3.16	0	0	0
8	25do p24h.nd2	15.31	15.29	0.78	0	0	0
9	25do p24h.nd2	8.32	6.8	4.79	0	0	0
10	25do p24h.nd2	16	15.81	2.4	0	0	0
11	25do p24h.nd2	11.12	10.02	4.82	0	0	0
12	25do p24h.nd2	4.78	4.71	0.8	0	0	0
13	25do p24h.nd2	14.8	14.71	1.62	0	0	0
14	25do p24h.nd2	5.44	5.38	0.81	0	0	0
15	25do p24h.nd2	5.04	4.98	0.81	0	0	0
16	25do p24h.nd2	6.31	6.26	0.81	0	0	0
17	25do p24h.nd2	5.82	5.82	0	0	0	0
18	25do p24h.nd2	0	0	0	0	0	0
19	25do p24h.nd2	0.52	0.52	0	0	0	0
20	25do p24h.nd2	11.29	11.17	1.6	0	0	0
21	25do p24h.nd2	24.2	24.2	0.02	0	0	0
22	25do p24h.nd2	11.96	11.86	1.59	0	0	0
23	25do p24h.nd2	31.71	31.62	2.4	0	0	0
24	25do p24h.nd2	52.42	52.42	0.004	0	0	0
25	25do p24h.nd2	15.6	15.6	0.02	0	0	0
26	25do p24h.nd2	11.59	11.59	0.02	0	0	0
27	25do p24h.nd2	4.46	4.4	0.73	0	0	0
28	25do p24h.nd2	29.51	28.22	8.63	0	0	0
29	25do p24h.nd2	1.72	1.72	0	0	0	0
30	25do p24h.nd2	4.3	3.99	1.6	0	0	0
31	25do p24h.nd2	4.3	4	1.58	0	0	0
32	25do p24h.nd2	9.67	9.67	0	0	0	0
33	25do p24h.nd2	7.81	7.77	0.82	0	0	0
34	25do p24h.nd2	19.62	19.56	1.55	0	0	0
35	25do p24h.nd2	10.44	10.33	1.51	0	0	0
36	25do p24h.nd2	15.8	15.73	1.51	0	0	0
37	25do p24h.nd2	20.37	20.23	2.36	0	0	0
38	25do p24h.nd2	12.29	12.29	0	0	0	0
39	25do p24h.nd2	3.31	3.31	0	0	0	0
40	25do p24h.nd2	2.21	2.21	0	0	0	0
41	25do p24h.nd2	13.48	13.27	2.39	0	0	0
42	25do p24h.nd2	13.07	12.97	1.61	0	0	0
43	25do p24h.nd2	16.5	16	4	0	0	0
44	25do p24h.nd2	14.74	13.3	6.35	0	0	0
45	25do p24h.nd2	11.87	10.06	6.29	0	0	0
46	25do p24h.nd2	5.55	5.55	0	0	0	0
47	25do p24h.nd2	19.28	18.83	4.13	0	0	0
48	25do p24h.nd2	10.45	10.22	2.17	0	0	0
49	25do p24h.nd2	9.54	6.48	7	0	0	0
50	25do p24h.nd2	12.93	9.57	8.7	0	0	0
51	25do p24h.nd2	11.36	11.28	1.34	0	0	0
52	25do p24h.nd2	17.71	17.61	1.89	0	0	0
53	25do p24h.nd2	17.1	17.09	0.59	0	0	0
54	25do p24h.nd2	6.82	6.47	2.15	0	0	0
55	25do p24h.nd2	4.11	3.18	2.62	0	0	0
56	25do p24h.nd2	12.62	12.37	2.5	0	0	0
57	25do p24h.nd2	8.88	8.29	3.19	0	0	0
58	25do p24h.nd2	5.03	3.33	3.77	0	0	0
59	25do p24h.nd2	6.09	5.83	1.77	0	0	0
60	25do p24h.nd2	2.74	1.99	1.89	0	0	0
61	25do p24h.nd2	9.5	5.95	7.41	0	0	0
62	25do p24h.nd2	5.51	3.91	3.88	0	0	0
63	25do p24h.nd2	6.25	5.17	3.51	0	0	0
64	25do p24h.nd2	12.35	9.66	7.69	0	0	0
65	25do p24h.nd2	0	0	0	0	0	0
66	25do p24h.nd2	16.44	16.42	0.84	0	0	0
67	25do p24h.nd2	11.48	11.05	3.09	0	0	0
68	25do p24h.nd2	10.82	10.37	3.08	0	0	0
69	25do p24h.nd2	14.56	14.53	0.81	0	0	0
70	25do p24h.nd2	0	0	0	0	0	0
71	25do p24h.nd2	15.12	14.36	4.74	0	0	0
72	25do p24h.nd2	14.28	14.2	1.49	0	0	0
73	25do p24h.nd2	2.14	2.14	0.02	0	0	0
74	25do p24h.nd2	19.31	19.3	0.57	0	0	0
75	25do p24h.nd2	19.51	18.48	6.24	0	0	0
76	25do p24h.nd2	15.18	13.32	7.28	0	0	0
77	25do p24h.nd2	15.82	15.81	0.64	0	0	0
78	25do p24h.nd2	7.91	7.6	2.22	0	0	0
79	25do p24h.nd2	8.3	7.74	2.99	0	0	0
80	25do p24h.nd2	7.91	7.76	1.51	0	0	0
81	25do p24h.nd2	5.99	5.79	1.54	0	0	0
82	25do p24h.nd2	3.56	3.47	0.78	0	0	0
83	25do p24h.nd2	8.84	7.46	4.74	0	0	0
84	25do p24h.nd2	0	0	0	0	0	0
85	25do p24h.nd2	2.71	2.59	0.79	0	0	0
86	25do p24h.nd2	3.3	3.3	0	0	0	0
87	25do p24h.nd2	3.12	1.36	2.81	0	0	0
88	25do p24h.nd2	8.43	8.43	0	0	0	0
89	25do p24h.nd2	14.3	14.12	2.22	0	0	0
90	25do p24h.nd2	0	0	0	0	0	0
91	25do p24h.nd2	0	0	0	0	0	0
92	25do p24h.nd2	0	0	0	0	0	0
93	25do p24h.nd2	13.22	11.17	7.08	0	0	0
94	25do p24h.nd2	16.77	15.55	6.27	0	0	0
95	25do p24h.nd2	10.23	10.1	1.62	0	0	0
96	25do p24h.nd2	0	0	0	0	0	0
97	25do p24h.nd2	11.16	11.13	0.8	0	0	0
98	25do p24h.nd2	12.85	11.54	5.65	0	0	0
99	25do p24h.nd2	10.02	9.19	3.99	0	0	0
100	25do p24h.nd2	7.2	7.02	1.6	0	0	0
101	25do p24h.nd2	7.92	7.75	1.61	0	0	0
102	25do p24h.nd2	8.73	8.61	1.46	0	0	0
103	25do p24h.nd2	11.16	11.16	0	0	0	0
104	25do p24h.nd2	22.84	22.83	0.77	0	0	0
105	25do p24h.nd2	7.69	7.34	2.3	0	0	0
106	25do p24h.nd2	6.85	6.85	0	0	0	0
107	25do p24h.nd2	11.3	11.3	0	0	0	0
108	25do p24h.nd2	0	0	0	0	0	0
109	25do p24h.nd2	8.23	8.09	1.53	0	0	0
110	25do p24h.nd2	24.85	24.73	2.34	0	0	0
111	25do p24h.nd2	8.85	8.85	0	0	0	0
112	25do p24h.nd2	0	0	0	0	0	0
113	25do p24h.nd2	15.85	15.85	0	0	0	0
114	25do p24h.nd2	8.46	8.42	0.79	0	0	0
115	25do p24h.nd2	9.49	8.57	4.06	0	0	0
116	25do p24h.nd2	7.1	4.37	5.61	0	0	0
117	25do p24h.nd2	7.87	7.87	0	0	0	0
118	25do p24h.nd2	0	0	0	0	0	0
119	25do p24h.nd2	4.47	3.14	3.18	0	0	0
120	25do p24h.nd2	0	0	0	0	0	0
121	25do p24h.nd2	0	0	0	0	0	0
122	25do p24h.nd2	12.81	12.43	3.1	0	0	0
123	25do p24h.nd2	0.53	0.53	0.001	0	0	0
124	25do p24h.nd2	0	0	0	0	0	0
125	25do p24h.nd2	16.69	13.38	9.98	0	0	0
126	25do p24h.nd2	26.87	25.77	7.6	0	0	0
127	25do p24h.nd2	11.01	10.98	0.78	0	0	0
128	25do p24h.nd2	0.52	0.52	0.003	0	0	0
129	25do p24h.nd2	13.34	13.25	1.57	0	0	0
130	25do p24h.nd2	39.34	39.34	0.67	0	0	0
131	25do p24h.nd2	13.25	12.89	3.06	0	0	0
132	25do p24h.nd2	16.18	16.17	0.43	0	0	0
133	25do p24h.nd2	4.58	4.05	2.13	0	0	0
134	25do p24h.nd2	16.9	16.9	0.51	0	0	0
135	25do p24h.nd2	4.05	3.97	0.8	0	0	0
136	25do p24h.nd2	17.17	16.89	3.1	0	0	0
137	25do p24h.nd2	7.95	7.91	0.76	0	0	0
138	25do p24h.nd2	5.37	5.37	0	0	0	0
139	25do p24h.nd2	15.78	15.78	0	0	0	0
140	25do p24h.nd2	16.16	16.16	1e-05	0	0	0
141	25do p24h.nd2	7.86	7.85	0.41	0	0	0
142	25do p24h.nd2	2.03	1.28	1.58	0	0	0
143	25do p24h.nd2	11.32	11.21	1.52	0	0	0
144	25do p24h.nd2	9.21	9.21	0	0	0	0
145	25do p24h.nd2	12.32	9	8.41	0	0	0
146	25do p24h.nd2	12.57	12.34	2.38	0	0	0
147	25do p24h.nd2	14.91	14.36	4.01	0	0	0
Feature	Mean	St.Dev	Minimum	Maximum
Length xyz	10.18	7.72	0	52.42
Length xy	9.72	7.71	0	52.42
Height	2.04	2.27	0	9.98
Item	Source	Length xyz	Length xy	Height	ND.T	ND.Z	ND.M	Comment
1	25do p24h.nd2	9.18	9.15	0.79	0	0	0
2	25do p24h.nd2	8.25	8.22	0.79	0	0	0
3	25do p24h.nd2	8.02	8.02	0.01	0	0	0
4	25do p24h.nd2	5.23	5.23	0.005	0	0	0
5	25do p24h.nd2	2.66	1.2	2.38	0	0	0
6	25do p24h.nd2	4.09	1.08	3.95	0	0	0
7	25do p24h.nd2	10.35	9.58	3.92	0	0	0
8	25do p24h.nd2	16.79	16.62	2.41	0	0	0
9	25do p24h.nd2	7.78	7.62	1.59	0	0	0
10	25do p24h.nd2	0	0	0	0	0	0
11	25do p24h.nd2	3.26	3.17	0.77	0	0	0
12	25do p24h.nd2	13.24	13.14	1.57	0	0	0
13	25do p24h.nd2	12.34	12.24	1.56	0	0	0
14	25do p24h.nd2	3.7	3.7	0.03	0	0	0
15	25do p24h.nd2	24.49	24.43	1.63	0	0	0
16	25do p24h.nd2	15.57	15.55	0.77	0	0	0
17	25do p24h.nd2	19.03	18.97	1.39	0	0	0
18	25do p24h.nd2	20.18	19.6	4.81	0	0	0
19	25do p24h.nd2	11.54	11.54	0.02	0	0	0
20	25do p24h.nd2	20.66	19.65	6.38	0	0	0
21	25do p24h.nd2	6.25	6.06	1.53	0	0	0
22	25do p24h.nd2	7.94	3.79	6.97	0	0	0
23	25do p24h.nd2	11.15	10.71	3.12	0	0	0
24	25do p24h.nd2	3.73	3.4	1.54	0	0	0
25	25do p24h.nd2	7.49	5.95	4.56	0	0	0
26	25do p24h.nd2	13.47	13.45	0.74	0	0	0
27	25do p24h.nd2	0	0	0	0	0	0
28	25do p24h.nd2	7.5	7.34	1.52	0	0	0
29	25do p24h.nd2	10.38	10.02	2.72	0	0	0
30	25do p24h.nd2	6.16	3.06	5.34	0	0	0
31	25do p24h.nd2	7.85	7.85	0	0	0	0
32	25do p24h.nd2	8.94	5.75	6.85	0	0	0
33	25do p24h.nd2	8.48	8.48	0	0	0	0
34	25do p24h.nd2	11.03	10.42	3.64	0	0	0
35	25do p24h.nd2	5.03	4.97	0.75	0	0	0
36	25do p24h.nd2	19.41	18.48	5.91	0	0	0
37	25do p24h.nd2	9.49	8.83	3.46	0	0	0
38	25do p24h.nd2	3.15	2.94	1.12	0	0	0
39	25do p24h.nd2	9.7	9.47	2.09	0	0	0
40	25do p24h.nd2	14	13.93	1.36	0	0	0
41	25do p24h.nd2	12.5	10.9	6.13	0	0	0
42	25do p24h.nd2	18.1	17.32	5.24	0	0	0
43	25do p24h.nd2	12.61	11.78	4.51	0	0	0
44	25do p24h.nd2	10.23	8.7	5.38	0	0	0
45	25do p24h.nd2	7.14	6.43	3.12	0	0	0
46	25do p24h.nd2	9.82	9.7	1.56	0	0	0
47	25do p24h.nd2	1.35	1.09	0.79	0	0	0
48	25do p24h.nd2	4.54	4.25	1.61	0	0	0
49	25do p24h.nd2	14.14	14.12	0.83	0	0	0
50	25do p24h.nd2	13.85	11.82	7.21	0	0	0
51	25do p24h.nd2	6.4	6.34	0.81	0	0	0
52	25do p24h.nd2	1.92	1.92	0.0003	0	0	0
53	25do p24h.nd2	1.08	0.71	0.81	0	0	0
54	25do p24h.nd2	0.41	0.01	0.41	0	0	0
55	25do p24h.nd2	4.66	3.97	2.44	0	0	0
56	25do p24h.nd2	11.43	11.32	1.62	0	0	0
57	25do p24h.nd2	2.07	1.91	0.8	0	0	0
58	25do p24h.nd2	14.3	14.09	2.43	0	0	0
59	25do p24h.nd2	0	0	0	0	0	0
60	25do p24h.nd2	6.06	6	0.81	0	0	0
61	25do p24h.nd2	13.26	13.23	0.82	0	0	0
62	25do p24h.nd2	2.14	1.41	1.61	0	0	0
63	25do p24h.nd2	11.33	9.35	6.39	0	0	0
64	25do p24h.nd2	4.72	4.45	1.58	0	0	0
65	25do p24h.nd2	0	0	0	0	0	0
66	25do p24h.nd2	16.46	16.39	1.51	0	0	0
67	25do p24h.nd2	4.95	4.9	0.76	0	0	0
68	25do p24h.nd2	11.47	11.47	0.02	0	0	0
69	25do p24h.nd2	9.07	8.29	3.68	0	0	0
70	25do p24h.nd2	9.63	9.38	2.16	0	0	0
71	25do p24h.nd2	9.13	7.63	5.01	0	0	0
72	25do p24h.nd2	8.89	6.85	5.66	0	0	0
73	25do p24h.nd2	7.87	7.76	1.3	0	0	0
74	25do p24h.nd2	0	0	0	0	0	0
75	25do p24h.nd2	8.34	1.67	8.17	0	0	0
76	25do p24h.nd2	3.58	1.21	3.37	0	0	0
77	25do p24h.nd2	0	0	0	0	0	0
78	25do p24h.nd2	5.35	5.31	0.67	0	0	0
79	25do p24h.nd2	3.61	2.41	2.7	0	0	0
80	25do p24h.nd2	0	0	0	0	0	0
81	25do p24h.nd2	2.94	1.26	2.66	0	0	0
82	25do p24h.nd2	7.35	3.54	6.44	0	0	0
83	25do p24h.nd2	0.39	0.39	0.001	0	0	0
84	25do p24h.nd2	2.25	0.62	2.17	0	0	0
85	25do p24h.nd2	0.92	0.92	0	0	0	0
86	25do p24h.nd2	11.75	11.75	0	0	0	0
87	25do p24h.nd2	4.14	4.07	0.76	0	0	0
88	25do p24h.nd2	11.24	11.21	0.76	0	0	0
89	25do p24h.nd2	3.34	3.34	0	0	0	0
90	25do p24h.nd2	3.28	2.32	2.32	0	0	0
91	25do p24h.nd2	5.64	4.69	3.13	0	0	0
92	25do p24h.nd2	7.6	7.43	1.59	0	0	0
93	25do p24h.nd2	8.73	8.14	3.17	0	0	0
94	25do p24h.nd2	4.15	4.15	0.004	0	0	0
95	25do p24h.nd2	6.22	5.73	2.41	0	0	0
96	25do p24h.nd2	6.47	6.47	0.01	0	0	0
97	25do p24h.nd2	4.1	4.1	7e-05	0	0	0
98	25do p24h.nd2	5.25	4.99	1.62	0	0	0
99	25do p24h.nd2	19.99	19.93	1.64	0	0	0
100	25do p24h.nd2	9.51	9.26	2.18	0	0	0
101	25do p24h.nd2	4.07	4	0.74	0	0	0
102	25do p24h.nd2	5.55	4.7	2.96	0	0	0
103	25do p24h.nd2	8.59	8.45	1.54	0	0	0
104	25do p24h.nd2	5.22	4.99	1.53	0	0	0
105	25do p24h.nd2	8.5	8.5	0	0	0	0
106	25do p24h.nd2	6.96	5.18	4.65	0	0	0
107	25do p24h.nd2	11.77	11.77	0.17	0	0	0
108	25do p24h.nd2	14.56	14.2	3.2	0	0	0
109	25do p24h.nd2	9.83	9.81	0.67	0	0	0
110	25do p24h.nd2	16.33	16.13	2.59	0	0	0
111	25do p24h.nd2	6.43	1.95	6.13	0	0	0
112	25do p24h.nd2	7.66	7.62	0.69	0	0	0
113	25do p24h.nd2	1.62	0.81	1.4	0	0	0
114	25do p24h.nd2	20.38	20.01	3.89	0	0	0
115	25do p24h.nd2	14.39	14.39	0.19	0	0	0
116	25do p24h.nd2	4.52	2.59	3.7	0	0	0
117	25do p24h.nd2	1.62	0.54	1.53	0	0	0
118	25do p24h.nd2	8.86	4.38	7.7	0	0	0
119	25do p24h.nd2	8.61	8.61	0	0	0	0
120	25do p24h.nd2	10.9	10.78	1.62	0	0	0
121	25do p24h.nd2	21.89	21.16	5.61	0	0	0
122	25do p24h.nd2	13.91	9.93	9.74	0	0	0
123	25do p24h.nd2	9.08	9.05	0.8	0	0	0
124	25do p24h.nd2	7.65	7.27	2.37	0	0	0
125	25do p24h.nd2	6.91	6.87	0.81	0	0	0
126	25do p24h.nd2	9.19	8.34	3.87	0	0	0
127	25do p24h.nd2	17.59	17.59	0.03	0	0	0
128	25do p24h.nd2	5.79	5.79	0.003	0	0	0
129	25do p24h.nd2	4.66	4.61	0.7	0	0	0
130	25do p24h.nd2	16.41	16.41	0.04	0	0	0
131	25do p24h.nd2	12.68	12.68	0.03	0	0	0
132	25do p24h.nd2	11.41	11.29	1.65	0	0	0
133	25do p24h.nd2	11.82	11.82	0.03	0	0	0
134	25do p24h.nd2	4.39	4.39	0.01	0	0	0
135	25do p24h.nd2	12.39	11.22	5.26	0	0	0
136	25do p24h.nd2	14.12	14.05	1.34	0	0	0
137	25do p24h.nd2	1.67	1.67	0.01	0	0	0
138	25do p24h.nd2	10.45	9.56	4.21	0	0	0
139	25do p24h.nd2	0.64	0.64	0.0002	0	0	0
140	25do p24h.nd2	14.14	13.28	4.87	0	0	0
141	25do p24h.nd2	15.62	15.32	3.05	0	0	0
Feature	Mean	St.Dev	Minimum	Maximum
Length xyz	8.47	5.38	0	24.49
Length xy	7.83	5.5	0	24.43
Height	2.13	2.14	0	9.74

## Sheet: Fmi gogoFFD
Item	Source	Length xyz	Length xy	Height	ND.T	ND.Z	ND.M	Comment
1	25do p24h001.nd2	10.91	10.78	1.65	0	0	0				length	sample1	sample2	sample3	sample4	total
2	25do p24h001.nd2	6.38	4.9	4.08	0	0	0				5	62	39	39	41	181
3	25do p24h001.nd2	15.28	12.88	8.21	0	0	0				15	46	55	70	75	246
4	25do p24h001.nd2	7.75	7.73	0.62	0	0	0				25	25	32	21	21	99
5	25do p24h001.nd2	9.27	9.27	0	0	0	0				25~	12	11	14	9	46
6	25do p24h001.nd2	10.07	9.75	2.53	0	0	0					#N/A	#N/A	#N/A	#N/A
7	25do p24h001.nd2	11.66	11.64	0.71	0	0	0					#N/A	#N/A	#N/A	#N/A
8	25do p24h001.nd2	20.69	20.57	2.3	0	0	0					#N/A	#N/A	#N/A	#N/A
9	25do p24h001.nd2	9.89	9.89	0.03	0	0	0					#N/A	#N/A	#N/A	#N/A
10	25do p24h001.nd2	0	0	0	0	0	0					#N/A	#N/A	#N/A	#N/A
11	25do p24h001.nd2	7.57	7.55	0.59	0	0	0					#N/A	#N/A	#N/A	#N/A	#N/A
12	25do p24h001.nd2	5.84	5.44	2.12	0	0	0					#N/A	#N/A	#N/A	#N/A
13	25do p24h001.nd2	1.36	1.36	0	0	0	0					#N/A	#N/A	#N/A	#N/A
14	25do p24h001.nd2	1.31	1.09	0.73	0	0	0					#N/A	#N/A	#N/A	#N/A
15	25do p24h001.nd2	7.8	7.76	0.81	0	0	0					#N/A	#N/A	#N/A	#N/A
16	25do p24h001.nd2	5.14	5.14	0.04	0	0	0					#N/A	#N/A	#N/A	#N/A
17	25do p24h001.nd2	13.43	13.43	1e-05	0	0	0
18	25do p24h001.nd2	11.81	11.79	0.7	0	0	0
19	25do p24h001.nd2	5.38	5.32	0.74	0	0	0
20	25do p24h001.nd2	4.4	4.4	0.03	0	0	0
21	25do p24h001.nd2	0	0	0	0	0	0
22	25do p24h001.nd2	6.05	6.05	0	0	0	0
23	25do p24h001.nd2	17.97	17.68	3.24	0	0	0
24	25do p24h001.nd2	12.24	12.24	0.02	0	0	0
25	25do p24h001.nd2	16.01	15.98	0.84	0	0	0
26	25do p24h001.nd2	29.15	29.15	0.02	0	0	0
27	25do p24h001.nd2	39.57	39.57	0.03	0	0	0
28	25do p24h001.nd2	14.33	14.13	2.39	0	0	0
29	25do p24h001.nd2	10.6	10.6	0.02	0	0	0
30	25do p24h001.nd2	8.54	5.49	6.54	0	0	0
31	25do p24h001.nd2	0	0	0	0	0	0
32	25do p24h001.nd2	41.69	41.5	3.91	0	0	0
33	25do p24h001.nd2	14.78	14.63	2.08	0	0	0
34	25do p24h001.nd2	19.04	18.9	2.29	0	0	0
35	25do p24h001.nd2	35.33	35.33	0.24	0	0	0
36	25do p24h001.nd2	37.42	36.91	6.14	0	0	0
37	25do p24h001.nd2	9.05	7.16	5.54	0	0	0
38	25do p24h001.nd2	0	0	0	0	0	0
39	25do p24h001.nd2	0	0	0	0	0	0
40	25do p24h001.nd2	15.48	14.42	5.65	0	0	0
41	25do p24h001.nd2	10.95	10.74	2.1	0	0	0
42	25do p24h001.nd2	18.27	18.27	0.07	0	0	0
43	25do p24h001.nd2	4.13	3.55	2.12	0	0	0
44	25do p24h001.nd2	19.85	19.79	1.51	0	0	0
45	25do p24h001.nd2	12.36	12.27	1.49	0	0	0
46	25do p24h001.nd2	9.6	9.57	0.75	0	0	0
47	25do p24h001.nd2	11.02	10.91	1.51	0	0	0
48	25do p24h001.nd2	3.12	2.22	2.19	0	0	0
49	25do p24h001.nd2	7.56	7.41	1.52	0	0	0
50	25do p24h001.nd2	15.88	15.48	3.52	0	0	0
51	25do p24h001.nd2	9.03	9.03	0	0	0	0
52	25do p24h001.nd2	15.17	14.68	3.81	0	0	0
53	25do p24h001.nd2	21.42	21.37	1.45	0	0	0
54	25do p24h001.nd2	2.1	1.55	1.42	0	0	0
55	25do p24h001.nd2	0	0	0	0	0	0
56	25do p24h001.nd2	5.75	5.69	0.82	0	0	0
57	25do p24h001.nd2	0	0	0	0	0	0
58	25do p24h001.nd2	5.81	5.81	0	0	0	0
59	25do p24h001.nd2	10.14	10.11	0.8	0	0	0
60	25do p24h001.nd2	9.98	9.47	3.16	0	0	0
61	25do p24h001.nd2	4.84	4.77	0.8	0	0	0
62	25do p24h001.nd2	11.54	11.51	0.77	0	0	0
63	25do p24h001.nd2	24.37	23.74	5.48	0	0	0
64	25do p24h001.nd2	0.25	0.25	0	0	0	0
65	25do p24h001.nd2	11.55	11.43	1.62	0	0	0
66	25do p24h001.nd2	13.95	13.74	2.42	0	0	0
67	25do p24h001.nd2	15.31	14.81	3.89	0	0	0
68	25do p24h001.nd2	3.08	2.97	0.79	0	0	0
69	25do p24h001.nd2	5.82	5.78	0.67	0	0	0
70	25do p24h001.nd2	12.34	12.34	0.02	0	0	0
71	25do p24h001.nd2	10.31	10.31	0.03	0	0	0
72	25do p24h001.nd2	3.54	1.58	3.17	0	0	0
73	25do p24h001.nd2	8.57	7.94	3.2	0	0	0
74	25do p24h001.nd2	0	0	0	0	0	0
75	25do p24h001.nd2	13.97	13.97	0	0	0	0
76	25do p24h001.nd2	0.94	0.94	0	0	0	0
77	25do p24h001.nd2	14.49	14.47	0.82	0	0	0
78	25do p24h001.nd2	7.5	7.5	0	0	0	0
79	25do p24h001.nd2	9.46	9.32	1.64	0	0	0
80	25do p24h001.nd2	2.38	2.38	0.002	0	0	0
81	25do p24h001.nd2	4.43	2.96	3.29	0	0	0
82	25do p24h001.nd2	16.51	16.43	1.64	0	0	0
83	25do p24h001.nd2	12.48	12.05	3.26	0	0	0
84	25do p24h001.nd2	11.25	9.21	6.46	0	0	0
85	25do p24h001.nd2	7.99	7.95	0.8	0	0	0
86	25do p24h001.nd2	3.35	3.35	0.01	0	0	0
87	25do p24h001.nd2	4.38	4.3	0.83	0	0	0
88	25do p24h001.nd2	7.02	7.02	0	0	0	0
89	25do p24h001.nd2	4.47	4.47	0	0	0	0
90	25do p24h001.nd2	6.94	6.76	1.56	0	0	0
91	25do p24h001.nd2	2.53	1.96	1.61	0	0	0
92	25do p24h001.nd2	3.65	3.35	1.45	0	0	0
93	25do p24h001.nd2	7.88	7.05	3.54	0	0	0
94	25do p24h001.nd2	2.33	2.33	0	0	0	0
95	25do p24h001.nd2	5.41	5.41	0	0	0	0
96	25do p24h001.nd2	17.35	17.21	2.23	0	0	0
97	25do p24h001.nd2	10.45	10.45	0.05	0	0	0
98	25do p24h001.nd2	12.94	12.38	3.77	0	0	0
99	25do p24h001.nd2	15	14.71	2.95	0	0	0
100	25do p24h001.nd2	29.43	29.43	0.05	0	0	0
101	25do p24h001.nd2	11.85	11.62	2.37	0	0	0
102	25do p24h001.nd2	11.12	11.08	0.88	0	0	0
103	25do p24h001.nd2	17.33	17.31	0.89	0	0	0
104	25do p24h001.nd2	7.28	7.28	0.04	0	0	0
105	25do p24h001.nd2	9.64	9.4	2.14	0	0	0
106	25do p24h001.nd2	1.63	0.77	1.44	0	0	0
107	25do p24h001.nd2	11.2	10.58	3.67	0	0	0
108	25do p24h001.nd2	12.58	12.4	2.1	0	0	0
109	25do p24h001.nd2	3.85	3.79	0.66	0	0	0
110	25do p24h001.nd2	0	0	0	0	0	0
111	25do p24h001.nd2	0	0	0	0	0	0
112	25do p24h001.nd2	4.61	2.09	4.12	0	0	0
113	25do p24h001.nd2	2.52	0.49	2.47	0	0	0
114	25do p24h001.nd2	4.56	2.05	4.08	0	0	0
115	25do p24h001.nd2	8.12	8.08	0.8	0	0	0
116	25do p24h001.nd2	2.01	1.19	1.62	0	0	0
117	25do p24h001.nd2	17.94	17.87	1.54	0	0	0
118	25do p24h001.nd2	14.14	13.8	3.08	0	0	0
119	25do p24h001.nd2	9.54	9.01	3.15	0	0	0
120	25do p24h001.nd2	16.69	16.25	3.85	0	0	0
121	25do p24h001.nd2	1.56	1.56	0.01	0	0	0
122	25do p24h001.nd2	22.44	22.32	2.3	0	0	0
123	25do p24h001.nd2	19.03	18.97	1.48	0	0	0
124	25do p24h001.nd2	35.58	35.51	2.28	0	0	0
125	25do p24h001.nd2	9.51	8.17	4.86	0	0	0
126	25do p24h001.nd2	22.58	22.33	3.4	0	0	0
127	25do p24h001.nd2	4.38	3.69	2.36	0	0	0
128	25do p24h001.nd2	8.15	7.98	1.63	0	0	0
129	25do p24h001.nd2	12.54	11.3	5.44	0	0	0
130	25do p24h001.nd2	4.19	3.56	2.22	0	0	0
131	25do p24h001.nd2	6.18	5.99	1.51	0	0	0
132	25do p24h001.nd2	3.02	3.02	0.01	0	0	0
133	25do p24h001.nd2	8.11	7.96	1.54	0	0	0
134	25do p24h001.nd2	12.44	12.34	1.59	0	0	0
135	25do p24h001.nd2	12.79	12.57	2.36	0	0	0
136	25do p24h001.nd2	32.53	32.28	4.01	0	0	0
137	25do p24h001.nd2	12.47	12.38	1.53	0	0	0
138	25do p24h001.nd2	5.94	5.9	0.71	0	0	0
139	25do p24h001.nd2	5.47	5.41	0.81	0	0	0
140	25do p24h001.nd2	6.58	6.58	0.02	0	0	0
141	25do p24h001.nd2	4.63	4.63	0.01	0	0	0
142	25do p24h001.nd2	4.75	4.75	0.01	0	0	0
143	25do p24h001.nd2	6.26	5.85	2.24	0	0	0
144	25do p24h001.nd2	33.31	33.06	4.11	0	0	0
145	25do p24h001.nd2	7.8	7.64	1.56	0	0	0
146	25do p24h001.nd2	10.1	10.1	0.01	0	0	0
Feature	Mean	St.Dev	Minimum	Maximum
Length xyz	10.44	8.42	0	41.69
Length xy	10.12	8.48	0	41.5
Height	1.64	1.7	0	8.21
Item	Source	Length xyz	Length xy	Height	ND.T	ND.Z	ND.M	Comment
1	25do p24h.nd2	9.43	8.34	4.4	0	0	0
2	25do p24h.nd2	13.57	10.5	8.6	0	0	0
3	25do p24h.nd2	12.58	12.28	2.75	0	0	0
4	25do p24h.nd2	29.88	29.69	3.39	0	0	0
5	25do p24h.nd2	33.45	33.26	3.63	0	0	0
6	25do p24h.nd2	30.51	30.2	4.36	0	0	0
7	25do p24h.nd2	16.95	16.92	0.85	0	0	0
8	25do p24h.nd2	4.66	3.14	3.44	0	0	0
9	25do p24h.nd2	4.53	2.91	3.48	0	0	0
10	25do p24h.nd2	13.26	13.24	0.74	0	0	0
11	25do p24h.nd2	12.64	12.64	0.01	0	0	0
12	25do p24h.nd2	5.94	5.87	0.91	0	0	0
13	25do p24h.nd2	7.07	7.07	0.01	0	0	0
14	25do p24h.nd2	6.92	6.92	0.01	0	0	0
15	25do p24h.nd2	14.8	14.77	0.88	0	0	0
16	25do p24h.nd2	0	0	0	0	0	0
17	25do p24h.nd2	6.65	6.65	0.02	0	0	0
18	25do p24h.nd2	14	13.88	1.84	0	0	0
19	25do p24h.nd2	2.37	2.37	0.01	0	0	0
20	25do p24h.nd2	2.33	2.16	0.88	0	0	0
21	25do p24h.nd2	11.76	11.44	2.71	0	0	0
22	25do p24h.nd2	3.22	3.22	0.01	0	0	0
23	25do p24h.nd2	8.57	8.53	0.86	0	0	0
24	25do p24h.nd2	22.59	22.57	1	0	0	0
25	25do p24h.nd2	15.39	15.14	2.75	0	0	0
26	25do p24h.nd2	3.65	2.48	2.68	0	0	0
27	25do p24h.nd2	21.32	21.14	2.77	0	0	0
28	25do p24h.nd2	0.96	0.33	0.9	0	0	0
29	25do p24h.nd2	12.16	11.64	3.51	0	0	0
30	25do p24h.nd2	3.35	3.23	0.9	0	0	0
31	25do p24h.nd2	6.66	6.6	0.9	0	0	0
32	25do p24h.nd2	15.88	15.88	0	0	0	0
33	25do p24h.nd2	5.85	5.57	1.76	0	0	0
34	25do p24h.nd2	4.54	4.46	0.88	0	0	0
35	25do p24h.nd2	13.62	13.52	1.68	0	0	0
36	25do p24h.nd2	8.98	8.94	0.9	0	0	0
37	25do p24h.nd2	4.25	3.86	1.77	0	0	0
38	25do p24h.nd2	6.85	3.12	6.1	0	0	0
39	25do p24h.nd2	8.67	8.26	2.62	0	0	0
40	25do p24h.nd2	35.98	35.97	0.87	0	0	0
41	25do p24h.nd2	4.52	4.52	0	0	0	0
42	25do p24h.nd2	6.4	6.16	1.77	0	0	0
43	25do p24h.nd2	6.29	6.29	0	0	0	0
44	25do p24h.nd2	18.33	18.33	0	0	0	0
45	25do p24h.nd2	9.86	9.22	3.51	0	0	0
46	25do p24h.nd2	6.85	6.85	0	0	0	0
47	25do p24h.nd2	0.74	0.74	0	0	0	0
48	25do p24h.nd2	1.85	1.63	0.88	0	0	0
49	25do p24h.nd2	3.74	3.64	0.88	0	0	0
50	25do p24h.nd2	5.8	5.8	0	0	0	0
51	25do p24h.nd2	16.59	16.59	0	0	0	0
52	25do p24h.nd2	4.28	3.37	2.63	0	0	0
53	25do p24h.nd2	9.87	9.87	0	0	0	0
54	25do p24h.nd2	8.98	8.94	0.88	0	0	0
55	25do p24h.nd2	12.38	12.25	1.8	0	0	0
56	25do p24h.nd2	5.61	4.95	2.66	0	0	0
57	25do p24h.nd2	3.29	3.16	0.9	0	0	0
58	25do p24h.nd2	5.92	5.65	1.77	0	0	0
59	25do p24h.nd2	6.8	4.31	5.26	0	0	0
60	25do p24h.nd2	0	0	0	0	0	0
61	25do p24h.nd2	12.58	12.41	2.06	0	0	0
62	25do p24h.nd2	2.63	2.63	0	0	0	0
63	25do p24h.nd2	32.78	32.7	2.36	0	0	0
64	25do p24h.nd2	24.98	24.94	1.33	0	0	0
65	25do p24h.nd2	5.73	3.72	4.36	0	0	0
66	25do p24h.nd2	8.53	7.78	3.48	0	0	0
67	25do p24h.nd2	39.98	39.96	1.35	0	0	0
68	25do p24h.nd2	0	0	0	0	0	0
69	25do p24h.nd2	4.19	1.64	3.86	0	0	0
70	25do p24h.nd2	24.55	24.06	4.87	0	0	0
71	25do p24h.nd2	22.21	22.2	0.49	0	0	0
72	25do p24h.nd2	34.18	34.15	1.3	0	0	0
73	25do p24h.nd2	5.93	5.93	0.02	0	0	0
74	25do p24h.nd2	7.45	7.01	2.51	0	0	0
75	25do p24h.nd2	17.56	17.01	4.38	0	0	0
76	25do p24h.nd2	7.92	7.74	1.69	0	0	0
77	25do p24h.nd2	12.51	12.51	0	0	0	0
78	25do p24h.nd2	5.08	5.08	0	0	0	0
79	25do p24h.nd2	12.63	12.63	0	0	0	0
80	25do p24h.nd2	35.48	35.07	5.41	0	0	0
81	25do p24h.nd2	13.52	13.41	1.75	0	0	0
82	25do p24h.nd2	7.36	7.14	1.79	0	0	0
83	25do p24h.nd2	6.78	6.72	0.89	0	0	0
84	25do p24h.nd2	2.33	2.33	0	0	0	0
85	25do p24h.nd2	4.93	4.85	0.89	0	0	0
86	25do p24h.nd2	0	0	0	0	0	0
87	25do p24h.nd2	17.42	16.85	4.4	0	0	0
88	25do p24h.nd2	27.77	27.73	1.55	0	0	0
89	25do p24h.nd2	29.63	29.62	0.35	0	0	0
90	25do p24h.nd2	18.31	18.31	0.59	0	0	0
91	25do p24h.nd2	27.23	26.97	3.78	0	0	0
92	25do p24h.nd2	1.63	0.4	1.58	0	0	0
93	25do p24h.nd2	0	0	0	0	0	0
94	25do p24h.nd2	13.39	13.14	2.59	0	0	0
95	25do p24h.nd2	6.45	6.2	1.77	0	0	0
96	25do p24h.nd2	18.61	17.56	6.15	0	0	0
97	25do p24h.nd2	25.91	25.91	0	0	0	0
98	25do p24h.nd2	8.15	8.09	0.91	0	0	0
99	25do p24h.nd2	8.77	8.77	0.01	0	0	0
100	25do p24h.nd2	9.4	9.22	1.79	0	0	0
101	25do p24h.nd2	3.32	3.29	0.45	0	0	0
102	25do p24h.nd2	13.87	13.84	0.9	0	0	0
103	25do p24h.nd2	12.46	10.77	6.26	0	0	0
104	25do p24h.nd2	15.12	15.1	0.89	0	0	0
105	25do p24h.nd2	14.39	13.66	4.54	0	0	0
106	25do p24h.nd2	0	0	0	0	0	0
107	25do p24h.nd2	10.81	10.78	0.84	0	0	0
108	25do p24h.nd2	14.33	13.36	5.19	0	0	0
109	25do p24h.nd2	7.65	6.85	3.41	0	0	0
110	25do p24h.nd2	13.37	13.09	2.7	0	0	0
111	25do p24h.nd2	10.2	10.2	0.02	0	0	0
112	25do p24h.nd2	10.13	8.64	5.29	0	0	0
113	25do p24h.nd2	6.97	6.76	1.73	0	0	0
114	25do p24h.nd2	0	0	0	0	0	0
115	25do p24h.nd2	13.18	13.06	1.77	0	0	0
116	25do p24h.nd2	25.15	25.01	2.64	0	0	0
117	25do p24h.nd2	13.37	13.34	0.91	0	0	0
118	25do p24h.nd2	2.69	2.05	1.75	0	0	0
119	25do p24h.nd2	16.03	15.82	2.59	0	0	0
120	25do p24h.nd2	13.3	13.05	2.58	0	0	0
121	25do p24h.nd2	20.26	20.19	1.7	0	0	0
122	25do p24h.nd2	14.22	14.22	0	0	0	0
123	25do p24h.nd2	10.06	9.94	1.59	0	0	0
124	25do p24h.nd2	9.62	9.62	0	0	0	0
125	25do p24h.nd2	22.79	22.66	2.52	0	0	0
126	25do p24h.nd2	0.57	0.57	0.0008	0	0	0
127	25do p24h.nd2	3.42	3.32	0.82	0	0	0
128	25do p24h.nd2	4.35	4.35	0.004	0	0	0
129	25do p24h.nd2	5.7	5.64	0.85	0	0	0
130	25do p24h.nd2	5.04	5.04	0.01	0	0	0
131	25do p24h.nd2	3.62	3.52	0.84	0	0	0
132	25do p24h.nd2	0	0	0	0	0	0
133	25do p24h.nd2	0.34	0.34	0.0001	0	0	0
134	25do p24h.nd2	3.65	3.54	0.9	0	0	0
135	25do p24h.nd2	19.79	19.44	3.73	0	0	0
136	25do p24h.nd2	33.17	33.13	1.56	0	0	0
137	25do p24h.nd2	23.49	22.73	5.91	0	0	0
138	25do p24h.nd2	8.03	7.99	0.84	0	0	0
139	25do p24h.nd2	6.04	5.98	0.89	0	0	0
140	25do p24h.nd2	10.13	9.98	1.75	0	0	0
141	25do p24h.nd2	10.64	10.5	1.75	0	0	0
142	25do p24h.nd2	0	0	0	0	0	0
143	25do p24h.nd2	0	0	0	0	0	0
144	25do p24h.nd2	18.66	18.19	4.15	0	0	0
Feature	Mean	St.Dev	Minimum	Maximum
Length xyz	11.17	8.98	0	39.98
Length xy	10.85	9.04	0	39.96
Height	1.69	1.73	0	8.6
Item	Source	Length xyz	Length xy	Height	ND.T	ND.Z	ND.M	Comment
1	25do p24h003.nd2	3.12	2.06	2.34	0	0	0
2	25do p24h003.nd2	0	0	0	0	0	0
3	25do p24h003.nd2	19.6	19.54	1.5	0	0	0
4	25do p24h003.nd2	32.98	32.56	5.25	0	0	0
5	25do p24h003.nd2	15.01	15.01	0.1	0	0	0
6	25do p24h003.nd2	12.61	12.53	1.46	0	0	0
7	25do p24h003.nd2	11.57	11.57	0	0	0	0
8	25do p24h003.nd2	1.22	1.22	0	0	0	0
9	25do p24h003.nd2	1.78	1.78	0	0	0	0
10	25do p24h003.nd2	14	13.98	0.8	0	0	0
11	25do p24h003.nd2	24.74	24.65	2.03	0	0	0
12	25do p24h003.nd2	23.67	22.01	8.71	0	0	0
13	25do p24h003.nd2	11.63	11.28	2.84	0	0	0
14	25do p24h003.nd2	2.55	1.55	2.03	0	0	0
15	25do p24h003.nd2	1.21	1.02	0.66	0	0	0
16	25do p24h003.nd2	24.32	24.18	2.61	0	0	0
17	25do p24h003.nd2	40.23	39.71	6.42	0	0	0
18	25do p24h003.nd2	14.04	14.02	0.82	0	0	0
19	25do p24h003.nd2	6.96	6.53	2.4	0	0	0
20	25do p24h003.nd2	22.24	22.24	0.12	0	0	0
21	25do p24h003.nd2	33.74	33.73	0.85	0	0	0
22	25do p24h003.nd2	23.21	22.51	5.68	0	0	0
23	25do p24h003.nd2	0	0	0	0	0	0
24	25do p24h003.nd2	23.46	23.1	4.1	0	0	0
25	25do p24h003.nd2	16.82	16.5	3.25	0	0	0
26	25do p24h003.nd2	11.4	10.98	3.09	0	0	0
27	25do p24h003.nd2	5.74	5.74	0.01	0	0	0
28	25do p24h003.nd2	0	0	0	0	0	0
29	25do p24h003.nd2	15.09	15.09	0.1	0	0	0
30	25do p24h003.nd2	0	0	0	0	0	0
31	25do p24h003.nd2	2.27	2.27	0	0	0	0
32	25do p24h003.nd2	2.25	2.25	0.004	0	0	0
33	25do p24h003.nd2	14.26	14.26	0.07	0	0	0
34	25do p24h003.nd2	7.15	7.15	0	0	0	0
35	25do p24h003.nd2	15.07	14.87	2.42	0	0	0
36	25do p24h003.nd2	5.06	3.91	3.22	0	0	0
37	25do p24h003.nd2	0	0	0	0	0	0
38	25do p24h003.nd2	8.96	8.82	1.58	0	0	0
39	25do p24h003.nd2	18.15	18.09	1.58	0	0	0
40	25do p24h003.nd2	2.82	2.82	0	0	0	0
41	25do p24h003.nd2	3.03	2.56	1.63	0	0	0
42	25do p24h003.nd2	20.47	19.88	4.86	0	0	0
43	25do p24h003.nd2	13.66	12.73	4.96	0	0	0
44	25do p24h003.nd2	13.53	13.5	0.81	0	0	0
45	25do p24h003.nd2	15.34	15.15	2.42	0	0	0
46	25do p24h003.nd2	25.59	25.57	0.81	0	0	0
47	25do p24h003.nd2	30.86	30.7	3.21	0	0	0
48	25do p24h003.nd2	8.29	7.28	3.96	0	0	0
49	25do p24h003.nd2	13.07	13.04	0.78	0	0	0
50	25do p24h003.nd2	0	0	0	0	0	0
51	25do p24h003.nd2	3.84	3.57	1.43	0	0	0
52	25do p24h003.nd2	5.7	3.67	4.36	0	0	0
53	25do p24h003.nd2	11.71	11.49	2.22	0	0	0
54	25do p24h003.nd2	0	0	0	0	0	0
55	25do p24h003.nd2	8.43	8.3	1.46	0	0	0
56	25do p24h003.nd2	7.92	7.92	0	0	0	0
57	25do p24h003.nd2	9.42	8.88	3.16	0	0	0
58	25do p24h003.nd2	0.91	0.91	0	0	0	0
59	25do p24h003.nd2	8.98	8.98	0	0	0	0
60	25do p24h003.nd2	0.87	0.31	0.81	0	0	0
61	25do p24h003.nd2	17.68	16.43	6.52	0	0	0
62	25do p24h003.nd2	20.1	20.1	0	0	0	0
63	25do p24h003.nd2	45.94	45.75	4.23	0	0	0
64	25do p24h003.nd2	33.55	33.54	0.86	0	0	0
65	25do p24h003.nd2	8.81	7.3	4.94	0	0	0
66	25do p24h003.nd2	8.2	8.2	0.0002	0	0	0
67	25do p24h003.nd2	24.24	24.23	0.82	0	0	0
68	25do p24h003.nd2	0	0	0	0	0	0
69	25do p24h003.nd2	3.97	3.97	0	0	0	0
70	25do p24h003.nd2	2.3	2.3	0	0	0	0
71	25do p24h003.nd2	8.84	8.52	2.35	0	0	0
72	25do p24h003.nd2	12.23	12.23	0.03	0	0	0
73	25do p24h003.nd2	3.94	2.61	2.95	0	0	0
74	25do p24h003.nd2	4.26	3.05	2.98	0	0	0
75	25do p24h003.nd2	14.75	10.18	10.67	0	0	0
76	25do p24h003.nd2	6.67	3.88	5.43	0	0	0
77	25do p24h003.nd2	6.67	6.67	0.0009	0	0	0
78	25do p24h003.nd2	17.57	17.57	0	0	0	0
79	25do p24h003.nd2	4.76	4.7	0.79	0	0	0
80	25do p24h003.nd2	11.69	5.2	10.47	0	0	0
81	25do p24h003.nd2	24.84	24.83	0.78	0	0	0
82	25do p24h003.nd2	15.29	15.2	1.6	0	0	0
83	25do p24h003.nd2	10.56	10.28	2.41	0	0	0
84	25do p24h003.nd2	6.03	6.03	0	0	0	0
85	25do p24h003.nd2	10.72	10.6	1.61	0	0	0
86	25do p24h003.nd2	19.61	19.54	1.58	0	0	0
87	25do p24h003.nd2	21.55	21.32	3.14	0	0	0
88	25do p24h003.nd2	16.17	16.17	0	0	0	0
89	25do p24h003.nd2	19.46	19.44	0.75	0	0	0
90	25do p24h003.nd2	13.15	13.15	0	0	0	0
91	25do p24h003.nd2	6.61	6.61	0	0	0	0
92	25do p24h003.nd2	4.72	4.72	0	0	0	0
93	25do p24h003.nd2	11.11	11.08	0.83	0	0	0
94	25do p24h003.nd2	6.67	1.06	6.58	0	0	0
95	25do p24h003.nd2	2.71	1.11	2.47	0	0	0
96	25do p24h003.nd2	2.49	1.88	1.65	0	0	0
97	25do p24h003.nd2	20.61	20.6	0.29	0	0	0
98	25do p24h003.nd2	0	0	0	0	0	0
99	25do p24h003.nd2	25.85	25.81	1.38	0	0	0
100	25do p24h003.nd2	28.22	28.18	1.44	0	0	0
101	25do p24h003.nd2	24.29	24.15	2.58	0	0	0
102	25do p24h003.nd2	15.73	15.42	3.14	0	0	0
103	25do p24h003.nd2	26.15	25.74	4.62	0	0	0
104	25do p24h003.nd2	9.72	9.69	0.77	0	0	0
105	25do p24h003.nd2	14.99	14.81	2.33	0	0	0
106	25do p24h003.nd2	0	0	0	0	0	0
107	25do p24h003.nd2	5.63	5.42	1.52	0	0	0
108	25do p24h003.nd2	9.21	9.21	0	0	0	0
109	25do p24h003.nd2	6.53	6.53	0	0	0	0
110	25do p24h003.nd2	18.2	18.2	0	0	0	0
111	25do p24h003.nd2	21.8	21.8	0	0	0	0
112	25do p24h003.nd2	14.31	14.29	0.83	0	0	0
113	25do p24h003.nd2	2.5	2.5	0	0	0	0
114	25do p24h003.nd2	0	0	0	0	0	0
115	25do p24h003.nd2	12.69	12.34	2.96	0	0	0
116	25do p24h003.nd2	9.95	9.74	2.05	0	0	0
117	25do p24h003.nd2	5.62	5.24	2.02	0	0	0
118	25do p24h003.nd2	1.72	1.72	0	0	0	0
119	25do p24h003.nd2	19.62	19.49	2.18	0	0	0
120	25do p24h003.nd2	9.35	8.92	2.81	0	0	0
121	25do p24h003.nd2	5.15	3.81	3.46	0	0	0
122	25do p24h003.nd2	0	0	0	0	0	0
123	25do p24h003.nd2	11.46	10.86	3.67	0	0	0
124	25do p24h003.nd2	18.35	18.35	0.11	0	0	0
125	25do p24h003.nd2	7.59	7.56	0.74	0	0	0
126	25do p24h003.nd2	6.77	6.09	2.95	0	0	0
127	25do p24h003.nd2	3.11	2.21	2.18	0	0	0
128	25do p24h003.nd2	0.79	0.3	0.73	0	0	0
129	25do p24h003.nd2	4.96	3.97	2.98	0	0	0
130	25do p24h003.nd2	3.75	3.67	0.75	0	0	0
131	25do p24h003.nd2	0	0	0	0	0	0
132	25do p24h003.nd2	18.55	18.54	0.77	0	0	0
133	25do p24h003.nd2	9.2	9.17	0.76	0	0	0
134	25do p24h003.nd2	8.08	7.93	1.53	0	0	0
135	25do p24h003.nd2	12.41	11.53	4.6	0	0	0
136	25do p24h003.nd2	9.93	9.9	0.88	0	0	0
137	25do p24h003.nd2	33.85	33.85	0.4	0	0	0
Feature	Mean	St.Dev	Minimum	Maximum
Length xyz	11.64	9.39	0	45.94
Length xy	11.25	9.48	0	45.75
Height	1.73	2.07	0	10.67
Item	Source	Length xyz	Length xy	Height	ND.T	ND.Z	ND.M	Comment
1	25do p24h003.nd2	3.07	1.95	2.38	0	0	0
2	25do p24h003.nd2	0.36	0.36	0.002	0	0	0
3	25do p24h003.nd2	3.76	3.41	1.59	0	0	0
4	25do p24h003.nd2	5.78	4.18	3.99	0	0	0
5	25do p24h003.nd2	4.53	3.2	3.21	0	0	0
6	25do p24h003.nd2	0.58	0.58	0.004	0	0	0
7	25do p24h003.nd2	4.78	4.11	2.44	0	0	0
8	25do p24h003.nd2	23.28	22.59	5.65	0	0	0
9	25do p24h003.nd2	10.6	10.1	3.24	0	0	0
10	25do p24h003.nd2	5.29	5.23	0.81	0	0	0
11	25do p24h003.nd2	15.46	15.11	3.24	0	0	0
12	25do p24h003.nd2	24.26	23.92	4.04	0	0	0
13	25do p24h003.nd2	6.57	5.15	4.07	0	0	0
14	25do p24h003.nd2	4.08	0.54	4.04	0	0	0
15	25do p24h003.nd2	4.52	3.79	2.46	0	0	0
16	25do p24h003.nd2	13.92	13.71	2.42	0	0	0
17	25do p24h003.nd2	16.68	16.6	1.7	0	0	0
18	25do p24h003.nd2	11.67	11.4	2.51	0	0	0
19	25do p24h003.nd2	7.57	7.16	2.47	0	0	0
20	25do p24h003.nd2	8.29	8.25	0.79	0	0	0
21	25do p24h003.nd2	9.14	9	1.57	0	0	0
22	25do p24h003.nd2	11.42	11.3	1.65	0	0	0
23	25do p24h003.nd2	20.66	20.66	0.16	0	0	0
24	25do p24h003.nd2	17.64	16.54	6.15	0	0	0
25	25do p24h003.nd2	0	0	0	0	0	0
26	25do p24h003.nd2	34.11	34.08	1.45	0	0	0
27	25do p24h003.nd2	24.55	24.23	3.95	0	0	0
28	25do p24h003.nd2	13.26	13.17	1.61	0	0	0
29	25do p24h003.nd2	33.48	33.44	1.66	0	0	0
30	25do p24h003.nd2	6.23	6.22	0.41	0	0	0
31	25do p24h003.nd2	3.53	3.51	0.41	0	0	0
32	25do p24h003.nd2	3.9	3.9	0.01	0	0	0
33	25do p24h003.nd2	6.17	6.17	0	0	0	0
34	25do p24h003.nd2	44.33	43.91	6.1	0	0	0
35	25do p24h003.nd2	11.11	10.64	3.21	0	0	0
36	25do p24h003.nd2	7.41	7.36	0.81	0	0	0
37	25do p24h003.nd2	7.73	7.73	0	0	0	0
38	25do p24h003.nd2	14.32	14.24	1.56	0	0	0
39	25do p24h003.nd2	10.7	10.7	0	0	0	0
40	25do p24h003.nd2	7.43	6.67	3.28	0	0	0
41	25do p24h003.nd2	28.26	27.99	3.92	0	0	0
42	25do p24h003.nd2	21	20.94	1.59	0	0	0
43	25do p24h003.nd2	14.69	14.33	3.21	0	0	0
44	25do p24h003.nd2	14.12	14.03	1.57	0	0	0
45	25do p24h003.nd2	1.23	0.95	0.78	0	0	0
46	25do p24h003.nd2	4.66	4.66	0	0	0	0
47	25do p24h003.nd2	3.5	3.41	0.79	0	0	0
48	25do p24h003.nd2	3.09	2.66	1.57	0	0	0
49	25do p24h003.nd2	5.56	3.05	4.65	0	0	0
50	25do p24h003.nd2	5.44	5.39	0.77	0	0	0
51	25do p24h003.nd2	3.7	3.7	0.01	0	0	0
52	25do p24h003.nd2	4.47	4.41	0.74	0	0	0
53	25do p24h003.nd2	2.61	2.5	0.74	0	0	0
54	25do p24h003.nd2	22.83	22.81	0.82	0	0	0
55	25do p24h003.nd2	22.79	22.68	2.29	0	0	0
56	25do p24h003.nd2	13.43	13.22	2.37	0	0	0
57	25do p24h003.nd2	13.33	13.26	1.37	0	0	0
58	25do p24h003.nd2	11.7	11	3.98	0	0	0
59	25do p24h003.nd2	23.76	23.76	0.31	0	0	0
60	25do p24h003.nd2	19.1	18.96	2.36	0	0	0
61	25do p24h003.nd2	25.55	24.72	6.47	0	0	0
62	25do p24h003.nd2	12.22	11.98	2.4	0	0	0
63	25do p24h003.nd2	22.92	22.58	3.9	0	0	0
64	25do p24h003.nd2	23.26	23.25	0.76	0	0	0
65	25do p24h003.nd2	1.55	1.55	0.001	0	0	0
66	25do p24h003.nd2	19.99	19.67	3.55	0	0	0
67	25do p24h003.nd2	14.37	14.33	1.1	0	0	0
68	25do p24h003.nd2	4.93	3.19	3.76	0	0	0
69	25do p24h003.nd2	2.84	1.63	2.33	0	0	0
70	25do p24h003.nd2	4.7	2.67	3.87	0	0	0
71	25do p24h003.nd2	3.19	0.66	3.12	0	0	0
72	25do p24h003.nd2	10.12	10.12	0	0	0	0
73	25do p24h003.nd2	3.17	2.76	1.57	0	0	0
74	25do p24h003.nd2	4.05	4.05	0	0	0	0
75	25do p24h003.nd2	0	0	0	0	0	0
76	25do p24h003.nd2	3.2	3.2	0	0	0	0
77	25do p24h003.nd2	3.74	3.74	0	0	0	0
78	25do p24h003.nd2	1.96	1.96	0.0009	0	0	0
79	25do p24h003.nd2	0	0	0	0	0	0
80	25do p24h003.nd2	0	0	0	0	0	0
81	25do p24h003.nd2	0.98	0.54	0.82	0	0	0
82	25do p24h003.nd2	2.79	2.67	0.82	0	0	0
83	25do p24h003.nd2	2.09	2.09	0.001	0	0	0
84	25do p24h003.nd2	2.08	2.08	0	0	0	0
85	25do p24h003.nd2	3.5	3.5	0	0	0	0
86	25do p24h003.nd2	9.23	8.92	2.38	0	0	0
87	25do p24h003.nd2	0.5	0.5	0	0	0	0
88	25do p24h003.nd2	3.5	1.55	3.13	0	0	0
89	25do p24h003.nd2	2.43	2.3	0.77	0	0	0
90	25do p24h003.nd2	3.21	2.25	2.29	0	0	0
91	25do p24h003.nd2	3.24	2.87	1.5	0	0	0
92	25do p24h003.nd2	3.91	3.83	0.74	0	0	0
93	25do p24h003.nd2	21.11	21.06	1.46	0	0	0
94	25do p24h003.nd2	18.39	18.38	0.71	0	0	0
95	25do p24h003.nd2	15.09	11.79	9.42	0	0	0
96	25do p24h003.nd2	0	0	0	0	0	0
97	25do p24h003.nd2	9.87	9.77	1.38	0	0	0
98	25do p24h003.nd2	0	0	0	0	0	0
99	25do p24h003.nd2	0	0	0	0	0	0
100	25do p24h003.nd2	0.15	0.15	0.0004	0	0	0
101	25do p24h003.nd2	5.63	5.29	1.93	0	0	0
102	25do p24h003.nd2	27.63	27.2	4.87	0	0	0
103	25do p24h003.nd2	27.76	27.33	4.85	0	0	0
104	25do p24h003.nd2	19.02	18.95	1.62	0	0	0
105	25do p24h003.nd2	20.81	20.02	5.67	0	0	0
106	25do p24h003.nd2	12.1	12.1	0	0	0	0
107	25do p24h003.nd2	13.66	10.43	8.82	0	0	0
108	25do p24h003.nd2	27.91	27.72	3.18	0	0	0
109	25do p24h003.nd2	5.06	5	0.79	0	0	0
110	25do p24h003.nd2	22.99	22.5	4.74	0	0	0
111	25do p24h003.nd2	16.16	16.08	1.57	0	0	0
112	25do p24h003.nd2	25.22	24.41	6.32	0	0	0
113	25do p24h003.nd2	20.4	20.33	1.65	0	0	0
114	25do p24h003.nd2	4.98	4.92	0.79	0	0	0
115	25do p24h003.nd2	2.42	2.29	0.78	0	0	0
116	25do p24h003.nd2	4.59	3.34	3.14	0	0	0
117	25do p24h003.nd2	3.81	3.72	0.81	0	0	0
118	25do p24h003.nd2	3.15	3.05	0.78	0	0	0
119	25do p24h003.nd2	0	0	0	0	0	0
120	25do p24h003.nd2	24.08	23.96	2.41	0	0	0
121	25do p24h003.nd2	3.24	0.44	3.2	0	0	0
122	25do p24h003.nd2	0	0	0	0	0	0
123	25do p24h003.nd2	7.18	5.31	4.84	0	0	0
124	25do p24h003.nd2	28.09	27.99	2.38	0	0	0
125	25do p24h003.nd2	25.8	25.79	0.81	0	0	0
126	25do p24h003.nd2	6.64	6.59	0.82	0	0	0
127	25do p24h003.nd2	10.55	10.44	1.54	0	0	0
128	25do p24h003.nd2	12	8.35	8.62	0	0	0
129	25do p24h003.nd2	0	0	0	0	0	0
130	25do p24h003.nd2	12.62	12.62	0	0	0	0
131	25do p24h003.nd2	11.19	11.16	0.82	0	0	0
132	25do p24h003.nd2	42.67	42.66	0.96	0	0	0
133	25do p24h003.nd2	9.77	9.77	0.35	0	0	0
134	25do p24h003.nd2	16.63	14.8	7.6	0	0	0
135	25do p24h003.nd2	2.3	2.3	0.004	0	0	0
136	25do p24h003.nd2	3.76	3.43	1.53	0	0	0
137	25do p24h003.nd2	2.88	1.68	2.34	0	0	0
138	25do p24h003.nd2	8.53	7.92	3.19	0	0	0
139	25do p24h003.nd2	5.49	5.49	0.004	0	0	0
140	25do p24h003.nd2	5.99	5.99	0.003	0	0	0
141	25do p24h003.nd2	6.66	6.66	0.003	0	0	0
142	25do p24h003.nd2	3.52	3.44	0.76	0	0	0
143	25do p24h003.nd2	2.95	2.05	2.13	0	0	0
144	25do p24h003.nd2	2.07	2.07	0.003	0	0	0
145	25do p24h003.nd2	0	0	0	0	0	0
Feature	Mean	St.Dev	Minimum	Maximum
Length xyz	10.23	9.37	0	44.33
Length xy	9.8	9.43	0	43.91
Height	1.89	2	0	9.42

## Sheet: Fmi gogoDDD
Item	Source	Length xyz	Length xy	Height	ND.T	ND.Z	ND.M	Comment
1	sensFLP GMRgal4 U-fsfmCD8GFP 25do p24h.nd2	3.85	3.85	0.02	0	0	0
2	sensFLP GMRgal4 U-fsfmCD8GFP 25do p24h.nd2	17.38	17.37	0.61	0	0	0				length	sample1	sample2	sample3	sample4	total
3	sensFLP GMRgal4 U-fsfmCD8GFP 25do p24h.nd2	4.15	1.03	4.02	0	0	0				5	90	76	89	91	346
4	sensFLP GMRgal4 U-fsfmCD8GFP 25do p24h.nd2	1.01	1.01	0.001	0	0	0				15	46	64	43	38	191
5	sensFLP GMRgal4 U-fsfmCD8GFP 25do p24h.nd2	0.77	0.49	0.59	0	0	0				25	8	8	9	7	32
6	sensFLP GMRgal4 U-fsfmCD8GFP 25do p24h.nd2	3.45	2.95	1.8	0	0	0				25~	0	3	3	5	11
7	sensFLP GMRgal4 U-fsfmCD8GFP 25do p24h.nd2	1.54	1.54	0.001	0	0	0					#N/A	#N/A	#N/A	#N/A
8	sensFLP GMRgal4 U-fsfmCD8GFP 25do p24h.nd2	3.82	3.77	0.62	0	0	0					#N/A	#N/A	#N/A	#N/A
9	sensFLP GMRgal4 U-fsfmCD8GFP 25do p24h.nd2	8.38	2.79	7.9	0	0	0					#N/A	#N/A	#N/A	#N/A
10	sensFLP GMRgal4 U-fsfmCD8GFP 25do p24h.nd2	1.44	1.44	0.002	0	0	0					#N/A	#N/A	#N/A	#N/A
11	sensFLP GMRgal4 U-fsfmCD8GFP 25do p24h.nd2	7.58	2.88	7.01	0	0	0					#N/A	#N/A	#N/A	#N/A
12	sensFLP GMRgal4 U-fsfmCD8GFP 25do p24h.nd2	0	0	0	0	0	0					#N/A	#N/A	#N/A	#N/A	#N/A
13	sensFLP GMRgal4 U-fsfmCD8GFP 25do p24h.nd2	0	0	0	0	0	0					#N/A	#N/A	#N/A	#N/A
14	sensFLP GMRgal4 U-fsfmCD8GFP 25do p24h.nd2	0	0	0	0	0	0					#N/A	#N/A	#N/A	#N/A
15	sensFLP GMRgal4 U-fsfmCD8GFP 25do p24h.nd2	3.61	3.57	0.53	0	0	0					#N/A	#N/A	#N/A	#N/A
16	sensFLP GMRgal4 U-fsfmCD8GFP 25do p24h.nd2	12.28	9.12	8.22	0	0	0					#N/A	#N/A	#N/A	#N/A
17	sensFLP GMRgal4 U-fsfmCD8GFP 25do p24h.nd2	3.33	3.27	0.63	0	0	0					#N/A	#N/A	#N/A	#N/A
18	sensFLP GMRgal4 U-fsfmCD8GFP 25do p24h.nd2	9.13	8.79	2.46	0	0	0
19	sensFLP GMRgal4 U-fsfmCD8GFP 25do p24h.nd2	24.43	23.1	7.97	0	0	0
20	sensFLP GMRgal4 U-fsfmCD8GFP 25do p24h.nd2	0	0	0	0	0	0
21	sensFLP GMRgal4 U-fsfmCD8GFP 25do p24h.nd2	10.67	10.41	2.38	0	0	0
22	sensFLP GMRgal4 U-fsfmCD8GFP 25do p24h.nd2	3.56	3.56	0.02	0	0	0
23	sensFLP GMRgal4 U-fsfmCD8GFP 25do p24h.nd2	42.19	41.97	4.35	0	0	0
24	sensFLP GMRgal4 U-fsfmCD8GFP 25do p24h.nd2	56.15	55.42	9	0	0	0
25	sensFLP GMRgal4 U-fsfmCD8GFP 25do p24h.nd2	6	5.18	3.02	0	0	0
26	sensFLP GMRgal4 U-fsfmCD8GFP 25do p24h.nd2	0	0	0	0	0	0
27	sensFLP GMRgal4 U-fsfmCD8GFP 25do p24h.nd2	7.28	2.66	6.77	0	0	0
28	sensFLP GMRgal4 U-fsfmCD8GFP 25do p24h.nd2	0.9	0.9	0.0005	0	0	0
29	sensFLP GMRgal4 U-fsfmCD8GFP 25do p24h.nd2	14.89	14.41	3.75	0	0	0
30	sensFLP GMRgal4 U-fsfmCD8GFP 25do p24h.nd2	0	0	0	0	0	0
31	sensFLP GMRgal4 U-fsfmCD8GFP 25do p24h.nd2	7.23	7.23	0.01	0	0	0
32	sensFLP GMRgal4 U-fsfmCD8GFP 25do p24h.nd2	0.44	0.44	0.002	0	0	0
33	sensFLP GMRgal4 U-fsfmCD8GFP 25do p24h.nd2	3.01	2.94	0.63	0	0	0
34	sensFLP GMRgal4 U-fsfmCD8GFP 25do p24h.nd2	2.17	2.17	2e-05	0	0	0
35	sensFLP GMRgal4 U-fsfmCD8GFP 25do p24h.nd2	0	0	0	0	0	0
36	sensFLP GMRgal4 U-fsfmCD8GFP 25do p24h.nd2	0	0	0	0	0	0
37	sensFLP GMRgal4 U-fsfmCD8GFP 25do p24h.nd2	1.34	0.3	1.3	0	0	0
38	sensFLP GMRgal4 U-fsfmCD8GFP 25do p24h.nd2	0	0	0	0	0	0
39	sensFLP GMRgal4 U-fsfmCD8GFP 25do p24h.nd2	0	0	0	0	0	0
40	sensFLP GMRgal4 U-fsfmCD8GFP 25do p24h.nd2	8.58	8.58	0.07	0	0	0
41	sensFLP GMRgal4 U-fsfmCD8GFP 25do p24h.nd2	0	0	0	0	0	0
42	sensFLP GMRgal4 U-fsfmCD8GFP 25do p24h.nd2	0	0	0	0	0	0
43	sensFLP GMRgal4 U-fsfmCD8GFP 25do p24h.nd2	2.39	2.39	0	0	0	0
44	sensFLP GMRgal4 U-fsfmCD8GFP 25do p24h.nd2	0	0	0	0	0	0
45	sensFLP GMRgal4 U-fsfmCD8GFP 25do p24h.nd2	6.43	5.84	2.68	0	0	0
46	sensFLP GMRgal4 U-fsfmCD8GFP 25do p24h.nd2	5.09	5.05	0.66	0	0	0
47	sensFLP GMRgal4 U-fsfmCD8GFP 25do p24h.nd2	0	0	0	0	0	0
48	sensFLP GMRgal4 U-fsfmCD8GFP 25do p24h.nd2	3.24	2.98	1.29	0	0	0
49	sensFLP GMRgal4 U-fsfmCD8GFP 25do p24h.nd2	4.12	4.12	0	0	0	0
50	sensFLP GMRgal4 U-fsfmCD8GFP 25do p24h.nd2	6.59	6.59	0	0	0	0
51	sensFLP GMRgal4 U-fsfmCD8GFP 25do p24h.nd2	3.95	3.95	0	0	0	0
52	sensFLP GMRgal4 U-fsfmCD8GFP 25do p24h.nd2	4.41	3.58	2.56	0	0	0
53	sensFLP GMRgal4 U-fsfmCD8GFP 25do p24h.nd2	4.36	3.91	1.93	0	0	0
54	sensFLP GMRgal4 U-fsfmCD8GFP 25do p24h.nd2	3.98	3.95	0.46	0	0	0
55	sensFLP GMRgal4 U-fsfmCD8GFP 25do p24h.nd2	14.13	14.13	0.49	0	0	0
56	sensFLP GMRgal4 U-fsfmCD8GFP 25do p24h.nd2	15.87	15.85	0.63	0	0	0
57	sensFLP GMRgal4 U-fsfmCD8GFP 25do p24h.nd2	2.78	2.45	1.33	0	0	0
58	sensFLP GMRgal4 U-fsfmCD8GFP 25do p24h.nd2	10.79	10.72	1.27	0	0	0
59	sensFLP GMRgal4 U-fsfmCD8GFP 25do p24h.nd2	23.33	23.26	1.9	0	0	0
60	sensFLP GMRgal4 U-fsfmCD8GFP 25do p24h.nd2	13.52	11.29	7.44	0	0	0
61	sensFLP GMRgal4 U-fsfmCD8GFP 25do p24h.nd2	4.26	3.76	1.99	0	0	0
62	sensFLP GMRgal4 U-fsfmCD8GFP 25do p24h.nd2	11.17	11.1	1.22	0	0	0
63	sensFLP GMRgal4 U-fsfmCD8GFP 25do p24h.nd2	6.28	6.25	0.63	0	0	0
64	sensFLP GMRgal4 U-fsfmCD8GFP 25do p24h.nd2	1.43	1.27	0.66	0	0	0
65	sensFLP GMRgal4 U-fsfmCD8GFP 25do p24h.nd2	1.2	1.2	0	0	0	0
66	sensFLP GMRgal4 U-fsfmCD8GFP 25do p24h.nd2	4.18	4.13	0.64	0	0	0
67	sensFLP GMRgal4 U-fsfmCD8GFP 25do p24h.nd2	6.37	4.92	4.05	0	0	0
68	sensFLP GMRgal4 U-fsfmCD8GFP 25do p24h.nd2	0	0	0	0	0	0
69	sensFLP GMRgal4 U-fsfmCD8GFP 25do p24h.nd2	4.13	4.07	0.71	0	0	0
70	sensFLP GMRgal4 U-fsfmCD8GFP 25do p24h.nd2	1.75	1.13	1.33	0	0	0
71	sensFLP GMRgal4 U-fsfmCD8GFP 25do p24h.nd2	3.29	1.88	2.69	0	0	0
72	sensFLP GMRgal4 U-fsfmCD8GFP 25do p24h.nd2	4.01	0.37	3.99	0	0	0
73	sensFLP GMRgal4 U-fsfmCD8GFP 25do p24h.nd2	0	0	0	0	0	0
74	sensFLP GMRgal4 U-fsfmCD8GFP 25do p24h.nd2	0	0	0	0	0	0
75	sensFLP GMRgal4 U-fsfmCD8GFP 25do p24h.nd2	0.07	0.07	0	0	0	0
76	sensFLP GMRgal4 U-fsfmCD8GFP 25do p24h.nd2	4.81	2.67	4	0	0	0
77	sensFLP GMRgal4 U-fsfmCD8GFP 25do p24h.nd2	1.41	1.41	0	0	0	0
78	sensFLP GMRgal4 U-fsfmCD8GFP 25do p24h.nd2	32.57	32.11	5.45	0	0	0
79	sensFLP GMRgal4 U-fsfmCD8GFP 25do p24h.nd2	29.29	28.66	6.02	0	0	0
80	sensFLP GMRgal4 U-fsfmCD8GFP 25do p24h.nd2	15.42	15.42	0	0	0	0
81	sensFLP GMRgal4 U-fsfmCD8GFP 25do p24h.nd2	9.22	9.03	1.85	0	0	0
82	sensFLP GMRgal4 U-fsfmCD8GFP 25do p24h.nd2	11.67	10.57	4.93	0	0	0
83	sensFLP GMRgal4 U-fsfmCD8GFP 25do p24h.nd2	3.43	3.37	0.6	0	0	0
84	sensFLP GMRgal4 U-fsfmCD8GFP 25do p24h.nd2	0	0	0	0	0	0
85	sensFLP GMRgal4 U-fsfmCD8GFP 25do p24h.nd2	2.7	2.7	0.0006	0	0	0
86	sensFLP GMRgal4 U-fsfmCD8GFP 25do p24h.nd2	0.7	0.3	0.63	0	0	0
87	sensFLP GMRgal4 U-fsfmCD8GFP 25do p24h.nd2	12.54	11.26	5.53	0	0	0
88	sensFLP GMRgal4 U-fsfmCD8GFP 25do p24h.nd2	3.05	2.46	1.8	0	0	0
89	sensFLP GMRgal4 U-fsfmCD8GFP 25do p24h.nd2	0	0	0	0	0	0
90	sensFLP GMRgal4 U-fsfmCD8GFP 25do p24h.nd2	0.98	0.77	0.61	0	0	0
91	sensFLP GMRgal4 U-fsfmCD8GFP 25do p24h.nd2	0.36	0.36	0	0	0	0
92	sensFLP GMRgal4 U-fsfmCD8GFP 25do p24h.nd2	3.25	2.29	2.31	0	0	0
93	sensFLP GMRgal4 U-fsfmCD8GFP 25do p24h.nd2	0.31	0.11	0.29	0	0	0
94	sensFLP GMRgal4 U-fsfmCD8GFP 25do p24h.nd2	0	0	0	0	0	0
95	sensFLP GMRgal4 U-fsfmCD8GFP 25do p24h.nd2	3.16	2.05	2.4	0	0	0
96	sensFLP GMRgal4 U-fsfmCD8GFP 25do p24h.nd2	1	1	2e-05	0	0	0
97	sensFLP GMRgal4 U-fsfmCD8GFP 25do p24h.nd2	0.42	0.42	0.0003	0	0	0
98	sensFLP GMRgal4 U-fsfmCD8GFP 25do p24h.nd2	2.72	2.72	0	0	0	0
99	sensFLP GMRgal4 U-fsfmCD8GFP 25do p24h.nd2	4.73	4.56	1.26	0	0	0
100	sensFLP GMRgal4 U-fsfmCD8GFP 25do p24h.nd2	6.17	4.41	4.32	0	0	0
101	sensFLP GMRgal4 U-fsfmCD8GFP 25do p24h.nd2	3	3	0.002	0	0	0
102	sensFLP GMRgal4 U-fsfmCD8GFP 25do p24h.nd2	1.56	0.86	1.3	0	0	0
103	sensFLP GMRgal4 U-fsfmCD8GFP 25do p24h.nd2	6.98	6.85	1.34	0	0	0
104	sensFLP GMRgal4 U-fsfmCD8GFP 25do p24h.nd2	0	0	0	0	0	0
105	sensFLP GMRgal4 U-fsfmCD8GFP 25do p24h.nd2	2.43	2.43	0	0	0	0
106	sensFLP GMRgal4 U-fsfmCD8GFP 25do p24h.nd2	1.12	1.12	0	0	0	0
107	sensFLP GMRgal4 U-fsfmCD8GFP 25do p24h.nd2	0	0	0	0	0	0
108	sensFLP GMRgal4 U-fsfmCD8GFP 25do p24h.nd2	0.91	0.91	0	0	0	0
109	sensFLP GMRgal4 U-fsfmCD8GFP 25do p24h.nd2	0	0	0	0	0	0
110	sensFLP GMRgal4 U-fsfmCD8GFP 25do p24h.nd2	42.67	42.48	3.99	0	0	0
111	sensFLP GMRgal4 U-fsfmCD8GFP 25do p24h.nd2	10.09	9.89	2.04	0	0	0
112	sensFLP GMRgal4 U-fsfmCD8GFP 25do p24h.nd2	7.05	5.23	4.73	0	0	0
113	sensFLP GMRgal4 U-fsfmCD8GFP 25do p24h.nd2	11.48	10.76	4.02	0	0	0
114	sensFLP GMRgal4 U-fsfmCD8GFP 25do p24h.nd2	12.33	12.03	2.72	0	0	0
115	sensFLP GMRgal4 U-fsfmCD8GFP 25do p24h.nd2	9.53	9.44	1.32	0	0	0
116	sensFLP GMRgal4 U-fsfmCD8GFP 25do p24h.nd2	23.38	22.76	5.34	0	0	0
117	sensFLP GMRgal4 U-fsfmCD8GFP 25do p24h.nd2	10.02	10.02	0	0	0	0
118	sensFLP GMRgal4 U-fsfmCD8GFP 25do p24h.nd2	0	0	0	0	0	0
119	sensFLP GMRgal4 U-fsfmCD8GFP 25do p24h.nd2	0	0	0	0	0	0
120	sensFLP GMRgal4 U-fsfmCD8GFP 25do p24h.nd2	0	0	0	0	0	0
121	sensFLP GMRgal4 U-fsfmCD8GFP 25do p24h.nd2	0.6	0.15	0.58	0	0	0
122	sensFLP GMRgal4 U-fsfmCD8GFP 25do p24h.nd2	7.23	5.94	4.13	0	0	0
123	sensFLP GMRgal4 U-fsfmCD8GFP 25do p24h.nd2	5.23	5.2	0.61	0	0	0
124	sensFLP GMRgal4 U-fsfmCD8GFP 25do p24h.nd2	0	0	0	0	0	0
125	sensFLP GMRgal4 U-fsfmCD8GFP 25do p24h.nd2	5.36	5.02	1.88	0	0	0
126	sensFLP GMRgal4 U-fsfmCD8GFP 25do p24h.nd2	0.27	0.27	4e-05	0	0	0
127	sensFLP GMRgal4 U-fsfmCD8GFP 25do p24h.nd2	0.8	0.8	0	0	0	0
128	sensFLP GMRgal4 U-fsfmCD8GFP 25do p24h.nd2	16.18	15.96	2.68	0	0	0
129	sensFLP GMRgal4 U-fsfmCD8GFP 25do p24h.nd2	11.52	11.5	0.62	0	0	0
130	sensFLP GMRgal4 U-fsfmCD8GFP 25do p24h.nd2	0	0	0	0	0	0
131	sensFLP GMRgal4 U-fsfmCD8GFP 25do p24h.nd2	12.15	12.14	0.59	0	0	0
132	sensFLP GMRgal4 U-fsfmCD8GFP 25do p24h.nd2	10.19	10.17	0.58	0	0	0
133	sensFLP GMRgal4 U-fsfmCD8GFP 25do p24h.nd2	0	0	0	0	0	0
134	sensFLP GMRgal4 U-fsfmCD8GFP 25do p24h.nd2	0	0	0	0	0	0
135	sensFLP GMRgal4 U-fsfmCD8GFP 25do p24h.nd2	3.87	3.69	1.15	0	0	0
136	sensFLP GMRgal4 U-fsfmCD8GFP 25do p24h.nd2	0	0	0	0	0	0
137	sensFLP GMRgal4 U-fsfmCD8GFP 25do p24h.nd2	0.19	0.19	0.002	0	0	0
138	sensFLP GMRgal4 U-fsfmCD8GFP 25do p24h.nd2	13.19	13.19	0.04	0	0	0
139	sensFLP GMRgal4 U-fsfmCD8GFP 25do p24h.nd2	5.6	5.44	1.37	0	0	0
140	sensFLP GMRgal4 U-fsfmCD8GFP 25do p24h.nd2	0.3	0.3	0.0006	0	0	0
141	sensFLP GMRgal4 U-fsfmCD8GFP 25do p24h.nd2	0	0	0	0	0	0
Feature	Mean	St.Dev	Minimum	Maximum
Length xyz	5.88	8.64	0	56.15
Length xy	5.46	8.55	0	55.42
Height	1.4	2.08	0	9
Item	Source	Length xyz	Length xy	Height	ND.T	ND.Z	ND.M	Comment
1	sensFLP GMRgal4 U-fsfmCD8GFP 25do p24h001.nd2	0.84	0.8	0.28	0	0	0
2	sensFLP GMRgal4 U-fsfmCD8GFP 25do p24h001.nd2	2.98	2.65	1.35	0	0	0
3	sensFLP GMRgal4 U-fsfmCD8GFP 25do p24h001.nd2	0	0	0	0	0	0
4	sensFLP GMRgal4 U-fsfmCD8GFP 25do p24h001.nd2	0	0	0	0	0	0
5	sensFLP GMRgal4 U-fsfmCD8GFP 25do p24h001.nd2	9.09	5.6	7.16	0	0	0
6	sensFLP GMRgal4 U-fsfmCD8GFP 25do p24h001.nd2	1.8	1.64	0.73	0	0	0
7	sensFLP GMRgal4 U-fsfmCD8GFP 25do p24h001.nd2	9.89	9.89	0.01	0	0	0
8	sensFLP GMRgal4 U-fsfmCD8GFP 25do p24h001.nd2	0	0	0	0	0	0
9	sensFLP GMRgal4 U-fsfmCD8GFP 25do p24h001.nd2	0	0	0	0	0	0
10	sensFLP GMRgal4 U-fsfmCD8GFP 25do p24h001.nd2	7.08	7.08	0.03	0	0	0
11	sensFLP GMRgal4 U-fsfmCD8GFP 25do p24h001.nd2	7.99	7.99	0	0	0	0
12	sensFLP GMRgal4 U-fsfmCD8GFP 25do p24h001.nd2	4.1	2.47	3.27	0	0	0
13	sensFLP GMRgal4 U-fsfmCD8GFP 25do p24h001.nd2	0	0	0	0	0	0
14	sensFLP GMRgal4 U-fsfmCD8GFP 25do p24h001.nd2	0	0	0	0	0	0
15	sensFLP GMRgal4 U-fsfmCD8GFP 25do p24h001.nd2	0	0	0	0	0	0
16	sensFLP GMRgal4 U-fsfmCD8GFP 25do p24h001.nd2	14.59	14.49	1.69	0	0	0
17	sensFLP GMRgal4 U-fsfmCD8GFP 25do p24h001.nd2	5.76	4.84	3.12	0	0	0
18	sensFLP GMRgal4 U-fsfmCD8GFP 25do p24h001.nd2	15.12	14.65	3.73	0	0	0
19	sensFLP GMRgal4 U-fsfmCD8GFP 25do p24h001.nd2	8.59	8.01	3.1	0	0	0
20	sensFLP GMRgal4 U-fsfmCD8GFP 25do p24h001.nd2	2.08	1.91	0.83	0	0	0
21	sensFLP GMRgal4 U-fsfmCD8GFP 25do p24h001.nd2	2.19	2.19	0.0009	0	0	0
22	sensFLP GMRgal4 U-fsfmCD8GFP 25do p24h001.nd2	3.2	3.09	0.81	0	0	0
23	sensFLP GMRgal4 U-fsfmCD8GFP 25do p24h001.nd2	0	0	0	0	0	0
24	sensFLP GMRgal4 U-fsfmCD8GFP 25do p24h001.nd2	7.35	7.31	0.75	0	0	0
25	sensFLP GMRgal4 U-fsfmCD8GFP 25do p24h001.nd2	2.81	2.81	0.01	0	0	0
26	sensFLP GMRgal4 U-fsfmCD8GFP 25do p24h001.nd2	2.19	2.19	0.01	0	0	0
27	sensFLP GMRgal4 U-fsfmCD8GFP 25do p24h001.nd2	1.88	1.71	0.78	0	0	0
28	sensFLP GMRgal4 U-fsfmCD8GFP 25do p24h001.nd2	3.8	3.72	0.75	0	0	0
29	sensFLP GMRgal4 U-fsfmCD8GFP 25do p24h001.nd2	1.87	1.87	0.01	0	0	0
30	sensFLP GMRgal4 U-fsfmCD8GFP 25do p24h001.nd2	3.01	2.09	2.17	0	0	0
31	sensFLP GMRgal4 U-fsfmCD8GFP 25do p24h001.nd2	10.17	10.17	0.03	0	0	0
32	sensFLP GMRgal4 U-fsfmCD8GFP 25do p24h001.nd2	16.64	16.59	1.29	0	0	0
33	sensFLP GMRgal4 U-fsfmCD8GFP 25do p24h001.nd2	16.45	16.45	0.3	0	0	0
34	sensFLP GMRgal4 U-fsfmCD8GFP 25do p24h001.nd2	17.95	17.95	0.06	0	0	0
35	sensFLP GMRgal4 U-fsfmCD8GFP 25do p24h001.nd2	19.12	19.12	0.03	0	0	0
36	sensFLP GMRgal4 U-fsfmCD8GFP 25do p24h001.nd2	10.65	10.49	1.8	0	0	0
37	sensFLP GMRgal4 U-fsfmCD8GFP 25do p24h001.nd2	7.77	7.77	0	0	0	0
38	sensFLP GMRgal4 U-fsfmCD8GFP 25do p24h001.nd2	16.24	16.22	0.89	0	0	0
39	sensFLP GMRgal4 U-fsfmCD8GFP 25do p24h001.nd2	22.38	22.21	2.7	0	0	0
40	sensFLP GMRgal4 U-fsfmCD8GFP 25do p24h001.nd2	12.78	12.75	0.88	0	0	0
41	sensFLP GMRgal4 U-fsfmCD8GFP 25do p24h001.nd2	9.17	8.04	4.41	0	0	0
42	sensFLP GMRgal4 U-fsfmCD8GFP 25do p24h001.nd2	2.32	2.32	0	0	0	0
43	sensFLP GMRgal4 U-fsfmCD8GFP 25do p24h001.nd2	0	0	0	0	0	0
44	sensFLP GMRgal4 U-fsfmCD8GFP 25do p24h001.nd2	0	0	0	0	0	0
45	sensFLP GMRgal4 U-fsfmCD8GFP 25do p24h001.nd2	0	0	0	0	0	0
46	sensFLP GMRgal4 U-fsfmCD8GFP 25do p24h001.nd2	4.93	4.93	0	0	0	0
47	sensFLP GMRgal4 U-fsfmCD8GFP 25do p24h001.nd2	0	0	0	0	0	0
48	sensFLP GMRgal4 U-fsfmCD8GFP 25do p24h001.nd2	5.87	5.87	0	0	0	0
49	sensFLP GMRgal4 U-fsfmCD8GFP 25do p24h001.nd2	11.48	11.48	0	0	0	0
50	sensFLP GMRgal4 U-fsfmCD8GFP 25do p24h001.nd2	5.37	5.37	0	0	0	0
51	sensFLP GMRgal4 U-fsfmCD8GFP 25do p24h001.nd2	1.08	1.08	0	0	0	0
52	sensFLP GMRgal4 U-fsfmCD8GFP 25do p24h001.nd2	0	0	0	0	0	0
53	sensFLP GMRgal4 U-fsfmCD8GFP 25do p24h001.nd2	1.04	1.04	0	0	0	0
54	sensFLP GMRgal4 U-fsfmCD8GFP 25do p24h001.nd2	0	0	0	0	0	0
55	sensFLP GMRgal4 U-fsfmCD8GFP 25do p24h001.nd2	3.02	3.02	0	0	0	0
56	sensFLP GMRgal4 U-fsfmCD8GFP 25do p24h001.nd2	4.21	2.18	3.6	0	0	0
57	sensFLP GMRgal4 U-fsfmCD8GFP 25do p24h001.nd2	0	0	0	0	0	0
58	sensFLP GMRgal4 U-fsfmCD8GFP 25do p24h001.nd2	2.25	2.25	0	0	0	0
59	sensFLP GMRgal4 U-fsfmCD8GFP 25do p24h001.nd2	0	0	0	0	0	0
60	sensFLP GMRgal4 U-fsfmCD8GFP 25do p24h001.nd2	21.04	20.75	3.46	0	0	0
61	sensFLP GMRgal4 U-fsfmCD8GFP 25do p24h001.nd2	1.97	1.97	0.002	0	0	0
62	sensFLP GMRgal4 U-fsfmCD8GFP 25do p24h001.nd2	4	3.9	0.89	0	0	0
63	sensFLP GMRgal4 U-fsfmCD8GFP 25do p24h001.nd2	0	0	0	0	0	0
64	sensFLP GMRgal4 U-fsfmCD8GFP 25do p24h001.nd2	0.95	0.33	0.89	0	0	0
65	sensFLP GMRgal4 U-fsfmCD8GFP 25do p24h001.nd2	4.59	4.51	0.88	0	0	0
66	sensFLP GMRgal4 U-fsfmCD8GFP 25do p24h001.nd2	10.79	9.84	4.45	0	0	0
67	sensFLP GMRgal4 U-fsfmCD8GFP 25do p24h001.nd2	8.14	6.17	5.31	0	0	0
68	sensFLP GMRgal4 U-fsfmCD8GFP 25do p24h001.nd2	0	0	0	0	0	0
69	sensFLP GMRgal4 U-fsfmCD8GFP 25do p24h001.nd2	0.29	0.29	0.02	0	0	0
70	sensFLP GMRgal4 U-fsfmCD8GFP 25do p24h001.nd2	0	0	0	0	0	0
71	sensFLP GMRgal4 U-fsfmCD8GFP 25do p24h001.nd2	0	0	0	0	0	0
72	sensFLP GMRgal4 U-fsfmCD8GFP 25do p24h001.nd2	2.47	1.82	1.67	0	0	0
73	sensFLP GMRgal4 U-fsfmCD8GFP 25do p24h001.nd2	3e-05	3e-05	0	0	0	0
74	sensFLP GMRgal4 U-fsfmCD8GFP 25do p24h001.nd2	4.82	2.08	4.35	0	0	0
75	sensFLP GMRgal4 U-fsfmCD8GFP 25do p24h001.nd2	0	0	0	0	0	0
76	sensFLP GMRgal4 U-fsfmCD8GFP 25do p24h001.nd2	1.87	1.67	0.84	0	0	0
77	sensFLP GMRgal4 U-fsfmCD8GFP 25do p24h001.nd2	3.31	2.86	1.66	0	0	0
78	sensFLP GMRgal4 U-fsfmCD8GFP 25do p24h001.nd2	0.09	0.09	0.0005	0	0	0
79	sensFLP GMRgal4 U-fsfmCD8GFP 25do p24h001.nd2	0.42	0.42	0.005	0	0	0
80	sensFLP GMRgal4 U-fsfmCD8GFP 25do p24h001.nd2	11.82	11.78	0.92	0	0	0
81	sensFLP GMRgal4 U-fsfmCD8GFP 25do p24h001.nd2	2.4	2.3	0.7	0	0	0
82	sensFLP GMRgal4 U-fsfmCD8GFP 25do p24h001.nd2	5.67	3.6	4.38	0	0	0
83	sensFLP GMRgal4 U-fsfmCD8GFP 25do p24h001.nd2	0	0	0	0	0	0
84	sensFLP GMRgal4 U-fsfmCD8GFP 25do p24h001.nd2	1.71	1.55	0.72	0	0	0
85	sensFLP GMRgal4 U-fsfmCD8GFP 25do p24h001.nd2	0.98	0.98	0	0	0	0
86	sensFLP GMRgal4 U-fsfmCD8GFP 25do p24h001.nd2	0.38	0.38	0.002	0	0	0
87	sensFLP GMRgal4 U-fsfmCD8GFP 25do p24h001.nd2	0.27	0.27	0.003	0	0	0
88	sensFLP GMRgal4 U-fsfmCD8GFP 25do p24h001.nd2	1.84	1.66	0.8	0	0	0
89	sensFLP GMRgal4 U-fsfmCD8GFP 25do p24h001.nd2	0.93	0.48	0.8	0	0	0
90	sensFLP GMRgal4 U-fsfmCD8GFP 25do p24h001.nd2	0	0	0	0	0	0
91	sensFLP GMRgal4 U-fsfmCD8GFP 25do p24h001.nd2	0	0	0	0	0	0
92	sensFLP GMRgal4 U-fsfmCD8GFP 25do p24h001.nd2	0	0	0	0	0	0
93	sensFLP GMRgal4 U-fsfmCD8GFP 25do p24h001.nd2	0	0	0	0	0	0
94	sensFLP GMRgal4 U-fsfmCD8GFP 25do p24h001.nd2	0	0	0	0	0	0
95	sensFLP GMRgal4 U-fsfmCD8GFP 25do p24h001.nd2	11.2	10.7	3.33	0	0	0
96	sensFLP GMRgal4 U-fsfmCD8GFP 25do p24h001.nd2	3.57	3.5	0.73	0	0	0
97	sensFLP GMRgal4 U-fsfmCD8GFP 25do p24h001.nd2	6.11	5.88	1.67	0	0	0
98	sensFLP GMRgal4 U-fsfmCD8GFP 25do p24h001.nd2	0	0	0	0	0	0
99	sensFLP GMRgal4 U-fsfmCD8GFP 25do p24h001.nd2	30.79	30.21	5.94	0	0	0
100	sensFLP GMRgal4 U-fsfmCD8GFP 25do p24h001.nd2	8.69	7.62	4.18	0	0	0
101	sensFLP GMRgal4 U-fsfmCD8GFP 25do p24h001.nd2	10.65	10.63	0.73	0	0	0
102	sensFLP GMRgal4 U-fsfmCD8GFP 25do p24h001.nd2	5.35	4.38	3.08	0	0	0
103	sensFLP GMRgal4 U-fsfmCD8GFP 25do p24h001.nd2	7.81	6.65	4.1	0	0	0
104	sensFLP GMRgal4 U-fsfmCD8GFP 25do p24h001.nd2	27.15	27.13	0.84	0	0	0
105	sensFLP GMRgal4 U-fsfmCD8GFP 25do p24h001.nd2	9.58	2.88	9.14	0	0	0
106	sensFLP GMRgal4 U-fsfmCD8GFP 25do p24h001.nd2	10.03	9.48	3.26	0	0	0
107	sensFLP GMRgal4 U-fsfmCD8GFP 25do p24h001.nd2	12.79	12.77	0.67	0	0	0
108	sensFLP GMRgal4 U-fsfmCD8GFP 25do p24h001.nd2	14.81	14.36	3.62	0	0	0
109	sensFLP GMRgal4 U-fsfmCD8GFP 25do p24h001.nd2	9.56	9.46	1.41	0	0	0
110	sensFLP GMRgal4 U-fsfmCD8GFP 25do p24h001.nd2	6.81	6.81	0	0	0	0
111	sensFLP GMRgal4 U-fsfmCD8GFP 25do p24h001.nd2	4.83	3.64	3.19	0	0	0
112	sensFLP GMRgal4 U-fsfmCD8GFP 25do p24h001.nd2	2.57	1.05	2.35	0	0	0
113	sensFLP GMRgal4 U-fsfmCD8GFP 25do p24h001.nd2	9.74	3.32	9.15	0	0	0
114	sensFLP GMRgal4 U-fsfmCD8GFP 25do p24h001.nd2	8.12	3.21	7.46	0	0	0
115	sensFLP GMRgal4 U-fsfmCD8GFP 25do p24h001.nd2	0	0	0	0	0	0
116	sensFLP GMRgal4 U-fsfmCD8GFP 25do p24h001.nd2	1.19	0.68	0.98	0	0	0
117	sensFLP GMRgal4 U-fsfmCD8GFP 25do p24h001.nd2	0	0	0	0	0	0
118	sensFLP GMRgal4 U-fsfmCD8GFP 25do p24h001.nd2	3.16	0.13	3.16	0	0	0
119	sensFLP GMRgal4 U-fsfmCD8GFP 25do p24h001.nd2	10.42	9.65	3.95	0	0	0
120	sensFLP GMRgal4 U-fsfmCD8GFP 25do p24h001.nd2	9.05	8.91	1.59	0	0	0
121	sensFLP GMRgal4 U-fsfmCD8GFP 25do p24h001.nd2	0	0	0	0	0	0
122	sensFLP GMRgal4 U-fsfmCD8GFP 25do p24h001.nd2	3.57	1.23	3.35	0	0	0
123	sensFLP GMRgal4 U-fsfmCD8GFP 25do p24h001.nd2	24.48	24.04	4.64	0	0	0
124	sensFLP GMRgal4 U-fsfmCD8GFP 25do p24h001.nd2	7.65	4.02	6.51	0	0	0
125	sensFLP GMRgal4 U-fsfmCD8GFP 25do p24h001.nd2	0	0	0	0	0	0
126	sensFLP GMRgal4 U-fsfmCD8GFP 25do p24h001.nd2	7.4	7.4	0	0	0	0
127	sensFLP GMRgal4 U-fsfmCD8GFP 25do p24h001.nd2	3.84	3.84	0	0	0	0
128	sensFLP GMRgal4 U-fsfmCD8GFP 25do p24h001.nd2	10.69	6.74	8.29	0	0	0
129	sensFLP GMRgal4 U-fsfmCD8GFP 25do p24h001.nd2	2.25	0.2	2.25	0	0	0
130	sensFLP GMRgal4 U-fsfmCD8GFP 25do p24h001.nd2	3.62	3.51	0.87	0	0	0
131	sensFLP GMRgal4 U-fsfmCD8GFP 25do p24h001.nd2	3.79	3.35	1.76	0	0	0
132	sensFLP GMRgal4 U-fsfmCD8GFP 25do p24h001.nd2	0	0	0	0	0	0
133	sensFLP GMRgal4 U-fsfmCD8GFP 25do p24h001.nd2	3.17	2.65	1.74	0	0	0
134	sensFLP GMRgal4 U-fsfmCD8GFP 25do p24h001.nd2	0	0	0	0	0	0
135	sensFLP GMRgal4 U-fsfmCD8GFP 25do p24h001.nd2	0.3	0.3	0	0	0	0
136	sensFLP GMRgal4 U-fsfmCD8GFP 25do p24h001.nd2	2.18	2.18	0	0	0	0
137	sensFLP GMRgal4 U-fsfmCD8GFP 25do p24h001.nd2	34.69	33.71	8.19	0	0	0
138	sensFLP GMRgal4 U-fsfmCD8GFP 25do p24h001.nd2	0	0	0	0	0	0
139	sensFLP GMRgal4 U-fsfmCD8GFP 25do p24h001.nd2	8.9	8.55	2.48	0	0	0
140	sensFLP GMRgal4 U-fsfmCD8GFP 25do p24h001.nd2	9.66	8.62	4.37	0	0	0
141	sensFLP GMRgal4 U-fsfmCD8GFP 25do p24h001.nd2	0	0	0	0	0	0
142	sensFLP GMRgal4 U-fsfmCD8GFP 25do p24h001.nd2	5.21	3.77	3.61	0	0	0
143	sensFLP GMRgal4 U-fsfmCD8GFP 25do p24h001.nd2	4.31	4.22	0.86	0	0	0
144	sensFLP GMRgal4 U-fsfmCD8GFP 25do p24h001.nd2	12.87	12.87	0.02	0	0	0
Feature	Mean	St.Dev	Minimum	Maximum
Length xyz	5.43	6.54	0	34.69
Length xy	4.93	6.45	0	33.71
Height	1.41	2.09	0	9.15
Item	Source	Length xyz	Length xy	Height	ND.T	ND.Z	ND.M	Comment
1	sensFLP GMRgal4 U-fsfmCD8GFP 25do p24h003.nd2	0	0	0	0	0	0
2	sensFLP GMRgal4 U-fsfmCD8GFP 25do p24h003.nd2	13.23	13.21	0.73	0	0	0
3	sensFLP GMRgal4 U-fsfmCD8GFP 25do p24h003.nd2	0	0	0	0	0	0
4	sensFLP GMRgal4 U-fsfmCD8GFP 25do p24h003.nd2	5.27	5.06	1.46	0	0	0
5	sensFLP GMRgal4 U-fsfmCD8GFP 25do p24h003.nd2	3.48	3.48	0	0	0	0
6	sensFLP GMRgal4 U-fsfmCD8GFP 25do p24h003.nd2	1.24	1.24	0.002	0	0	0
7	sensFLP GMRgal4 U-fsfmCD8GFP 25do p24h003.nd2	5.21	4.69	2.26	0	0	0
8	sensFLP GMRgal4 U-fsfmCD8GFP 25do p24h003.nd2	0	0	0	0	0	0
9	sensFLP GMRgal4 U-fsfmCD8GFP 25do p24h003.nd2	9.12	8.49	3.35	0	0	0
10	sensFLP GMRgal4 U-fsfmCD8GFP 25do p24h003.nd2	0.47	0.47	3e-05	0	0	0
11	sensFLP GMRgal4 U-fsfmCD8GFP 25do p24h003.nd2	6.72	6.72	0	0	0	0
12	sensFLP GMRgal4 U-fsfmCD8GFP 25do p24h003.nd2	20.92	20.14	5.66	0	0	0
13	sensFLP GMRgal4 U-fsfmCD8GFP 25do p24h003.nd2	5.73	5.73	0.01	0	0	0
14	sensFLP GMRgal4 U-fsfmCD8GFP 25do p24h003.nd2	6.26	4.34	4.51	0	0	0
15	sensFLP GMRgal4 U-fsfmCD8GFP 25do p24h003.nd2	6	5.73	1.78	0	0	0
16	sensFLP GMRgal4 U-fsfmCD8GFP 25do p24h003.nd2	0	0	0	0	0	0
17	sensFLP GMRgal4 U-fsfmCD8GFP 25do p24h003.nd2	7.43	4.13	6.18	0	0	0
18	sensFLP GMRgal4 U-fsfmCD8GFP 25do p24h003.nd2	0	0	0	0	0	0
19	sensFLP GMRgal4 U-fsfmCD8GFP 25do p24h003.nd2	28.66	28.64	0.97	0	0	0
20	sensFLP GMRgal4 U-fsfmCD8GFP 25do p24h003.nd2	0	0	0	0	0	0
21	sensFLP GMRgal4 U-fsfmCD8GFP 25do p24h003.nd2	7.23	4.93	5.3	0	0	0
22	sensFLP GMRgal4 U-fsfmCD8GFP 25do p24h003.nd2	12.36	11.87	3.44	0	0	0
23	sensFLP GMRgal4 U-fsfmCD8GFP 25do p24h003.nd2	8.37	8.32	0.88	0	0	0
24	sensFLP GMRgal4 U-fsfmCD8GFP 25do p24h003.nd2	9.75	9.14	3.39	0	0	0
25	sensFLP GMRgal4 U-fsfmCD8GFP 25do p24h003.nd2	12.42	12.42	0.02	0	0	0
26	sensFLP GMRgal4 U-fsfmCD8GFP 25do p24h003.nd2	12.15	11.06	5.04	0	0	0
27	sensFLP GMRgal4 U-fsfmCD8GFP 25do p24h003.nd2	0.84	0.1	0.84	0	0	0
28	sensFLP GMRgal4 U-fsfmCD8GFP 25do p24h003.nd2	0	0	0	0	0	0
29	sensFLP GMRgal4 U-fsfmCD8GFP 25do p24h003.nd2	8.92	8.92	0.03	0	0	0
30	sensFLP GMRgal4 U-fsfmCD8GFP 25do p24h003.nd2	8.87	8.87	0.002	0	0	0
31	sensFLP GMRgal4 U-fsfmCD8GFP 25do p24h003.nd2	4.57	4.57	0.004	0	0	0
32	sensFLP GMRgal4 U-fsfmCD8GFP 25do p24h003.nd2	7.86	7.38	2.72	0	0	0
33	sensFLP GMRgal4 U-fsfmCD8GFP 25do p24h003.nd2	5.44	5.36	0.93	0	0	0
34	sensFLP GMRgal4 U-fsfmCD8GFP 25do p24h003.nd2	12.17	9.01	8.18	0	0	0
35	sensFLP GMRgal4 U-fsfmCD8GFP 25do p24h003.nd2	4.82	4.46	1.82	0	0	0
36	sensFLP GMRgal4 U-fsfmCD8GFP 25do p24h003.nd2	18.51	18.43	1.73	0	0	0
37	sensFLP GMRgal4 U-fsfmCD8GFP 25do p24h003.nd2	9.7	8.58	4.54	0	0	0
38	sensFLP GMRgal4 U-fsfmCD8GFP 25do p24h003.nd2	14.33	14.06	2.78	0	0	0
39	sensFLP GMRgal4 U-fsfmCD8GFP 25do p24h003.nd2	27.19	27.15	1.46	0	0	0
40	sensFLP GMRgal4 U-fsfmCD8GFP 25do p24h003.nd2	14.08	13.7	3.24	0	0	0
41	sensFLP GMRgal4 U-fsfmCD8GFP 25do p24h003.nd2	2.74	2.62	0.78	0	0	0
42	sensFLP GMRgal4 U-fsfmCD8GFP 25do p24h003.nd2	4.72	4.45	1.57	0	0	0
43	sensFLP GMRgal4 U-fsfmCD8GFP 25do p24h003.nd2	19.79	19.77	0.96	0	0	0
44	sensFLP GMRgal4 U-fsfmCD8GFP 25do p24h003.nd2	18.74	18.71	0.87	0	0	0
45	sensFLP GMRgal4 U-fsfmCD8GFP 25do p24h003.nd2	3.33	3.2	0.93	0	0	0
46	sensFLP GMRgal4 U-fsfmCD8GFP 25do p24h003.nd2	9.66	8.92	3.71	0	0	0
47	sensFLP GMRgal4 U-fsfmCD8GFP 25do p24h003.nd2	10.38	10.21	1.86	0	0	0
48	sensFLP GMRgal4 U-fsfmCD8GFP 25do p24h003.nd2	1.29	0.9	0.93	0	0	0
49	sensFLP GMRgal4 U-fsfmCD8GFP 25do p24h003.nd2	6.25	5.97	1.85	0	0	0
50	sensFLP GMRgal4 U-fsfmCD8GFP 25do p24h003.nd2	6.49	6.21	1.86	0	0	0
51	sensFLP GMRgal4 U-fsfmCD8GFP 25do p24h003.nd2	4.27	4.27	0.02	0	0	0
52	sensFLP GMRgal4 U-fsfmCD8GFP 25do p24h003.nd2	3.49	3.49	0	0	0	0
53	sensFLP GMRgal4 U-fsfmCD8GFP 25do p24h003.nd2	5.41	5.32	0.94	0	0	0
54	sensFLP GMRgal4 U-fsfmCD8GFP 25do p24h003.nd2	0	0	0	0	0	0
55	sensFLP GMRgal4 U-fsfmCD8GFP 25do p24h003.nd2	0	0	0	0	0	0
56	sensFLP GMRgal4 U-fsfmCD8GFP 25do p24h003.nd2	0	0	0	0	0	0
57	sensFLP GMRgal4 U-fsfmCD8GFP 25do p24h003.nd2	1.25	0.85	0.92	0	0	0
58	sensFLP GMRgal4 U-fsfmCD8GFP 25do p24h003.nd2	7.73	7.73	0	0	0	0
59	sensFLP GMRgal4 U-fsfmCD8GFP 25do p24h003.nd2	9.65	9.65	0	0	0	0
60	sensFLP GMRgal4 U-fsfmCD8GFP 25do p24h003.nd2	5.69	5.69	0	0	0	0
61	sensFLP GMRgal4 U-fsfmCD8GFP 25do p24h003.nd2	0	0	0	0	0	0
62	sensFLP GMRgal4 U-fsfmCD8GFP 25do p24h003.nd2	0	0	0	0	0	0
63	sensFLP GMRgal4 U-fsfmCD8GFP 25do p24h003.nd2	2.35	2.35	0	0	0	0
64	sensFLP GMRgal4 U-fsfmCD8GFP 25do p24h003.nd2	0	0	0	0	0	0
65	sensFLP GMRgal4 U-fsfmCD8GFP 25do p24h003.nd2	3.95	3.48	1.86	0	0	0
66	sensFLP GMRgal4 U-fsfmCD8GFP 25do p24h003.nd2	0	0	0	0	0	0
67	sensFLP GMRgal4 U-fsfmCD8GFP 25do p24h003.nd2	10.81	10.65	1.86	0	0	0
68	sensFLP GMRgal4 U-fsfmCD8GFP 25do p24h003.nd2	0.29	0.29	0	0	0	0
69	sensFLP GMRgal4 U-fsfmCD8GFP 25do p24h003.nd2	3.3	3.3	0	0	0	0
70	sensFLP GMRgal4 U-fsfmCD8GFP 25do p24h003.nd2	12.13	12.13	0.06	0	0	0
71	sensFLP GMRgal4 U-fsfmCD8GFP 25do p24h003.nd2	4.94	4.11	2.74	0	0	0
72	sensFLP GMRgal4 U-fsfmCD8GFP 25do p24h003.nd2	0	0	0	0	0	0
73	sensFLP GMRgal4 U-fsfmCD8GFP 25do p24h003.nd2	6	5.33	2.77	0	0	0
74	sensFLP GMRgal4 U-fsfmCD8GFP 25do p24h003.nd2	14.55	13.8	4.62	0	0	0
75	sensFLP GMRgal4 U-fsfmCD8GFP 25do p24h003.nd2	5.56	5.56	0.01	0	0	0
76	sensFLP GMRgal4 U-fsfmCD8GFP 25do p24h003.nd2	6.75	6.69	0.91	0	0	0
77	sensFLP GMRgal4 U-fsfmCD8GFP 25do p24h003.nd2	16.36	15.96	3.6	0	0	0
78	sensFLP GMRgal4 U-fsfmCD8GFP 25do p24h003.nd2	3.77	3.66	0.87	0	0	0
79	sensFLP GMRgal4 U-fsfmCD8GFP 25do p24h003.nd2	7.22	6.36	3.42	0	0	0
80	sensFLP GMRgal4 U-fsfmCD8GFP 25do p24h003.nd2	0	0	0	0	0	0
81	sensFLP GMRgal4 U-fsfmCD8GFP 25do p24h003.nd2	0	0	0	0	0	0
82	sensFLP GMRgal4 U-fsfmCD8GFP 25do p24h003.nd2	8.95	7.76	4.47	0	0	0
83	sensFLP GMRgal4 U-fsfmCD8GFP 25do p24h003.nd2	1.89	0.66	1.77	0	0	0
84	sensFLP GMRgal4 U-fsfmCD8GFP 25do p24h003.nd2	0	0	0	0	0	0
85	sensFLP GMRgal4 U-fsfmCD8GFP 25do p24h003.nd2	5.74	5.68	0.8	0	0	0
86	sensFLP GMRgal4 U-fsfmCD8GFP 25do p24h003.nd2	7.1	7.1	0.02	0	0	0
87	sensFLP GMRgal4 U-fsfmCD8GFP 25do p24h003.nd2	30.04	30.04	0.57	0	0	0
88	sensFLP GMRgal4 U-fsfmCD8GFP 25do p24h003.nd2	10.45	8.59	5.95	0	0	0
89	sensFLP GMRgal4 U-fsfmCD8GFP 25do p24h003.nd2	9.85	8.36	5.21	0	0	0
90	sensFLP GMRgal4 U-fsfmCD8GFP 25do p24h003.nd2	17.22	16.95	3.01	0	0	0
91	sensFLP GMRgal4 U-fsfmCD8GFP 25do p24h003.nd2	2.76	2.76	0	0	0	0
92	sensFLP GMRgal4 U-fsfmCD8GFP 25do p24h003.nd2	4.31	2.5	3.52	0	0	0
93	sensFLP GMRgal4 U-fsfmCD8GFP 25do p24h003.nd2	24.09	23.29	6.14	0	0	0
94	sensFLP GMRgal4 U-fsfmCD8GFP 25do p24h003.nd2	12.46	12.46	0.19	0	0	0
95	sensFLP GMRgal4 U-fsfmCD8GFP 25do p24h003.nd2	3.86	2.9	2.55	0	0	0
96	sensFLP GMRgal4 U-fsfmCD8GFP 25do p24h003.nd2	1.23	0.9	0.84	0	0	0
97	sensFLP GMRgal4 U-fsfmCD8GFP 25do p24h003.nd2	12.42	11.38	4.99	0	0	0
98	sensFLP GMRgal4 U-fsfmCD8GFP 25do p24h003.nd2	4.83	2.18	4.31	0	0	0
99	sensFLP GMRgal4 U-fsfmCD8GFP 25do p24h003.nd2	0	0	0	0	0	0
100	sensFLP GMRgal4 U-fsfmCD8GFP 25do p24h003.nd2	6.43	5.38	3.53	0	0	0
101	sensFLP GMRgal4 U-fsfmCD8GFP 25do p24h003.nd2	0	0	0	0	0	0
102	sensFLP GMRgal4 U-fsfmCD8GFP 25do p24h003.nd2	5.91	5.91	0.03	0	0	0
103	sensFLP GMRgal4 U-fsfmCD8GFP 25do p24h003.nd2	1.89	0.64	1.77	0	0	0
104	sensFLP GMRgal4 U-fsfmCD8GFP 25do p24h003.nd2	3.91	3.46	1.82	0	0	0
105	sensFLP GMRgal4 U-fsfmCD8GFP 25do p24h003.nd2	0	0	0	0	0	0
106	sensFLP GMRgal4 U-fsfmCD8GFP 25do p24h003.nd2	6.65	6.41	1.77	0	0	0
107	sensFLP GMRgal4 U-fsfmCD8GFP 25do p24h003.nd2	4.6	2.85	3.61	0	0	0
108	sensFLP GMRgal4 U-fsfmCD8GFP 25do p24h003.nd2	9.49	9.49	0.06	0	0	0
109	sensFLP GMRgal4 U-fsfmCD8GFP 25do p24h003.nd2	0	0	0	0	0	0
110	sensFLP GMRgal4 U-fsfmCD8GFP 25do p24h003.nd2	13.77	13.66	1.75	0	0	0
111	sensFLP GMRgal4 U-fsfmCD8GFP 25do p24h003.nd2	0	0	0	0	0	0
112	sensFLP GMRgal4 U-fsfmCD8GFP 25do p24h003.nd2	0	0	0	0	0	0
113	sensFLP GMRgal4 U-fsfmCD8GFP 25do p24h003.nd2	0	0	0	0	0	0
114	sensFLP GMRgal4 U-fsfmCD8GFP 25do p24h003.nd2	12.53	12.39	1.89	0	0	0
115	sensFLP GMRgal4 U-fsfmCD8GFP 25do p24h003.nd2	9.36	8.93	2.8	0	0	0
116	sensFLP GMRgal4 U-fsfmCD8GFP 25do p24h003.nd2	11.61	10.25	5.46	0	0	0
117	sensFLP GMRgal4 U-fsfmCD8GFP 25do p24h003.nd2	4.62	4.24	1.83	0	0	0
118	sensFLP GMRgal4 U-fsfmCD8GFP 25do p24h003.nd2	0	0	0	0	0	0
119	sensFLP GMRgal4 U-fsfmCD8GFP 25do p24h003.nd2	0	0	0	0	0	0
120	sensFLP GMRgal4 U-fsfmCD8GFP 25do p24h003.nd2	0	0	0	0	0	0
121	sensFLP GMRgal4 U-fsfmCD8GFP 25do p24h003.nd2	0.79	0.79	0	0	0	0
122	sensFLP GMRgal4 U-fsfmCD8GFP 25do p24h003.nd2	4.64	3.77	2.7	0	0	0
123	sensFLP GMRgal4 U-fsfmCD8GFP 25do p24h003.nd2	7.82	6.4	4.51	0	0	0
124	sensFLP GMRgal4 U-fsfmCD8GFP 25do p24h003.nd2	11.4	10.5	4.46	0	0	0
125	sensFLP GMRgal4 U-fsfmCD8GFP 25do p24h003.nd2	1.97	1.97	0	0	0	0
126	sensFLP GMRgal4 U-fsfmCD8GFP 25do p24h003.nd2	1.44	1.44	0	0	0	0
127	sensFLP GMRgal4 U-fsfmCD8GFP 25do p24h003.nd2	12.61	12.49	1.75	0	0	0
128	sensFLP GMRgal4 U-fsfmCD8GFP 25do p24h003.nd2	3.04	3.04	0	0	0	0
129	sensFLP GMRgal4 U-fsfmCD8GFP 25do p24h003.nd2	8.63	8.19	2.72	0	0	0
130	sensFLP GMRgal4 U-fsfmCD8GFP 25do p24h003.nd2	6.51	6.44	0.91	0	0	0
131	sensFLP GMRgal4 U-fsfmCD8GFP 25do p24h003.nd2	8.1	6.16	5.25	0	0	0
132	sensFLP GMRgal4 U-fsfmCD8GFP 25do p24h003.nd2	2.12	1.19	1.76	0	0	0
133	sensFLP GMRgal4 U-fsfmCD8GFP 25do p24h003.nd2	0	0	0	0	0	0
134	sensFLP GMRgal4 U-fsfmCD8GFP 25do p24h003.nd2	0.59	0.59	0.002	0	0	0
135	sensFLP GMRgal4 U-fsfmCD8GFP 25do p24h003.nd2	1.43	1.29	0.61	0	0	0
136	sensFLP GMRgal4 U-fsfmCD8GFP 25do p24h003.nd2	7.6	5.37	5.38	0	0	0
137	sensFLP GMRgal4 U-fsfmCD8GFP 25do p24h003.nd2	1.87	1.74	0.7	0	0	0
138	sensFLP GMRgal4 U-fsfmCD8GFP 25do p24h003.nd2	7.71	7.59	1.32	0	0	0
139	sensFLP GMRgal4 U-fsfmCD8GFP 25do p24h003.nd2	4.39	4.2	1.25	0	0	0
140	sensFLP GMRgal4 U-fsfmCD8GFP 25do p24h003.nd2	2.42	2.09	1.21	0	0	0
141	sensFLP GMRgal4 U-fsfmCD8GFP 25do p24h003.nd2	0	0	0	0	0	0
142	sensFLP GMRgal4 U-fsfmCD8GFP 25do p24h003.nd2	2.51	2.14	1.31	0	0	0
143	sensFLP GMRgal4 U-fsfmCD8GFP 25do p24h003.nd2	2.26	2.26	0.001	0	0	0
144	sensFLP GMRgal4 U-fsfmCD8GFP 25do p24h003.nd2	1.88	1.43	1.22	0	0	0
145	sensFLP GMRgal4 U-fsfmCD8GFP 25do p24h003.nd2	22.11	22.08	1.19	0	0	0
146	sensFLP GMRgal4 U-fsfmCD8GFP 25do p24h003.nd2	8.63	8.63	0	0	0	0
147	sensFLP GMRgal4 U-fsfmCD8GFP 25do p24h003.nd2	10.07	10.05	0.59	0	0	0
148	sensFLP GMRgal4 U-fsfmCD8GFP 25do p24h003.nd2	9.2	8.92	2.22	0	0	0
149	sensFLP GMRgal4 U-fsfmCD8GFP 25do p24h003.nd2	4.8	4.62	1.31	0	0	0
150	sensFLP GMRgal4 U-fsfmCD8GFP 25do p24h003.nd2	1.57	1.44	0.63	0	0	0
151	sensFLP GMRgal4 U-fsfmCD8GFP 25do p24h003.nd2	4.18	4.02	1.17	0	0	0
Feature	Mean	St.Dev	Minimum	Maximum
Length xyz	6.28	6.16	0	30.04
Length xy	5.89	6.09	0	30.04
Height	1.51	1.8	0	8.18
Item	Source	Length xyz	Length xy	Height	ND.T	ND.Z	ND.M	Comment
1	sensFLP GMRgal4 U-fsfmCD8GFP 25do p24h005.nd2	4.81	4.74	0.83	0	0	0
2	sensFLP GMRgal4 U-fsfmCD8GFP 25do p24h005.nd2	1.23	0.9	0.84	0	0	0
3	sensFLP GMRgal4 U-fsfmCD8GFP 25do p24h005.nd2	5.25	5.25	0.01	0	0	0
4	sensFLP GMRgal4 U-fsfmCD8GFP 25do p24h005.nd2	2.01	2.01	0.002	0	0	0
5	sensFLP GMRgal4 U-fsfmCD8GFP 25do p24h005.nd2	21.83	20.47	7.6	0	0	0
6	sensFLP GMRgal4 U-fsfmCD8GFP 25do p24h005.nd2	5.78	5.78	0.02	0	0	0
7	sensFLP GMRgal4 U-fsfmCD8GFP 25do p24h005.nd2	3.57	1.39	3.29	0	0	0
8	sensFLP GMRgal4 U-fsfmCD8GFP 25do p24h005.nd2	3.4	1	3.25	0	0	0
9	sensFLP GMRgal4 U-fsfmCD8GFP 25do p24h005.nd2	1.14	0.81	0.81	0	0	0
10	sensFLP GMRgal4 U-fsfmCD8GFP 25do p24h005.nd2	13.74	13.64	1.69	0	0	0
11	sensFLP GMRgal4 U-fsfmCD8GFP 25do p24h005.nd2	2.97	1.8	2.36	0	0	0
12	sensFLP GMRgal4 U-fsfmCD8GFP 25do p24h005.nd2	4.09	1.13	3.93	0	0	0
13	sensFLP GMRgal4 U-fsfmCD8GFP 25do p24h005.nd2	5.27	4.71	2.35	0	0	0
14	sensFLP GMRgal4 U-fsfmCD8GFP 25do p24h005.nd2	11.16	9.76	5.41	0	0	0
15	sensFLP GMRgal4 U-fsfmCD8GFP 25do p24h005.nd2	4.49	4.42	0.79	0	0	0
16	sensFLP GMRgal4 U-fsfmCD8GFP 25do p24h005.nd2	10.82	10.71	1.5	0	0	0
17	sensFLP GMRgal4 U-fsfmCD8GFP 25do p24h005.nd2	1.11	0.78	0.78	0	0	0
18	sensFLP GMRgal4 U-fsfmCD8GFP 25do p24h005.nd2	0	0	0	0	0	0
19	sensFLP GMRgal4 U-fsfmCD8GFP 25do p24h005.nd2	4.95	1.72	4.65	0	0	0
20	sensFLP GMRgal4 U-fsfmCD8GFP 25do p24h005.nd2	4.45	4.13	1.65	0	0	0
21	sensFLP GMRgal4 U-fsfmCD8GFP 25do p24h005.nd2	9.32	8.7	3.32	0	0	0
22	sensFLP GMRgal4 U-fsfmCD8GFP 25do p24h005.nd2	8.81	8.69	1.46	0	0	0
23	sensFLP GMRgal4 U-fsfmCD8GFP 25do p24h005.nd2	21.05	21.02	1.16	0	0	0
24	sensFLP GMRgal4 U-fsfmCD8GFP 25do p24h005.nd2	18.76	18.75	0.7	0	0	0
25	sensFLP GMRgal4 U-fsfmCD8GFP 25do p24h005.nd2	10.86	10.77	1.37	0	0	0
26	sensFLP GMRgal4 U-fsfmCD8GFP 25do p24h005.nd2	2.82	2.82	0.004	0	0	0
27	sensFLP GMRgal4 U-fsfmCD8GFP 25do p24h005.nd2	6.87	5.86	3.58	0	0	0
28	sensFLP GMRgal4 U-fsfmCD8GFP 25do p24h005.nd2	3.45	3.45	0.004	0	0	0
29	sensFLP GMRgal4 U-fsfmCD8GFP 25do p24h005.nd2	0	0	0	0	0	0
30	sensFLP GMRgal4 U-fsfmCD8GFP 25do p24h005.nd2	0	0	0	0	0	0
31	sensFLP GMRgal4 U-fsfmCD8GFP 25do p24h005.nd2	11.73	11.59	1.86	0	0	0
32	sensFLP GMRgal4 U-fsfmCD8GFP 25do p24h005.nd2	6.72	6.72	0	0	0	0
33	sensFLP GMRgal4 U-fsfmCD8GFP 25do p24h005.nd2	0	0	0	0	0	0
34	sensFLP GMRgal4 U-fsfmCD8GFP 25do p24h005.nd2	9.51	9.51	0	0	0	0
35	sensFLP GMRgal4 U-fsfmCD8GFP 25do p24h005.nd2	16.77	16.2	4.32	0	0	0
36	sensFLP GMRgal4 U-fsfmCD8GFP 25do p24h005.nd2	3.51	2.65	2.3	0	0	0
37	sensFLP GMRgal4 U-fsfmCD8GFP 25do p24h005.nd2	7.97	7.97	0.01	0	0	0
38	sensFLP GMRgal4 U-fsfmCD8GFP 25do p24h005.nd2	4.33	2.87	3.24	0	0	0
39	sensFLP GMRgal4 U-fsfmCD8GFP 25do p24h005.nd2	2.52	2.52	0.01	0	0	0
40	sensFLP GMRgal4 U-fsfmCD8GFP 25do p24h005.nd2	2.07	2.07	0	0	0	0
41	sensFLP GMRgal4 U-fsfmCD8GFP 25do p24h005.nd2	1.78	1.78	0	0	0	0
42	sensFLP GMRgal4 U-fsfmCD8GFP 25do p24h005.nd2	5.83	5.83	0	0	0	0
43	sensFLP GMRgal4 U-fsfmCD8GFP 25do p24h005.nd2	1.71	1.52	0.76	0	0	0
44	sensFLP GMRgal4 U-fsfmCD8GFP 25do p24h005.nd2	0	0	0	0	0	0
45	sensFLP GMRgal4 U-fsfmCD8GFP 25do p24h005.nd2	16.21	16.08	2.02	0	0	0
46	sensFLP GMRgal4 U-fsfmCD8GFP 25do p24h005.nd2	2.33	2.33	0	0	0	0
47	sensFLP GMRgal4 U-fsfmCD8GFP 25do p24h005.nd2	3.96	3.87	0.84	0	0	0
48	sensFLP GMRgal4 U-fsfmCD8GFP 25do p24h005.nd2	2.26	1.47	1.72	0	0	0
49	sensFLP GMRgal4 U-fsfmCD8GFP 25do p24h005.nd2	0.64	0.64	0	0	0	0
50	sensFLP GMRgal4 U-fsfmCD8GFP 25do p24h005.nd2	1.36	1.05	0.86	0	0	0
51	sensFLP GMRgal4 U-fsfmCD8GFP 25do p24h005.nd2	3.27	1.92	2.65	0	0	0
52	sensFLP GMRgal4 U-fsfmCD8GFP 25do p24h005.nd2	0	0	0	0	0	0
53	sensFLP GMRgal4 U-fsfmCD8GFP 25do p24h005.nd2	9.61	9.44	1.79	0	0	0
54	sensFLP GMRgal4 U-fsfmCD8GFP 25do p24h005.nd2	2.7	2.54	0.9	0	0	0
55	sensFLP GMRgal4 U-fsfmCD8GFP 25do p24h005.nd2	1.51	1.51	0	0	0	0
56	sensFLP GMRgal4 U-fsfmCD8GFP 25do p24h005.nd2	1.63	1.63	0	0	0	0
57	sensFLP GMRgal4 U-fsfmCD8GFP 25do p24h005.nd2	16.62	16.62	6e-05	0	0	0
58	sensFLP GMRgal4 U-fsfmCD8GFP 25do p24h005.nd2	12.55	12.42	1.8	0	0	0
59	sensFLP GMRgal4 U-fsfmCD8GFP 25do p24h005.nd2	9.95	9.94	0.4	0	0	0
60	sensFLP GMRgal4 U-fsfmCD8GFP 25do p24h005.nd2	0	0	0	0	0	0
61	sensFLP GMRgal4 U-fsfmCD8GFP 25do p24h005.nd2	6.59	6.59	3e-05	0	0	0
62	sensFLP GMRgal4 U-fsfmCD8GFP 25do p24h005.nd2	1.9	1.86	0.37	0	0	0
63	sensFLP GMRgal4 U-fsfmCD8GFP 25do p24h005.nd2	1.02	0.69	0.75	0	0	0
64	sensFLP GMRgal4 U-fsfmCD8GFP 25do p24h005.nd2	2.27	2.24	0.37	0	0	0
65	sensFLP GMRgal4 U-fsfmCD8GFP 25do p24h005.nd2	0	0	0	0	0	0
66	sensFLP GMRgal4 U-fsfmCD8GFP 25do p24h005.nd2	0	0	0	0	0	0
67	sensFLP GMRgal4 U-fsfmCD8GFP 25do p24h005.nd2	2.47	2.33	0.8	0	0	0
68	sensFLP GMRgal4 U-fsfmCD8GFP 25do p24h005.nd2	1.66	1.66	0	0	0	0
69	sensFLP GMRgal4 U-fsfmCD8GFP 25do p24h005.nd2	11.18	10.96	2.18	0	0	0
70	sensFLP GMRgal4 U-fsfmCD8GFP 25do p24h005.nd2	2.42	1.98	1.4	0	0	0
71	sensFLP GMRgal4 U-fsfmCD8GFP 25do p24h005.nd2	5.35	2.37	4.8	0	0	0
72	sensFLP GMRgal4 U-fsfmCD8GFP 25do p24h005.nd2	5.69	4.63	3.32	0	0	0
73	sensFLP GMRgal4 U-fsfmCD8GFP 25do p24h005.nd2	10.1	8.34	5.7	0	0	0
74	sensFLP GMRgal4 U-fsfmCD8GFP 25do p24h005.nd2	5.97	5.94	0.61	0	0	0
75	sensFLP GMRgal4 U-fsfmCD8GFP 25do p24h005.nd2	0	0	0	0	0	0
76	sensFLP GMRgal4 U-fsfmCD8GFP 25do p24h005.nd2	2.68	2.6	0.64	0	0	0
77	sensFLP GMRgal4 U-fsfmCD8GFP 25do p24h005.nd2	0	0	0	0	0	0
78	sensFLP GMRgal4 U-fsfmCD8GFP 25do p24h005.nd2	1.25	1.05	0.69	0	0	0
79	sensFLP GMRgal4 U-fsfmCD8GFP 25do p24h005.nd2	2.15	2.15	0	0	0	0
80	sensFLP GMRgal4 U-fsfmCD8GFP 25do p24h005.nd2	11.79	11.19	3.71	0	0	0
81	sensFLP GMRgal4 U-fsfmCD8GFP 25do p24h005.nd2	0.38	0.13	0.36	0	0	0
82	sensFLP GMRgal4 U-fsfmCD8GFP 25do p24h005.nd2	5.73	5.68	0.76	0	0	0
83	sensFLP GMRgal4 U-fsfmCD8GFP 25do p24h005.nd2	19.11	19.11	0	0	0	0
84	sensFLP GMRgal4 U-fsfmCD8GFP 25do p24h005.nd2	0.4	0.4	0	0	0	0
85	sensFLP GMRgal4 U-fsfmCD8GFP 25do p24h005.nd2	0.97	0.58	0.77	0	0	0
86	sensFLP GMRgal4 U-fsfmCD8GFP 25do p24h005.nd2	0	0	0	0	0	0
87	sensFLP GMRgal4 U-fsfmCD8GFP 25do p24h005.nd2	0.39	0.39	0.001	0	0	0
88	sensFLP GMRgal4 U-fsfmCD8GFP 25do p24h005.nd2	2.04	2.04	0.02	0	0	0
89	sensFLP GMRgal4 U-fsfmCD8GFP 25do p24h005.nd2	6.84	6.33	2.59	0	0	0
90	sensFLP GMRgal4 U-fsfmCD8GFP 25do p24h005.nd2	2.31	2.31	0	0	0	0
91	sensFLP GMRgal4 U-fsfmCD8GFP 25do p24h005.nd2	0.9	0.31	0.84	0	0	0
92	sensFLP GMRgal4 U-fsfmCD8GFP 25do p24h005.nd2	4.47	1.28	4.29	0	0	0
93	sensFLP GMRgal4 U-fsfmCD8GFP 25do p24h005.nd2	8.77	8.74	0.76	0	0	0
94	sensFLP GMRgal4 U-fsfmCD8GFP 25do p24h005.nd2	10.13	8.21	5.94	0	0	0
95	sensFLP GMRgal4 U-fsfmCD8GFP 25do p24h005.nd2	5.84	5.77	0.9	0	0	0
96	sensFLP GMRgal4 U-fsfmCD8GFP 25do p24h005.nd2	4.48	4.11	1.78	0	0	0
97	sensFLP GMRgal4 U-fsfmCD8GFP 25do p24h005.nd2	0	0	0	0	0	0
98	sensFLP GMRgal4 U-fsfmCD8GFP 25do p24h005.nd2	0.29	0.29	0.002	0	0	0
99	sensFLP GMRgal4 U-fsfmCD8GFP 25do p24h005.nd2	2.89	1.2	2.63	0	0	0
100	sensFLP GMRgal4 U-fsfmCD8GFP 25do p24h005.nd2	4.34	4.34	0.03	0	0	0
101	sensFLP GMRgal4 U-fsfmCD8GFP 25do p24h005.nd2	9.11	8.41	3.52	0	0	0
102	sensFLP GMRgal4 U-fsfmCD8GFP 25do p24h005.nd2	5.35	5.05	1.76	0	0	0
103	sensFLP GMRgal4 U-fsfmCD8GFP 25do p24h005.nd2	2.1	1.91	0.87	0	0	0
104	sensFLP GMRgal4 U-fsfmCD8GFP 25do p24h005.nd2	0.79	0.79	0.0007	0	0	0
105	sensFLP GMRgal4 U-fsfmCD8GFP 25do p24h005.nd2	0.13	0.13	0.001	0	0	0
106	sensFLP GMRgal4 U-fsfmCD8GFP 25do p24h005.nd2	6.02	4.61	3.87	0	0	0
107	sensFLP GMRgal4 U-fsfmCD8GFP 25do p24h005.nd2	3.18	3.06	0.87	0	0	0
108	sensFLP GMRgal4 U-fsfmCD8GFP 25do p24h005.nd2	0	0	0	0	0	0
109	sensFLP GMRgal4 U-fsfmCD8GFP 25do p24h005.nd2	2.43	2.43	0.01	0	0	0
110	sensFLP GMRgal4 U-fsfmCD8GFP 25do p24h005.nd2	5.83	3.96	4.27	0	0	0
111	sensFLP GMRgal4 U-fsfmCD8GFP 25do p24h005.nd2	2.32	2.16	0.85	0	0	0
112	sensFLP GMRgal4 U-fsfmCD8GFP 25do p24h005.nd2	0	0	0	0	0	0
113	sensFLP GMRgal4 U-fsfmCD8GFP 25do p24h005.nd2	5.94	5.87	0.9	0	0	0
114	sensFLP GMRgal4 U-fsfmCD8GFP 25do p24h005.nd2	4.09	4.09	0	0	0	0
115	sensFLP GMRgal4 U-fsfmCD8GFP 25do p24h005.nd2	6.9	6.9	0	0	0	0
116	sensFLP GMRgal4 U-fsfmCD8GFP 25do p24h005.nd2	0	0	0	0	0	0
117	sensFLP GMRgal4 U-fsfmCD8GFP 25do p24h005.nd2	0	0	0	0	0	0
118	sensFLP GMRgal4 U-fsfmCD8GFP 25do p24h005.nd2	6.61	6.55	0.9	0	0	0
119	sensFLP GMRgal4 U-fsfmCD8GFP 25do p24h005.nd2	3.16	3.16	0	0	0	0
120	sensFLP GMRgal4 U-fsfmCD8GFP 25do p24h005.nd2	5.74	5.74	0	0	0	0
121	sensFLP GMRgal4 U-fsfmCD8GFP 25do p24h005.nd2	0	0	0	0	0	0
122	sensFLP GMRgal4 U-fsfmCD8GFP 25do p24h005.nd2	0.71	0.71	5e-05	0	0	0
123	sensFLP GMRgal4 U-fsfmCD8GFP 25do p24h005.nd2	3.47	3.47	0	0	0	0
124	sensFLP GMRgal4 U-fsfmCD8GFP 25do p24h005.nd2	2.48	1.87	1.63	0	0	0
125	sensFLP GMRgal4 U-fsfmCD8GFP 25do p24h005.nd2	1.07	0.69	0.82	0	0	0
126	sensFLP GMRgal4 U-fsfmCD8GFP 25do p24h005.nd2	4.76	3.46	3.28	0	0	0
127	sensFLP GMRgal4 U-fsfmCD8GFP 25do p24h005.nd2	1.97	1.13	1.61	0	0	0
128	sensFLP GMRgal4 U-fsfmCD8GFP 25do p24h005.nd2	4.57	3.87	2.44	0	0	0
129	sensFLP GMRgal4 U-fsfmCD8GFP 25do p24h005.nd2	9.11	9.08	0.83	0	0	0
130	sensFLP GMRgal4 U-fsfmCD8GFP 25do p24h005.nd2	0	0	0	0	0	0
131	sensFLP GMRgal4 U-fsfmCD8GFP 25do p24h005.nd2	6.37	5.51	3.21	0	0	0
132	sensFLP GMRgal4 U-fsfmCD8GFP 25do p24h005.nd2	14.75	14.69	1.3	0	0	0
133	sensFLP GMRgal4 U-fsfmCD8GFP 25do p24h005.nd2	21.92	21.9	0.99	0	0	0
134	sensFLP GMRgal4 U-fsfmCD8GFP 25do p24h005.nd2	4.98	4.91	0.84	0	0	0
135	sensFLP GMRgal4 U-fsfmCD8GFP 25do p24h005.nd2	4.4	4.4	0.01	0	0	0
136	sensFLP GMRgal4 U-fsfmCD8GFP 25do p24h005.nd2	8.91	8.87	0.81	0	0	0
137	sensFLP GMRgal4 U-fsfmCD8GFP 25do p24h005.nd2	4.68	4.44	1.49	0	0	0
138	sensFLP GMRgal4 U-fsfmCD8GFP 25do p24h005.nd2	0	0	0	0	0	0
139	sensFLP GMRgal4 U-fsfmCD8GFP 25do p24h005.nd2	7.97	7.97	9e-05	0	0	0
140	sensFLP GMRgal4 U-fsfmCD8GFP 25do p24h005.nd2	12.35	12.22	1.74	0	0	0
141	sensFLP GMRgal4 U-fsfmCD8GFP 25do p24h005.nd2	0.9	0.76	0.5	0	0	0
142	sensFLP GMRgal4 U-fsfmCD8GFP 25do p24h005.nd2	0	0	0	0	0	0
143	sensFLP GMRgal4 U-fsfmCD8GFP 25do p24h005.nd2	7.99	7.97	0.66	0	0	0
144	sensFLP GMRgal4 U-fsfmCD8GFP 25do p24h005.nd2	5.25	5.2	0.74	0	0	0
Feature	Mean	St.Dev	Minimum	Maximum
Length xyz	4.9	4.92	0	21.92
Length xy	4.54	4.9	0	21.9
Height	1.16	1.51	0	7.6
