# Supplementary material for: Glial insulin regulates cooperative or antagonistic Golden goal/Flamingo interactions during photoreceptor axon guidance
Source: eLife. 2021 Mar 5;10:e66718. doi: 10.7554/eLife.66718 (PMC7987344; doi:10.7554/eLife.66718)
Supplement: Figure 5—source data 3. [file elife-66718-fig5-data3.xlsx]

## Sheet: Sheet1
	total	abnormal
gogo-	121	63
gogo-	142	79			WT (n=3, 389 axons)	gogo- (n=4, 469)	gogo- +GogoWT (n=4, 575)	gogo- +GogoFFD (n=4, 535)
gogo-	100	57		total	389	469	575	535
gogo-	106	61		bundling	9	260	24	173
total	469	260		normal	380	209	551	362
				Ratio	0.0231362	0.554371	0.0417391	0.323364
	total	abnormal		χ2			342.784	54.3732
gogoWT	145	6		p			1.57974e-76	1.6581e-13
gogoWT	152	4
gogoWT	140	1
gogoWT	138	13
total	575	24
	total	abnormal
gogoFFD	143	47
gogoFFD	129	42
gogoFFD	123	37
gogoFFD	140	47
total	535	173
	total	abnormal
Control	133	6		32	2	31	2	34	1	30	1
Control	131	2		34	0	34	0	31	0	30	2
Control	125	1		29	0	31	0	30	0	34	1
total	389	9
