# Supplementary material for: Glial insulin regulates cooperative or antagonistic Golden goal/Flamingo interactions during photoreceptor axon guidance
Source: eLife. 2021 Mar 5;10:e66718. doi: 10.7554/eLife.66718 (PMC7987344; doi:10.7554/eLife.66718)
Supplement: Figure 6—source data 1. [file elife-66718-fig6-data1.xlsx]

## Sheet: Sheet1
WT	Normal	Abnormal		gogo-	Normal	Abnormal		DInR-	Normal	Abnormal
1	56	2		1	24	28		1	12	18
	40	2			30	20			26	12
2	48	0		2	16	28		2	28	14
	50	0			22	24			31	12
3	48	0		3	20	20		3	22	17
	46	0			20	26			24	18
4	42	2		4	26	24		4	29	19
	40	2			24	28			20	16
5	46	1		5	26	22		5	21	24
	40	0			20	22			21	20
計	456	9			228	242			234	170
		0.0193548				0.514894				0.420792
	Control (n=5, 465 axons)	gogo LOF (n=5, 470)	dinr LOF (n=5, 404)
	0.0193548	0.514894	0.420792
