# Supplementary material for: Glial insulin regulates cooperative or antagonistic Golden goal/Flamingo interactions during photoreceptor axon guidance
Source: eLife. 2021 Mar 5;10:e66718. doi: 10.7554/eLife.66718 (PMC7987344; doi:10.7554/eLife.66718)
Supplement: Figure 6—source data 2. [file elife-66718-fig6-data2.xlsx]

## Sheet: Sheet1
	Control (n=3, 298 axons)	loco-Gal4 UAS-shi[ts1] (n=3, 284)	R85G01-Gal4 UAS-shi[ts1] (n=3, 299)	R25A01-Gal4 UAS-shi[ts1] (n=3, 349)	Mz97-Gal4 UAS-shi[ts1] (n=3, 290)	dilp6-Gal4 UAS-shi[ts1] (n=3, 275)	dilp2-Gal4 UAS-shi[ts1] (n=3, 365)	loco-Gal4 HobRNAi (n=4, 358)
normal	292	19	186	319	247	153	360	143
bundling	6	265	113	30	43	122	5	215
total	298	284	299	349	290	275	365	358
	0.0201342	0.933099	0.377926	0.0859599	0.148276	0.443636	0.0136986	0.601
X2		487.12	119.715	13.2554	31.5927	147.858	0.416447
p		6.03349e-108	7.30339e-28	0.000271797	1.90139e-08	5.09534e-34	0.518715

## Sheet: HobRNAi
	normal	bundling								4
1	17	16
	16	17
	17	11
total	50	44
2	15	15
	13	15
	14	16
total	42	46
3	17	13
	10	18
	9	20
total	36	51
4	3	24
	9	21
	3	29
total	15	74
	143	215

## Sheet: control
Item	Source	Numbers	ND.T	ND.Z	ND.M	Comment
1	U-shits noGal4 p24h.nd2	35	0	0	0	1
2	U-shits noGal4 p24h.nd2	2	0	0	0	1
3	U-shits noGal4 p24h.nd2	28	0	0	0	1
4	U-shits noGal4 p24h.nd2	1	0	0	0	1
5	U-shits noGal4 p24h.nd2	33	0	0	0	1		normal	96
6	U-shits noGal4 p24h.nd2	0	0	0	0	1		bundling	3
Feature	Mean	St.Dev	Minimum	Maximum
Numbers	16.5	15.6498	0	35
Item	Source	Numbers	ND.T	ND.Z	ND.M	Comment
1	U-shits noGal4 p24h.nd2	34	0	0	0	1
2	U-shits noGal4 p24h.nd2	0	0	0	0	1
3	U-shits noGal4 p24h.nd2	35	0	0	0	1
4	U-shits noGal4 p24h.nd2	0	0	0	0	1
5	U-shits noGal4 p24h.nd2	33	0	0	0	1		normal	102
6	U-shits noGal4 p24h.nd2	2	0	0	0	1		bundling	2
Feature	Mean	St.Dev	Minimum	Maximum
Numbers	17.3333	16.69	0	35
Item	Source	Numbers	ND.T	ND.Z	ND.M	Comment
1	U-shits noGal4 p24h.nd2	29	N/A	66	5	1				normal	292
2	U-shits noGal4 p24h.nd2	1	N/A	66	5	1				bundling	6
3	U-shits noGal4 p24h.nd2	34	0	0	0	1				total	298	0.0201342281879195
4	U-shits noGal4 p24h.nd2	0	0	0	0	1
5	U-shits noGal4 p24h.nd2	31	0	0	0	1		normal	94
6	U-shits noGal4 p24h.nd2	0	0	0	0	1		bundling	1
Feature	Mean	St.Dev	Minimum	Maximum
Numbers	15.8333	15.5715	0	34

## Sheet: loco
Item	Source	Numbers	ND.T	ND.Z	ND.M	Comment
1	loco 85G01 25A01 dilp6 Gal4 p24h.nd2	2	0	0	0	1
2	loco 85G01 25A01 dilp6 Gal4 p24h.nd2	20	0	0	0	1
3	loco 85G01 25A01 dilp6 Gal4 p24h.nd2	3	0	0	0	1
4	loco 85G01 25A01 dilp6 Gal4 p24h.nd2	21	0	0	0	1
5	loco 85G01 25A01 dilp6 Gal4 p24h.nd2	0	0	0	0	1
6	loco 85G01 25A01 dilp6 Gal4 p24h.nd2	24	0	0	0	1
7	loco 85G01 25A01 dilp6 Gal4 p24h.nd2	4	0	0	0	1		9
8	loco 85G01 25A01 dilp6 Gal4 p24h.nd2	21	0	0	0	1		86
Feature	Mean	St.Dev	Minimum	Maximum
Numbers	11.875	9.7396	0	24
Item	Source	Numbers	ND.T	ND.Z	ND.M	Comment
1	loco 85G01 25A01 dilp6 Gal4 p24h.nd2	2	0	0	0	1
2	loco 85G01 25A01 dilp6 Gal4 p24h.nd2	29	0	0	0	1
3	loco 85G01 25A01 dilp6 Gal4 p24h.nd2	2	0	0	0	1
4	loco 85G01 25A01 dilp6 Gal4 p24h.nd2	20	0	0	0	1
5	loco 85G01 25A01 dilp6 Gal4 p24h.nd2	1	0	0	0	1
6	loco 85G01 25A01 dilp6 Gal4 p24h.nd2	18	0	0	0	1
7	loco 85G01 25A01 dilp6 Gal4 p24h.nd2	0	0	0	0	1		5
8	loco 85G01 25A01 dilp6 Gal4 p24h.nd2	18	0	0	0	1		85
Feature	Mean	St.Dev	Minimum	Maximum
Numbers	11.25	10.5208	0	29
Item	Source	Numbers	ND.T	ND.Z	ND.M	Comment
1	loco 85G01 25A01 dilp6 Gal4 p24h.nd2	4	0	0	0	1				19
2	loco 85G01 25A01 dilp6 Gal4 p24h.nd2	22	0	0	0	1				265
3	loco 85G01 25A01 dilp6 Gal4 p24h.nd2	0	0	0	0	1				284	0.933098591549296
4	loco 85G01 25A01 dilp6 Gal4 p24h.nd2	23	0	0	0	1
5	loco 85G01 25A01 dilp6 Gal4 p24h.nd2	1	0	0	0	1
6	loco 85G01 25A01 dilp6 Gal4 p24h.nd2	25	0	0	0	1
7	loco 85G01 25A01 dilp6 Gal4 p24h.nd2	0	0	0	0	1		5
8	loco 85G01 25A01 dilp6 Gal4 p24h.nd2	24	0	0	0	1		94
Feature	Mean	St.Dev	Minimum	Maximum
Numbers	12.375	11.2131	0	25

## Sheet: 85G01
Item	Source	Numbers	ND.T	ND.Z	ND.M	Comment
1	54C07 85G01 Gal4 p24h.nd2	21	N/A	23	3	1
2	54C07 85G01 Gal4 p24h.nd2	9	0	0	0	1
3	54C07 85G01 Gal4 p24h.nd2	18	0	0	0	1
4	54C07 85G01 Gal4 p24h.nd2	7	0	0	0	1
5	54C07 85G01 Gal4 p24h.nd2	18	0	0	0	1
6	54C07 85G01 Gal4 p24h.nd2	6	0	0	0	1
7	54C07 85G01 Gal4 p24h.nd2	17	0	0	0	1		74
8	54C07 85G01 Gal4 p24h.nd2	11	0	0	0	1		33
Feature	Mean	St.Dev	Minimum	Maximum
Numbers	13.375	5.4069	6	21
Item	Source	Numbers	ND.T	ND.Z	ND.M	Comment
1	54C07 85G01 Gal4 p24h.nd2	5	0	0	0	1
2	54C07 85G01 Gal4 p24h.nd2	14	0	0	0	1
3	54C07 85G01 Gal4 p24h.nd2	11	0	0	0	1
4	54C07 85G01 Gal4 p24h.nd2	11	0	0	0	1
5	54C07 85G01 Gal4 p24h.nd2	15	0	0	0	1
6	54C07 85G01 Gal4 p24h.nd2	6	0	0	0	1
7	54C07 85G01 Gal4 p24h.nd2	17	0	0	0	1		48
8	54C07 85G01 Gal4 p24h.nd2	8	0	0	0	1		39
Feature	Mean	St.Dev	Minimum	Maximum
Numbers	10.875	4.0447	5	17
Item	Source	Numbers	ND.T	ND.Z	ND.M	Comment
1	loco 85G01 25A01 dilp6 Gal4 p24h.nd2	19	N/A	33	14	1				186
2	loco 85G01 25A01 dilp6 Gal4 p24h.nd2	14	0	0	0	1				113
3	loco 85G01 25A01 dilp6 Gal4 p24h.nd2	27	0	0	0	1				299	0.377926421404682
4	loco 85G01 25A01 dilp6 Gal4 p24h.nd2	5	0	0	0	1
5	loco 85G01 25A01 dilp6 Gal4 p24h.nd2	12	0	0	0	1
6	loco 85G01 25A01 dilp6 Gal4 p24h.nd2	10	0	0	0	1
7	loco 85G01 25A01 dilp6 Gal4 p24h.nd2	6	0	0	0	1		64
8	loco 85G01 25A01 dilp6 Gal4 p24h.nd2	12	0	0	0	1		41
Feature	Mean	St.Dev	Minimum	Maximum
Numbers	13.125	6.679	5	27

## Sheet: 25A01
Item	Source	Numbers	ND.T	ND.Z	ND.M	Comment
1	54H02 25A01 dilp6 Gal4 p24h.nd2	25	N/A	66	7	1
2	54H02 25A01 dilp6 Gal4 p24h.nd2	4	N/A	66	7	1
3	54H02 25A01 dilp6 Gal4 p24h.nd2	26	0	0	0	1
4	54H02 25A01 dilp6 Gal4 p24h.nd2	3	0	0	0	1
5	54H02 25A01 dilp6 Gal4 p24h.nd2	30	0	0	0	1
6	54H02 25A01 dilp6 Gal4 p24h.nd2	2	0	0	0	1
7	54H02 25A01 dilp6 Gal4 p24h.nd2	25	0	0	0	1		106
8	54H02 25A01 dilp6 Gal4 p24h.nd2	4	0	0	0	1		13
Feature	Mean	St.Dev	Minimum	Maximum
Numbers	14.875	11.7307	2	30
Item	Source	Numbers	ND.T	ND.Z	ND.M	Comment
1	54H02 25A01 dilp6 Gal4 p24h.nd2	22	0	0	0	1
2	54H02 25A01 dilp6 Gal4 p24h.nd2	3	0	0	0	1
3	54H02 25A01 dilp6 Gal4 p24h.nd2	26	0	0	0	1
4	54H02 25A01 dilp6 Gal4 p24h.nd2	3	0	0	0	1
5	54H02 25A01 dilp6 Gal4 p24h.nd2	26	0	0	0	1
6	54H02 25A01 dilp6 Gal4 p24h.nd2	4	0	0	0	1
7	54H02 25A01 dilp6 Gal4 p24h.nd2	27	0	0	0	1		101
8	54H02 25A01 dilp6 Gal4 p24h.nd2	0	0	0	0	1		10
Feature	Mean	St.Dev	Minimum	Maximum
Numbers	13.875	11.5048	0	27
Item	Source	Numbers	ND.T	ND.Z	ND.M	Comment
1	54H02 25A01 dilp6 Gal4 p24h.nd2	28	N/A	9	9	1				319
2	54H02 25A01 dilp6 Gal4 p24h.nd2	2	N/A	9	9	1				30
3	54H02 25A01 dilp6 Gal4 p24h.nd2	30	0	0	0	1				349	0.0859598853868195
4	54H02 25A01 dilp6 Gal4 p24h.nd2	0	0	0	0	1
5	54H02 25A01 dilp6 Gal4 p24h.nd2	25	0	0	0	1
6	54H02 25A01 dilp6 Gal4 p24h.nd2	2	0	0	0	1
7	54H02 25A01 dilp6 Gal4 p24h.nd2	29	0	0	0	1		112
8	54H02 25A01 dilp6 Gal4 p24h.nd2	3	0	0	0	1		7
Feature	Mean	St.Dev	Minimum	Maximum
Numbers	14.875	13.214	0	30

## Sheet: Mz97
Item	Source	Numbers	ND.T	ND.Z	ND.M	Comment
1	Mz97.nd2	25	0	0	0	1
2	Mz97.nd2	3	0	0	0	1
3	Mz97.nd2	22	0	0	0	1
4	Mz97.nd2	0	0	0	0	1
5	Mz97.nd2	20	0	0	0	1
6	Mz97.nd2	2	0	0	0	1
7	Mz97.nd2	19	0	0	0	1		86
8	Mz97.nd2	0	0	0	0	1		5
Feature	Mean	St.Dev	Minimum	Maximum
Numbers	11.375	10.2949	0	25
Item	Source	Numbers	ND.T	ND.Z	ND.M	Comment
1	Mz97.nd2	25	0	0	0	1
2	Mz97.nd2	1	0	0	0	1
3	Mz97.nd2	23	0	0	0	1
4	Mz97.nd2	2	0	0	0	1
5	Mz97.nd2	25	0	0	0	1
6	Mz97.nd2	1	0	0	0	1
7	Mz97.nd2	25	0	0	0	1		98
8	Mz97.nd2	1	0	0	0	1		5
Feature	Mean	St.Dev	Minimum	Maximum
Numbers	12.875	11.6451	1	25
Item	Source	Numbers	ND.T	ND.Z	ND.M	Comment
1	Mz97 U-stinger.nd2	12	0	0	0	1				247
2	Mz97 U-stinger.nd2	10	0	0	0	1				43
3	Mz97 U-stinger.nd2	15	0	0	0	1				290	0.148275862068966
4	Mz97 U-stinger.nd2	7	0	0	0	1
5	Mz97 U-stinger.nd2	18	0	0	0	1
6	Mz97 U-stinger.nd2	9	0	0	0	1
7	Mz97 U-stinger.nd2	18	0	0	0	1		63
8	Mz97 U-stinger.nd2	7	0	0	0	1		33
Feature	Mean	St.Dev	Minimum	Maximum
Numbers	12	4.2426	7	18

## Sheet: dilp6
Item	Source	Numbers	ND.T	ND.Z	ND.M	Comment
1	loco 85G01 25A01 dilp6 Gal4 p24h.nd2	21	0	0	0	1
2	loco 85G01 25A01 dilp6 Gal4 p24h.nd2	9	0	0	0	1
3	loco 85G01 25A01 dilp6 Gal4 p24h.nd2	10	0	0	0	1
4	loco 85G01 25A01 dilp6 Gal4 p24h.nd2	10	0	0	0	1
5	loco 85G01 25A01 dilp6 Gal4 p24h.nd2	3	0	0	0	1
6	loco 85G01 25A01 dilp6 Gal4 p24h.nd2	16	0	0	0	1
7	loco 85G01 25A01 dilp6 Gal4 p24h.nd2	11	0	0	0	1		45
8	loco 85G01 25A01 dilp6 Gal4 p24h.nd2	7	0	0	0	1		42
Feature	Mean	St.Dev	Minimum	Maximum
Numbers	10.875	5.1341	3	21
Item	Source	Numbers	ND.T	ND.Z	ND.M	Comment
1	loco 85G01 25A01 dilp6 Gal4 p24h.nd2	13	0	0	0	1
2	loco 85G01 25A01 dilp6 Gal4 p24h.nd2	9	0	0	0	1
3	loco 85G01 25A01 dilp6 Gal4 p24h.nd2	25	0	0	0	1
4	loco 85G01 25A01 dilp6 Gal4 p24h.nd2	6	0	0	0	1
5	loco 85G01 25A01 dilp6 Gal4 p24h.nd2	18	0	0	0	1
6	loco 85G01 25A01 dilp6 Gal4 p24h.nd2	8	0	0	0	1
7	loco 85G01 25A01 dilp6 Gal4 p24h.nd2	20	0	0	0	1		76
8	loco 85G01 25A01 dilp6 Gal4 p24h.nd2	7	0	0	0	1		30
Feature	Mean	St.Dev	Minimum	Maximum
Numbers	13.25	6.5527	6	25
Item	Source	Numbers	ND.T	ND.Z	ND.M	Comment
1	54H02 25A01 dilp6 Gal4 p24h.nd2	6	0	0	0	1			153
2	54H02 25A01 dilp6 Gal4 p24h.nd2	18	0	0	0	1			122
3	54H02 25A01 dilp6 Gal4 p24h.nd2	8	0	0	0	1			275	0.443636363636364
4	54H02 25A01 dilp6 Gal4 p24h.nd2	12	0	0	0	1
5	54H02 25A01 dilp6 Gal4 p24h.nd2	11	0	0	0	1
6	54H02 25A01 dilp6 Gal4 p24h.nd2	10	0	0	0	1
7	54H02 25A01 dilp6 Gal4 p24h.nd2	7	0	0	0	1		32
8	54H02 25A01 dilp6 Gal4 p24h.nd2	10	0	0	0	1		50
Feature	Mean	St.Dev	Minimum	Maximum
Numbers	10.25	3.4911	6	18

## Sheet: dilp2
Item	Source	Numbers	ND.T	ND.Z	ND.M	Comment
1	dulp2 85G01.nd2	33	0	0	0	1
2	dulp2 85G01.nd2	0	0	0	0	1
3	dulp2 85G01.nd2	32	0	0	0	1
4	dulp2 85G01.nd2	0	0	0	0	1
5	dulp2 85G01.nd2	28	0	0	0	1
6	dulp2 85G01.nd2	0	0	0	0	1
7	dulp2 85G01.nd2	27	0	0	0	1		120
8	dulp2 85G01.nd2	2	0	0	0	1		2
Feature	Mean	St.Dev	Minimum	Maximum
Numbers	15.25	14.8724	0	33
Item	Source	Numbers	ND.T	ND.Z	ND.M	Comment
1	dulp2 85G01.nd2	28	0	0	0	1
2	dulp2 85G01.nd2	1	0	0	0	1
3	dulp2 85G01.nd2	29	0	0	0	1
4	dulp2 85G01.nd2	1	0	0	0	1
5	dulp2 85G01.nd2	28	0	0	0	1
6	dulp2 85G01.nd2	0	0	0	0	1
7	dulp2 85G01.nd2	29	0	0	0	1		114
8	dulp2 85G01.nd2	0	0	0	0	1		2
Feature	Mean	St.Dev	Minimum	Maximum
Numbers	14.5	14.0089	0	29
Item	Source	Numbers	ND.T	ND.Z	ND.M	Comment
1	dulp2 85G01.nd2	32	0	0	0	1				360
2	dulp2 85G01.nd2	0	0	0	0	1				5
3	dulp2 85G01.nd2	32	0	0	0	1				365	0.0136986301369863
4	dulp2 85G01.nd2	1	0	0	0	1
5	dulp2 85G01.nd2	32	0	0	0	1
6	dulp2 85G01.nd2	0	0	0	0	1
7	dulp2 85G01.nd2	30	0	0	0	1		126
8	dulp2 85G01.nd2	0	0	0	0	1		1
Feature	Mean	St.Dev	Minimum	Maximum
Numbers	15.875	15.64	0	32
