# Supplementary material for: Glial insulin regulates cooperative or antagonistic Golden goal/Flamingo interactions during photoreceptor axon guidance
Source: eLife. 2021 Mar 5;10:e66718. doi: 10.7554/eLife.66718 (PMC7987344; doi:10.7554/eLife.66718)
Supplement: Figure 6—source data 3. [file elife-66718-fig6-data3.xlsx]

## Sheet: Sheet1
GFG4RI				Z			GFRI			Z			GFG4				Z		GF
F001	13	1.73333		75			1	0.136986		73			1	2	0.416667		48		1	0	0	73			control
F002	5	1		50			1	0.136986		73			2	0	0		48		2	2	0.273973	73			1	0		70
F003	5	0.684932		73			4	0.8		50	1-50		3	2	0.416667		48		3	0	0	46	27-73		2	0		70
F004_1	13	2.6		50			3	0.857143		35	15-50		4	3	0.625		48		4	0	0	73				0	0	140
F004_2	6	1.2		50			1	0.133333		75			5	0	0		48		5	1	0.136986	73
F004_3	9	1.8		50			2	0.266667		75			6	0	0		48		6	3	0.410959	73
F004_4	5	1		50			2	0.266667		75				7	0.243056		288		7	1	0.136986	73
F004_5	5	1		50			14	0.307018		456					0.243056				8	0	0	73
F005_1	6	0.9375		64	11-75			0.371112												7	0.125673	557
F005_2	7	1.16667		60	15-75																0.119863
F005_3	5	0.833333		60	15-76
F005_4	6	2		30	45-75
	85	1.28399		662
		1.32965
				0.000216575

## Sheet: Sheet2
	GFG4RI	GFRI	GFG4	GF	control
	1.73333	0.136986	0.416667	0	0
	1	0.136986	0	0.273973	0
	0.684932	0.8	0.416667	0
	2.6	0.857143	0.625	0
	1.2	0.133333	0	0.136986
	1.8	0.266667	0	0.410959
	1	0.266667		0.136986
	1			0
	0.9375
	1.16667
	0.833333
	2
	GFG4RI	GFRI	GFG4	GF	control
average	1.32965	0.371112	0.243056	0.119863	0
stdev	0.550189	0.294753	0.252782	0.144283	0
n	12	7	6	8	2
ster	0.158826	0.111406	0.103198	0.0510119	0
P		0.000216575	5.75158e-05
		0.0919087	0.357684	0.0639241
