# Supplementary material for: Glial insulin regulates cooperative or antagonistic Golden goal/Flamingo interactions during photoreceptor axon guidance
Source: eLife. 2021 Mar 5;10:e66718. doi: 10.7554/eLife.66718 (PMC7987344; doi:10.7554/eLife.66718)
Supplement: Figure 7—figure supplement 1—source data 1. [file elife-66718-fig7-figsupp1-data1.xlsx]

## Sheet: Rho1 Gogo
Item	Source	Numbers	ND.T	ND.Z	ND.M	Comment
1	25do adult.nd2	28	0	0	0	1
2	25do adult.nd2	10	0	0	0	1
3	25do adult.nd2	33	0	0	0	1
4	25do adult.nd2	15	0	0	0	1
5	25do adult.nd2	27	0	0	0	1
6	25do adult.nd2	15	0	0	0	1
7	25do adult.nd2	30	0	0	0	1							WT (n=4, 250 axons)	+Gogo (n=4, 229 axons)	+Rho1 (n=4, 253 axons)	+Gogo & Rho1 (n=4, 170 axons)	+Gogo & Fmi (n=4, 254 axons)
8	25do adult.nd2	12	0	0	0	1							0	0.0174672	0.0592885	0.305882	0.409449
Feature	Mean	St.Dev	Minimum	Maximum					118				250	229	253	140	254
Numbers	21.25	8.5403	10	33					52	0.305882352941176
									170

## Sheet: Gogo
Item	Source	Numbers	ND.T	ND.Z	ND.M	Comment
1	25do adult.nd2	32	0	0	0	1
2	25do adult.nd2	0	0	0	0	1
3	25do adult.nd2	29	0	0	0	1
4	25do adult.nd2	1	0	0	0	1
Feature	Mean	St.Dev	Minimum	Maximum
Numbers	15.5	15.0416	0	32
Item	Source	Numbers	ND.T	ND.Z	ND.M	Comment
1	25do adult.nd2	22	0	0	0	1
2	25do adult.nd2	1	0	0	0	1
3	25do adult.nd2	31	0	0	0	1
4	25do adult.nd2	0	0	0	0	1
5	25do adult.nd2	28	0	0	0	1
6	25do adult.nd2	1	0	0	0	1
7	25do adult.nd2	28	0	0	0	1
8	25do adult.nd2	0	0	0	0	1
Feature	Mean	St.Dev	Minimum	Maximum
Numbers	13.875	13.5779	0	31
Item	Source	Numbers	ND.T	ND.Z	ND.M	Comment
1	25do adult001.nd2	28	0	0	0	1
2	25do adult001.nd2	0	0	0	0	1
3	25do adult001.nd2	27	0	0	0	1
4	25do adult001.nd2	1	0	0	0	1
Feature	Mean	St.Dev	Minimum	Maximum
Numbers	14	13.5093	0	28

## Sheet: Rho1
Item	Source	Numbers	ND.T	ND.Z	ND.M	Comment
1	25do adult GD236.nd2	17	0	0	0	1
2	25do adult GD236.nd2	0	0	0	0	1
3	25do adult GD236.nd2	17	0	0	0	1
4	25do adult GD236.nd2	1	0	0	0	1
5	25do adult GD236.nd2	14	0	0	0	1
6	25do adult GD236.nd2	0	0	0	0	1
7	25do adult GD236.nd2	16	0	0	0	1	64
8	25do adult GD236.nd2	1	0	0	0	1	2
Feature	Mean	St.Dev	Minimum	Maximum
Numbers	8.25	7.8062	0	17
Item	Source	Numbers	ND.T	ND.Z	ND.M	Comment
1	25do adult GD236.nd2	17	0	0	0	1
2	25do adult GD236.nd2	1	0	0	0	1
3	25do adult GD236.nd2	11	0	0	0	1
4	25do adult GD236.nd2	2	0	0	0	1
5	25do adult GD236.nd2	12	0	0	0	1
6	25do adult GD236.nd2	1	0	0	0	1
7	25do adult GD236.nd2	12	0	0	0	1	52
8	25do adult GD236.nd2	1	0	0	0	1	5
Feature	Mean	St.Dev	Minimum	Maximum
Numbers	7.375	5.8936	1	17
Item	Source	Numbers	ND.T	ND.Z	ND.M	Comment
1	25do adult GD236.nd2	58	0	0	0	1
2	25do adult GD236.nd2	3	0	0	0	1
Feature	Mean	St.Dev	Minimum	Maximum
Numbers	30.5	27.5	3	58
Item	Source	Numbers	ND.T	ND.Z	ND.M	Comment
1	25do adult GD236.nd2	58	0	0	0	1
2	25do adult GD236.nd2	3	0	0	0	1
3	25do adult GD236.nd2	29	0	0	0	1
4	25do adult GD236.nd2	1	0	0	0	1
5	25do adult GD236.nd2	35	0	0	0	1
6	25do adult GD236.nd2	4	0	0	0	1
Feature	Mean	St.Dev	Minimum	Maximum
Numbers	21.6667	20.9735	1	58

## Sheet: WT
Item	Source	Numbers	ND.T	ND.Z	ND.M	Comment
1	25do adult.nd2	32	0	0	0	1
2	25do adult.nd2	0	0	0	0	1
3	25do adult.nd2	28	0	0	0	1
4	25do adult.nd2	0	0	0	0	1
Feature	Mean	St.Dev	Minimum	Maximum
Numbers	15	15.0665	0	32
Item	Source	Numbers	ND.T	ND.Z	ND.M	Comment
1	25do adult.nd2	30	0	0	0	1
2	25do adult.nd2	0	0	0	0	1
3	25do adult.nd2	34	0	0	0	1
4	25do adult.nd2	0	0	0	0	1
Feature	Mean	St.Dev	Minimum	Maximum
Numbers	16	16.0624	0	34
Item	Source	Numbers	ND.T	ND.Z	ND.M	Comment
1	25do adult.nd2	32	0	0	0	1
2	25do adult.nd2	0	0	0	0	1
3	25do adult.nd2	30	0	0	0	1
4	25do adult.nd2	0	0	0	0	1
Feature	Mean	St.Dev	Minimum	Maximum
Numbers	15.5	15.5161	0	32
Item	Source	Numbers	ND.T	ND.Z	ND.M	Comment
1	25do adult.nd2	33	0	0	0	1
2	25do adult.nd2	0	0	0	0	1
3	25do adult.nd2	31	0	0	0	1
4	25do adult.nd2	0	0	0	0	1
Feature	Mean	St.Dev	Minimum	Maximum
Numbers	16	16.0156	0	33

## Sheet: Gogo Fmi
Item	Source	Numbers	ND.T	ND.Z	ND.M	Comment
1	22do adult.nd2	19	0	0	0	1
2	22do adult.nd2	9	0	0	0	1
3	22do adult.nd2	18	0	0	0	1
4	22do adult.nd2	21	0	0	0	1
Feature	Mean	St.Dev	Minimum	Maximum
Numbers	16.75	4.603	9	21
Item	Source	Numbers	ND.T	ND.Z	ND.M	Comment
1	22do adult.nd2	15	0	0	0	1
2	22do adult.nd2	17	0	0	0	1
3	22do adult.nd2	25	0	0	0	1
4	22do adult.nd2	7	0	0	0	1
Feature	Mean	St.Dev	Minimum	Maximum
Numbers	16	6.4031	7	25
Item	Source	Numbers	ND.T	ND.Z	ND.M	Comment
1	22do adult.nd2	16	0	0	0	1
2	22do adult.nd2	9	0	0	0	1
3	22do adult.nd2	17	0	0	0	1
4	22do adult.nd2	13	0	0	0	1
Feature	Mean	St.Dev	Minimum	Maximum
Numbers	11.5	5.3151	4	17
Item	Source	Numbers	ND.T	ND.Z	ND.M	Comment
1	22do adult.nd2	24	0	0	0	1
2	22do adult.nd2	15	0	0	0	1
3	22do adult.nd2	16	0	0	0	1
4	22do adult.nd2	13	0	0	0	1
Feature	Mean	St.Dev	Minimum	Maximum
Numbers	14.75	6.4566	6	24
